# Supplementary material for: Systems analysis of avascular necrosis of femoral head using integrative data analysis and literature mining delineates pathways associated with disease
Source: Springer Nature journal article supplement (doi:10.1038/s41598-020-75197-0), 2020-10-22
Supplement: MOESM1 [file 41598_2020_75197_MOESM1_ESM.xls]

## Sheet: Title
			Supplementary Data S1 - AVNFH SNP analyses
												Sheet Title	Description
												1. List of SNP	AVNFH SNP genes used in the analyses
												2. KEGG SNP	Pathway annotation analysis using KEGG Pathways
												3. WikiPathways SNP	Pathway annotation analysis using WikiPathways
												4. Reactome SNP	Pathway annotation analysis using Reactome Pathways

## Sheet: List of SNP
SNP list
ABCB1
ACE
ADH2
ADIPOQ
ALDH2
AMPD1
ANK2
ANXA 6
ANXA2
APOB
APRT
BAZ2A
BMP6
BRCA2
CABIN1
CAT
COL22A1
COl2A1
CR2
CREB2
DNAH12
ECE1
EDN1
NOS3
F5
FAT1
GRIK1
GRIN3A
HIF1 A
IGFBP3
IL23
KDR
KL
MMP2
MMP8
MMP9
MTHFR
OPG
PAI1
PLEKHH1
PON1
F2
PTGIR
RANKL
SPEG
SREBP2
STARD13
STEAP4
TF
TGFBR2
TGFBR3
TYMS
USH1C
VDR
VEGF
VEGFC
ZFHX3

## Sheet: KEGG SNP
GOID	GOTerm	Ontology Source	Term PValue	Term PValue Corrected with Bonferroni step down	Group PValue	Group PValue Corrected with Bonferroni step down	GOLevels	GOGroups	% Associated Genes	Nr. Genes	Associated Genes Found
GO:0004211	Longevity regulating pathway	KEGG_17.03.2017	0.0011	0.0058	0.0011	0.0023	[-1]	Group0	4.49438	4	[ADIPOQ, ATF4, CAT, KL]
GO:0004610	Complement and coagulation cascades	KEGG_17.03.2017	0.00074	0.0044	0.00074	0.0022	[-1]	Group1	5.06329	4	[CR2, F2, F5, SERPINE1]
GO:0005212	Pancreatic cancer	KEGG_17.03.2017	0.0045	0.0045	0.0045	0.0045	[-1]	Group2	4.6875	3	[BRCA2, TGFBR2, VEGFA]
GO:0004066	HIF-1 signaling pathway	KEGG_17.03.2017	0.00016	0.0011	1e-06	5e-06	[-1]	Group3	4.9505	5	[EDN1, NOS3, SERPINE1, TF, VEGFA]
GO:0004933	AGE-RAGE signaling pathway in diabetic complications	KEGG_17.03.2017	6.6e-07	5.9e-06	1e-06	5e-06	[-1]	Group3	7.07071	7	[EDN1, MMP2, NOS3, SERPINE1, TGFBR2, VEGFA, VEGFC]
GO:0005418	Fluid shear stress and atherosclerosis	KEGG_17.03.2017	8.6e-05	0.00068	1e-06	5e-06	[-1]	Group3	4.22535	6	[EDN1, KDR, MMP2, MMP9, NOS3, VEGFA]
GO:0004370	VEGF signaling pathway	KEGG_17.03.2017	0.0035	0.0071	3.3e-06	1.3e-05	[-1]	Group4	5.08475	3	[KDR, NOS3, VEGFA]
GO:0004915	Estrogen signaling pathway	KEGG_17.03.2017	0.0016	0.0049	3.3e-06	1.3e-05	[-1]	Group4	4.08163	4	[ATF4, MMP2, MMP9, NOS3]
GO:0004933	AGE-RAGE signaling pathway in diabetic complications	KEGG_17.03.2017	6.6e-07	5.9e-06	3.3e-06	1.3e-05	[-1]	Group4	7.07071	7	[EDN1, MMP2, NOS3, SERPINE1, TGFBR2, VEGFA, VEGFC]
GO:0005219	Bladder cancer	KEGG_17.03.2017	0.0012	0.005	3.3e-06	1.3e-05	[-1]	Group4	7.31707	3	[MMP2, MMP9, VEGFA]
GO:0005418	Fluid shear stress and atherosclerosis	KEGG_17.03.2017	8.6e-05	0.00068	3.3e-06	1.3e-05	[-1]	Group4	4.22535	6	[EDN1, KDR, MMP2, MMP9, NOS3, VEGFA]

## Sheet: WikiPathways SNP
GOID	GOTerm	Ontology Source	Term PValue	Term PValue Corrected with Bonferroni step down	Group PValue	Group PValue Corrected with Bonferroni step down	GOLevels	GOGroups	% Associated Genes	Nr. Genes	Associated Genes Found
GO:0002848	Differentiation Pathway	WikiPathways_08.11.2016	0.0047	0.023	0.0047	0.0094	[-1]	Group0	6.25	3	[TF, TNFSF11, VEGFA]
GO:0003614	Photodynamic therapy-induced HIF-1 survival signaling	WikiPathways_08.11.2016	0.00012	0.0016	0.00012	0.00062	[-1]	Group1	10.8108	4	[EDN1, IGFBP3, SERPINE1, VEGFA]
GO:0003668	Hypothesized Pathways in Pathogenesis of Cardiovascular Disease	WikiPathways_08.11.2016	0.0007	0.0063	0.014	0.014	[-1]	Group2	12	3	[SERPINE1, TGFBR2, TGFBR3]
GO:0000560	TGF-beta Receptor Signaling	WikiPathways_08.11.2016	0.008	0.032	0.014	0.014	[-1]	Group2	5.17241	3	[SERPINE1, TGFBR2, TGFBR3]
GO:0002197	Endothelin Pathways	WikiPathways_08.11.2016	8.9e-05	0.0013	5.9e-05	0.00035	[-1]	Group3	11.7647	4	[ECE1, EDN1, NOS3, PTGIR]
GO:0000098	Prostaglandin Synthesis and Regulation	WikiPathways_08.11.2016	0.0012	0.0084	5.9e-05	0.00035	[-1]	Group3	10	3	[ANXA2, EDN1, PTGIR]
GO:0000015	Selenium Micronutrient Network	WikiPathways_08.11.2016	0.00038	0.0046	0.00024	0.00072	[-1]	Group4	5.61798	5	[APOB, CAT, F2, MTHFR, SERPINE1]
GO:0001533	Vitamin B12 Metabolism	WikiPathways_08.11.2016	0.00051	0.0051	0.00024	0.00072	[-1]	Group4	7.54717	4	[APOB, F2, MTHFR, SERPINE1]
GO:0000176	Folate Metabolism	WikiPathways_08.11.2016	0.00011	0.0016	0.00024	0.00072	[-1]	Group4	7.24638	5	[APOB, CAT, F2, MTHFR, SERPINE1]
GO:0000272	Blood Clotting Cascade	WikiPathways_08.11.2016	0.00047	0.0052	0.00024	0.00072	[-1]	Group4	13.6364	3	[F2, F5, SERPINE1]
GO:0000558	Complement and Coagulation Cascades	WikiPathways_08.11.2016	0.00077	0.0061	0.00024	0.00072	[-1]	Group4	6.77966	4	[CR2, F2, F5, SERPINE1]
GO:0000129	Matrix Metalloproteinases	WikiPathways_08.11.2016	0.0012	0.0084	0.00019	0.00079	[-1]	Group5	10	3	[MMP2, MMP8, MMP9]
GO:0001539	Angiogenesis	WikiPathways_08.11.2016	2.1e-05	0.00034	0.00019	0.00079	[-1]	Group5	16.6667	4	[KDR, MMP9, NOS3, VEGFA]
GO:0002324	AGE/RAGE pathway	WikiPathways_08.11.2016	0.011	0.011	0.00019	0.00079	[-1]	Group5	4.54545	3	[MMP2, MMP9, NOS3]
GO:0003617	Photodynamic therapy-induced NF-kB survival signaling	WikiPathways_08.11.2016	0.0019	0.011	0.00019	0.00079	[-1]	Group5	8.57143	3	[MMP2, MMP9, VEGFA]
GO:0003624	Lung fibrosis	WikiPathways_08.11.2016	0.01	0.03	0.00019	0.00079	[-1]	Group5	4.7619	3	[EDN1, MMP2, MMP9]
GO:0000474	Endochondral Ossification	WikiPathways_08.11.2016	0.01	0.021	0.00019	0.00079	[-1]	Group5	4.61538	3	[BMP6, MMP9, VEGFA]

## Sheet: Reactome SNP
GOID	GOTerm	Ontology Source	Term PValue	Term PValue Corrected with Bonferroni step down	Group PValue	Group PValue Corrected with Bonferroni step down	GOLevels	GOGroups	% Associated Genes	Nr. Genes	Associated Genes Found
GO:0000096	Endosomal/Vacuolar pathway	REACTOME_Pathways_09.11.2016	0.0005	0.0005	0.0005	0.0005	[-1]	Group0	6.97674	3	[MMP2, MMP8, MMP9]
GO:0000229	Activation of Matrix Metalloproteinases	REACTOME_Pathways_09.11.2016	0.0005	0.0005	0.0005	0.0005	[-1]	Group0	6.97674	3	[MMP2, MMP8, MMP9]
GO:0000522	VEGF ligand-receptor interactions	REACTOME_Pathways_09.11.2016	2.4e-06	9.9e-06	2.4e-06	7.4e-06	[-1]	Group1	37.5	3	[KDR, VEGFA, VEGFC]
GO:0000528	VEGF binds to VEGFR leading to receptor dimerization	REACTOME_Pathways_09.11.2016	2.4e-06	9.9e-06	2.4e-06	7.4e-06	[-1]	Group1	37.5	3	[KDR, VEGFA, VEGFC]
GO:0001627	Purine ribonucleoside monophosphate biosynthesis	REACTOME_Pathways_09.11.2016	0.00027	0.00054	0.00027	0.00054	[-1]	Group2	8.57143	3	[AMPD1, APRT, CAT]
GO:0001629	Purine metabolism	REACTOME_Pathways_09.11.2016	0.00027	0.00054	0.00027	0.00054	[-1]	Group2	8.57143	3	[AMPD1, APRT, CAT]
GO:0001653	Purine salvage	REACTOME_Pathways_09.11.2016	7.5e-05	0.00022	0.00027	0.00054	[-1]	Group2	13.0435	3	[AMPD1, APRT, CAT]
GO:0001654	Purine catabolism	REACTOME_Pathways_09.11.2016	7.5e-05	0.00022	0.00027	0.00054	[-1]	Group2	13.0435	3	[AMPD1, APRT, CAT]
