# Supplementary material for: Systems analysis of avascular necrosis of femoral head using integrative data analysis and literature mining delineates pathways associated with disease
Source: Springer Nature journal article supplement (doi:10.1038/s41598-020-75197-0), 2020-10-22
Supplement: MOESM2 [file 41598_2020_75197_MOESM2_ESM%20%281%29.xls]

## Sheet: Title
			Supplementary Data S2 - AVNFH Transcriptomics analyses
													Sheet Title	Description
													1. KEGG Transcriptomics	Pathway annotation analysis using KEGG Pathways
													2. WikiPathways Transcriptomics	Pathway annotation analysis using WikiPathways
													3. Reactome Transcriptomics	Pathway annotation analysis using Reactome Pathways
													4. GSE74089	Differential gene expression analysis using GEO2R of data GSE74089

## Sheet: Kegg Transcriptomics
GOID	GOTerm	Ontology Source	Term PValue	Term PValue Corrected with Bonferroni step down	Group PValue	Group PValue Corrected with Bonferroni step down	GOLevels	GOGroups	% Associated Genes	Nr. Genes	Associated Genes Found
GO:0002010	ABC transporters	KEGG_17.03.2017	0.37	1	0.37	1	[-1]	Group053	40	18	[ABCA2, ABCA4, ABCA8, ABCA9, ABCB10, ABCB4, ABCB7, ABCB8, ABCC1, ABCC10, ABCC2, ABCC3, ABCC5, ABCC6, ABCC8, ABCD1, ABCD4, ABCG1]
GO:0004933	AGE-RAGE signaling pathway in diabetic complications	KEGG_17.03.2017	0.0022	0.53	0.024	1	[-1]	Group171	62.6263	62	[AGER, AKT1, AKT2, AKT3, BAX, CASP3, CCND1, CDC42, CDKN1B, COL1A1, COL1A2, COL3A1, DIAPH1, EDN1, EGR1, FN1, FOXO1, ICAM1, IL6, JAK2, JUN, KRAS, MAPK10, MAPK11, MAPK12, MAPK3, MAPK8, MMP2, NFATC1, NOS3, NOX1, NRAS, PIK3CA, PIK3R2, PIM1, PLCB4, PLCD4, PRKCA, PRKCB, PRKCD, PRKCE, PRKCZ, RAC1, RELA, SELE, SERPINE1, SMAD2, SMAD3, SMAD4, STAT1, STAT3, STAT5B, TGFB1, TGFB3, TGFBR1, TGFBR2, THBD, TNF, VC…
GO:0004152	AMPK signaling pathway	KEGG_17.03.2017	0.012	1	0.00036	0.053	[-1]	Group169	58.6777	71	[ACACA, ACACB, ADIPOR1, ADRA1A, AKT1, AKT1S1, AKT2, AKT3, CAB39, CAB39L, CAMKK2, CCND1, CPT1A, CPT1C, CREB1, CREB3L2, CREB3L4, CREB5, CRTC2, EEF2, EEF2K, EIF4EBP1, ELAVL1, FOXO1, FOXO3, HMGCR, IGF1, IGF1R, INS, INSR, IRS1, IRS2, LEPR, MAP3K7, MTOR, PCK2, PDPK1, PFKFB2, PFKFB3, PFKFB4, PFKM, PFKP, PIK3CA, PIK3R2, PPARGC1A, PPP2CA, PPP2R2A, PPP2R3A, PPP2R3C, PPP2R5B, PPP2R5C, PPP2R5E, PRKAA1, PRKAA…
GO:0005221	Acute myeloid leukemia	KEGG_17.03.2017	0.077	1	0.024	1	[-1]	Group171	60	33	[AKT1, AKT2, AKT3, ARAF, BAD, BRAF, CCND1, EIF4EBP1, GRB2, JUP, KIT, KRAS, LEF1, MAP2K1, MAPK3, MTOR, MYC, NRAS, PIK3CA, PIK3R2, PIM1, PML, PPARD, RARA, RELA, RPS6KB1, RPS6KB2, RUNX1, RUNX1T1, SOS2, STAT3, STAT5B, TCF7L2]
GO:0004520	Adherens junction	KEGG_17.03.2017	0.00019	0.047	0.00019	0.028	[-1]	Group094	69.4444	50	[ACP1, ACTB, ACTG1, AFDN, BAIAP2, CDC42, CDH1, CREBBP, CSNK2A1, CSNK2A2, CTNNA1, CTNNB1, CTNND1, EGFR, EP300, ERBB2, FGFR1, IGF1R, INSR, IQGAP1, LEF1, LMO7, MAP3K7, MAPK3, MET, NECTIN2, NECTIN3, NLK, PARD3, PTPN1, PTPN6, PTPRF, RAC1, RAC2, RHOA, SMAD2, SMAD3, SMAD4, SNAI2, SORBS1, TCF7L2, TGFBR1, TGFBR2, TJP1, VCL, WAS, WASF1, WASF3, WASL, YES1]
GO:0004920	Adipocytokine signaling pathway	KEGG_17.03.2017	0.089	1	0.00036	0.053	[-1]	Group169	57.971	40	[ACACB, ACSBG2, ACSL3, ACSL4, ACSL5, ADIPOR1, AKT1, AKT2, AKT3, CAMKK2, CPT1A, CPT1C, IRS1, IRS2, JAK2, LEPR, MAPK10, MAPK8, MTOR, NFKBIA, NFKBIB, PCK2, PPARGC1A, PRKAA1, PRKAA2, PRKAB2, PRKAG1, PRKAG2, PRKAG3, PRKCQ, PTPN11, RELA, SLC2A1, SOCS3, STAT3, STK11, TNF, TNFRSF1B, TRADD, TRAF2]
GO:0004261	Adrenergic signaling in cardiomyocytes	KEGG_17.03.2017	0.61	1	0.97	1	[-1]	Group172	45.1389	65	[ADCY1, ADCY4, ADCY6, ADCY7, ADCY9, ADRA1A, AKT1, AKT2, AKT3, ATF4, ATP1A1, ATP1A4, ATP1B1, ATP1B2, ATP1B3, ATP2A2, ATP2B4, CACNA1C, CACNA1S, CACNA2D1, CACNA2D2, CACNG4, CACNG5, CACNG8, CALM1, CALM2, CALM3, CALML6, CAMK2A, CAMK2G, CREB1, CREB3L2, CREB3L4, CREB5, CREM, GNAI1, GNAI2, GNAI3, GNAQ, GNAS, KCNE1, MAPK11, MAPK12, MAPK3, PIK3R6, PLCB4, PPP1CB, PPP1CC, PPP2CA, PPP2R2A, PPP2R3A, PPP2R3C, P…
GO:0005143	African trypanosomiasis	KEGG_17.03.2017	1	1	1	1	[-1]	Group136	48.5714	17	[APOA1, APOL1, FAS, GNAQ, HBB, ICAM1, IL6, LAMA4, PLCB4, PRKCA, PRKCB, PRKCG, SELE, THOP1, TLR9, TNF, VCAM1]
GO:0000250	Alanine, aspartate and glutamate metabolism	KEGG_17.03.2017	0.86	1	0.76	1	[-1]	Group149	45.7143	16	[ABAT, ADSL, ADSS, ASS1, CAD, CPS1, GFPT1, GFPT2, GLS, GLUD1, GLUD2, GLUL, GOT2, NAT8L, NIT2, RIMKLA]
GO:0005034	Alcoholism	KEGG_17.03.2017	0.7	1	0.18	1	[-1]	Group152	48.8889	88	[ADORA2B, ARAF, ATF4, BRAF, CALM1, CALM2, CALM3, CALML6, CAMK4, CAMKK1, CAMKK2, CREB1, CREB3L2, CREB3L4, CREB5, CRH, FOSB, GNAI1, GNAI2, GNAI3, GNAO1, GNAS, GNB1, GNB4, GNB5, GNG10, GNG11, GNG12, GNG13, GNG7, GNG8, GRB2, GRIN2A, GRIN2C, GRIN2D, GRIN3B, H2AFB2, H2AFV, H2AFX, H2AFZ, H2BFM, H3F3A, H3F3B, HAT1, HDAC1, HDAC2, HDAC3, HDAC5, HDAC7, HIST1H2AC, HIST1H2AE, HIST1H2AI, HIST1H2AL, HIST1H2BC, …
GO:0004925	Aldosterone synthesis and secretion	KEGG_17.03.2017	0.075	1	0.97	1	[-1]	Group172	57.3171	47	[ADCY1, ADCY4, ADCY6, ADCY7, ADCY9, ATF1, ATF4, CACNA1C, CACNA1H, CACNA1I, CACNA1S, CALM1, CALM2, CALM3, CALML6, CAMK1D, CAMK2A, CAMK2G, CAMK4, CREB1, CREB3L2, CREB3L4, CREB5, CYP11A1, CYP21A2, GNA11, GNAQ, GNAS, ITPR1, ITPR2, ITPR3, KCNK3, LDLR, MC2R, NPR1, NR4A2, PLCB4, PRKACA, PRKACB, PRKCA, PRKCB, PRKCE, PRKCG, PRKD1, PRKD2, PRKD3, SCARB1]
GO:0004925	Aldosterone synthesis and secretion	KEGG_17.03.2017	0.075	1	0.23	1	[-1]	Group166	57.3171	47	[ADCY1, ADCY4, ADCY6, ADCY7, ADCY9, ATF1, ATF4, CACNA1C, CACNA1H, CACNA1I, CACNA1S, CALM1, CALM2, CALM3, CALML6, CAMK1D, CAMK2A, CAMK2G, CAMK4, CREB1, CREB3L2, CREB3L4, CREB5, CYP11A1, CYP21A2, GNA11, GNAQ, GNAS, ITPR1, ITPR2, ITPR3, KCNK3, LDLR, MC2R, NPR1, NR4A2, PLCB4, PRKACA, PRKACB, PRKCA, PRKCB, PRKCE, PRKCG, PRKD1, PRKD2, PRKD3, SCARB1]
GO:0004960	Aldosterone-regulated sodium reabsorption	KEGG_17.03.2017	0.25	1	0.25	1	[-1]	Group117	56.7568	21	[ATP1A1, ATP1A4, ATP1B1, ATP1B2, ATP1B3, HSD11B2, IGF1, INS, INSR, IRS1, KRAS, MAPK3, NEDD4L, PDPK1, PIK3CA, PIK3R2, PRKCA, PRKCB, PRKCG, SFN, SGK1]
GO:0005330	Allograft rejection	KEGG_17.03.2017	0.19	1	0.89	1	[-1]	Group170	57.8947	22	[CD28, CD40, FAS, GZMB, HLA-A, HLA-B, HLA-C, HLA-DMA, HLA-DMB, HLA-DOA, HLA-DPA1, HLA-DPB1, HLA-DQA1, HLA-DQB1, HLA-DRA, HLA-DRB1, HLA-DRB3, HLA-DRB4, HLA-DRB5, HLA-E, HLA-F, TNF]
GO:0005010	Alzheimer's disease	KEGG_17.03.2017	0.00018	0.047	6.9e-05	0.01	[-1]	Group165	61.4035	105	[ADAM10, APH1A, APH1B, APOE, APP, ATF6, ATP2A1, ATP2A2, ATP5A1, ATP5C1, ATP5E, ATP5F1, ATP5G1, ATP5G2, ATP5G3, ATP5H, ATP5J, ATP5O, BACE1, BACE2, BAD, BID, CACNA1C, CACNA1S, CALM1, CALM2, CALM3, CALML6, CAPN2, CASP3, CASP7, COX4I1, COX4I2, COX6A1, COX6A2, COX6B1, COX6B2, COX6C, COX7A1, COX7A2, COX7A2L, COX7B, COX7C, COX8A, CYCS, EIF2AK3, FAS, GAPDH, GNAQ, GRIN2A, GRIN2C, GRIN2D, IDE, ITPR1, ITPR2…
GO:0000520	Amino sugar and nucleotide sugar metabolism	KEGG_17.03.2017	0.0084	1	0.0084	1	[-1]	Group024	66.6667	32	[CHIT1, CMAS, CYB5R2, CYB5R3, CYB5R4, CYB5RL, FPGT, GALT, GFPT1, GFPT2, GMDS, GMPPA, GNE, GNPDA1, GNPDA2, GNPNAT1, GPI, HEXA, HK1, HKDC1, MPI, NANS, NPL, PGM1, PGM2, PGM3, PMM2, RENBP, UAP1, UAP1L1, UGDH, UGP2]
GO:0000970	Aminoacyl-tRNA biosynthesis	KEGG_17.03.2017	0.0061	1	0.0061	0.77	[-1]	Group051	30.303	20	[CARS2, DARS, DARS2, EPRS, GARS, GATB, HARS, IARS, IARS2, KARS, LARS2, MARS, NARS, PSTK, QARS, RARS, RARS2, TARS, WARS2, YARS2]
GO:0005146	Amoebiasis	KEGG_17.03.2017	0.75	1	0.75	1	[-1]	Group138	48.9583	47	[ADCY1, ARG1, ARG2, C8B, CASP3, CD14, COL1A1, COL1A2, COL3A1, CSF2, CTSG, CXCL1, FN1, GNA11, GNAQ, GNAS, HSPB1, IL1R1, IL6, ITGAM, ITGB2, LAMA4, LAMA5, LAMB1, LAMB2, LAMB3, LAMC1, LAMC3, MUC2, NOS2, PIK3CA, PIK3R2, PLCB4, PRKACA, PRKACB, PRKCA, PRKCB, PRKCG, PTK2, RAB5A, RAB7A, RELA, SERPINB6, TGFB1, TGFB3, TNF, VCL]
GO:0005031	Amphetamine addiction	KEGG_17.03.2017	0.17	1	0.97	1	[-1]	Group172	55.8824	38	[ATF4, CACNA1C, CALM1, CALM2, CALM3, CALML6, CAMK2A, CAMK2G, CAMK4, CREB1, CREB3L2, CREB3L4, CREB5, FOS, FOSB, GNAS, GRIA1, GRIA3, GRIN2A, GRIN2C, GRIN2D, GRIN3B, HDAC1, JUN, PPP1CB, PPP1CC, PPP3CA, PPP3CB, PPP3CC, PRKACA, PRKACB, PRKCA, PRKCB, PRKCG, SLC18A1, SLC6A3, STX1A, TH]
GO:0005031	Amphetamine addiction	KEGG_17.03.2017	0.17	1	0.23	1	[-1]	Group166	55.8824	38	[ATF4, CACNA1C, CALM1, CALM2, CALM3, CALML6, CAMK2A, CAMK2G, CAMK4, CREB1, CREB3L2, CREB3L4, CREB5, FOS, FOSB, GNAS, GRIA1, GRIA3, GRIN2A, GRIN2C, GRIN2D, GRIN3B, HDAC1, JUN, PPP1CB, PPP1CC, PPP3CA, PPP3CB, PPP3CC, PRKACA, PRKACB, PRKCA, PRKCB, PRKCG, SLC18A1, SLC6A3, STX1A, TH]
GO:0005014	Amyotrophic lateral sclerosis (ALS)	KEGG_17.03.2017	0.12	1	0.12	1	[-1]	Group127	58.8235	30	[ALS2, BAD, BAX, BID, CASP3, CAT, CCS, CYCS, DERL1, GPX1, GRIA1, GRIN2A, GRIN2C, GRIN2D, MAP2K3, MAP2K6, MAP3K5, MAPK11, MAPK12, NEFH, NOS1, PPP3CA, PPP3CB, PPP3CC, PRPH, RAB5A, RAC1, SOD1, TNF, TNFRSF1B]
GO:0004612	Antigen processing and presentation	KEGG_17.03.2017	0.0082	1	0.89	1	[-1]	Group170	62.3377	48	[CALR, CANX, CD4, CD74, CD8A, CD8B, CREB1, CTSB, CTSL, HLA-A, HLA-B, HLA-C, HLA-DMA, HLA-DMB, HLA-DOA, HLA-DPA1, HLA-DPB1, HLA-DQA1, HLA-DQB1, HLA-DRA, HLA-DRB1, HLA-DRB3, HLA-DRB4, HLA-DRB5, HLA-E, HLA-F, HSP90AA1, HSP90AB1, HSPA1A, HSPA1B, HSPA1L, HSPA4, HSPA5, IFI30, KIR2DL4, KIR2DL5A, KIR2DS4, KIR3DL1, LGMN, NFYB, NFYC, PDIA3, PSME1, PSME2, RFX5, RFXAP, TAPBP, TNF]
GO:0004371	Apelin signaling pathway	KEGG_17.03.2017	0.0025	0.59	0.97	1	[-1]	Group172	60.1449	83	[ADCY1, ADCY4, ADCY6, ADCY7, ADCY9, AKT1, AKT2, AKT3, APLN, APLNR, CALM1, CALM2, CALM3, CALML6, CAMK4, CCND1, CDH1, EGR1, GABARAP, GABARAPL1, GABARAPL2, GNA13, GNAI1, GNAI2, GNAI3, GNAQ, GNB1, GNB4, GNB5, GNG10, GNG11, GNG12, GNG13, GNG7, GNG8, HDAC5, ITPR1, ITPR2, ITPR3, JAG1, KLF2, KRAS, MAP2K1, MAPK3, MEF2B, MEF2D, MRAS, MTOR, MYLK, NOS1, NOS2, NOS3, NOTCH3, NRAS, PDE3B, PIK3C3, PIK3R4, PIK3R6…
GO:0004215	Apoptosis	KEGG_17.03.2017	0.38	1	0.38	1	[-1]	Group081	39.3939	13	[BAK1, BAX, BCL2L11, BID, BIRC2, BIRC6, CASP3, CASP7, CYCS, DIABLO, MAPK10, MAPK8, XIAP]
GO:0004210	Apoptosis	KEGG_17.03.2017	0.07	1	0.07	1	[-1]	Group080	55.0725	76	[ACTB, ACTG1, AIFM1, AKT1, AKT2, AKT3, ATF4, ATM, BAD, BAK1, BAX, BCL2A1, BCL2L11, BID, BIRC2, CAPN2, CASP10, CASP2, CASP3, CASP6, CASP7, CFLAR, CSF2RB, CTSB, CTSC, CTSF, CTSH, CTSK, CTSL, CTSO, CTSZ, CYCS, DIABLO, EIF2AK3, EIF2S1, FAS, FOS, GADD45A, GADD45B, GADD45G, GZMB, ITPR1, ITPR2, ITPR3, JUN, KRAS, LMNA, MAP2K1, MAP3K5, MAPK10, MAPK3, MAPK8, MCL1, NFKBIA, NRAS, PDPK1, PIDD1, PIK3CA, PIK3R2…
GO:0000590	Arachidonic acid metabolism	KEGG_17.03.2017	0.25	1	0.36	1	[-1]	Group161	54.8387	34	[AKR1C3, ALOX15, ALOX15B, ALOX5, CBR1, CBR3, CYP2B6, CYP2E1, CYP2U1, CYP4A11, FAM213B, GGT1, GPX1, GPX2, GPX3, GPX5, GPX6, GPX7, GPX8, JMJD7-PLA2G4B, LTC4S, PLA2G10, PLA2G12A, PLA2G16, PLA2G1B, PLA2G2D, PLA2G4A, PLA2G4E, PLA2G4F, PLA2G6, PTGES, PTGES3, PTGIS, PTGS2]
GO:0000330	Arginine and proline metabolism	KEGG_17.03.2017	0.15	1	0.15	1	[-1]	Group131	58	29	[ALDH18A1, ALDH3A2, ALDH7A1, ALDH9A1, AMD1, AOC1, ARG1, ARG2, AZIN2, CARNS1, GAMT, GOT2, L3HYPDH, LAP3, NOS1, NOS2, NOS3, OAT, ODC1, P4HA1, P4HA2, PRODH, PYCR1, PYCR2, PYCRL, SAT1, SMOX, SMS, SRM]
GO:0000220	Arginine biosynthesis	KEGG_17.03.2017	0.19	1	0.76	1	[-1]	Group149	61.9048	13	[ARG1, ARG2, ASS1, CPS1, GLS, GLUD1, GLUD2, GLUL, GOT2, NAGS, NOS1, NOS2, NOS3]
GO:0005412	Arrhythmogenic right ventricular cardiomyopathy (ARVC)	KEGG_17.03.2017	0.4	1	0.13	1	[-1]	Group153	52.7778	38	[ACTB, ACTG1, ACTN2, ATP2A2, CACNA1C, CACNA1S, CACNA2D1, CACNA2D2, CACNG4, CACNG5, CACNG8, CDH2, CTNNA1, CTNNB1, DAG1, DES, DMD, DSP, GJA1, ITGA10, ITGA11, ITGA2B, ITGA5, ITGA6, ITGA7, ITGAV, ITGB1, ITGB4, ITGB5, ITGB7, ITGB8, JUP, LEF1, LMNA, SGCA, SGCB, SGCD, TCF7L2]
GO:0000053	Ascorbate and aldarate metabolism	KEGG_17.03.2017	0.01	1	0.033	1	[-1]	Group157	22.2222	6	[ALDH3A2, ALDH7A1, ALDH9A1, MIOX, UGDH, UGT1A6]
GO:0005310	Asthma	KEGG_17.03.2017	0.71	1	0.89	1	[-1]	Group170	51.6129	16	[CD40, FCER1A, FCER1G, HLA-DMA, HLA-DMB, HLA-DOA, HLA-DPA1, HLA-DPB1, HLA-DQA1, HLA-DQB1, HLA-DRA, HLA-DRB1, HLA-DRB3, HLA-DRB4, HLA-DRB5, TNF]
GO:0005310	Asthma	KEGG_17.03.2017	0.71	1	0.013	1	[-1]	Group168	51.6129	16	[CD40, FCER1A, FCER1G, HLA-DMA, HLA-DMB, HLA-DOA, HLA-DPA1, HLA-DPB1, HLA-DQA1, HLA-DQB1, HLA-DRA, HLA-DRB1, HLA-DRB3, HLA-DRB4, HLA-DRB5, TNF]
GO:0005320	Autoimmune thyroid disease	KEGG_17.03.2017	0.41	1	0.89	1	[-1]	Group170	41.5094	22	[CD28, CD40, FAS, GZMB, HLA-A, HLA-B, HLA-C, HLA-DMA, HLA-DMB, HLA-DOA, HLA-DPA1, HLA-DPB1, HLA-DQA1, HLA-DQB1, HLA-DRA, HLA-DRB1, HLA-DRB3, HLA-DRB4, HLA-DRB5, HLA-E, HLA-F, IFNA4]
GO:0004140	Autophagy	KEGG_17.03.2017	3.7e-07	9.9e-05	3.7e-07	5.9e-05	[-1]	Group072	69.5312	89	[AKT1, AKT1S1, AKT2, AKT3, AMBRA1, ATG12, ATG13, ATG14, ATG16L2, ATG2A, ATG2B, ATG4B, ATG4C, ATG4D, ATG5, BAD, BNIP3, CAMKK2, CFLAR, CTSB, CTSL, DAPK2, DAPK3, DDIT4, EIF2AK3, EIF2AK4, EIF2S1, GABARAP, GABARAPL1, GABARAPL2, HIF1A, HMGB1, IGBP1, IGF1R, INS, IRS1, IRS2, ITPR1, KRAS, LAMP1, LAMP2, MAP2K1, MAP3K7, MAPK10, MAPK3, MAPK8, MLST8, MRAS, MTMR14, MTMR4, MTOR, NRAS, NRBF2, PDPK1, PIK3C3, PIK3…
GO:0004360	Axon guidance	KEGG_17.03.2017	0.35	1	0.35	1	[-1]	Group089	50.8571	89	[ABL1, ABLIM2, ABLIM3, BMPR2, BOC, CAMK2A, CAMK2G, CDC42, CFL2, CXCR4, DPYSL2, EFNA5, ENAH, EPHA3, EPHA7, EPHA8, EPHB2, GNAI1, GNAI2, GNAI3, ITGB1, KRAS, LIMK1, LRRC4, LRRC4C, MAPK3, MET, NCK1, NCK2, NFATC2, NFATC4, NGEF, NRAS, NRP1, NTN1, NTN4, NTNG2, PAK1, PAK2, PAK4, PAK6, PARD3, PARD6G, PDK1, PIK3CA, PIK3R2, PLXNA1, PLXNA2, PLXNA3, PLXNA4, PLXNB1, PLXNB2, PLXNB3, PPP3CA, PPP3CB, PPP3CC, PRKCA…
GO:0004662	B cell receptor signaling pathway	KEGG_17.03.2017	0.33	1	0.0081	1	[-1]	Group163	53.5211	38	[AKT1, AKT2, AKT3, BTK, CARD11, CD72, CD79A, CD81, DAPP1, FOS, GRB2, IFITM1, INPP5D, INPPL1, JUN, KRAS, LILRB3, LYN, MAP2K1, MAPK3, NFATC1, NFATC2, NFKBIA, NFKBIB, NRAS, PIK3CA, PIK3R2, PPP3CA, PPP3CB, PPP3CC, PRKCB, PTPN6, RAC1, RAC2, RELA, SOS2, VAV1, VAV2]
GO:0005100	Bacterial invasion of epithelial cells	KEGG_17.03.2017	0.16	1	0.011	1	[-1]	Group156	55.2632	42	[ACTB, ACTG1, ARHGAP10, ARHGEF26, ARPC1B, ARPC2, ARPC5, BCAR1, CAV1, CAV2, CBL, CD2AP, CDC42, CDH1, CLTA, CLTB, CRKL, CTNNA1, CTNNB1, CTTN, DNM1, DOCK1, ELMO1, ELMO2, FN1, GAB1, HCLS1, ITGA5, ITGB1, MET, PIK3CA, PIK3R2, PTK2, RAC1, RHOA, RHOG, SHC1, SHC4, VCL, WAS, WASF1, WASL]
GO:0005217	Basal cell carcinoma	KEGG_17.03.2017	0.68	1	0.97	1	[-1]	Group172	43.6364	24	[AXIN1, BMP2, BMP4, CTNNB1, DVL1, FZD1, FZD10, FZD5, FZD6, FZD7, FZD8, FZD9, GLI1, GLI3, HHIP, LEF1, SHH, SUFU, TCF7L2, WNT1, WNT10A, WNT2B, WNT3A, WNT6]
GO:0003022	Basal transcription factors	KEGG_17.03.2017	0.29	1	0.29	1	[-1]	Group060	55.5556	25	[CDK7, ERCC2, GTF2A2, GTF2E1, GTF2E2, GTF2F1, GTF2F2, GTF2H2C_2, GTF2H4, GTF2I, MNAT1, TAF11, TAF12, TAF1L, TAF2, TAF4, TAF4B, TAF6, TAF6L, TAF7, TAF7L, TAF8, TAF9, TBP, TBPL1]
GO:0003410	Base excision repair	KEGG_17.03.2017	0.72	1	0.72	1	[-1]	Group065	51.5152	17	[HMGB1, LIG1, MBD4, MPG, NEIL1, NEIL2, OGG1, PCNA, POLD4, POLE, POLE2, POLE3, POLE4, POLL, SMUG1, TDG, UNG]
GO:0004976	Bile secretion	KEGG_17.03.2017	0.4	1	0.97	1	[-1]	Group172	42.2535	30	[ABCB4, ABCC2, ABCC3, ADCY1, ADCY4, ADCY6, ADCY7, ADCY9, AQP1, AQP4, AQP8, ATP1A1, ATP1A4, ATP1B1, ATP1B2, ATP1B3, GNAS, HMGCR, KCNN2, LDLR, NR0B2, PRKACA, PRKACB, SCARB1, SLC22A7, SLC22A8, SLC2A1, SLC4A4, SLC4A5, SLC51A]
GO:0001040	Biosynthesis of unsaturated fatty acids	KEGG_17.03.2017	0.036	1	0.0028	0.38	[-1]	Group147	69.5652	16	[ACAA1, ACOT1, ACOT4, ACOT7, ACOX1, ELOVL5, FADS1, FADS2, HACD2, HACD3, HACD4, HADHA, HSD17B12, SCD, SCD5, TECR]
GO:0005219	Bladder cancer	KEGG_17.03.2017	0.041	1	0.024	1	[-1]	Group171	63.4146	26	[ARAF, BRAF, CCND1, CDH1, CDKN2A, DAPK2, DAPK3, E2F3, EGFR, ERBB2, HBEGF, KRAS, MAP2K1, MAPK3, MDM2, MMP1, MMP2, MYC, NRAS, RASSF1, RB1, RPS6KA5, THBS1, TYMP, UPK3A, VEGFA]
GO:0005224	Breast cancer	KEGG_17.03.2017	0.4	1	0.024	1	[-1]	Group171	43.75	63	[AKT1, AKT2, AKT3, ARAF, AXIN1, BRAF, CCND1, CDK6, CSNK1A1, CTNNB1, DLL1, DVL1, E2F3, EGFR, ERBB2, ESR1, FGF1, FGF2, FGF22, FGF7, FGFR1, FLT4, FOS, FZD1, FZD10, FZD5, FZD6, FZD7, FZD8, FZD9, GRB2, HEY2, IGF1, IGF1R, JAG1, JUN, KIT, KRAS, LEF1, MAP2K1, MAPK3, MTOR, MYC, NOTCH2, NOTCH3, NRAS, PIK3CA, PIK3R2, PTEN, RB1, RPS6KB1, RPS6KB2, SHC1, SHC4, SOS2, SP1, TCF7L2, TNFSF11, WNT1, WNT10A, WNT2B, W…
GO:0000650	Butanoate metabolism	KEGG_17.03.2017	0.7	1	0.69	1	[-1]	Group162	42.8571	12	[AACS, ABAT, ACAT1, ACAT2, ACSM5, ECHS1, HADH, HADHA, HMGCL, HMGCS1, L2HGDH, OXCT1]
GO:0004020	Calcium signaling pathway	KEGG_17.03.2017	0.29	1	0.97	1	[-1]	Group172	43.4066	79	[ADCY1, ADCY4, ADCY7, ADCY9, ADORA2B, ADRA1A, ATP2A1, ATP2A2, ATP2B4, BDKRB1, BDKRB2, CACNA1A, CACNA1C, CACNA1H, CACNA1I, CACNA1S, CALM1, CALM2, CALM3, CALML6, CAMK2A, CAMK2G, CAMK4, CYSLTR1, EDNRA, EGFR, ERBB2, ERBB4, GNA11, GNAQ, GNAS, GRIN2A, GRIN2C, GRIN2D, HRH1, HRH2, HTR2A, HTR6, ITPKB, ITPR1, ITPR2, ITPR3, LTB4R2, MCU, MYLK, NOS1, NOS2, NOS3, P2RX1, P2RX2, P2RX4, P2RX5, P2RX6, PDE1A, PDE1C…
GO:0004973	Carbohydrate digestion and absorption	KEGG_17.03.2017	0.65	1	0.65	1	[-1]	Group121	43.1818	19	[AKT1, AKT2, AKT3, AMY1C, ATP1A1, ATP1A4, ATP1B1, ATP1B2, ATP1B3, HK1, HKDC1, LCT, PIK3CA, PIK3R2, PRKCB, SLC2A5, SLC37A4, TAS1R2, TAS1R3]
GO:0004260	Cardiac muscle contraction	KEGG_17.03.2017	0.9	1	0.9	1	[-1]	Group082	46.1538	36	[ATP1A1, ATP1A4, ATP1B1, ATP1B2, ATP1B3, ATP2A2, CACNA1C, CACNA1S, CACNA2D1, CACNA2D2, CACNG4, CACNG5, CACNG8, COX4I1, COX4I2, COX6A1, COX6A2, COX6B1, COX6B2, COX6C, COX7A1, COX7A2, COX7A2L, COX7B, COX7C, COX8A, SLC9A6, TNNI3, TPM3, TPM4, UQCR11, UQCRB, UQCRC2, UQCRFS1, UQCRH, UQCRQ]
GO:0004514	Cell adhesion molecules (CAMs)	KEGG_17.03.2017	0.028	1	0.028	1	[-1]	Group092	56.5517	82	[ALCAM, CADM1, CD2, CD274, CD276, CD28, CD34, CD4, CD40, CD58, CD8A, CD8B, CD99, CDH1, CDH2, CDH5, CLDN11, CLDN15, CLDN18, CLDN19, CLDN22, CLDN23, CLDN25, CLDN4, ESAM, GLG1, HLA-A, HLA-B, HLA-C, HLA-DMA, HLA-DMB, HLA-DOA, HLA-DPA1, HLA-DPB1, HLA-DQA1, HLA-DQB1, HLA-DRA, HLA-DRB1, HLA-DRB3, HLA-DRB4, HLA-DRB5, HLA-E, HLA-F, ICAM1, ICAM2, ICAM3, ITGA6, ITGAM, ITGAV, ITGB1, ITGB2, ITGB7, ITGB8, JAM2…
GO:0004110	Cell cycle	KEGG_17.03.2017	0.14	1	0.14	1	[-1]	Group017	54.0323	67	[ABL1, ANAPC1, ANAPC10, ANAPC11, ANAPC2, ANAPC4, ATM, ATR, BUB3, CCND1, CCND2, CCNE2, CDC16, CDC23, CDC26, CDC27, CDC7, CDK6, CDK7, CDKN1B, CDKN2A, CDKN2C, CDKN2D, CREBBP, E2F3, EP300, ESPL1, FZR1, GADD45A, GADD45B, GADD45G, HDAC1, HDAC2, MCM2, MCM3, MCM4, MCM7, MDM2, MYC, ORC6, PCNA, PRKDC, PTTG1, PTTG2, RAD21, RB1, RBL2, RBX1, SFN, SKP1, SMAD2, SMAD3, SMAD4, SMC3, STAG1, STAG2, TFDP1, TGFB1, TG…
GO:0005230	Central carbon metabolism in cancer	KEGG_17.03.2017	0.08	1	0.024	1	[-1]	Group171	58.4615	38	[AKT1, AKT2, AKT3, EGFR, ERBB2, FGFR1, GLS, HIF1A, HK1, HKDC1, IDH1, KIT, KRAS, LDHA, MAP2K1, MAPK3, MET, MTOR, MYC, NRAS, NTRK3, PDGFRA, PDGFRB, PDHA1, PDHB, PDK1, PFKM, PFKP, PGAM1, PGAM4, PIK3CA, PIK3R2, PKM, PTEN, SIRT3, SLC16A3, SLC2A1, SLC7A5]
GO:0005142	Chagas disease (American trypanosomiasis)	KEGG_17.03.2017	0.19	1	0.072	1	[-1]	Group164	53.9216	55	[ACE, ADCY1, AKT1, AKT2, AKT3, BDKRB2, C1QA, C1QB, C1QC, C3, CALR, CCL3, CCL5, CD3D, CD3E, CD3G, CFLAR, FAS, FOS, GNA11, GNAI1, GNAI2, GNAI3, GNAO1, GNAQ, GNAS, IFNGR1, IFNGR2, IL6, IRAK4, JUN, MAP2K4, MAPK10, MAPK11, MAPK12, MAPK3, MAPK8, NFKBIA, NOS2, PIK3CA, PIK3R2, PLCB4, PPP2CA, PPP2R2A, RELA, SERPINE1, SMAD2, SMAD3, TGFB1, TGFB3, TGFBR1, TGFBR2, TICAM1, TLR9, TNF]
GO:0005204	Chemical carcinogenesis	KEGG_17.03.2017	7.7e-05	0.019	0.00054	0.078	[-1]	Group151	25.6098	21	[ADH1C, ALDH3B1, CBR1, CYP1B1, CYP2A13, CYP2E1, CYP3A5, GSTA4, GSTK1, GSTM3, GSTM5, GSTO1, GSTP1, GSTT1, GSTT2, GSTT2B, KYAT1, MGST3, NAT1, PTGS2, UGT1A6]
GO:0004062	Chemokine signaling pathway	KEGG_17.03.2017	0.028	1	0.028	1	[-1]	Group093	55.4945	101	[ADCY1, ADCY4, ADCY6, ADCY7, ADCY9, AKT1, AKT2, AKT3, BCAR1, BRAF, CCL14, CCL15, CCL16, CCL17, CCL18, CCL19, CCL24, CCL26, CCL27, CCL3, CCL4, CCL5, CCR5, CDC42, CRKL, CX3CL1, CXCL1, CXCL16, CXCL2, CXCL5, CXCR1, CXCR2, CXCR4, ELMO1, FGR, FOXO3, GNAI1, GNAI2, GNAI3, GNB1, GNB4, GNB5, GNG10, GNG11, GNG12, GNG13, GNG7, GNG8, GRB2, GRK1, GRK2, GRK3, GRK4, GRK5, GRK6, GSK3A, HCK, JAK2, JAK3, KRAS, LYN,…
GO:0005231	Choline metabolism in cancer	KEGG_17.03.2017	0.0082	1	0.0081	1	[-1]	Group163	60.6061	60	[AKT1, AKT2, AKT3, CHKB, CHPT1, DGKB, DGKD, DGKQ, DGKZ, EGFR, EIF4EBP1, FOS, GPCPD1, GRB2, HIF1A, JMJD7-PLA2G4B, JUN, KRAS, LYPLA1, MAP2K1, MAPK10, MAPK3, MAPK8, MTOR, NRAS, PCYT1A, PDGFA, PDGFC, PDGFD, PDGFRA, PDGFRB, PDPK1, PIK3CA, PIK3R2, PIP5K1A, PLA2G4A, PLA2G4E, PLA2G4F, PLD2, PLPP3, PRKCA, PRKCB, PRKCG, RAC1, RAC2, RHEB, RPS6KB1, RPS6KB2, SLC22A4, SLC22A5, SLC44A1, SLC44A2, SLC44A3, SOS2, …
GO:0005231	Choline metabolism in cancer	KEGG_17.03.2017	0.0082	1	0.0018	0.24	[-1]	Group158	60.6061	60	[AKT1, AKT2, AKT3, CHKB, CHPT1, DGKB, DGKD, DGKQ, DGKZ, EGFR, EIF4EBP1, FOS, GPCPD1, GRB2, HIF1A, JMJD7-PLA2G4B, JUN, KRAS, LYPLA1, MAP2K1, MAPK10, MAPK3, MAPK8, MTOR, NRAS, PCYT1A, PDGFA, PDGFC, PDGFD, PDGFRA, PDGFRB, PDPK1, PIK3CA, PIK3R2, PIP5K1A, PLA2G4A, PLA2G4E, PLA2G4F, PLD2, PLPP3, PRKCA, PRKCB, PRKCG, RAC1, RAC2, RHEB, RPS6KB1, RPS6KB2, SLC22A4, SLC22A5, SLC44A1, SLC44A2, SLC44A3, SOS2, …
GO:0004725	Cholinergic synapse	KEGG_17.03.2017	0.18	1	0.97	1	[-1]	Group172	53.5714	60	[ACHE, ADCY1, ADCY4, ADCY6, ADCY7, ADCY9, AKT1, AKT2, AKT3, ATF4, CACNA1A, CACNA1C, CACNA1S, CAMK2A, CAMK2G, CAMK4, CHRM4, CHRNA4, CREB1, CREB3L2, CREB3L4, CREB5, FOS, GNA11, GNAI1, GNAI2, GNAI3, GNAO1, GNAQ, GNB1, GNB4, GNB5, GNG10, GNG11, GNG12, GNG13, GNG7, GNG8, ITPR1, ITPR2, ITPR3, JAK2, KCNJ12, KCNQ2, KCNQ3, KCNQ5, KRAS, MAP2K1, MAPK3, NRAS, PIK3CA, PIK3R2, PIK3R6, PLCB4, PRKACA, PRKACB, PR…
GO:0005220	Chronic myeloid leukemia	KEGG_17.03.2017	0.03	1	0.024	1	[-1]	Group171	60.5634	43	[ABL1, AKT1, AKT2, AKT3, ARAF, BAD, BCR, BRAF, CBL, CCND1, CDK6, CDKN1B, CDKN2A, CRKL, CTBP1, CTBP2, E2F3, GRB2, HDAC1, HDAC2, KRAS, MAP2K1, MAPK3, MDM2, MYC, NFKBIA, NRAS, PIK3CA, PIK3R2, PTPN11, RB1, RELA, RUNX1, SHC1, SHC4, SMAD3, SMAD4, SOS2, STAT5B, TGFB1, TGFB3, TGFBR1, TGFBR2]
GO:0004713	Circadian entrainment	KEGG_17.03.2017	0.18	1	0.97	1	[-1]	Group172	54.1667	52	[ADCY1, ADCY4, ADCY6, ADCY7, ADCY9, CACNA1C, CACNA1H, CACNA1I, CALM1, CALM2, CALM3, CALML6, CAMK2A, CAMK2G, CREB1, FOS, GNAI1, GNAI2, GNAI3, GNAO1, GNAQ, GNAS, GNB1, GNB4, GNB5, GNG10, GNG11, GNG12, GNG13, GNG7, GNG8, GRIA1, GRIA3, GRIN2A, GRIN2C, GRIN2D, GUCY1A3, ITPR1, ITPR3, KCNJ5, MAPK3, NOS1, PER1, PER2, PER3, PLCB4, PRKACA, PRKACB, PRKCA, PRKCB, PRKCG, RPS6KA5]
GO:0004713	Circadian entrainment	KEGG_17.03.2017	0.18	1	0.23	1	[-1]	Group166	54.1667	52	[ADCY1, ADCY4, ADCY6, ADCY7, ADCY9, CACNA1C, CACNA1H, CACNA1I, CALM1, CALM2, CALM3, CALML6, CAMK2A, CAMK2G, CREB1, FOS, GNAI1, GNAI2, GNAI3, GNAO1, GNAQ, GNAS, GNB1, GNB4, GNB5, GNG10, GNG11, GNG12, GNG13, GNG7, GNG8, GRIA1, GRIA3, GRIN2A, GRIN2C, GRIN2D, GUCY1A3, ITPR1, ITPR3, KCNJ5, MAPK3, NOS1, PER1, PER2, PER3, PLCB4, PRKACA, PRKACB, PRKCA, PRKCB, PRKCG, RPS6KA5]
GO:0004710	Circadian rhythm	KEGG_17.03.2017	0.029	1	0.029	1	[-1]	Group104	67.7419	21	[BHLHE40, BHLHE41, BTRC, CREB1, CRY1, CRY2, CSNK1E, FBXL3, FBXW11, PER1, PER2, PER3, PRKAA1, PRKAA2, PRKAB2, PRKAG1, PRKAG2, PRKAG3, RBX1, RORA, SKP1]
GO:0000020	Citrate cycle (TCA cycle)	KEGG_17.03.2017	0.85	1	0.85	1	[-1]	Group001	50	15	[ACO1, ACO2, CS, DLST, FH, IDH1, IDH2, MDH1, MDH2, PCK2, PDHA1, PDHB, SDHC, SDHD, SUCLG2]
GO:0005030	Cocaine addiction	KEGG_17.03.2017	1	1	0.23	1	[-1]	Group166	46.9388	23	[ATF4, CREB1, CREB3L2, CREB3L4, CREB5, FOSB, GNAI1, GNAI2, GNAI3, GNAS, GPSM1, GRIN2A, GRIN2C, GRIN2D, GRIN3B, GRM3, JUN, PRKACA, PRKACB, RELA, SLC18A1, SLC6A3, TH]
GO:0004966	Collecting duct acid secretion	KEGG_17.03.2017	1	1	0.3	1	[-1]	Group155	48.1481	13	[ATP6V0C, ATP6V0E1, ATP6V1A, ATP6V1B2, ATP6V1C1, ATP6V1C2, ATP6V1D, ATP6V1E2, ATP6V1G1, CLCNKB, SLC12A7, SLC4A1, TCIRG1]
GO:0005210	Colorectal cancer	KEGG_17.03.2017	0.013	1	0.024	1	[-1]	Group171	63.3333	38	[AKT1, AKT2, AKT3, APPL1, ARAF, AXIN1, BAD, BAX, BRAF, CASP3, CCND1, CTNNB1, CYCS, FOS, JUN, KRAS, LEF1, MAP2K1, MAPK10, MAPK3, MAPK8, MLH1, MSH2, MSH6, MYC, PIK3CA, PIK3R2, RAC1, RAC2, RHOA, SMAD2, SMAD3, SMAD4, TCF7L2, TGFB1, TGFB3, TGFBR1, TGFBR2]
GO:0004610	Complement and coagulation cascades	KEGG_17.03.2017	1	1	0.89	1	[-1]	Group170	46.8354	37	[A2M, BDKRB1, BDKRB2, C1QA, C1QB, C1QC, C1R, C2, C3, C3AR1, C4B, C5, C8B, CD46, CD55, CD59, CFB, CFD, CFH, CFI, F12, F5, F7, ITGAM, ITGAX, ITGB2, KLKB1, MASP2, PLAT, PROCR, SERPINE1, SERPING1, TFPI, THBD, VSIG4, VTN, VWF]
GO:0000270	Cysteine and methionine metabolism	KEGG_17.03.2017	0.45	1	0.45	1	[-1]	Group115	53.3333	24	[ADI1, AHCYL1, AHCYL2, AMD1, BCAT1, CBS, CDO1, CTH, DNMT1, DNMT3A, DNMT3B, ENOPH1, GCLM, GOT2, LDHA, MAT2A, MAT2B, MDH1, MDH2, MPST, MRI1, MTAP, SMS, SRM]
GO:0004060	Cytokine-cytokine receptor interaction	KEGG_17.03.2017	0.01	1	0.01	1	[-1]	Group083	39.6296	107	[ACKR3, ACVR1, AMHR2, BMP2, BMPR1A, BMPR2, CCL14, CCL15, CCL16, CCL17, CCL18, CCL19, CCL24, CCL26, CCL27, CCL3, CCL4, CCL5, CCR5, CD40, CRLF2, CSF1, CSF1R, CSF2, CSF2RA, CSF2RB, CSF3R, CX3CL1, CXCL1, CXCL14, CXCL16, CXCL2, CXCL5, CXCR1, CXCR2, CXCR4, EDA, EDAR, EGFR, EPOR, FAS, FLT4, GH1, IFNA4, IFNAR1, IFNGR1, IFNGR2, IFNL1, IFNL2, IFNLR1, IL10RB, IL11, IL13RA1, IL15RA, IL17C, IL17F, IL17RA, IL1…
GO:0004623	Cytosolic DNA-sensing pathway	KEGG_17.03.2017	0.2	1	0.43	1	[-1]	Group160	39.0625	25	[ADAR, CCL4, CCL5, DDX58, IFNA4, IL6, IRF7, MAVS, NFKBIA, NFKBIB, POLR1C, POLR1D, POLR2E, POLR2F, POLR2H, POLR2K, POLR2L, POLR3A, POLR3E, POLR3G, RELA, RIPK1, RIPK3, TMEM173, ZBP1]
GO:0000471	D-Glutamine and D-glutamate metabolism	KEGG_17.03.2017	0.35	1	0.35	1	[-1]	Group015	75	3	[GLS, GLUD1, GLUD2]
GO:0003030	DNA replication	KEGG_17.03.2017	0.24	1	0.23	1	[-1]	Group154	58.3333	21	[LIG1, MCM2, MCM3, MCM4, MCM7, PCNA, POLA1, POLD4, POLE, POLE2, POLE3, POLE4, PRIM1, PRIM2, RFC2, RNASEH1, RNASEH2B, RNASEH2C, RPA1, RPA2, RPA3]
GO:0005414	Dilated cardiomyopathy	KEGG_17.03.2017	0.52	1	0.13	1	[-1]	Group153	51.1111	46	[ACTB, ACTG1, ADCY1, ADCY4, ADCY6, ADCY7, ADCY9, ATP2A2, CACNA1C, CACNA1S, CACNA2D1, CACNA2D2, CACNG4, CACNG5, CACNG8, DAG1, DES, DMD, GNAS, IGF1, ITGA10, ITGA11, ITGA2B, ITGA5, ITGA6, ITGA7, ITGAV, ITGB1, ITGB4, ITGB5, ITGB7, ITGB8, LMNA, MYBPC3, PRKACA, PRKACB, SGCA, SGCB, SGCD, TGFB1, TGFB3, TNF, TNNI3, TPM3, TPM4, TTN]
GO:0004728	Dopaminergic synapse	KEGG_17.03.2017	0.18	1	0.97	1	[-1]	Group172	53.0769	69	[AKT1, AKT2, AKT3, ATF4, CACNA1A, CACNA1C, CALM1, CALM2, CALM3, CALML6, CALY, CAMK2A, CAMK2G, COMT, CREB1, CREB3L2, CREB3L4, CREB5, FOS, GNAI1, GNAI2, GNAI3, GNAO1, GNAQ, GNAS, GNB1, GNB4, GNB5, GNG10, GNG11, GNG12, GNG13, GNG7, GNG8, GRIA1, GRIA3, GRIN2A, GSK3A, ITPR1, ITPR2, ITPR3, KCNJ5, KIF5B, KIF5C, MAPK10, MAPK11, MAPK12, MAPK8, PLCB4, PPP1CB, PPP1CC, PPP2CA, PPP2R2A, PPP2R3A, PPP2R3C, PPP2…
GO:0004728	Dopaminergic synapse	KEGG_17.03.2017	0.18	1	0.23	1	[-1]	Group166	53.0769	69	[AKT1, AKT2, AKT3, ATF4, CACNA1A, CACNA1C, CALM1, CALM2, CALM3, CALML6, CALY, CAMK2A, CAMK2G, COMT, CREB1, CREB3L2, CREB3L4, CREB5, FOS, GNAI1, GNAI2, GNAI3, GNAO1, GNAQ, GNAS, GNB1, GNB4, GNB5, GNG10, GNG11, GNG12, GNG13, GNG7, GNG8, GRIA1, GRIA3, GRIN2A, GSK3A, ITPR1, ITPR2, ITPR3, KCNJ5, KIF5B, KIF5C, MAPK10, MAPK11, MAPK12, MAPK8, PLCB4, PPP1CB, PPP1CC, PPP2CA, PPP2R2A, PPP2R3A, PPP2R3C, PPP2…
GO:0004320	Dorso-ventral axis formation	KEGG_17.03.2017	0.18	1	0.18	1	[-1]	Group084	60.7143	17	[BRAF, CPEB3, EGFR, ETS1, ETS2, ETV6, ETV7, GRB2, KRAS, MAP2K1, MAPK3, NOTCH2, NOTCH3, PIWIL4, SOS2, SPIRE1, SPIRE2]
GO:0000982	Drug metabolism	KEGG_17.03.2017	0.0016	0.38	0.00054	0.078	[-1]	Group151	28.5714	20	[ADH1C, ALDH3B1, AOX1, CYP2B6, CYP2E1, CYP3A5, FMO1, FMO2, FMO5, GSTA4, GSTK1, GSTM3, GSTM5, GSTO1, GSTP1, GSTT1, GSTT2, GSTT2B, MGST3, UGT1A6]
GO:0000983	Drug metabolism	KEGG_17.03.2017	0.18	1	0.18	1	[-1]	Group052	36.9565	17	[CES1, DPYD, GMPS, GUSB, HPRT1, IMPDH1, IMPDH2, ITPA, NAT1, TK1, TK2, TPMT, TYMP, UCK2, UCKL1, UGT1A6, UMPS]
GO:0004512	ECM-receptor interaction	KEGG_17.03.2017	0.014	1	0.005	0.65	[-1]	Group159	60.9756	50	[AGRN, CD44, CHAD, COL1A1, COL1A2, COL2A1, COL6A1, COL6A2, COL6A3, COL9A1, COL9A2, COMP, DAG1, FN1, GP1BA, HMMR, HSPG2, IBSP, ITGA10, ITGA11, ITGA2B, ITGA5, ITGA6, ITGA7, ITGAV, ITGB1, ITGB4, ITGB5, ITGB7, ITGB8, LAMA4, LAMA5, LAMB1, LAMB2, LAMB3, LAMC1, LAMC3, RELN, SDC1, SDC4, SPP1, SV2A, THBS1, THBS2, THBS3, THBS4, TNC, TNXB, VTN, VWF]
GO:0004961	Endocrine and other factor-regulated calcium reabsorption	KEGG_17.03.2017	0.3	1	0.97	1	[-1]	Group172	55.3191	26	[ADCY6, ADCY9, AP2B1, AP2M1, AP2S1, ATP1A1, ATP1A4, ATP1B1, ATP1B2, ATP1B3, BDKRB2, CLTA, CLTB, DNM1, ESR1, GNAQ, GNAS, KL, KLK2, PLCB4, PRKACA, PRKACB, PRKCA, PRKCB, PRKCG, RAB11A]
GO:0004144	Endocytosis	KEGG_17.03.2017	0.0001	0.027	0.0001	0.015	[-1]	Group075	59.2308	154	[ACAP2, AGAP1, AGAP3, AMPH, AP2B1, AP2M1, AP2S1, ARAP1, ARAP2, ARAP3, ARF5, ARF6, ARFGAP2, ARFGAP3, ARPC1B, ARPC2, ARPC5, ASAP1, ASAP2, CAPZA2, CAPZB, CAV1, CAV2, CBL, CCR5, CDC42, CHMP1A, CHMP1B, CHMP2B, CHMP4B, CHMP5, CHMP7, CLTA, CLTB, CSF1R, CXCR1, CXCR2, CXCR4, CYTH1, CYTH2, CYTH3, DAB2, DNAJC6, DNM1, EEA1, EGFR, EHD3, EPN1, EPN2, EPS15, EPS15L1, ERBB4, FOLR1, FOLR2, FOLR3, GIT2, GRK1, GRK2,…
GO:0005213	Endometrial cancer	KEGG_17.03.2017	0.15	1	0.024	1	[-1]	Group171	58	29	[AKT1, AKT2, AKT3, ARAF, AXIN1, BAD, BRAF, CCND1, CDH1, CTNNA1, CTNNB1, EGFR, ELK1, ERBB2, FOXO3, GRB2, KRAS, LEF1, MAP2K1, MAPK3, MLH1, MYC, NRAS, PDPK1, PIK3CA, PIK3R2, PTEN, SOS2, TCF7L2]
GO:0005120	Epithelial cell signaling in Helicobacter pylori infection	KEGG_17.03.2017	0.17	1	0.17	1	[-1]	Group132	55.8824	38	[ADAM10, ATP6AP1, ATP6V0C, ATP6V0E1, ATP6V1A, ATP6V1B2, ATP6V1C1, ATP6V1C2, ATP6V1D, ATP6V1E2, ATP6V1G1, ATP6V1H, CASP3, CCL5, CDC42, CSK, CXCL1, CXCR1, CXCR2, EGFR, HBEGF, JAM2, JAM3, JUN, LYN, MAP2K4, MAPK10, MAPK11, MAPK12, MAPK8, MET, NFKBIA, PAK1, PTPN11, RAC1, RELA, TCIRG1, TJP1]
GO:0005169	Epstein-Barr virus infection	KEGG_17.03.2017	0.0033	0.78	0.0033	0.45	[-1]	Group141	57.6355	117	[ADRM1, AKT1, AKT2, AKT3, CD40, CD44, CD58, CDKN1B, CREBBP, CSNK2A1, CSNK2A2, DDX58, EIF2AK3, EIF2AK4, ENTPD1, EP300, FGR, GTF2E1, GTF2E2, HDAC1, HDAC2, HDAC5, HLA-A, HLA-B, HLA-C, HLA-DPA1, HLA-DPB1, HLA-DQA1, HLA-DQB1, HLA-DRA, HLA-DRB1, HLA-DRB3, HLA-DRB4, HLA-DRB5, HLA-E, HLA-F, HSPA1A, HSPA1B, HSPA1L, HSPB1, HSPB2, ICAM1, IL10RB, JAK3, JUN, LYN, MAP2K3, MAP2K4, MAP2K6, MAP2K7, MAP3K7, MAPK10…
GO:0004012	ErbB signaling pathway	KEGG_17.03.2017	0.016	1	0.024	1	[-1]	Group171	60.4651	52	[ABL1, ABL2, AKT1, AKT2, AKT3, ARAF, AREG, BAD, BRAF, CAMK2A, CAMK2G, CBL, CDKN1B, CRKL, EGFR, EIF4EBP1, ELK1, ERBB2, ERBB4, GAB1, GRB2, HBEGF, JUN, KRAS, MAP2K1, MAP2K4, MAP2K7, MAPK10, MAPK3, MAPK8, MTOR, MYC, NCK1, NCK2, NRAS, NRG3, PAK1, PAK2, PAK4, PAK6, PIK3CA, PIK3R2, PRKCA, PRKCB, PRKCG, PTK2, RPS6KB1, RPS6KB2, SHC1, SHC4, SOS2, STAT5B]
GO:0004915	Estrogen signaling pathway	KEGG_17.03.2017	0.032	1	0.97	1	[-1]	Group172	58.1633	57	[ADCY1, ADCY4, ADCY6, ADCY7, ADCY9, AKT1, AKT2, AKT3, ATF4, CALM1, CALM2, CALM3, CALML6, CREB1, CREB3L2, CREB3L4, CREB5, EGFR, ESR1, FKBP4, FOS, GNAI1, GNAI2, GNAI3, GNAO1, GNAQ, GNAS, GPER1, GRB2, HBEGF, HSP90AA1, HSP90AB1, HSP90B1, HSPA1A, HSPA1B, HSPA1L, ITPR1, ITPR2, ITPR3, JUN, KCNJ5, KRAS, MAP2K1, MAPK3, MMP2, NOS3, NRAS, PIK3CA, PIK3R2, PLCB4, PRKACA, PRKACB, PRKCD, SHC1, SHC4, SOS2, SP1]
GO:0000565	Ether lipid metabolism	KEGG_17.03.2017	0.76	1	0.36	1	[-1]	Group161	44.4444	20	[AGPS, CEPT1, CHPT1, JMJD7-PLA2G4B, LPCAT1, PAFAH1B1, PLA2G10, PLA2G12A, PLA2G16, PLA2G1B, PLA2G2D, PLA2G4A, PLA2G4E, PLA2G4F, PLA2G6, PLA2G7, PLD2, PLD4, PLPP3, SELENOI]
GO:0003460	Fanconi anemia pathway	KEGG_17.03.2017	0.49	1	0.49	1	[-1]	Group069	41.8182	23	[ATR, CENPS, CENPX, FANCE, FANCG, FANCL, FANCM, MLH1, MUS81, PMS2, POLH, POLI, POLK, RAD51, REV1, REV3L, RMI1, RPA1, RPA2, RPA3, TOP3B, UBE2T, USP1]
GO:0004975	Fat digestion and absorption	KEGG_17.03.2017	0.2	1	0.2	1	[-1]	Group123	36.5854	15	[ACAT2, AGPAT2, APOA1, CEL, DGAT1, GOT2, NPC1L1, PLA2G10, PLA2G12A, PLA2G1B, PLA2G2D, PLPP3, PNLIPRP1, SCARB1, SLC27A4]
GO:0000061	Fatty acid biosynthesis	KEGG_17.03.2017	0.78	1	0.78	1	[-1]	Group045	53.8462	7	[ACACA, ACACB, ACSBG2, ACSL3, ACSL4, ACSL5, MCAT]
GO:0000071	Fatty acid degradation	KEGG_17.03.2017	0.36	1	0.69	1	[-1]	Group162	54.5455	24	[ACAA1, ACAA2, ACADM, ACADSB, ACADVL, ACAT1, ACAT2, ACOX1, ACSBG2, ACSL3, ACSL4, ACSL5, ADH1C, ALDH3A2, ALDH7A1, ALDH9A1, CPT1A, CPT1C, CYP4A11, ECHS1, ECI2, HADH, HADHA, HADHB]
GO:0000062	Fatty acid elongation	KEGG_17.03.2017	0.0044	1	0.0028	0.38	[-1]	Group147	76	19	[ACAA2, ACOT1, ACOT4, ACOT7, ECHS1, ELOVL1, ELOVL3, ELOVL4, ELOVL5, HACD2, HACD3, HACD4, HADH, HADHA, HADHB, HSD17B12, PPT1, PPT2, TECR]
GO:0004664	Fc epsilon RI signaling pathway	KEGG_17.03.2017	0.11	1	0.0081	1	[-1]	Group163	57.3529	39	[AKT1, AKT2, AKT3, ALOX5, ALOX5AP, BTK, CSF2, FCER1A, FCER1G, GRB2, INPP5D, JMJD7-PLA2G4B, KRAS, LAT, LYN, MAP2K1, MAP2K3, MAP2K4, MAP2K6, MAP2K7, MAPK10, MAPK11, MAPK12, MAPK3, MAPK8, NRAS, PDPK1, PIK3CA, PIK3R2, PLA2G4A, PLA2G4E, PLA2G4F, PRKCA, RAC1, RAC2, SOS2, TNF, VAV1, VAV2]
GO:0004664	Fc epsilon RI signaling pathway	KEGG_17.03.2017	0.11	1	0.0018	0.24	[-1]	Group158	57.3529	39	[AKT1, AKT2, AKT3, ALOX5, ALOX5AP, BTK, CSF2, FCER1A, FCER1G, GRB2, INPP5D, JMJD7-PLA2G4B, KRAS, LAT, LYN, MAP2K1, MAP2K3, MAP2K4, MAP2K6, MAP2K7, MAPK10, MAPK11, MAPK12, MAPK3, MAPK8, NRAS, PDPK1, PIK3CA, PIK3R2, PLA2G4A, PLA2G4E, PLA2G4F, PRKCA, RAC1, RAC2, SOS2, TNF, VAV1, VAV2]
GO:0004666	Fc gamma R-mediated phagocytosis	KEGG_17.03.2017	0.025	1	0.0018	0.24	[-1]	Group158	59.3407	54	[AKT1, AKT2, AKT3, AMPH, ARF6, ARPC1B, ARPC2, ARPC5, ASAP1, ASAP2, CDC42, CFL2, CRKL, FCGR2A, FCGR3A, HCK, INPP5D, INPPL1, LAT, LIMK1, LYN, MAP2K1, MAPK3, MARCKS, NCF1, PAK1, PIK3CA, PIK3R2, PIP5K1A, PLA2G4A, PLA2G4E, PLA2G4F, PLA2G6, PLD2, PLPP3, PRKCA, PRKCB, PRKCD, PRKCE, PRKCG, PTPRC, RAC1, RAC2, RPS6KB1, RPS6KB2, SPHK1, SPHK2, VASP, VAV1, VAV2, WAS, WASF1, WASF3, WASL]
GO:0005418	Fluid shear stress and atherosclerosis	KEGG_17.03.2017	0.0049	1	0.0049	0.64	[-1]	Group010	59.1549	84	[ACTB, ACTG1, ACVR1, AKT1, AKT2, AKT3, ASS1, BMP4, BMPR1A, BMPR2, CALM1, CALM2, CALM3, CALML6, CAV1, CAV2, CDH5, CTNNB1, CTSL, DUSP1, EDN1, FOS, GPC1, GSTA4, GSTM3, GSTM5, GSTO1, GSTP1, GSTT1, GSTT2, GSTT2B, HMOX2, HSP90AA1, HSP90AB1, HSP90B1, ICAM1, IL1R1, ITGA2B, ITGAV, JUN, KLF2, MAP2K4, MAP2K5, MAP2K6, MAP2K7, MAP3K5, MAP3K7, MAPK10, MAPK11, MAPK12, MAPK8, MGST3, MMP2, NCF1, NCF2, NOS3, NOX1,…
GO:0004510	Focal adhesion	KEGG_17.03.2017	1.9e-05	0.0049	0.005	0.65	[-1]	Group159	62.3116	124	[ACTB, ACTG1, AKT1, AKT2, AKT3, ARHGAP5, BAD, BCAR1, BIRC2, BRAF, CAPN2, CAV1, CAV2, CCND1, CCND2, CDC42, CHAD, COL1A1, COL1A2, COL2A1, COL6A1, COL6A2, COL6A3, COL9A1, COL9A2, COMP, CRKL, CTNNB1, DIAPH1, DOCK1, EGFR, ELK1, ERBB2, FLNA, FLNB, FLNC, FLT4, FN1, GRB2, IBSP, IGF1, IGF1R, ITGA10, ITGA11, ITGA2B, ITGA5, ITGA6, ITGA7, ITGAV, ITGB1, ITGB4, ITGB5, ITGB7, ITGB8, JUN, LAMA4, LAMA5, LAMB1, LA…
GO:0000790	Folate biosynthesis	KEGG_17.03.2017	0.016	1	0.016	1	[-1]	Group043	80	12	[ALPI, ALPL, ALPPL2, DHFR, DHFR2, GCH1, GGH, GPHN, MOCS1, MOCS2, PTS, SPR]
GO:0004068	FoxO signaling pathway	KEGG_17.03.2017	0.0036	0.85	0.0036	0.48	[-1]	Group120	59.8485	79	[AKT1, AKT2, AKT3, ARAF, ATG12, ATM, BCL2L11, BCL6, BNIP3, BRAF, CAT, CCND1, CCND2, CCNG2, CDKN1B, CDKN2D, CREBBP, CSNK1E, EGFR, EP300, FBXO32, FOXO1, FOXO3, GABARAP, GABARAPL1, GABARAPL2, GADD45A, GADD45B, GADD45G, GRB2, HOMER3, IGF1, IGF1R, IL6, IL7R, INS, INSR, IRS1, IRS2, KLF2, KRAS, MAP2K1, MAPK10, MAPK11, MAPK12, MAPK3, MAPK8, MDM2, NLK, NRAS, PCK2, PDPK1, PIK3CA, PIK3R2, PLK3, PRKAA1, PRKA…
GO:0000051	Fructose and mannose metabolism	KEGG_17.03.2017	0.16	1	0.16	1	[-1]	Group022	60.6061	20	[AKR1B1, ALDOA, ALDOB, ALDOC, ENOSF1, FPGT, GMDS, GMPPA, HK1, HKDC1, MPI, PFKFB2, PFKFB3, PFKFB4, PFKM, PFKP, PMM2, SORD, TKFC, TPI1]
GO:0004727	GABAergic synapse	KEGG_17.03.2017	0.66	1	0.97	1	[-1]	Group172	50	44	[ABAT, ADCY1, ADCY4, ADCY6, ADCY7, ADCY9, CACNA1A, CACNA1C, CACNA1S, GABARAP, GABARAPL1, GABARAPL2, GABRB1, GABRB2, GABRB3, GABRD, GABRE, GABRQ, GLS, GLUL, GNAI1, GNAI2, GNAI3, GNAO1, GNB1, GNB4, GNB5, GNG10, GNG11, GNG12, GNG13, GNG7, GNG8, GPHN, HAP1, NSF, PRKACA, PRKACB, PRKCA, PRKCB, PRKCG, SLC12A5, SLC38A2, TRAK2]
GO:0000052	Galactose metabolism	KEGG_17.03.2017	0.85	1	0.57	1	[-1]	Group145	45.1613	14	[AKR1B1, B4GALT2, GAA, GALT, GANC, GLB1, HK1, HKDC1, LCT, PFKM, PFKP, PGM1, PGM2, UGP2]
GO:0004540	Gap junction	KEGG_17.03.2017	0.052	1	0.97	1	[-1]	Group172	57.9545	51	[ADCY1, ADCY4, ADCY6, ADCY7, ADCY9, EGFR, GJA1, GJD2, GNA11, GNAI1, GNAI2, GNAI3, GNAQ, GNAS, GRB2, GUCY1A3, HTR2A, ITPR1, ITPR2, ITPR3, KRAS, LPAR1, MAP2K1, MAP2K5, MAP3K2, MAPK3, NRAS, PDGFA, PDGFC, PDGFD, PDGFRA, PDGFRB, PLCB4, PRKACA, PRKACB, PRKCA, PRKCB, PRKCG, SOS2, TJP1, TUBA1B, TUBA1C, TUBA3C, TUBA8, TUBB, TUBB2A, TUBB2B, TUBB3, TUBB4A, TUBB4B, TUBB6]
GO:0004971	Gastric acid secretion	KEGG_17.03.2017	0.56	1	0.97	1	[-1]	Group172	50.6667	38	[ACTB, ADCY1, ADCY4, ADCY6, ADCY7, ADCY9, ATP1A1, ATP1A4, ATP1B1, ATP1B2, ATP1B3, CALM1, CALM2, CALM3, CALML6, CAMK2A, CAMK2G, EZR, GAST, GNAI1, GNAI2, GNAI3, GNAQ, GNAS, HRH2, ITPR1, ITPR2, ITPR3, KCNJ15, KCNK2, MYLK, PLCB4, PRKACA, PRKACB, PRKCA, PRKCB, PRKCG, SSTR2]
GO:0005214	Glioma	KEGG_17.03.2017	0.058	1	0.024	1	[-1]	Group171	59.375	38	[AKT1, AKT2, AKT3, ARAF, BRAF, CALM1, CALM2, CALM3, CALML6, CAMK2A, CAMK2G, CCND1, CDK6, CDKN2A, E2F3, EGFR, GRB2, IGF1, IGF1R, KRAS, MAP2K1, MAPK3, MDM2, MTOR, NRAS, PDGFA, PDGFRA, PDGFRB, PIK3CA, PIK3R2, PRKCA, PRKCB, PRKCG, PTEN, RB1, SHC1, SHC4, SOS2]
GO:0004922	Glucagon signaling pathway	KEGG_17.03.2017	0.16	1	0.16	1	[-1]	Group113	54.3689	56	[ACACA, ACACB, AKT1, AKT2, AKT3, ATF4, CALM1, CALM2, CALM3, CALML6, CAMK2A, CAMK2G, CPT1A, CPT1C, CREB1, CREB3L2, CREB3L4, CREB5, CREBBP, CRTC2, EP300, FOXO1, GCGR, GNAQ, GNAS, ITPR1, ITPR2, ITPR3, LDHA, PCK2, PDE3B, PDHA1, PDHB, PGAM1, PGAM4, PHKB, PKM, PLCB4, PPARGC1A, PPP3CA, PPP3CB, PPP3CC, PPP4C, PPP4R3B, PRKAA1, PRKAA2, PRKAB2, PRKACA, PRKACB, PRKAG1, PRKAG2, PRKAG3, PRMT1, SIK1, SIK2, SLC2…
GO:0004724	Glutamatergic synapse	KEGG_17.03.2017	0.25	1	0.97	1	[-1]	Group172	52.6316	60	[ADCY1, ADCY4, ADCY6, ADCY7, ADCY9, CACNA1A, CACNA1C, GLS, GLUL, GNAI1, GNAI2, GNAI3, GNAO1, GNAQ, GNAS, GNB1, GNB4, GNB5, GNG10, GNG11, GNG12, GNG13, GNG7, GNG8, GRIA1, GRIA3, GRIK2, GRIK3, GRIN2A, GRIN2C, GRIN2D, GRIN3B, GRK2, GRK3, GRM3, GRM7, HOMER3, ITPR1, ITPR2, ITPR3, JMJD7-PLA2G4B, MAPK3, PLA2G4A, PLA2G4E, PLA2G4F, PLCB4, PLD2, PPP3CA, PPP3CB, PPP3CC, PRKACA, PRKACB, PRKCA, PRKCB, PRKCG, …
GO:0000480	Glutathione metabolism	KEGG_17.03.2017	0.099	1	0.099	1	[-1]	Group016	59.2593	32	[ANPEP, GCLM, GGCT, GGT1, GGT7, GPX1, GPX2, GPX3, GPX5, GPX6, GPX7, GPX8, GSTA4, GSTK1, GSTM3, GSTM5, GSTO1, GSTP1, GSTT1, GSTT2, GSTT2B, IDH1, IDH2, LAP3, MGST3, NAT8B, ODC1, PGD, RRM1, RRM2B, SMS, SRM]
GO:0000561	Glycerolipid metabolism	KEGG_17.03.2017	0.89	1	0.89	1	[-1]	Group030	45.7627	27	[AGPAT2, AGPAT4, AGPAT5, AKR1A1, AKR1B1, ALDH3A2, ALDH7A1, ALDH9A1, CEL, DGAT1, DGKB, DGKD, DGKQ, DGKZ, GPAT2, LCLAT1, LIPG, LPIN1, LPL, MBOAT1, MGLL, MOGAT1, PLPP3, PNLIPRP1, PNPLA2, PNPLA3, TKFC]
GO:0000564	Glycerophospholipid metabolism	KEGG_17.03.2017	0.53	1	0.36	1	[-1]	Group161	50.5263	48	[ACHE, ADPRM, AGPAT2, AGPAT4, AGPAT5, CDS2, CEPT1, CHKB, CHPT1, CRLS1, DGKB, DGKD, DGKQ, DGKZ, ETNK1, ETNK2, GNPAT, GPAT2, GPCPD1, GPD2, JMJD7-PLA2G4B, LCLAT1, LPCAT1, LPIN1, LYPLA1, LYPLA2, MBOAT1, MBOAT7, PCYT1A, PCYT2, PGS1, PHOSPHO1, PLA2G10, PLA2G12A, PLA2G15, PLA2G16, PLA2G1B, PLA2G2D, PLA2G4A, PLA2G4E, PLA2G4F, PLA2G6, PLD2, PLD4, PLPP3, PTDSS1, PTDSS2, SELENOI]
GO:0000260	Glycine, serine and threonine metabolism	KEGG_17.03.2017	0.079	1	0.079	1	[-1]	Group111	32.5	13	[ALDH7A1, AMT, AOC3, BPGM, CBS, CHDH, CTH, GAMT, GCSH, PGAM1, PGAM4, PIPOX, PSPH]
GO:0000010	Glycolysis / Gluconeogenesis	KEGG_17.03.2017	1	1	1	1	[-1]	Group000	47.7612	32	[ACSS1, ADH1C, AKR1A1, ALDH3A2, ALDH3B1, ALDH7A1, ALDH9A1, ALDOA, ALDOB, ALDOC, BPGM, ENO1, ENO2, GAPDH, GPI, HK1, HKDC1, LDHA, MINPP1, PCK2, PDHA1, PDHB, PFKM, PFKP, PGAM1, PGAM4, PGK1, PGM1, PGM2, PKLR, PKM, TPI1]
GO:0000534	Glycosaminoglycan biosynthesis	KEGG_17.03.2017	0.83	1	0.83	1	[-1]	Group029	50	12	[B4GALT7, EXT1, EXT2, EXTL1, EXTL2, HS2ST1, HS3ST3B1, HS6ST1, HS6ST3, NDST1, XYLT1, XYLT2]
GO:0000533	Glycosaminoglycan biosynthesis	KEGG_17.03.2017	0.1	1	0.1	1	[-1]	Group027	71.4286	10	[B3GNT2, B3GNT7, B4GALT2, B4GALT3, CHST1, CHST2, CHST6, FUT8, ST3GAL1, ST3GAL2]
GO:0000532	Glycosaminoglycan biosynthesis	KEGG_17.03.2017	0.045	1	0.045	1	[-1]	Group026	70	14	[B4GALT7, CHPF, CHST11, CHST12, CHST13, CHST15, CHST3, CHSY1, CHSY3, CSGALNACT1, CSGALNACT2, DSE, XYLT1, XYLT2]
GO:0000531	Glycosaminoglycan degradation	KEGG_17.03.2017	0.81	1	0.81	1	[-1]	Group025	42.1053	8	[GLB1, GNS, GUSB, HEXA, HGSNAT, HPSE2, HYAL4, IDS]
GO:0000604	Glycosphingolipid biosynthesis	KEGG_17.03.2017	0.19	1	1	1	[-1]	Group146	66.6667	10	[B3GALT4, B4GALNT1, GLB1, HEXA, SLC33A1, ST3GAL1, ST3GAL2, ST6GALNAC4, ST6GALNAC6, ST8SIA1]
GO:0000603	Glycosphingolipid biosynthesis	KEGG_17.03.2017	0.61	1	1	1	[-1]	Group146	40	6	[A4GALT, HEXA, NAGA, ST3GAL1, ST3GAL2, ST8SIA1]
GO:0000601	Glycosphingolipid biosynthesis	KEGG_17.03.2017	0.17	1	0.17	1	[-1]	Group033	33.3333	9	[A4GALT, ABO, B3GNT2, B3GNT5, B4GALT2, B4GALT3, FUT4, FUT6, ST8SIA1]
GO:0000563	Glycosylphosphatidylinositol (GPI)-anchor biosynthesis	KEGG_17.03.2017	0.42	1	0.42	1	[-1]	Group031	56	14	[GPAA1, PGAP1, PIGA, PIGB, PIGG, PIGH, PIGK, PIGL, PIGN, PIGP, PIGS, PIGT, PIGU, PIGX]
GO:0000630	Glyoxylate and dicarboxylate metabolism	KEGG_17.03.2017	0.18	1	0.18	1	[-1]	Group035	60.7143	17	[ACAT1, ACAT2, ACO1, ACO2, AMT, CAT, CS, GCSH, GLUL, HAO1, MCEE, MDH1, MDH2, MUT, PCCA, PCCB, PGP]
GO:0004912	GnRH signaling pathway	KEGG_17.03.2017	0.0059	1	0.97	1	[-1]	Group172	61.9565	57	[ADCY1, ADCY4, ADCY6, ADCY7, ADCY9, ATF4, CACNA1C, CACNA1S, CALM1, CALM2, CALM3, CALML6, CAMK2A, CAMK2G, CDC42, EGFR, ELK1, GNA11, GNAQ, GNAS, GNRH1, GRB2, HBEGF, ITPR1, ITPR2, ITPR3, JMJD7-PLA2G4B, JUN, KRAS, LHB, MAP2K1, MAP2K3, MAP2K4, MAP2K6, MAP2K7, MAP3K1, MAP3K2, MAP3K3, MAPK10, MAPK11, MAPK12, MAPK3, MAPK8, MMP2, NRAS, PLA2G4A, PLA2G4E, PLA2G4F, PLCB4, PLD2, PRKACA, PRKACB, PRKCA, PRKCB, …
GO:0005332	Graft-versus-host disease	KEGG_17.03.2017	0.16	1	0.89	1	[-1]	Group170	58.5366	24	[CD28, FAS, GZMB, HLA-A, HLA-B, HLA-C, HLA-DMA, HLA-DMB, HLA-DOA, HLA-DPA1, HLA-DPB1, HLA-DQA1, HLA-DQB1, HLA-DRA, HLA-DRB1, HLA-DRB3, HLA-DRB4, HLA-DRB5, HLA-E, HLA-F, IL6, KIR2DL5A, KIR3DL1, TNF]
GO:0004066	HIF-1 signaling pathway	KEGG_17.03.2017	0.0047	1	0.0047	0.62	[-1]	Group109	61.3861	62	[AKT1, AKT2, AKT3, ALDOA, ANGPT1, ANGPT4, CAMK2A, CAMK2G, CDKN1B, CREBBP, CUL2, EDN1, EGFR, EGLN1, EGLN3, EIF4E, EIF4E2, EIF4EBP1, ELOC, ENO1, ENO2, EP300, ERBB2, GAPDH, HIF1A, HK1, HKDC1, IFNGR1, IFNGR2, IGF1, IGF1R, IL6, INS, INSR, LDHA, MAP2K1, MAPK3, MKNK2, MTOR, NOS2, NOS3, NOX1, PDHA1, PDHB, PDK1, PFKFB3, PGK1, PIK3CA, PIK3R2, PRKCA, PRKCB, PRKCG, RBX1, RELA, RPS6, RPS6KB1, RPS6KB2, SERPINE…
GO:0005166	HTLV-I infection	KEGG_17.03.2017	7.7e-07	0.0002	7.7e-07	0.00012	[-1]	Group140	62.5	160	[ADCY1, ADCY4, ADCY6, ADCY7, ADCY9, AKT1, AKT2, AKT3, ANAPC1, ANAPC10, ANAPC11, ANAPC2, ANAPC4, ATF1, ATF3, ATF4, ATM, ATR, BAX, BUB3, CALR, CANX, CCND1, CCND2, CD3D, CD3E, CD3G, CD40, CDC16, CDC23, CDC26, CDC27, CDKN2A, CDKN2C, CREB1, CREBBP, CREM, CRTC1, CRTC2, CRTC3, CSF2, CTNNB1, DLG1, DVL1, E2F3, EGR1, EGR2, ELK1, EP300, ETS1, ETS2, FDPS, FOS, FZD1, FZD10, FZD5, FZD6, FZD7, FZD8, FZD9, GPS2,…
GO:0004340	Hedgehog signaling pathway	KEGG_17.03.2017	0.3	1	0.3	1	[-1]	Group087	55.3191	26	[BOC, BTRC, CCND1, CCND2, CDON, CSNK1A1, CSNK1E, CSNK1G1, CUL3, EVC, FBXW11, GAS1, GLI1, GLI3, GPR161, GRK2, GRK3, HHIP, KIF3A, PRKACA, PRKACB, SHH, SMURF2, SPOP, SPOPL, SUFU]
GO:0004640	Hematopoietic cell lineage	KEGG_17.03.2017	0.3	1	0.3	1	[-1]	Group100	52.5773	51	[ANPEP, CD14, CD1B, CD2, CD24, CD33, CD34, CD37, CD3D, CD3E, CD3G, CD4, CD44, CD55, CD59, CD8A, CD8B, CD9, CSF1, CSF1R, CSF2, CSF2RA, CSF3R, EPOR, GP1BA, HLA-DMA, HLA-DMB, HLA-DOA, HLA-DPA1, HLA-DPB1, HLA-DQA1, HLA-DQB1, HLA-DRA, HLA-DRB1, HLA-DRB3, HLA-DRB4, HLA-DRB5, IL11, IL1R1, IL4R, IL6, IL7R, IL9R, ITGA2B, ITGA5, ITGA6, ITGAM, KIT, KITLG, MME, TNF]
GO:0005161	Hepatitis B	KEGG_17.03.2017	0.2	1	0.024	1	[-1]	Group171	52.7778	76	[AKT1, AKT2, AKT3, ATF4, ATP6AP1, BAD, BAX, CASP10, CASP3, CCND1, CCNE2, CDK6, CDKN1B, CREB1, CREB3L2, CREB3L4, CREB5, CREBBP, CYCS, DDB1, DDB2, DDX3X, DDX58, E2F3, EGR2, ELK1, EP300, FAS, FOS, GRB2, HSPG2, IFNA4, IFNAR1, IL6, IRF7, JUN, KRAS, LAMTOR5, MAP2K1, MAP2K4, MAP3K1, MAPK10, MAPK3, MAPK8, MAVS, MYC, NFATC1, NFATC2, NFATC4, NFKBIA, NRAS, PCNA, PIK3CA, PIK3R2, PRKCA, PRKCB, PRKCG, PTEN, PT…
GO:0005160	Hepatitis C	KEGG_17.03.2017	0.53	1	0.53	1	[-1]	Group139	44.2748	58	[AKT1, AKT2, AKT3, ARAF, BAD, BRAF, CD81, CLDN11, CLDN15, CLDN18, CLDN19, CLDN22, CLDN23, CLDN25, CLDN4, DDX58, EGFR, EIF2AK3, EIF2AK4, EIF2S1, EIF3E, GRB2, IFIT1, IFNA4, IFNAR1, IRF7, KRAS, LDLR, MAPK10, MAPK11, MAPK12, MAPK3, MAPK8, MAVS, NFKBIA, NRAS, OAS1, OAS2, OAS3, PDPK1, PIAS1, PIK3CA, PIK3R2, PPP2CA, PPP2R2A, RELA, RIPK1, RNASEL, SCARB1, SOCS3, SOS2, STAT1, STAT2, STAT3, TICAM1, TNF, TRA…
GO:0005168	Herpes simplex infection	KEGG_17.03.2017	0.11	1	0.0033	0.44	[-1]	Group167	52.973	98	[ALYREF, C3, C5, CASP3, CCL5, CD74, CFP, CREBBP, CSNK2A1, CSNK2A2, CYCS, DDX58, EEF1D, EIF2AK3, EIF2AK4, EIF2S1, EP300, FAS, FOS, GTF2I, HCFC2, HLA-A, HLA-B, HLA-C, HLA-DMA, HLA-DMB, HLA-DOA, HLA-DPA1, HLA-DPB1, HLA-DQA1, HLA-DQB1, HLA-DRA, HLA-DRB1, HLA-DRB3, HLA-DRB4, HLA-DRB5, HLA-E, HLA-F, HMGN1, HNRNPK, IFIT1, IFNA4, IFNAR1, IFNGR1, IFNGR2, IL6, IRF7, JAK2, JUN, MAP3K7, MAPK10, MAPK8, MAVS, …
GO:0004390	Hippo signaling pathway	KEGG_17.03.2017	0.072	1	0.072	1	[-1]	Group090	54.5455	84	[ACTB, ACTG1, AMOT, AREG, AXIN1, BIRC2, BMP2, BMP4, BMP6, BMP8B, BMPR1A, BMPR2, BTRC, CCND1, CCND2, CDH1, CSNK1E, CTNNA1, CTNNB1, DLG1, DLG3, DVL1, FBXW11, FGF1, FRMD1, FRMD6, FZD1, FZD10, FZD5, FZD6, FZD7, FZD8, FZD9, GDF6, ID1, ID2, ITGB2, LEF1, LIMD1, LLGL2, MOB1A, MOB1B, MPP5, MYC, NF2, PARD3, PARD6G, PATJ, PPP1CB, PPP1CC, PPP2CA, PPP2R2A, PRKCI, PRKCZ, RASSF1, SCRIB, SERPINE1, SMAD2, SMAD3, …
GO:0004392	Hippo signaling pathway -multiple species	KEGG_17.03.2017	0.13	1	0.13	1	[-1]	Group091	62.069	18	[CSNK1E, DCHS2, FAT4, FRMD1, FRMD6, LIMD1, MOB1A, MOB1B, NF2, PAK1, RASSF1, RASSF2, STK3, TEAD3, TEAD4, WTIP, WWTR1, YAP1]
GO:0000340	Histidine metabolism	KEGG_17.03.2017	0.21	1	0.033	1	[-1]	Group157	33.3333	8	[ALDH3A2, ALDH3B1, ALDH7A1, ALDH9A1, AMDHD1, AOC1, CARNS1, FTCD]
GO:0003440	Homologous recombination	KEGG_17.03.2017	0.53	1	0.53	1	[-1]	Group066	41.4634	17	[ATM, BABAM1, BRCC3, FAM175A, MUS81, NBN, POLD4, RAD50, RAD51, RAD51D, RPA1, RPA2, RPA3, SHFM1, TOP3B, UIMC1, XRCC3]
GO:0005016	Huntington's disease	KEGG_17.03.2017	0.0067	1	6.9e-05	0.01	[-1]	Group165	56.9948	110	[AP2B1, AP2M1, AP2S1, ATP5A1, ATP5C1, ATP5E, ATP5F1, ATP5G1, ATP5G2, ATP5G3, ATP5H, ATP5J, ATP5O, BAX, CASP3, CLTA, CLTB, COX4I1, COX4I2, COX6A1, COX6A2, COX6B1, COX6B2, COX6C, COX7A1, COX7A2, COX7A2L, COX7B, COX7C, COX8A, CREB1, CREB3L2, CREB3L4, CREB5, CREBBP, CYCS, DCTN1, DCTN4, DNAH10, DNAH2, DNAL4, DNALI1, EP300, GNAQ, GPX1, HAP1, HDAC1, HDAC2, HIP1, ITPR1, NDUFA1, NDUFA10, NDUFA11, NDUFA12,…
GO:0005410	Hypertrophic cardiomyopathy (HCM)	KEGG_17.03.2017	0.15	1	0.13	1	[-1]	Group153	55.4217	46	[ACE, ACTB, ACTG1, ATP2A2, CACNA1C, CACNA1S, CACNA2D1, CACNA2D2, CACNG4, CACNG5, CACNG8, DAG1, DES, DMD, IGF1, IL6, ITGA10, ITGA11, ITGA2B, ITGA5, ITGA6, ITGA7, ITGAV, ITGB1, ITGB4, ITGB5, ITGB7, ITGB8, LMNA, MYBPC3, PRKAA1, PRKAA2, PRKAB2, PRKAG1, PRKAG2, PRKAG3, SGCA, SGCB, SGCD, TGFB1, TGFB3, TNF, TNNI3, TPM3, TPM4, TTN]
GO:0004657	IL-17 signaling pathway	KEGG_17.03.2017	1	1	0.072	1	[-1]	Group164	47.3118	44	[CASP3, CCL17, CEBPB, CSF2, CXCL1, CXCL2, CXCL5, DEFB4A, ELAVL1, FOS, FOSB, HSP90AA1, HSP90AB1, HSP90B1, IL17C, IL17F, IL17RA, IL17RB, IL17RC, IL6, JUN, MAP3K7, MAPK10, MAPK11, MAPK12, MAPK3, MAPK4, MAPK6, MAPK8, MMP1, MMP13, MUC5AC, NFKBIA, PTGS2, RELA, S100A8, SRSF1, TAB2, TNF, TRADD, TRAF2, TRAF3IP2, TRAF4, TRAF5]
GO:0005321	Inflammatory bowel disease (IBD)	KEGG_17.03.2017	0.45	1	0.89	1	[-1]	Group170	52.3077	34	[FOXP3, HLA-DMA, HLA-DMB, HLA-DOA, HLA-DPA1, HLA-DPB1, HLA-DQA1, HLA-DQB1, HLA-DRA, HLA-DRB1, HLA-DRB3, HLA-DRB4, HLA-DRB5, IFNGR1, IFNGR2, IL17F, IL2RG, IL4R, IL6, JUN, NFATC1, NOD2, RELA, RORA, SMAD2, SMAD3, STAT1, STAT3, STAT6, TBX21, TGFB1, TGFB3, TLR5, TNF]
GO:0005321	Inflammatory bowel disease (IBD)	KEGG_17.03.2017	0.45	1	0.013	1	[-1]	Group168	52.3077	34	[FOXP3, HLA-DMA, HLA-DMB, HLA-DOA, HLA-DPA1, HLA-DPB1, HLA-DQA1, HLA-DQB1, HLA-DRA, HLA-DRB1, HLA-DRB3, HLA-DRB4, HLA-DRB5, IFNGR1, IFNGR2, IL17F, IL2RG, IL4R, IL6, JUN, NFATC1, NOD2, RELA, RORA, SMAD2, SMAD3, STAT1, STAT3, STAT6, TBX21, TGFB1, TGFB3, TLR5, TNF]
GO:0004750	Inflammatory mediator regulation of TRP channels	KEGG_17.03.2017	0.1	1	0.97	1	[-1]	Group172	55.6701	54	[ADCY1, ADCY4, ADCY6, ADCY7, ADCY9, ASIC4, BDKRB1, BDKRB2, CALM1, CALM2, CALM3, CALML6, CAMK2A, CAMK2G, GNAQ, GNAS, HRH1, HTR2A, IGF1, IL1R1, IL1RAP, ITPR1, ITPR2, ITPR3, JMJD7-PLA2G4B, MAP2K3, MAP2K6, MAPK10, MAPK11, MAPK12, MAPK8, P2RY2, PIK3CA, PIK3R2, PLA2G4A, PLA2G4E, PLA2G4F, PLA2G6, PLCB4, PPP1CB, PPP1CC, PRKACA, PRKACB, PRKCA, PRKCB, PRKCD, PRKCE, PRKCG, PRKCQ, PTGER2, PTGER4, TRPA1, TRPV…
GO:0005164	Influenza A	KEGG_17.03.2017	0.12	1	0.0033	0.44	[-1]	Group167	53.1792	92	[ACTB, ACTG1, ADAR, AGFG1, AKT1, AKT2, AKT3, CCL5, CPSF4, CREBBP, CYCS, DDX58, DNAJB1, DNAJC3, EIF2AK3, EIF2AK4, EIF2S1, EP300, FAS, FDPS, HLA-DMA, HLA-DMB, HLA-DOA, HLA-DPA1, HLA-DPB1, HLA-DQA1, HLA-DQB1, HLA-DRA, HLA-DRB1, HLA-DRB3, HLA-DRB4, HLA-DRB5, HSPA1A, HSPA1B, HSPA1L, ICAM1, IFNA4, IFNAR1, IFNGR1, IFNGR2, IL6, IRAK4, IRF7, IVNS1ABP, JAK2, JUN, MAP2K1, MAP2K3, MAP2K4, MAP2K6, MAP2K7, MAP…
GO:0000562	Inositol phosphate metabolism	KEGG_17.03.2017	0.47	1	0.14	1	[-1]	Group150	52.1127	37	[ALDH6A1, IMPA1, IMPA2, IMPAD1, INPP5D, INPP5E, INPP5J, INPP5K, INPPL1, IPPK, ITPK1, ITPKB, MINPP1, MIOX, MTM1, MTMR14, MTMR2, MTMR4, MTMR6, MTMR8, OCRL, PI4K2B, PI4KA, PIK3C2A, PIK3C2G, PIK3C3, PIK3CA, PIKFYVE, PIP4K2A, PIP4K2B, PIP5K1A, PLCB4, PLCD4, PLCH1, PTEN, SYNJ2, TPI1]
GO:0004931	Insulin resistance	KEGG_17.03.2017	0.0032	0.76	0.00036	0.053	[-1]	Group169	61.6822	66	[ACACB, AKT1, AKT2, AKT3, CPT1A, CREB1, CREB3L2, CREB3L4, CREB5, CRTC2, FOXO1, GFPT1, GFPT2, IL6, INS, INSR, IRS1, IRS2, MAPK10, MAPK8, MGEA5, MLXIP, MLXIPL, MTOR, NFKBIA, NOS3, NR1H2, OGT, PCK2, PDPK1, PIK3CA, PIK3R2, PPARGC1A, PPP1CB, PPP1CC, PPP1R3B, PPP1R3C, PPP1R3E, PRKAA1, PRKAA2, PRKAB2, PRKAG1, PRKAG2, PRKAG3, PRKCB, PRKCD, PRKCE, PRKCQ, PRKCZ, PTEN, PTPN1, PTPN11, PTPRF, RELA, RPS6KA1, R…
GO:0004911	Insulin secretion	KEGG_17.03.2017	0.74	1	0.97	1	[-1]	Group172	49.4118	42	[ABCC8, ADCY1, ADCY4, ADCY6, ADCY7, ADCY9, ATF4, ATP1A1, ATP1A4, ATP1B1, ATP1B2, ATP1B3, CACNA1C, CACNA1S, CAMK2A, CAMK2G, CREB1, CREB3L2, CREB3L4, CREB5, GNA11, GNAQ, GNAS, GPR119, INS, ITPR3, KCNMB2, KCNMB4, KCNN2, KCNN4, PLCB4, PRKACA, PRKACB, PRKCA, PRKCB, PRKCG, RAPGEF4, RIMS2, SLC2A1, SNAP25, STX1A, VAMP2]
GO:0004910	Insulin signaling pathway	KEGG_17.03.2017	0.00074	0.18	0.00036	0.053	[-1]	Group169	61.5942	85	[ACACA, ACACB, AKT1, AKT2, AKT3, ARAF, BAD, BRAF, CALM1, CALM2, CALM3, CALML6, CBL, CRKL, EIF4E, EIF4E2, EIF4EBP1, ELK1, EXOC7, FLOT2, FOXO1, GRB2, HK1, HKDC1, INPP5K, INPPL1, INS, INSR, IRS1, IRS2, KRAS, MAP2K1, MAPK10, MAPK3, MAPK8, MKNK2, MTOR, NRAS, PCK2, PDE3B, PDPK1, PHKB, PIK3CA, PIK3R2, PKLR, PPARGC1A, PPP1CB, PPP1CC, PPP1R3B, PPP1R3C, PPP1R3E, PPP1R3F, PRKAA1, PRKAA2, PRKAB2, PRKACA, PRK…
GO:0004672	Intestinal immune network for IgA production	KEGG_17.03.2017	0.77	1	0.89	1	[-1]	Group170	44.898	22	[AICDA, CD28, CD40, CXCR4, HLA-DMA, HLA-DMB, HLA-DOA, HLA-DPA1, HLA-DPB1, HLA-DQA1, HLA-DQB1, HLA-DRA, HLA-DRB1, HLA-DRB3, HLA-DRB4, HLA-DRB5, IL15RA, IL6, ITGB7, PIGR, TGFB1, TNFSF13B]
GO:0004630	Jak-STAT signaling pathway	KEGG_17.03.2017	0.12	1	0.12	1	[-1]	Group099	41.0256	64	[AKT1, AKT2, AKT3, AOX1, CCND1, CCND2, CREBBP, CRLF2, CSF2, CSF2RA, CSF2RB, CSF3R, EP300, EPOR, FHL1, GFAP, GH1, GRB2, IFNA4, IFNAR1, IFNGR1, IFNGR2, IFNL1, IFNL2, IFNLR1, IL10RB, IL11, IL13RA1, IL15RA, IL22RA2, IL24, IL2RG, IL4R, IL6, IL6ST, IL7R, IL9R, JAK2, JAK3, LEPR, LIFR, MCL1, MTOR, MYC, PIAS1, PIAS2, PIK3CA, PIK3R2, PIM1, PTPN11, PTPN2, PTPN6, SOCS1, SOCS3, SOCS4, SOCS5, SOS2, STAM, STAM2…
GO:0005134	Legionellosis	KEGG_17.03.2017	0.28	1	0.28	1	[-1]	Group135	54.5455	30	[BCL2L13, BNIP3, C3, CASP3, CASP7, CD14, CLK1, CXCL1, CXCL2, CYCS, EEF1A1, EEF1G, HBS1L, HSF1, HSPA1A, HSPA1B, HSPA1L, HSPD1, IL6, ITGAM, ITGB2, NAIP, NFKBIA, RAB1A, RAB1B, RELA, SAR1A, SAR1B, TLR5, TNF]
GO:0005140	Leishmaniasis	KEGG_17.03.2017	0.033	1	0.89	1	[-1]	Group170	60.274	44	[C3, ELK1, FCGR2A, FCGR2C, FCGR3A, FOS, HLA-DMA, HLA-DMB, HLA-DOA, HLA-DPA1, HLA-DPB1, HLA-DQA1, HLA-DQB1, HLA-DRA, HLA-DRB1, HLA-DRB3, HLA-DRB4, HLA-DRB5, IFNGR1, IFNGR2, IRAK4, ITGAM, ITGB1, ITGB2, JAK2, JUN, MAP3K7, MAPK11, MAPK12, MAPK3, NCF1, NCF2, NFKBIA, NFKBIB, NOS2, PRKCB, PTGS2, PTPN6, RELA, STAT1, TAB2, TGFB1, TGFB3, TNF]
GO:0005140	Leishmaniasis	KEGG_17.03.2017	0.033	1	0.013	1	[-1]	Group168	60.274	44	[C3, ELK1, FCGR2A, FCGR2C, FCGR3A, FOS, HLA-DMA, HLA-DMB, HLA-DOA, HLA-DPA1, HLA-DPB1, HLA-DQA1, HLA-DQB1, HLA-DRA, HLA-DRB1, HLA-DRB3, HLA-DRB4, HLA-DRB5, IFNGR1, IFNGR2, IRAK4, ITGAM, ITGB1, ITGB2, JAK2, JUN, MAP3K7, MAPK11, MAPK12, MAPK3, NCF1, NCF2, NFKBIA, NFKBIB, NOS2, PRKCB, PTGS2, PTPN6, RELA, STAT1, TAB2, TGFB1, TGFB3, TNF]
GO:0005140	Leishmaniasis	KEGG_17.03.2017	0.033	1	0.0033	0.44	[-1]	Group167	60.274	44	[C3, ELK1, FCGR2A, FCGR2C, FCGR3A, FOS, HLA-DMA, HLA-DMB, HLA-DOA, HLA-DPA1, HLA-DPB1, HLA-DQA1, HLA-DQB1, HLA-DRA, HLA-DRB1, HLA-DRB3, HLA-DRB4, HLA-DRB5, IFNGR1, IFNGR2, IRAK4, ITGAM, ITGB1, ITGB2, JAK2, JUN, MAP3K7, MAPK11, MAPK12, MAPK3, NCF1, NCF2, NFKBIA, NFKBIB, NOS2, PRKCB, PTGS2, PTPN6, RELA, STAT1, TAB2, TGFB1, TGFB3, TNF]
GO:0004670	Leukocyte transendothelial migration	KEGG_17.03.2017	0.058	1	0.058	1	[-1]	Group103	56.1404	64	[ACTB, ACTG1, AFDN, ARHGAP5, BCAR1, CD99, CDC42, CDH5, CLDN11, CLDN15, CLDN18, CLDN19, CLDN22, CLDN23, CLDN25, CLDN4, CTNNA1, CTNNB1, CTNND1, CXCR4, ESAM, EZR, GNAI1, GNAI2, GNAI3, ICAM1, ITGAM, ITGB1, ITGB2, JAM2, JAM3, MAPK11, MAPK12, MMP2, MSN, MYL12A, MYL12B, MYL9, NCF1, NCF2, NOX1, PECAM1, PIK3CA, PIK3R2, PRKCA, PRKCB, PRKCG, PTK2, PTK2B, PTPN11, RAC1, RAC2, RAP1A, RAP1B, RAPGEF4, RHOA, ROCK…
GO:0000591	Linoleic acid metabolism	KEGG_17.03.2017	0.57	1	0.36	1	[-1]	Group161	41.3793	12	[ALOX15, CYP2E1, JMJD7-PLA2G4B, PLA2G10, PLA2G12A, PLA2G16, PLA2G1B, PLA2G2D, PLA2G4A, PLA2G4E, PLA2G4F, PLA2G6]
GO:0004730	Long-term depression	KEGG_17.03.2017	0.013	1	0.97	1	[-1]	Group172	63.3333	38	[ARAF, BRAF, CACNA1A, CRH, CRHR1, GNA11, GNA12, GNA13, GNAI1, GNAI2, GNAI3, GNAO1, GNAQ, GNAS, GRIA1, GRIA3, GRID2, GUCY1A3, IGF1, IGF1R, ITPR1, ITPR2, ITPR3, JMJD7-PLA2G4B, KRAS, LYN, MAP2K1, MAPK3, NOS1, NRAS, PLA2G4A, PLA2G4E, PLA2G4F, PLCB4, PPP2CA, PRKCA, PRKCB, PRKCG]
GO:0004720	Long-term potentiation	KEGG_17.03.2017	0.013	1	0.97	1	[-1]	Group172	62.6866	42	[ADCY1, ARAF, ATF4, BRAF, CACNA1C, CALM1, CALM2, CALM3, CALML6, CAMK2A, CAMK2G, CAMK4, CREBBP, EP300, GNAQ, GRIA1, GRIN2A, GRIN2C, GRIN2D, ITPR1, ITPR2, ITPR3, KRAS, MAP2K1, MAPK3, NRAS, PLCB4, PPP1CB, PPP1CC, PPP3CA, PPP3CB, PPP3CC, PRKACA, PRKACB, PRKCA, PRKCB, PRKCG, RAP1A, RAP1B, RPS6KA1, RPS6KA2, RPS6KA3]
GO:0004720	Long-term potentiation	KEGG_17.03.2017	0.013	1	0.23	1	[-1]	Group166	62.6866	42	[ADCY1, ARAF, ATF4, BRAF, CACNA1C, CALM1, CALM2, CALM3, CALML6, CAMK2A, CAMK2G, CAMK4, CREBBP, EP300, GNAQ, GRIA1, GRIN2A, GRIN2C, GRIN2D, ITPR1, ITPR2, ITPR3, KRAS, MAP2K1, MAPK3, NRAS, PLCB4, PPP1CB, PPP1CC, PPP3CA, PPP3CB, PPP3CC, PRKACA, PRKACB, PRKCA, PRKCB, PRKCG, RAP1A, RAP1B, RPS6KA1, RPS6KA2, RPS6KA3]
GO:0004213	Longevity regulating pathway	KEGG_17.03.2017	0.00017	0.044	0.00036	0.053	[-1]	Group169	70.9677	44	[ADCY1, ADCY4, ADCY6, ADCY7, ADCY9, AKT1, AKT1S1, AKT2, AKT3, ATG5, CAT, CRYAB, EIF4EBP2, FOXO1, FOXO3, HDAC1, HDAC2, HSPA1A, HSPA1B, HSPA1L, IGF1, IGF1R, INS, INSR, IRS1, IRS2, KRAS, MTOR, NRAS, PIK3CA, PIK3R2, PRKAA1, PRKAA2, PRKAB2, PRKACA, PRKACB, PRKAG1, PRKAG2, PRKAG3, RPS6KB1, RPS6KB2, RPTOR, SOD1, SOD2]
GO:0004211	Longevity regulating pathway	KEGG_17.03.2017	0.00015	0.039	0.00036	0.053	[-1]	Group169	67.4157	60	[ADCY1, ADCY4, ADCY6, ADCY7, ADCY9, ADIPOR1, AKT1, AKT1S1, AKT2, AKT3, APPL1, ATF4, ATG13, ATG5, BAX, CAMK4, CAMKK2, CAT, CREB1, CREB3L2, CREB3L4, CREB5, EHMT1, EHMT2, EIF4E, EIF4E2, EIF4EBP1, FOXO1, FOXO3, IGF1, IGF1R, INS, INSR, IRS1, IRS2, KL, KRAS, MTOR, NRAS, PIK3CA, PIK3R2, PPARGC1A, PRKAA1, PRKAA2, PRKAB2, PRKACA, PRKACB, PRKAG1, PRKAG2, PRKAG3, RB1CC1, RELA, RHEB, RPS6KB1, RPS6KB2, RPTOR,…
GO:0000310	Lysine degradation	KEGG_17.03.2017	0.0038	0.89	0.0038	0.5	[-1]	Group126	66.1017	39	[AADAT, ACAT1, ACAT2, ALDH3A2, ALDH7A1, ALDH9A1, CAMKMT, COLGALT1, COLGALT2, DLST, DOT1L, ECHS1, EHMT1, EHMT2, EZH1, EZH2, HADH, HADHA, KMT2A, KMT2B, KMT2C, KMT2D, KMT2E, KMT5C, NSD1, PHYKPL, PIPOX, PLOD1, PLOD2, PLOD3, PRDM2, PRDM9, SETD1A, SETD7, SETDB1, SETDB2, SUV39H1, TMLHE, WHSC1]
GO:0004142	Lysosome	KEGG_17.03.2017	0.013	1	0.013	1	[-1]	Group074	58.5366	72	[ABCA2, ACP2, AGA, AP1B1, AP1G1, AP1M1, AP1S2, AP3D1, AP3S1, AP3S2, AP4E1, ARSA, ARSG, ASAH1, ATP6AP1, ATP6V0C, ATP6V1H, CD164, CD63, CD68, CLN5, CLTA, CLTB, CTSA, CTSB, CTSC, CTSE, CTSF, CTSG, CTSH, CTSK, CTSL, CTSO, CTSZ, DNASE2, ENTPD4, GAA, GALC, GGA1, GGA2, GGA3, GLB1, GM2A, GNPTAB, GNS, GUSB, HEXA, HGSNAT, IDS, IGF2R, LAMP1, LAMP2, LAMP3, LAPTM4A, LAPTM4B, LAPTM5, LGMN, MFSD8, NAGA, NAPSA, …
GO:0004010	MAPK signaling pathway	KEGG_17.03.2017	0.15	1	0.15	1	[-1]	Group070	51.7647	132	[AKT1, AKT2, AKT3, ATF4, BRAF, CACNA1A, CACNA1C, CACNA1H, CACNA1I, CACNA1S, CACNA2D1, CACNA2D2, CACNG4, CACNG5, CACNG8, CASP3, CD14, CDC42, CRKL, DUSP1, DUSP3, DUSP4, DUSP5, DUSP8, EGFR, ELK1, FAS, FGF1, FGF2, FGF22, FGF7, FGFR1, FLNA, FLNB, FLNC, FOS, GADD45A, GADD45B, GADD45G, GNA12, GNG12, GRB2, HSPA1A, HSPA1B, HSPA1L, HSPB1, IL1R1, JMJD7-PLA2G4B, JUN, KRAS, LAMTOR3, MAP2K1, MAP2K3, MAP2K4, MA…
GO:0005144	Malaria	KEGG_17.03.2017	1	1	1	1	[-1]	Group137	46.9388	23	[ACKR1, CD40, CD81, COMP, HBB, ICAM1, IL6, ITGB2, KLRB1, MET, PECAM1, SDC1, SDC2, SELE, TGFB1, TGFB3, THBS1, THBS2, THBS3, THBS4, TLR9, TNF, VCAM1]
GO:0000515	Mannose type O-glycan biosynthesis	KEGG_17.03.2017	0.83	1	0.83	1	[-1]	Group023	43.4783	10	[B4GALT2, B4GALT3, CHST10, FKTN, FUT4, ISPD, POMGNT1, POMGNT2, POMT1, POMT2]
GO:0004950	Maturity onset diabetes of the young	KEGG_17.03.2017	0.23	1	0.23	1	[-1]	Group116	34.6154	9	[FOXA3, HNF1B, INS, MAFA, NEUROG3, NR5A2, PAX4, PAX6, PKLR]
GO:0005162	Measles	KEGG_17.03.2017	0.86	1	0.0033	0.44	[-1]	Group167	46.2687	62	[ADAR, AKT1, AKT2, AKT3, CCND1, CCND2, CCNE2, CD28, CD3D, CD3E, CD3G, CD46, CDK6, CDKN1B, CLEC4M, CSNK2A1, CSNK2A2, DDX58, DOK1, EIF2AK3, EIF2AK4, EIF2S1, EIF3H, FAS, HSPA1A, HSPA1B, HSPA1L, IFNA4, IFNAR1, IFNGR1, IFNGR2, IL2RG, IL6, IRAK4, IRF7, JAK2, JAK3, MAP3K7, MAVS, MSN, NFKBIA, NFKBIB, OAS1, OAS2, OAS3, PIK3CA, PIK3R2, PRKCQ, RAB9A, RACK1, RCHY1, RELA, STAT1, STAT2, STAT3, STAT5B, TAB2, TL…
GO:0004916	Melanogenesis	KEGG_17.03.2017	0.22	1	0.97	1	[-1]	Group172	53.4653	54	[ADCY1, ADCY4, ADCY6, ADCY7, ADCY9, CALM1, CALM2, CALM3, CALML6, CAMK2A, CAMK2G, CREB1, CREB3L2, CREB3L4, CREBBP, CTNNB1, DCT, DVL1, EDN1, EP300, FZD1, FZD10, FZD5, FZD6, FZD7, FZD8, FZD9, GNAI1, GNAI2, GNAI3, GNAO1, GNAQ, GNAS, KIT, KITLG, KRAS, LEF1, MAP2K1, MAPK3, MC1R, MITF, NRAS, PLCB4, PRKACA, PRKACB, PRKCA, PRKCB, PRKCG, TCF7L2, WNT1, WNT10A, WNT2B, WNT3A, WNT6]
GO:0005218	Melanoma	KEGG_17.03.2017	0.62	1	0.024	1	[-1]	Group171	50.7246	35	[AKT1, AKT2, AKT3, ARAF, BAD, BRAF, CCND1, CDH1, CDK6, CDKN2A, E2F3, EGFR, FGF1, FGF2, FGF22, FGF7, FGFR1, IGF1, IGF1R, KRAS, MAP2K1, MAPK3, MDM2, MET, MITF, NRAS, PDGFA, PDGFC, PDGFD, PDGFRA, PDGFRB, PIK3CA, PIK3R2, PTEN, RB1]
GO:0000980	Metabolism of xenobiotics by cytochrome P450	KEGG_17.03.2017	0.0049	1	0.00054	0.078	[-1]	Group151	31.0811	23	[ADH1C, AKR1C1, AKR7A2, ALDH3B1, CBR1, CBR3, CYP1B1, CYP2A13, CYP2B6, CYP2E1, CYP2S1, CYP3A5, GSTA4, GSTK1, GSTM3, GSTM5, GSTO1, GSTP1, GSTT1, GSTT2, GSTT2B, MGST3, UGT1A6]
GO:0005206	MicroRNAs in cancer	KEGG_17.03.2017	3.5e-09	9.4e-07	3.5e-09	5.6e-07	[-1]	Group005	30.7692	92	[ABCC1, ABL1, ATM, BAK1, BCL2L11, BMI1, BMPR2, CASP3, CCND1, CCND2, CCNE2, CCNG1, CD44, CDCA5, CDK6, CDKN1B, CDKN2A, CREBBP, CRKL, CYP1B1, DDIT4, DICER1, DNMT1, DNMT3A, DNMT3B, E2F3, EGFR, EP300, ERBB2, EZH2, EZR, FOXP1, FSCN1, GLS, GRB2, HDAC1, HMGA2, HNRNPK, HOXD10, IRS1, IRS2, ITGA5, KRAS, MAP2K1, MARCKS, MCL1, MDM2, MET, MTOR, MYC, NOTCH2, NOTCH3, NRAS, PAK4, PDCD4, PDGFA, PDGFRA, PDGFRB, PIK…
GO:0004978	Mineral absorption	KEGG_17.03.2017	0.57	1	0.57	1	[-1]	Group125	51.9231	27	[ATOX1, ATP1A1, ATP1A4, ATP1B1, ATP1B2, ATP1B3, ATP7A, CYBRD1, FTH1, HMOX2, MT1A, MT1B, MT1E, MT1F, MT1G, MT1H, MT1M, MT1X, MT2A, SLC11A1, SLC26A6, SLC30A1, SLC40A1, SLC46A1, STEAP1, STEAP2, TRPV6]
GO:0003430	Mismatch repair	KEGG_17.03.2017	1	1	0.23	1	[-1]	Group154	47.8261	11	[LIG1, MLH1, MSH2, MSH6, PCNA, PMS2, POLD4, RFC2, RPA1, RPA2, RPA3]
GO:0004137	Mitophagy	KEGG_17.03.2017	0.012	1	0.012	1	[-1]	Group071	63.0769	41	[AMBRA1, ATF4, ATG5, BCL2L13, BNIP3, BNIP3L, CALCOCO2, CITED2, CSNK2A1, CSNK2A2, EIF2AK3, FOXO3, GABARAP, GABARAPL1, GABARAPL2, HIF1A, JUN, KRAS, MAPK10, MAPK8, MFN1, MFN2, MITF, MRAS, NRAS, OPTN, PARK2, PGAM5, RAB7A, RELA, RHOT2, RRAS, RRAS2, SP1, SQSTM1, TBC1D15, TFE3, TFEB, TOMM7, USP15, USP8]
GO:0005032	Morphine addiction	KEGG_17.03.2017	0.59	1	0.97	1	[-1]	Group172	50.5494	46	[ADCY1, ADCY4, ADCY6, ADCY7, ADCY9, CACNA1A, GABRB1, GABRB2, GABRB3, GABRD, GABRE, GABRQ, GNAI1, GNAI2, GNAI3, GNAO1, GNAS, GNB1, GNB4, GNB5, GNG10, GNG11, GNG12, GNG13, GNG7, GNG8, GRK2, GRK3, GRK4, GRK5, GRK6, KCNJ5, PDE1A, PDE1C, PDE3B, PDE4A, PDE4B, PDE4C, PDE4D, PDE8A, PDE8B, PRKACA, PRKACB, PRKCA, PRKCB, PRKCG]
GO:0000512	Mucin type O-glycan biosynthesis	KEGG_17.03.2017	0.27	1	0.27	1	[-1]	Group020	58.0645	18	[C1GALT1, C1GALT1C1, GALNT1, GALNT10, GALNT11, GALNT12, GALNT15, GALNT16, GALNT18, GALNT2, GALNT3, GALNT4, GALNT5, GALNT7, ST3GAL1, ST3GAL2, ST6GALNAC1, WBSCR17]
GO:0000510	N-Glycan biosynthesis	KEGG_17.03.2017	0.0058	1	0.0058	0.74	[-1]	Group018	67.3469	33	[ALG1, ALG10, ALG10B, ALG13, ALG14, ALG2, ALG5, ALG6, ALG8, ALG9, B4GALT2, B4GALT3, DAD1, DOLPP1, DPM1, FUT8, GANAB, MAN1A1, MAN1A2, MAN1C1, MAN2A1, MAN2A2, MGAT1, MGAT2, MGAT3, MGAT5, MOGS, RPN1, ST6GAL1, ST6GAL2, STT3A, STT3B, TUSC3]
GO:0004064	NF-kappa B signaling pathway	KEGG_17.03.2017	0.83	1	0.83	1	[-1]	Group102	48.4211	46	[ATM, BCL2A1, BIRC2, BTK, CARD11, CCL19, CCL4, CD14, CD40, CFLAR, CSNK2A1, CSNK2A2, CXCL2, DDX58, ERC1, GADD45B, ICAM1, IL1R1, IRAK4, LAT, LBP, LTB, LY96, LYN, MAP3K7, NFKBIA, PIDD1, PRKCB, PRKCQ, PTGS2, RELA, RELB, RIPK1, TAB2, TICAM1, TNF, TNFSF11, TNFSF13B, TNFSF14, TRADD, TRAF1, TRAF2, TRAF5, TRIM25, VCAM1, XIAP]
GO:0004621	NOD-like receptor signaling pathway	KEGG_17.03.2017	0.58	1	0.58	1	[-1]	Group097	49.4118	84	[ANTXR1, ANTXR2, ATG12, ATG5, BIRC2, BRCC3, CAMP, CARD6, CARD8, CASP5, CCL5, CTSB, CXCL1, CXCL2, DNM1L, ERBIN, GABARAP, GABARAPL1, GABARAPL2, GBP4, GBP7, HSP90AA1, HSP90AB1, IFI16, IFNA4, IFNAR1, IL6, IRAK4, IRF7, ITPR1, ITPR2, ITPR3, JUN, MAP3K7, MAPK10, MAPK11, MAPK12, MAPK3, MAPK8, MAVS, MCU, MEFV, MFN1, MFN2, NAIP, NAMPT, NFKBIA, NFKBIB, NLRP1, NLRP3, NLRX1, NOD2, NOX1, OAS1, OAS2, OAS3, PANX…
GO:0004650	Natural killer cell mediated cytotoxicity	KEGG_17.03.2017	1	1	1	1	[-1]	Group101	47.3684	63	[ARAF, BID, BRAF, CASP3, CSF2, FAS, FCER1G, FCGR3A, GRB2, GZMB, HCST, HLA-A, HLA-B, HLA-C, HLA-E, ICAM1, ICAM2, IFNA4, IFNAR1, IFNGR1, IFNGR2, ITGB2, KIR2DL4, KIR2DL5A, KIR2DS4, KIR3DL1, KRAS, LAT, MAP2K1, MAPK3, MICA, MICB, NCR1, NCR3, NFATC1, NFATC2, NRAS, PAK1, PIK3CA, PIK3R2, PPP3CA, PPP3CB, PPP3CC, PRKCA, PRKCB, PRKCG, PTK2B, PTPN11, PTPN6, RAC1, RAC2, SH3BP2, SHC1, SHC4, SOS2, TNF, TNFRSF10…
GO:0004080	Neuroactive ligand-receptor interaction	KEGG_17.03.2017	8e-08	2.1e-05	8e-08	1.2e-05	[-1]	Group008	31.6547	88	[ADORA2B, ADRA1A, ADRA2B, ADRA2C, APLNR, BDKRB1, BDKRB2, C3AR1, CALCR, CHRM4, CHRNA4, CHRND, CNR1, CNR2, CRHR1, CTSG, CYSLTR1, EDNRA, FPR1, FPR2, GABRB1, GABRB2, GABRB3, GABRD, GABRE, GABRQ, GCGR, GH1, GHSR, GIPR, GLP2R, GPR35, GPR50, GRIA1, GRIA3, GRID1, GRID2, GRIK2, GRIK3, GRIN2A, GRIN2C, GRIN2D, GRIN3B, GRM3, GRM7, HRH1, HRH2, HTR1B, HTR1D, HTR2A, HTR6, LEPR, LHB, LPAR1, LPAR2, LTB4R2, MC1R, …
GO:0004722	Neurotrophin signaling pathway	KEGG_17.03.2017	0.033	1	0.033	1	[-1]	Group105	57.1429	68	[ABL1, AKT1, AKT2, AKT3, ARHGDIB, ARHGDIG, ATF4, BAD, BAX, BRAF, CALM1, CALM2, CALM3, CALML6, CAMK2A, CAMK2G, CAMK4, CDC42, CRKL, FOXO3, GAB1, GRB2, IRAK3, IRAK4, IRS1, JUN, KIDINS220, KRAS, MAP2K1, MAP2K5, MAP2K7, MAP3K1, MAP3K3, MAP3K5, MAPK10, MAPK11, MAPK12, MAPK3, MAPK8, MAPKAPK2, NFKBIA, NFKBIB, NRAS, NTRK2, NTRK3, PDPK1, PIK3CA, PIK3R2, PRKCD, PTPN11, RAC1, RAP1A, RAP1B, RAPGEF1, RELA, RHO…
GO:0000760	Nicotinate and nicotinamide metabolism	KEGG_17.03.2017	1	1	1	1	[-1]	Group041	48.2759	14	[AOX1, BST1, ENPP1, NADSYN1, NAMPT, NMRK1, NNMT, NNT, NT5C3A, NT5C3B, NT5E, NT5M, NUDT12, PNP]
GO:0005033	Nicotine addiction	KEGG_17.03.2017	0.26	1	0.26	1	[-1]	Group130	37.5	15	[CACNA1A, CHRNA4, GABRB1, GABRB2, GABRB3, GABRD, GABRE, GABRQ, GRIA1, GRIA3, GRIN2A, GRIN2C, GRIN2D, GRIN3B, SLC17A7]
GO:0000910	Nitrogen metabolism	KEGG_17.03.2017	0.8	1	0.8	1	[-1]	Group049	52.9412	9	[CA13, CA3, CA5B, CA6, CA9, CPS1, GLUD1, GLUD2, GLUL]
GO:0004932	Non-alcoholic fatty liver disease (NAFLD)	KEGG_17.03.2017	0.00012	0.03	6.9e-05	0.01	[-1]	Group165	63.0872	94	[ADIPOR1, AKT1, AKT2, AKT3, ATF4, BAX, BCL2L11, BID, CASP3, CASP7, CDC42, COX4I1, COX4I2, COX6A1, COX6A2, COX6B1, COX6B2, COX6C, COX7A1, COX7A2, COX7A2L, COX7B, COX7C, COX8A, CYCS, CYP2E1, EIF2AK3, EIF2S1, FAS, GSK3A, IL6, INS, INSR, IRS1, IRS2, ITCH, JUN, LEPR, MAP3K5, MAPK10, MAPK8, MLXIP, MLXIPL, NDUFA1, NDUFA10, NDUFA11, NDUFA12, NDUFA13, NDUFA3, NDUFA4L2, NDUFA5, NDUFA7, NDUFA8, NDUFA9, NDUF…
GO:0003450	Non-homologous end-joining	KEGG_17.03.2017	0.78	1	0.78	1	[-1]	Group068	53.8462	7	[DCLRE1C, POLL, POLM, PRKDC, RAD50, XRCC4, XRCC6]
GO:0005223	Non-small cell lung cancer	KEGG_17.03.2017	0.23	1	0.024	1	[-1]	Group171	55.1724	32	[AKT1, AKT2, AKT3, ARAF, BAD, BRAF, CCND1, CDK6, CDKN2A, E2F3, EGFR, ERBB2, FOXO3, GRB2, JAK3, KRAS, MAP2K1, MAPK3, NRAS, PDPK1, PIK3CA, PIK3R2, PRKCA, PRKCB, PRKCG, RARB, RASSF1, RB1, SOS2, STAT3, STAT5B, STK4]
GO:0004330	Notch signaling pathway	KEGG_17.03.2017	0.38	1	0.38	1	[-1]	Group085	54.1667	26	[APH1A, APH1B, CREBBP, CTBP1, CTBP2, DLL1, DTX3L, DTX4, DVL1, EP300, HDAC1, HDAC2, JAG1, KAT2B, LFNG, MAML1, MAML3, NCOR2, NCSTN, NOTCH2, NOTCH3, NUMBL, PTCRA, RBPJ, RBPJL, SNW1]
GO:0003420	Nucleotide excision repair	KEGG_17.03.2017	0.46	1	0.23	1	[-1]	Group154	53.1915	25	[CDK7, CUL4A, CUL4B, DDB1, DDB2, ERCC2, ERCC5, ERCC8, GTF2H2C_2, GTF2H4, LIG1, MNAT1, PCNA, POLD4, POLE, POLE2, POLE3, POLE4, RAD23A, RAD23B, RBX1, RFC2, RPA1, RPA2, RPA3]
GO:0004740	Olfactory transduction	KEGG_17.03.2017	7.9e-37	2.1e-34	7.9e-37	1.2e-34	[-1]	Group106	18.3771	77	[CALM1, CALM2, CALM3, CALML6, CAMK2A, CAMK2G, CNGA2, CNGA4, CNGB1, GNB1, GNG13, GNG7, GRK2, GRK3, OR10C1, OR10G2, OR10G8, OR10H2, OR10J5, OR11A1, OR13H1, OR13J1, OR14J1, OR1B1, OR1D2, OR1J2, OR1J4, OR1K1, OR1L1, OR1L6, OR1N1, OR1N2, OR1S2, OR2A2, OR2A42, OR2AG2, OR2B6, OR2G6, OR2H1, OR2H2, OR2Y1, OR3A3, OR4D6, OR4E2, OR4F29, OR4F4, OR4K5, OR4N4, OR4Q3, OR4S1, OR51A7, OR51F1, OR51S1, OR51T1, OR52B…
GO:0000670	One carbon pool by folate	KEGG_17.03.2017	0.5	1	0.5	1	[-1]	Group037	55	11	[ALDH1L1, AMT, DHFR, DHFR2, FTCD, GART, MTHFD1, MTHFD1L, MTHFD2, MTHFR, TYMS]
GO:0004114	Oocyte meiosis	KEGG_17.03.2017	0.14	1	0.00036	0.053	[-1]	Group169	54.0323	67	[ADCY1, ADCY4, ADCY6, ADCY7, ADCY9, ANAPC1, ANAPC10, ANAPC11, ANAPC2, ANAPC4, BTRC, CALM1, CALM2, CALM3, CALML6, CAMK2A, CAMK2G, CCNE2, CDC16, CDC23, CDC26, CDC27, CPEB3, ESPL1, FBXO43, FBXO5, FBXW11, IGF1, IGF1R, INS, ITPR1, ITPR2, ITPR3, MAP2K1, MAPK12, MAPK3, PPP1CB, PPP1CC, PPP2CA, PPP2R5B, PPP2R5C, PPP2R5E, PPP3CA, PPP3CB, PPP3CC, PRKACA, PRKACB, PTTG1, PTTG2, RBX1, REC8, RPS6KA1, RPS6KA2, R…
GO:0004380	Osteoclast differentiation	KEGG_17.03.2017	0.13	1	0.072	1	[-1]	Group164	53.8462	70	[AKT1, AKT2, AKT3, BTK, CALCR, CAMK4, CREB1, CSF1, CSF1R, CTSK, CYLD, FCGR2A, FCGR2C, FCGR3A, FHL2, FOS, FOSB, GRB2, IFNAR1, IFNGR1, IFNGR2, IL1R1, JUN, JUNB, LILRA1, LILRA3, LILRA4, LILRB3, LILRB4, MAP2K1, MAP2K6, MAP2K7, MAP3K7, MAPK10, MAPK11, MAPK12, MAPK3, MAPK8, MITF, NCF1, NCF2, NFATC1, NFATC2, NFKBIA, NOX1, PIK3CA, PIK3R2, PPP3CA, PPP3CB, PPP3CC, RAC1, RELA, RELB, SIRPB1, SIRPG, SOCS1, SO…
GO:0000511	Other glycan degradation	KEGG_17.03.2017	0.34	1	0.34	1	[-1]	Group019	33.3333	6	[AGA, ENGASE, FUCA2, GLB1, HEXA, HEXDC]
GO:0000514	Other types of O-glycan biosynthesis	KEGG_17.03.2017	0.52	1	0.52	1	[-1]	Group021	54.5455	12	[B3GLCT, B4GALT2, B4GALT3, COLGALT1, COLGALT2, LFNG, OGT, PLOD3, POMT1, POMT2, ST6GAL1, ST6GAL2]
GO:0004913	Ovarian steroidogenesis	KEGG_17.03.2017	0.77	1	0.00036	0.053	[-1]	Group169	50	25	[ADCY1, ADCY4, ADCY6, ADCY7, ADCY9, AKR1C3, ALOX5, BMP6, CYP11A1, CYP1B1, GNAS, IGF1, IGF1R, INS, INSR, JMJD7-PLA2G4B, LDLR, LHB, PLA2G4A, PLA2G4E, PLA2G4F, PRKACA, PRKACB, PTGS2, SCARB1]
GO:0000190	Oxidative phosphorylation	KEGG_17.03.2017	0.0084	1	6.9e-05	0.01	[-1]	Group165	58.6466	78	[ATP12A, ATP5A1, ATP5C1, ATP5E, ATP5F1, ATP5G1, ATP5G2, ATP5G3, ATP5H, ATP5I, ATP5J, ATP5J2, ATP5L, ATP5O, ATP6AP1, ATP6V0C, ATP6V0E1, ATP6V1A, ATP6V1B2, ATP6V1C1, ATP6V1C2, ATP6V1D, ATP6V1E2, ATP6V1G1, ATP6V1H, COX11, COX17, COX4I1, COX4I2, COX6A1, COX6A2, COX6B1, COX6B2, COX6C, COX7A1, COX7A2, COX7A2L, COX7B, COX7C, COX8A, NDUFA1, NDUFA10, NDUFA11, NDUFA12, NDUFA13, NDUFA3, NDUFA4L2, NDUFA5, ND…
GO:0004921	Oxytocin signaling pathway	KEGG_17.03.2017	0.017	1	0.97	1	[-1]	Group172	56.8627	87	[ACTB, ACTG1, ADCY1, ADCY4, ADCY6, ADCY7, ADCY9, CACNA1C, CACNA1S, CACNA2D1, CACNA2D2, CACNG4, CACNG5, CACNG8, CALM1, CALM2, CALM3, CALML6, CAMK1D, CAMK2A, CAMK2G, CAMK4, CAMKK2, CCND1, EEF2, EEF2K, EGFR, ELK1, FOS, GNAI1, GNAI2, GNAI3, GNAO1, GNAQ, GNAS, GUCY1A3, ITPR1, ITPR2, ITPR3, JMJD7-PLA2G4B, JUN, KCNJ12, KCNJ5, KRAS, MAP2K1, MAP2K5, MAPK3, MYL6, MYL9, MYLK, NFATC1, NFATC2, NFATC4, NOS3, N…
GO:0004151	PI3K-Akt signaling pathway	KEGG_17.03.2017	0.37	1	0.005	0.65	[-1]	Group159	49.7076	170	[AKT1, AKT2, AKT3, ANGPT1, ANGPT4, ATF4, BAD, BCL2L11, CCND1, CCND2, CCNE2, CDC37, CDK6, CDKN1B, CHAD, COL1A1, COL1A2, COL2A1, COL6A1, COL6A2, COL6A3, COL9A1, COL9A2, COMP, CREB1, CREB3L2, CREB3L4, CREB5, CRTC2, CSF1, CSF1R, CSF3R, DDIT4, EFNA5, EGFR, EIF4B, EIF4E, EIF4E2, EIF4EBP1, EPOR, FGF1, FGF2, FGF22, FGF7, FGFR1, FLT4, FN1, FOXO3, GH1, GNB1, GNB4, GNB5, GNG10, GNG11, GNG12, GNG13, GNG7, GN…
GO:0003320	PPAR signaling pathway	KEGG_17.03.2017	0.63	1	0.63	1	[-1]	Group064	44.4444	32	[ACAA1, ACADM, ACOX1, ACSBG2, ACSL3, ACSL4, ACSL5, ANGPTL4, APOA1, APOA5, CPT1A, CPT1C, CYP27A1, DBI, FABP5, FABP6, FABP7, FADS2, LPL, MMP1, PCK2, PDPK1, PLIN2, PLIN4, PPARD, SCD, SCD5, SCP2, SLC27A1, SLC27A4, SORBS1, UBC]
GO:0005212	Pancreatic cancer	KEGG_17.03.2017	0.1	1	0.024	1	[-1]	Group171	57.8125	37	[AKT1, AKT2, AKT3, ARAF, ARHGEF6, BAD, BRAF, CCND1, CDC42, CDK6, CDKN2A, E2F3, EGFR, ERBB2, KRAS, MAP2K1, MAPK10, MAPK3, MAPK8, PIK3CA, PIK3R2, RAC1, RAC2, RAD51, RALBP1, RB1, RELA, SMAD2, SMAD3, SMAD4, STAT1, STAT3, TGFB1, TGFB3, TGFBR1, TGFBR2, VEGFA]
GO:0004972	Pancreatic secretion	KEGG_17.03.2017	1	1	0.97	1	[-1]	Group172	46.875	45	[ADCY1, ADCY4, ADCY6, ADCY7, ADCY9, ATP1A1, ATP1A4, ATP1B1, ATP1B2, ATP1B3, ATP2A1, ATP2A2, ATP2B4, BST1, CEL, CELA2A, CELA2B, CELA3A, CELA3B, CPA3, CTRL, GNAQ, GNAS, ITPR1, ITPR2, ITPR3, PLA2G10, PLA2G12A, PLA2G1B, PLA2G2D, PLCB4, PNLIPRP1, PRKCA, PRKCB, PRKCG, PRSS1, RAB11A, RAB27B, RAC1, RAP1A, RAP1B, RHOA, SLC4A4, TPCN2, TRPC1]
GO:0000770	Pantothenate and CoA biosynthesis	KEGG_17.03.2017	0.63	1	0.63	1	[-1]	Group042	38.8889	7	[AASDHPPT, BCAT1, DPYD, ENPP1, PANK3, PPCS, VNN1]
GO:0005012	Parkinson's disease	KEGG_17.03.2017	0.013	1	6.9e-05	0.01	[-1]	Group165	57.7465	82	[ATP5A1, ATP5C1, ATP5E, ATP5F1, ATP5G1, ATP5G2, ATP5G3, ATP5H, ATP5J, ATP5O, CASP3, COX4I1, COX4I2, COX6A1, COX6A2, COX6B1, COX6B2, COX6C, COX7A1, COX7A2, COX7A2L, COX7B, COX7C, COX8A, CYCS, GNAI1, GNAI2, GNAI3, LRRK2, NDUFA1, NDUFA10, NDUFA11, NDUFA12, NDUFA13, NDUFA3, NDUFA4L2, NDUFA5, NDUFA7, NDUFA8, NDUFA9, NDUFAB1, NDUFB2, NDUFB3, NDUFB4, NDUFB5, NDUFB6, NDUFB8, NDUFC1, NDUFC2, NDUFS1, NDUFS…
GO:0005130	Pathogenic Escherichia coli infection	KEGG_17.03.2017	0.0015	0.37	0.0015	0.21	[-1]	Group133	69.0909	38	[ABL1, ACTB, ACTG1, ARPC1B, ARPC2, ARPC5, CD14, CDC42, CDH1, CTNNB1, CTTN, EZR, HCLS1, ITGB1, LY96, NCK1, NCK2, NCL, PRKCA, RHOA, ROCK1, ROCK2, TLR5, TUBA1B, TUBA1C, TUBA3C, TUBA8, TUBB, TUBB2A, TUBB2B, TUBB3, TUBB4A, TUBB4B, TUBB6, WAS, WASL, YWHAQ, YWHAZ]
GO:0005200	Pathways in cancer	KEGG_17.03.2017	0.005	1	0.005	0.65	[-1]	Group142	54.1772	214	[ABL1, ADCY1, ADCY4, ADCY6, ADCY7, ADCY9, AKT1, AKT2, AKT3, APPL1, ARAF, ARNT2, AXIN1, BAD, BAX, BCR, BDKRB1, BDKRB2, BID, BIRC2, BMP2, BMP4, BRAF, CASP3, CBL, CCDC6, CCND1, CCNE2, CDC42, CDH1, CDK6, CDKN1B, CDKN2A, CKS2, CREBBP, CRKL, CSF1R, CSF2RA, CSF3R, CTBP1, CTBP2, CTNNA1, CTNNB1, CUL2, CXCR4, CYCS, DAPK2, DAPK3, DVL1, E2F3, EDNRA, EGFR, EGLN1, EGLN3, ELOC, EP300, EPAS1, ERBB2, ETS1, FAS, F…
GO:0000040	Pentose and glucuronate interconversions	KEGG_17.03.2017	0.087	1	0.087	1	[-1]	Group011	32.3529	11	[AKR1A1, AKR1B1, DCXR, GUSB, ISPD, KL, RPE, SORD, UGDH, UGP2, UGT1A6]
GO:0000030	Pentose phosphate pathway	KEGG_17.03.2017	0.36	1	0.36	1	[-1]	Group110	56.6667	17	[ALDOA, ALDOB, ALDOC, DERA, GPI, H6PD, PFKM, PFKP, PGD, PGLS, PGM1, PGM2, PRPS1, PRPS2, RPE, TALDO1, TKTL1]
GO:0004146	Peroxisome	KEGG_17.03.2017	0.32	1	0.32	1	[-1]	Group077	53.012	44	[ABCD1, ABCD4, ACAA1, ACOT8, ACOX1, ACSL3, ACSL4, ACSL5, AGPS, CAT, CRAT, DHRS4, DHRS4L1, ECH1, ECI2, GNPAT, GSTK1, HACL1, HAO1, HMGCL, HSD17B4, IDH1, IDH2, MPV17, NOS2, NUDT12, NUDT7, PAOX, PEX11B, PEX13, PEX14, PEX19, PEX3, PEX5, PEX7, PHYH, PIPOX, PRDX1, PXMP2, PXMP4, SCP2, SLC25A17, SOD1, SOD2]
GO:0005133	Pertussis	KEGG_17.03.2017	0.1	1	0.1	1	[-1]	Group134	56.5789	43	[C1QA, C1QB, C1QC, C1R, C2, C3, C4B, C5, CALM1, CALM2, CALM3, CALML6, CASP3, CASP7, CD14, CFL2, CXCL5, FOS, GNAI1, GNAI2, GNAI3, IL6, IRAK4, ITGA5, ITGAM, ITGB1, ITGB2, JUN, LY96, MAPK10, MAPK11, MAPK12, MAPK3, MAPK8, NLRP3, NOS2, RELA, RHOA, SERPING1, SFTPA1, SFTPA2, TICAM1, TNF]
GO:0004145	Phagosome	KEGG_17.03.2017	0.00058	0.14	0.00058	0.083	[-1]	Group076	61.039	94	[ACTB, ACTG1, ATP6AP1, ATP6V0C, ATP6V0E1, ATP6V1A, ATP6V1B2, ATP6V1C1, ATP6V1C2, ATP6V1D, ATP6V1E2, ATP6V1G1, ATP6V1H, C1R, C3, CALR, CANX, CD14, CLEC4M, COLEC12, COMP, CTSL, DYNC1H1, DYNC1I1, DYNC1I2, DYNC1LI2, DYNC2H1, EEA1, FCGR2A, FCGR2C, FCGR3A, HGS, HLA-A, HLA-B, HLA-C, HLA-DMA, HLA-DMB, HLA-DOA, HLA-DPA1, HLA-DPB1, HLA-DQA1, HLA-DQB1, HLA-DRA, HLA-DRB1, HLA-DRB3, HLA-DRB4, HLA-DRB5, HLA-E,…
GO:0000360	Phenylalanine metabolism	KEGG_17.03.2017	0.15	1	0.18	1	[-1]	Group144	29.4118	5	[ALDH3B1, AOC3, GLYAT, GOT2, MIF]
GO:0004070	Phosphatidylinositol signaling system	KEGG_17.03.2017	0.15	1	0.14	1	[-1]	Group150	54.6392	53	[CALM1, CALM2, CALM3, CALML6, CDS2, DGKB, DGKD, DGKQ, DGKZ, IMPA1, IMPA2, IMPAD1, INPP5D, INPP5E, INPP5J, INPP5K, INPPL1, IP6K1, IP6K2, IPPK, ITPK1, ITPKB, ITPR1, ITPR2, ITPR3, MTM1, MTMR14, MTMR2, MTMR4, MTMR6, MTMR8, OCRL, PI4K2B, PI4KA, PIK3C2A, PIK3C2G, PIK3C3, PIK3CA, PIK3R2, PIKFYVE, PIP4K2A, PIP4K2B, PIP5K1A, PLCB4, PLCD4, PPIP5K2, PRKCA, PRKCB, PRKCG, PTEN, SYNJ2, TMEM55A, TMEM55B]
GO:0004072	Phospholipase D signaling pathway	KEGG_17.03.2017	0.35	1	0.0018	0.24	[-1]	Group158	51.3699	75	[ADCY1, ADCY4, ADCY6, ADCY7, ADCY9, AGPAT2, AGPAT4, AGPAT5, AKT1, AKT2, AKT3, ARF6, CXCR1, CXCR2, CYTH1, CYTH2, CYTH3, DGKB, DGKD, DGKQ, DGKZ, DNM1, EGFR, FCER1A, FCER1G, GAB1, GNA12, GNA13, GNAS, GRB2, GRM3, GRM7, INS, INSR, JMJD7-PLA2G4B, KIT, KITLG, KRAS, LPAR1, LPAR2, MAP2K1, MAPK3, MRAS, MTOR, NRAS, PDGFA, PDGFC, PDGFD, PDGFRA, PDGFRB, PIK3CA, PIK3R2, PIK3R6, PIP5K1A, PLA2G4A, PLA2G4E, PLA2G…
GO:0000440	Phosphonate and phosphinate metabolism	KEGG_17.03.2017	0.1	1	0.1	1	[-1]	Group013	83.3333	5	[CEPT1, CHPT1, PCYT1A, PCYT2, SELENOI]
GO:0004744	Phototransduction	KEGG_17.03.2017	0.057	1	0.057	1	[-1]	Group108	28.5714	8	[CALM1, CALM2, CALM3, CALML6, CNGB1, GNB1, GRK1, SLC24A1]
GO:0004611	Platelet activation	KEGG_17.03.2017	0.17	1	0.97	1	[-1]	Group172	53.6585	66	[ACTB, ACTG1, ADCY1, ADCY4, ADCY6, ADCY7, ADCY9, AKT1, AKT2, AKT3, APBB1IP, BTK, COL1A1, COL1A2, COL3A1, FCER1G, FCGR2A, GNA13, GNAI1, GNAI2, GNAI3, GNAQ, GNAS, GP1BA, GUCY1A3, ITGA2B, ITGB1, ITPR1, ITPR2, ITPR3, JMJD7-PLA2G4B, LYN, MAPK11, MAPK12, MAPK3, MYL12A, MYL12B, MYLK, NOS3, P2RX1, PIK3CA, PIK3R2, PIK3R6, PLA2G4A, PLA2G4E, PLA2G4F, PLCB4, PPP1CB, PPP1CC, PPP1R12A, PRKACA, PRKACB, PRKCI, P…
GO:0000860	Porphyrin and chlorophyll metabolism	KEGG_17.03.2017	0.00089	0.21	0.00089	0.12	[-1]	Group046	21.4286	9	[BLVRA, BLVRB, CP, CPOX, EPRS, FECH, GUSB, HMOX2, UGT1A6]
GO:0000120	Primary bile acid biosynthesis	KEGG_17.03.2017	0.63	1	0.63	1	[-1]	Group067	41.1765	7	[ACOT8, AKR1C4, CYP27A1, CYP39A1, HSD17B4, HSD3B7, SCP2]
GO:0005340	Primary immunodeficiency	KEGG_17.03.2017	0.62	1	0.62	1	[-1]	Group009	51.3514	19	[ADA, AICDA, AIRE, BTK, CD3D, CD3E, CD4, CD40, CD79A, CD8A, CD8B, DCLRE1C, IL2RG, IL7R, JAK3, PTPRC, RFX5, RFXAP, UNG]
GO:0005020	Prion diseases	KEGG_17.03.2017	0.17	1	0.17	1	[-1]	Group128	60	21	[BAX, C1QA, C1QB, C1QC, C5, C8B, CCL5, EGR1, ELK1, HSPA1A, HSPA5, IL6, LAMC1, MAP2K1, MAPK3, NCAM1, NCAM2, PRKACA, PRKACB, PRNP, SOD1]
GO:0004914	Progesterone-mediated oocyte maturation	KEGG_17.03.2017	0.75	1	0.00036	0.053	[-1]	Group169	48.9583	47	[ADCY1, ADCY4, ADCY6, ADCY7, ADCY9, AKT1, AKT2, AKT3, ANAPC1, ANAPC10, ANAPC11, ANAPC2, ANAPC4, ARAF, BRAF, CDC16, CDC23, CDC26, CDC27, CPEB3, FZR1, GNAI1, GNAI2, GNAI3, HSP90AA1, HSP90AB1, IGF1, IGF1R, INS, KRAS, MAP2K1, MAPK10, MAPK11, MAPK12, MAPK3, MAPK8, PDE3B, PIK3CA, PIK3R2, PRKACA, PRKACB, RPS6KA1, RPS6KA2, RPS6KA3, SPDYA, SPDYC, SPDYE2]
GO:0004917	Prolactin signaling pathway	KEGG_17.03.2017	0.54	1	0.024	1	[-1]	Group171	51.4286	36	[AKT1, AKT2, AKT3, CCND1, CCND2, ESR1, FOS, FOXO3, GALT, GRB2, INS, JAK2, KRAS, LHB, MAP2K1, MAPK10, MAPK11, MAPK12, MAPK3, MAPK8, NRAS, PIK3CA, PIK3R2, RELA, SHC1, SHC4, SOCS1, SOCS3, SOCS4, SOCS5, SOS2, STAT1, STAT3, STAT5B, TH, TNFSF11]
GO:0000640	Propanoate metabolism	KEGG_17.03.2017	0.049	1	0.69	1	[-1]	Group162	65.625	21	[ABAT, ACACA, ACACB, ACADM, ACAT1, ACAT2, ACSS1, ACSS3, ALDH6A1, BCKDHB, DBT, ECHDC1, ECHS1, HADHA, HIBCH, LDHA, MCEE, MUT, PCCA, PCCB, SUCLG2]
GO:0005215	Prostate cancer	KEGG_17.03.2017	0.022	1	0.024	1	[-1]	Group171	59.7701	52	[AKT1, AKT2, AKT3, ARAF, ATF4, BAD, BRAF, CCND1, CCNE2, CDKN1B, CREB1, CREB3L2, CREB3L4, CREB5, CREBBP, CTNNB1, E2F3, EGFR, EP300, ERBB2, FGFR1, FOXO1, GRB2, GSTP1, HSP90AA1, HSP90AB1, HSP90B1, IGF1, IGF1R, INS, INSRR, KRAS, LEF1, MAP2K1, MAPK3, MDM2, MTOR, NFKBIA, NRAS, PDGFA, PDGFC, PDGFD, PDGFRA, PDGFRB, PDPK1, PIK3CA, PIK3R2, PTEN, RB1, RELA, SOS2, TCF7L2]
GO:0003050	Proteasome	KEGG_17.03.2017	0.17	1	0.17	1	[-1]	Group062	57.7778	26	[ADRM1, POMP, PSMA2, PSMA3, PSMA4, PSMA6, PSMA7, PSMB1, PSMB2, PSMB4, PSMB7, PSMB9, PSMC1, PSMC3, PSMC4, PSMD1, PSMD12, PSMD14, PSMD2, PSMD4, PSMD7, PSMD8, PSME1, PSME2, PSME4, SHFM1]
GO:0004974	Protein digestion and absorption	KEGG_17.03.2017	0.52	1	0.52	1	[-1]	Group122	51.1111	46	[ATP1A1, ATP1A4, ATP1B1, ATP1B2, ATP1B3, CELA2A, CELA2B, CELA3A, CELA3B, COL10A1, COL11A1, COL11A2, COL13A1, COL14A1, COL15A1, COL18A1, COL1A1, COL1A2, COL21A1, COL27A1, COL2A1, COL3A1, COL5A1, COL5A2, COL6A1, COL6A2, COL6A3, COL7A1, COL9A1, COL9A2, CPA3, CTRL, KCNE3, KCNK5, KCNN4, MEP1A, MME, PGA3, PRCP, PRSS1, SLC15A1, SLC16A10, SLC1A1, SLC36A1, SLC38A2, XPNPEP2]
GO:0003060	Protein export	KEGG_17.03.2017	0.4	1	0.4	1	[-1]	Group063	56.5217	13	[HSPA5, SEC11A, SEC11C, SEC61B, SEC61G, SEC63, SPCS1, SPCS2, SPCS3, SRP14, SRP72, SRP9, SRPRA]
GO:0004141	Protein processing in endoplasmic reticulum	KEGG_17.03.2017	8.8e-06	0.0022	8.8e-06	0.0013	[-1]	Group073	64.4578	107	[AMFR, ATF4, ATF6, ATXN3, BAG1, BAG2, BAK1, BAX, BCAP31, CALR, CANX, CAPN2, CRYAA, CRYAB, DAD1, DERL1, DERL2, DERL3, DNAJA1, DNAJA2, DNAJB1, DNAJB11, DNAJB12, DNAJB2, DNAJC3, DNAJC5, EIF2AK3, EIF2AK4, EIF2S1, ERLEC1, ERO1A, ERO1B, FBXO6, GANAB, HERPUD1, HSP90AA1, HSP90AB1, HSP90B1, HSPA1A, HSPA1B, HSPA1L, HSPA5, HSPH1, LMAN1, LMAN1L, MAN1A1, MAN1A2, MAN1C1, MAP2K7, MAP3K5, MAPK10, MAPK8, MBTPS1, …
GO:0005205	Proteoglycans in cancer	KEGG_17.03.2017	2.9e-06	0.00077	2.9e-06	0.00045	[-1]	Group004	63.5468	129	[ACTB, ACTG1, AKT1, AKT2, AKT3, ANK1, ANK2, ANK3, ARAF, BRAF, CAMK2A, CAMK2G, CASP3, CAV1, CAV2, CBL, CCND1, CD44, CD63, CDC42, COL21A1, CTNNB1, CTSL, CTTN, DCN, DROSHA, EGFR, EIF4B, ELK1, ERBB2, ERBB4, ESR1, EZR, FAS, FGF2, FGFR1, FLNA, FLNB, FLNC, FN1, FZD1, FZD10, FZD5, FZD6, FZD7, FZD8, FZD9, GAB1, GPC1, GPC3, GRB2, HBEGF, HCLS1, HIF1A, HOXD10, HPSE2, HSPB2, HSPG2, IGF1, IGF1R, IQGAP1, ITGA5,…
GO:0004964	Proximal tubule bicarbonate reclamation	KEGG_17.03.2017	0.67	1	0.67	1	[-1]	Group119	52.1739	12	[AQP1, ATP1A1, ATP1A4, ATP1B1, ATP1B2, ATP1B3, GLS, GLUD1, GLUD2, MDH1, PCK2, SLC4A4]
GO:0000230	Purine metabolism	KEGG_17.03.2017	0.12	1	0.43	1	[-1]	Group160	53.1429	93	[ADA, ADCY1, ADCY4, ADCY6, ADCY7, ADCY9, ADK, ADPRM, ADSL, ADSS, AK1, AK2, AK3, AK4, AK8, AMPD2, AMPD3, CANT1, DCK, ENPP1, ENTPD1, ENTPD4, ENTPD6, GART, GDA, GMPS, GUCY1A3, HPRT1, IMPDH1, IMPDH2, ITPA, NME1, NME2, NME3, NME7, NPR1, NPR2, NT5C3A, NT5C3B, NT5E, NT5M, NTPCR, NUDT16, NUDT5, NUDT9, PAICS, PAPSS1, PAPSS2, PDE1A, PDE1C, PDE3B, PDE4A, PDE4B, PDE4C, PDE4D, PDE6D, PDE8A, PDE8B, PGM1, PGM2,…
GO:0000240	Pyrimidine metabolism	KEGG_17.03.2017	0.075	1	0.43	1	[-1]	Group160	56.1905	59	[CAD, CANT1, CMPK1, CMPK2, CTPS2, DCK, DHODH, DPYD, DTYMK, DUT, ENPP1, ENTPD1, ENTPD4, ENTPD6, NME1, NME2, NME3, NME7, NT5C3A, NT5C3B, NT5E, NT5M, PNP, POLA1, POLD4, POLE, POLE2, POLE3, POLE4, POLR1C, POLR1D, POLR1E, POLR2D, POLR2E, POLR2F, POLR2G, POLR2H, POLR2J, POLR2J2, POLR2J3, POLR2K, POLR2L, POLR3A, POLR3E, POLR3G, PRIM1, PRIM2, RRM1, RRM2B, TK1, TK2, TWISTNB, TYMP, TYMS, UCK2, UCKL1, UMPS,…
GO:0000620	Pyruvate metabolism	KEGG_17.03.2017	0.63	1	0.63	1	[-1]	Group034	51.2821	20	[ACACA, ACACB, ACAT1, ACAT2, ACSS1, ACYP1, ACYP2, ALDH3A2, ALDH7A1, ALDH9A1, FH, HAGH, LDHA, MDH1, MDH2, PCK2, PDHA1, PDHB, PKLR, PKM]
GO:0004622	RIG-I-like receptor signaling pathway	KEGG_17.03.2017	0.63	1	0.63	1	[-1]	Group098	44.2857	31	[ATG12, ATG5, AZI2, CASP10, CYLD, DDX3X, DDX58, IFNA4, IRF7, MAP3K1, MAP3K7, MAPK10, MAPK11, MAPK12, MAPK8, MAVS, NFKBIA, NFKBIB, NLRX1, PIN1, RELA, RIPK1, SIKE1, TANK, TBKBP1, TKFC, TMEM173, TNF, TRADD, TRAF2, TRIM25]
GO:0003018	RNA degradation	KEGG_17.03.2017	0.0082	1	0.0082	1	[-1]	Group059	62.3377	48	[BTG1, BTG3, C1D, CNOT10, CNOT3, CNOT6L, CNOT7, CNOT8, DCP1A, DCP1B, DCP2, DCPS, DDX6, DHX36, EDC4, ENO1, ENO2, EXOSC2, EXOSC3, EXOSC7, EXOSC8, EXOSC9, HSPA9, HSPD1, LSM1, LSM2, LSM3, LSM5, LSM6, LSM7, LSM8, MPHOSPH6, NUDT16, PABPC1, PABPC3, PABPC4, PABPC5, PAN2, PAPD7, PARN, PFKM, PFKP, SKIV2L, SKIV2L2, TTC37, XRN1, XRN2, ZCCHC7]
GO:0003020	RNA polymerase	KEGG_17.03.2017	0.37	1	0.43	1	[-1]	Group160	56.25	18	[POLR1C, POLR1D, POLR1E, POLR2D, POLR2E, POLR2F, POLR2G, POLR2H, POLR2J, POLR2J2, POLR2J3, POLR2K, POLR2L, POLR3A, POLR3E, POLR3G, TWISTNB, ZNRD1]
GO:0003013	RNA transport	KEGG_17.03.2017	0.00062	0.15	0.00062	0.088	[-1]	Group056	60.2339	103	[AAAS, ALYREF, CASC3, CLNS1A, CYFIP1, EEF1A1, EIF1, EIF1AX, EIF1AY, EIF1B, EIF2B3, EIF2S1, EIF2S2, EIF3A, EIF3B, EIF3C, EIF3E, EIF3F, EIF3G, EIF3H, EIF3I, EIF4A2, EIF4A3, EIF4B, EIF4E, EIF4E2, EIF4EBP1, EIF4EBP2, EIF4G2, EIF5, EIF5B, ELAC2, FXR1, GEMIN6, GEMIN7, KPNB1, MAGOHB, NCBP1, NCBP2, NDC1, NMD3, NUP107, NUP133, NUP153, NUP155, NUP160, NUP205, NUP214, NUP35, NUP37, NUP43, NUP54, NUP58, NUP6…
GO:0004015	Rap1 signaling pathway	KEGG_17.03.2017	0.02	1	0.045	1	[-1]	Group148	55.2381	116	[ACTB, ACTG1, ADCY1, ADCY4, ADCY6, ADCY7, ADCY9, ADORA2B, AFDN, AKT1, AKT2, AKT3, ANGPT1, ANGPT4, APBB1IP, ARAP3, BCAR1, BRAF, CALM1, CALM2, CALM3, CALML6, CDC42, CDH1, CNR1, CRKL, CSF1, CSF1R, CTNNB1, CTNND1, DOCK4, EFNA5, EGFR, FGF1, FGF2, FGF22, FGF7, FGFR1, FLT4, FPR1, GNAI1, GNAI2, GNAI3, GNAO1, GNAQ, GNAS, GRIN2A, ID1, IGF1, IGF1R, INS, INSR, ITGA2B, ITGAM, ITGB1, ITGB2, KIT, KITLG, KRAS, L…
GO:0004014	Ras signaling pathway	KEGG_17.03.2017	0.63	1	0.045	1	[-1]	Group148	48.8987	111	[ABL1, ABL2, AFDN, AKT1, AKT2, AKT3, ANGPT1, ANGPT4, ARF6, BAD, CALM1, CALM2, CALM3, CALML6, CDC42, CSF1, CSF1R, EFNA5, EGFR, ELK1, ETS1, ETS2, FGF1, FGF2, FGF22, FGF7, FGFR1, FLT4, GAB1, GNB1, GNB4, GNB5, GNG10, GNG11, GNG12, GNG13, GNG7, GNG8, GRB2, GRIN2A, IGF1, IGF1R, INS, INSR, JMJD7-PLA2G4B, KIT, KITLG, KRAS, LAT, MAP2K1, MAPK10, MAPK3, MAPK8, MET, MRAS, NF1, NRAS, PAK1, PAK2, PAK4, PAK6, P…
GO:0004810	Regulation of actin cytoskeleton	KEGG_17.03.2017	0.1	1	0.005	0.65	[-1]	Group159	52.8302	112	[ACTB, ACTG1, ARAF, ARHGEF6, ARHGEF7, ARPC1B, ARPC2, ARPC5, BAIAP2, BCAR1, BDKRB1, BDKRB2, BRAF, BRK1, CD14, CDC42, CFL2, CHRM4, CRKL, CYFIP1, DIAPH1, DIAPH3, DOCK1, EGFR, ENAH, EZR, FGD1, FGD3, FGF1, FGF2, FGF22, FGF7, FGFR1, FN1, GNA12, GNA13, GNG12, INS, INSRR, IQGAP1, IQGAP2, ITGA10, ITGA11, ITGA2B, ITGA5, ITGA6, ITGA7, ITGAE, ITGAM, ITGAV, ITGAX, ITGB1, ITGB2, ITGB4, ITGB5, ITGB7, ITGB8, KRA…
GO:0004923	Regulation of lipolysis in adipocytes	KEGG_17.03.2017	0.58	1	0.00036	0.053	[-1]	Group169	51.8519	28	[ABHD5, ADCY1, ADCY4, ADCY6, ADCY7, ADCY9, AKT1, AKT2, AKT3, GNAI1, GNAI2, GNAI3, GNAS, INS, INSR, IRS1, IRS2, MGLL, NPR1, PDE3B, PIK3CA, PIK3R2, PLA2G16, PNPLA2, PRKACA, PRKACB, PTGER3, PTGS2]
GO:0005211	Renal cell carcinoma	KEGG_17.03.2017	0.0004	0.1	0.024	1	[-1]	Group171	69.2308	45	[AKT1, AKT2, AKT3, ARAF, ARNT2, BRAF, CDC42, CREBBP, CRKL, CUL2, EGLN1, EGLN3, ELOC, EP300, EPAS1, ETS1, FH, FLCN, GAB1, GRB2, HIF1A, JUN, KRAS, MAP2K1, MAPK3, MET, NRAS, PAK1, PAK2, PAK4, PAK6, PIK3CA, PIK3R2, PTPN11, RAC1, RAP1A, RAP1B, RAPGEF1, RBX1, SLC2A1, SOS2, TGFB1, TGFB3, VEGFA, VHL]
GO:0004924	Renin secretion	KEGG_17.03.2017	0.31	1	0.97	1	[-1]	Group172	53.8462	35	[ACE, ADCY6, AGT, AQP1, CACNA1C, CACNA1S, CALM1, CALM2, CALM3, CALML6, CREB1, CTSB, EDNRA, GNAI1, GNAI2, GNAI3, GNAQ, GNAS, GUCY1A3, ITPR1, ITPR2, ITPR3, NPR1, PDE1A, PDE1C, PDE3B, PLCB4, PPP3CA, PPP3CB, PPP3CC, PRKACA, PRKACB, PTGER2, PTGER4, REN]
GO:0004614	Renin-angiotensin system	KEGG_17.03.2017	0.21	1	0.21	1	[-1]	Group096	60.8696	14	[ACE, AGT, ANPEP, ATP6AP2, CPA3, CTSA, CTSG, KLK2, MME, NLN, PRCP, PREP, REN, THOP1]
GO:0000830	Retinol metabolism	KEGG_17.03.2017	0.0016	0.38	0.0016	0.22	[-1]	Group044	27.6923	18	[ADH1C, ALDH1A1, AOX1, BCO1, CYP26B1, CYP26C1, CYP2B6, CYP2S1, CYP3A5, CYP4A11, DGAT1, DHRS3, DHRS4, DHRS4L1, DHRS4L2, PNPLA4, RDH11, UGT1A6]
GO:0004723	Retrograde endocannabinoid signaling	KEGG_17.03.2017	0.54	1	0.97	1	[-1]	Group172	50.495	51	[ABHD6, ADCY1, ADCY4, ADCY6, ADCY7, ADCY9, CACNA1A, CACNA1C, CACNA1S, CNR1, GABRB1, GABRB2, GABRB3, GABRD, GABRE, GABRQ, GNAI1, GNAI2, GNAI3, GNAO1, GNAQ, GNB1, GNB4, GNB5, GNG10, GNG11, GNG12, GNG13, GNG7, GNG8, GRIA1, GRIA3, ITPR1, ITPR2, ITPR3, KCNJ5, MAPK10, MAPK11, MAPK12, MAPK3, MAPK8, MGLL, NAPEPLD, PLCB4, PRKACA, PRKACB, PRKCA, PRKCB, PRKCG, PTGS2, SLC17A7]
GO:0005323	Rheumatoid arthritis	KEGG_17.03.2017	0.28	1	0.89	1	[-1]	Group170	53.3333	48	[ANGPT1, ATP6AP1, ATP6V0C, ATP6V0E1, ATP6V1A, ATP6V1B2, ATP6V1C1, ATP6V1C2, ATP6V1D, ATP6V1E2, ATP6V1G1, ATP6V1H, CCL3, CCL5, CD28, CSF1, CSF2, CTSK, CTSL, CXCL1, CXCL5, FOS, HLA-DMA, HLA-DMB, HLA-DOA, HLA-DPA1, HLA-DPB1, HLA-DQA1, HLA-DQB1, HLA-DRA, HLA-DRB1, HLA-DRB3, HLA-DRB4, HLA-DRB5, ICAM1, IL11, IL6, ITGB2, JUN, LTB, MMP1, TCIRG1, TGFB1, TGFB3, TNF, TNFSF11, TNFSF13B, VEGFA]
GO:0000740	Riboflavin metabolism	KEGG_17.03.2017	1	1	1	1	[-1]	Group039	50	4	[ACP1, ACP2, BLVRB, ENPP1]
GO:0003010	Ribosome	KEGG_17.03.2017	0.00016	0.041	0.00016	0.024	[-1]	Group055	62.3377	96	[FAU, MRPL1, MRPL10, MRPL13, MRPL14, MRPL17, MRPL19, MRPL2, MRPL28, MRPL3, MRPL30, MRPL32, MRPL33, MRPL34, MRPL35, MRPS10, MRPS14, MRPS18C, MRPS2, MRPS21, MRPS5, MRPS6, MRPS9, RPL10, RPL10A, RPL10L, RPL11, RPL13, RPL13A, RPL15, RPL17, RPL18, RPL18A, RPL19, RPL21, RPL22, RPL22L1, RPL23, RPL23A, RPL24, RPL26, RPL26L1, RPL27, RPL28, RPL29, RPL30, RPL31, RPL32, RPL34, RPL35, RPL35A, RPL36A, RPL36AL, …
GO:0003008	Ribosome biogenesis in eukaryotes	KEGG_17.03.2017	0.32	1	0.32	1	[-1]	Group054	42.4528	45	[BMS1, CSNK2A1, CSNK2A2, DKC1, DROSHA, EFL1, FBL, FCF1, GNL3, GNL3L, GTPBP4, HEATR1, IMP3, LSG1, MDN1, MPHOSPH10, NHP2, NMD3, NOL6, NOP10, NOP58, NXF1, NXF3, NXT1, NXT2, POP1, POP5, POP7, RAN, REXO1, REXO2, RMRP, RPP25, RPP30, SBDS, SNORD3B-1, SNU13, TBL3, TCOF1, UTP18, WDR3, WDR36, XPO1, XRN1, XRN2]
GO:0004130	SNARE interactions in vesicular transport	KEGG_17.03.2017	0.6	1	0.6	1	[-1]	Group057	52.9412	18	[BET1, BET1L, GOSR1, GOSR2, SNAP23, STX16, STX1A, STX4, STX6, STX7, STX8, USE1, VAMP2, VAMP3, VAMP4, VAMP7, VAMP8, VTI1B]
GO:0004970	Salivary secretion	KEGG_17.03.2017	0.45	1	0.97	1	[-1]	Group172	43.3333	39	[ADCY1, ADCY4, ADCY6, ADCY7, ADCY9, ADRA1A, AMY1C, AQP5, ATP1A1, ATP1A4, ATP1B1, ATP1B2, ATP1B3, ATP2B4, BST1, CALM1, CALM2, CALM3, CALML6, CAMP, DMBT1, GNAQ, GNAS, GUCY1A3, ITPR1, ITPR2, ITPR3, KCNN4, NOS1, PLCB4, PRB1, PRH2, PRKACA, PRKACB, PRKCA, PRKCB, PRKCG, TRPV6, VAMP2]
GO:0005132	Salmonella infection	KEGG_17.03.2017	0.029	1	0.011	1	[-1]	Group156	59.3023	51	[ACTB, ACTG1, ARPC1B, ARPC2, ARPC5, CCL3, CCL4, CD14, CDC42, CSF2, CXCL1, CXCL2, DYNC1H1, DYNC1I1, DYNC1I2, DYNC1LI2, DYNC2H1, FLNA, FLNB, FLNC, FOS, IFNGR1, IFNGR2, IL6, JUN, KLC2, LBP, MAPK10, MAPK11, MAPK12, MAPK3, MAPK8, MYH10, MYH14, MYH9, NOS2, PFN2, PKN1, PKN2, PKN3, RAB7A, RAC1, RELA, RHOG, ROCK1, ROCK2, TJP1, TLR5, WAS, WASF1, WASL]
GO:0000450	Selenocompound metabolism	KEGG_17.03.2017	1	1	1	1	[-1]	Group014	47.0588	8	[CTH, INMT, KYAT1, MARS, PAPSS1, PAPSS2, PSTK, SCLY]
GO:0004726	Serotonergic synapse	KEGG_17.03.2017	0.63	1	0.97	1	[-1]	Group172	49.5575	56	[ALOX15, ALOX15B, ALOX5, APP, ARAF, BRAF, CACNA1A, CACNA1C, CACNA1S, CASP3, CYP4X1, DUSP1, GABRB1, GABRB2, GABRB3, GNAI1, GNAI2, GNAI3, GNAO1, GNAQ, GNAS, GNB1, GNB4, GNB5, GNG10, GNG11, GNG12, GNG13, GNG7, GNG8, HTR1B, HTR1D, HTR2A, HTR6, ITPR1, ITPR2, ITPR3, JMJD7-PLA2G4B, KCNJ5, KCNN2, KRAS, MAP2K1, MAPK3, NRAS, PLA2G4A, PLA2G4E, PLA2G4F, PLCB4, PRKACA, PRKACB, PRKCA, PRKCB, PRKCG, PTGS2, SLC1…
GO:0005131	Shigellosis	KEGG_17.03.2017	0.012	1	0.011	1	[-1]	Group156	63.0769	41	[ABL1, ACTB, ACTG1, ARPC1B, ARPC2, ARPC5, ATG5, BTRC, CD44, CDC42, CRKL, CTTN, DIAPH1, DOCK1, ELMO1, ELMO2, FBXW11, HCLS1, ITGA5, ITGB1, MAPK10, MAPK11, MAPK12, MAPK3, MAPK8, NFKBIA, NFKBIB, NOD2, PFN2, RAC1, RELA, RHOG, RIPK2, ROCK1, ROCK2, U2AF1, UBE2D2, VCL, WAS, WASF1, WASL]
GO:0004550	Signaling pathways regulating pluripotency of stem cells	KEGG_17.03.2017	0.73	1	0.024	1	[-1]	Group171	48.9209	68	[ACVR1, AKT1, AKT2, AKT3, AXIN1, BMI1, BMP4, BMPR1A, BMPR2, CTNNB1, DVL1, FGF2, FGFR1, FZD1, FZD10, FZD5, FZD6, FZD7, FZD8, FZD9, GRB2, HOXB1, ID1, ID2, ID3, ID4, IGF1, IGF1R, IL6ST, INHBA, INHBC, JAK2, JAK3, JARID2, KLF4, KRAS, LIFR, MAP2K1, MAPK11, MAPK12, MAPK3, MEIS1, MYC, MYF5, NRAS, OTX1, PAX6, PCGF3, PCGF5, PCGF6, PIK3CA, PIK3R2, RIF1, SETDB1, SMAD2, SMAD3, SMAD4, SMAD5, SMAD9, SMARCAD1, S…
GO:0005222	Small cell lung cancer	KEGG_17.03.2017	0.82	1	0.82	1	[-1]	Group007	48.8095	41	[AKT1, AKT2, AKT3, BIRC2, CCND1, CCNE2, CDK6, CDKN1B, CKS2, CYCS, E2F3, FN1, ITGA2B, ITGA6, ITGAV, ITGB1, LAMA4, LAMA5, LAMB1, LAMB2, LAMB3, LAMC1, LAMC3, MAX, MYC, NFKBIA, NOS2, PIAS2, PIK3CA, PIK3R2, PTEN, PTGS2, PTK2, RARB, RB1, RELA, TRAF1, TRAF2, TRAF4, TRAF5, XIAP]
GO:0000600	Sphingolipid metabolism	KEGG_17.03.2017	0.55	1	0.55	1	[-1]	Group032	42.5532	20	[ACER1, ARSA, ASAH1, ASAH2, B4GALT6, CERS2, CERS5, CERS6, DEGS1, GALC, GLB1, KDSR, PLPP3, SGMS1, SGPL1, SGPP1, SMPD4, SPHK1, SPHK2, SPTLC1]
GO:0004071	Sphingolipid signaling pathway	KEGG_17.03.2017	0.04	1	0.04	1	[-1]	Group002	56.7797	67	[ABCC1, ACER1, AKT1, AKT2, AKT3, ASAH1, ASAH2, BAX, BDKRB2, BID, CERS2, CERS5, CERS6, DEGS1, FCER1A, FCER1G, GNA12, GNA13, GNAI1, GNAI2, GNAI3, GNAQ, KRAS, MAP2K1, MAP3K5, MAPK10, MAPK11, MAPK12, MAPK3, MAPK8, NOS3, NRAS, NSMAF, PDPK1, PIK3CA, PIK3R2, PLCB4, PLD2, PPP2CA, PPP2R2A, PPP2R3A, PPP2R3C, PPP2R5B, PPP2R5C, PPP2R5E, PRKCA, PRKCB, PRKCE, PRKCG, PRKCZ, PTEN, RAC1, RAC2, RELA, RHOA, ROCK1, …
GO:0003040	Spliceosome	KEGG_17.03.2017	0.011	1	0.011	1	[-1]	Group061	58.209	78	[ALYREF, AQR, BCAS2, BUD31, CCDC12, CDC5L, DDX23, DHX15, EFTUD2, EIF4A3, HNRNPA1, HNRNPA1L2, HNRNPA3, HNRNPC, HNRNPK, HNRNPM, HNRNPU, HSPA1A, HSPA1B, HSPA1L, ISY1, LSM2, LSM3, LSM5, LSM6, LSM7, LSM8, MAGOHB, NCBP1, NCBP2, PCBP1, PPIH, PRPF18, PRPF38A, PRPF38B, PRPF4, PRPF40A, PRPF6, PRPF8, RBM17, RBM8A, RBMX, SF3A1, SF3A2, SF3A3, SF3B1, SF3B3, SF3B6, SLU7, SMNDC1, SNRNP200, SNRNP27, SNRPB2, SNRPC…
GO:0005150	Staphylococcus aureus infection	KEGG_17.03.2017	0.0066	1	0.89	1	[-1]	Group170	66.0714	37	[C1QA, C1QB, C1QC, C1R, C2, C3, C3AR1, C4B, C5, CFB, CFD, CFH, CFI, FCGR2A, FCGR2C, FCGR3A, FPR1, FPR2, HLA-DMA, HLA-DMB, HLA-DOA, HLA-DPA1, HLA-DPB1, HLA-DQA1, HLA-DQB1, HLA-DRA, HLA-DRB1, HLA-DRB3, HLA-DRB4, HLA-DRB5, ICAM1, ITGAM, ITGB2, KRT10, MASP2, PTAFR, SELPLG]
GO:0005150	Staphylococcus aureus infection	KEGG_17.03.2017	0.0066	1	0.013	1	[-1]	Group168	66.0714	37	[C1QA, C1QB, C1QC, C1R, C2, C3, C3AR1, C4B, C5, CFB, CFD, CFH, CFI, FCGR2A, FCGR2C, FCGR3A, FPR1, FPR2, HLA-DMA, HLA-DMB, HLA-DOA, HLA-DPA1, HLA-DPB1, HLA-DQA1, HLA-DQB1, HLA-DRA, HLA-DRB1, HLA-DRB3, HLA-DRB4, HLA-DRB5, ICAM1, ITGAM, ITGB2, KRT10, MASP2, PTAFR, SELPLG]
GO:0005150	Staphylococcus aureus infection	KEGG_17.03.2017	0.0066	1	0.18	1	[-1]	Group152	66.0714	37	[C1QA, C1QB, C1QC, C1R, C2, C3, C3AR1, C4B, C5, CFB, CFD, CFH, CFI, FCGR2A, FCGR2C, FCGR3A, FPR1, FPR2, HLA-DMA, HLA-DMB, HLA-DOA, HLA-DPA1, HLA-DPB1, HLA-DQA1, HLA-DQB1, HLA-DRA, HLA-DRB1, HLA-DRB3, HLA-DRB4, HLA-DRB5, ICAM1, ITGAM, ITGB2, KRT10, MASP2, PTAFR, SELPLG]
GO:0000500	Starch and sucrose metabolism	KEGG_17.03.2017	0.61	1	0.57	1	[-1]	Group145	41.6667	15	[AGL, AMY1C, ENPP1, GAA, GANC, GBE1, GPI, GYG1, GYG2, HK1, HKDC1, PGM1, PGM2, PGM2L1, UGP2]
GO:0000100	Steroid biosynthesis	KEGG_17.03.2017	1	1	1	1	[-1]	Group129	45	9	[CEL, CYP2R1, CYP51A1, EBP, LSS, MSMO1, NSDHL, SOAT1, SQLE]
GO:0000140	Steroid hormone biosynthesis	KEGG_17.03.2017	0.00032	0.079	0.00032	0.046	[-1]	Group086	24.1379	14	[AKR1C1, AKR1C3, AKR1C4, COMT, CYP11A1, CYP11B1, CYP1B1, CYP21A2, CYP2E1, CYP3A5, HSD11B2, HSD17B12, SRD5A1, UGT1A6]
GO:0000920	Sulfur metabolism	KEGG_17.03.2017	0.53	1	0.53	1	[-1]	Group050	60	6	[CYCS, IMPAD1, MPST, PAPSS1, PAPSS2, SQRDL]
GO:0004122	Sulfur relay system	KEGG_17.03.2017	0.48	1	0.48	1	[-1]	Group047	62.5	5	[CTU1, MOCS2, MOCS3, MPST, NFS1]
GO:0004721	Synaptic vesicle cycle	KEGG_17.03.2017	1	1	0.3	1	[-1]	Group155	47.619	30	[AP2B1, AP2M1, AP2S1, ATP6V0C, ATP6V0E1, ATP6V1A, ATP6V1B2, ATP6V1C1, ATP6V1C2, ATP6V1D, ATP6V1E2, ATP6V1G1, ATP6V1H, CACNA1A, CLTA, CLTB, CPLX1, CPLX2, DNM1, NSF, SLC17A7, SLC18A1, SLC18A3, SNAP25, STX1A, STXBP1, SYT1, TCIRG1, UNC13B, VAMP2]
GO:0000072	Synthesis and degradation of ketone bodies	KEGG_17.03.2017	1	1	0.69	1	[-1]	Group162	50	5	[ACAT1, ACAT2, HMGCL, HMGCS1, OXCT1]
GO:0005322	Systemic lupus erythematosus	KEGG_17.03.2017	0.93	1	0.89	1	[-1]	Group170	46.6165	62	[C1QA, C1QB, C1QC, C1R, C2, C3, C4B, C5, C8B, CD28, CD40, CTSG, ELANE, FCGR2A, FCGR3A, GRIN2A, H2AFB2, H2AFV, H2AFX, H2AFZ, H2BFM, H3F3A, H3F3B, HIST1H2AC, HIST1H2AE, HIST1H2AI, HIST1H2AL, HIST1H2BC, HIST1H2BL, HIST1H3A, HIST1H3B, HIST1H3C, HIST1H3D, HIST1H3E, HIST1H3G, HIST1H3J, HIST1H4A, HIST1H4B, HIST1H4C, HIST1H4K, HIST2H2AA4, HIST2H2BF, HIST2H3A, HIST2H3D, HIST3H2BB, HIST3H3, HIST4H4, HLA-DM…
GO:0005322	Systemic lupus erythematosus	KEGG_17.03.2017	0.93	1	0.18	1	[-1]	Group152	46.6165	62	[C1QA, C1QB, C1QC, C1R, C2, C3, C4B, C5, C8B, CD28, CD40, CTSG, ELANE, FCGR2A, FCGR3A, GRIN2A, H2AFB2, H2AFV, H2AFX, H2AFZ, H2BFM, H3F3A, H3F3B, HIST1H2AC, HIST1H2AE, HIST1H2AI, HIST1H2AL, HIST1H2BC, HIST1H2BL, HIST1H3A, HIST1H3B, HIST1H3C, HIST1H3D, HIST1H3E, HIST1H3G, HIST1H3J, HIST1H4A, HIST1H4B, HIST1H4C, HIST1H4K, HIST2H2AA4, HIST2H2BF, HIST2H3A, HIST2H3D, HIST3H2BB, HIST3H3, HIST4H4, HLA-DM…
GO:0004660	T cell receptor signaling pathway	KEGG_17.03.2017	0.42	1	0.0081	1	[-1]	Group163	51.4563	53	[AKT1, AKT2, AKT3, CARD11, CBL, CD28, CD3D, CD3E, CD3G, CD4, CD8A, CD8B, CDC42, CSF2, DLG1, FOS, GRB2, JUN, KRAS, LAT, MAP2K1, MAP2K7, MAP3K7, MAP3K8, MAPK11, MAPK12, MAPK3, NCK1, NCK2, NFATC1, NFATC2, NFKBIA, NFKBIB, NRAS, PAK1, PAK2, PAK4, PAK6, PDPK1, PIK3CA, PIK3R2, PPP3CA, PPP3CB, PPP3CC, PRKCQ, PTPN6, PTPRC, RELA, RHOA, SOS2, TNF, VAV1, VAV2]
GO:0004350	TGF-beta signaling pathway	KEGG_17.03.2017	0.047	1	0.047	1	[-1]	Group088	58.3333	49	[ACVR1, AMHR2, BMP2, BMP4, BMP6, BMP8B, BMPR1A, BMPR2, CHRD, CREBBP, DCN, EP300, FST, GDF6, ID1, ID2, ID3, ID4, INHBA, INHBC, LTBP1, MAPK3, MINOS1-NBL1, MYC, PITX2, PPP2CA, RBX1, RHOA, ROCK1, RPS6KB1, RPS6KB2, SKP1, SMAD2, SMAD3, SMAD4, SMAD5, SMAD6, SMAD9, SMURF2, SP1, TFDP1, TGFB1, TGFB3, TGFBR1, TGFBR2, TGIF1, THBS1, TNF, ZFYVE16]
GO:0004668	TNF signaling pathway	KEGG_17.03.2017	0.0012	0.3	0.072	1	[-1]	Group164	62.963	68	[AKT1, AKT2, AKT3, ATF4, BAG4, BCL3, BIRC2, CASP10, CASP3, CASP7, CCL5, CEBPB, CFLAR, CREB1, CREB3L2, CREB3L4, CREB5, CSF1, CSF2, CX3CL1, CXCL1, CXCL2, CXCL5, DNM1L, EDN1, FAS, FOS, ICAM1, IL6, ITCH, JAG1, JUN, JUNB, MAP2K1, MAP2K3, MAP2K4, MAP2K6, MAP2K7, MAP3K5, MAP3K7, MAP3K8, MAPK10, MAPK11, MAPK12, MAPK3, MAPK8, MLKL, NFKBIA, NOD2, PGAM5, PIK3CA, PIK3R2, PTGS2, RELA, RIPK1, RIPK3, RPS6KA5, S…
GO:0004742	Taste transduction	KEGG_17.03.2017	5.3e-05	0.013	5.3e-05	0.008	[-1]	Group107	25.3012	21	[ADCY4, ADCY6, CACNA1A, CACNA1C, GNG13, HTR1B, HTR1D, ITPR3, KCNK5, P2RX2, P2RY4, PDE1A, PDE1C, PKD2L1, PRKACA, PRKACB, TAS1R2, TAS1R3, TAS2R31, TAS2R38, TAS2R43]
GO:0000430	Taurine and hypotaurine metabolism	KEGG_17.03.2017	0.55	1	0.55	1	[-1]	Group012	36.3636	4	[ADO, CDO1, GGT1, GGT7]
GO:0000900	Terpenoid backbone biosynthesis	KEGG_17.03.2017	0.13	1	0.13	1	[-1]	Group048	63.6364	14	[ACAT1, ACAT2, DHDDS, FDPS, FNTA, FNTB, GGPS1, HMGCR, HMGCS1, ICMT, IDI2, NUS1, PCYOX1, PDSS2]
GO:0004658	Th1 and Th2 cell differentiation	KEGG_17.03.2017	0.092	1	0.89	1	[-1]	Group170	56.5217	52	[CD3D, CD3E, CD3G, CD4, DLL1, FOS, HLA-DMA, HLA-DMB, HLA-DOA, HLA-DPA1, HLA-DPB1, HLA-DQA1, HLA-DQB1, HLA-DRA, HLA-DRB1, HLA-DRB3, HLA-DRB4, HLA-DRB5, IFNGR1, IFNGR2, IL2RG, IL4R, JAG1, JAK2, JAK3, JUN, LAT, MAML1, MAML3, MAPK10, MAPK11, MAPK12, MAPK3, MAPK8, NFATC1, NFATC2, NFKBIA, NFKBIB, NOTCH2, NOTCH3, PPP3CA, PPP3CB, PPP3CC, PRKCQ, RBPJ, RBPJL, RELA, RUNX3, STAT1, STAT5B, STAT6, TBX21]
GO:0004658	Th1 and Th2 cell differentiation	KEGG_17.03.2017	0.092	1	0.013	1	[-1]	Group168	56.5217	52	[CD3D, CD3E, CD3G, CD4, DLL1, FOS, HLA-DMA, HLA-DMB, HLA-DOA, HLA-DPA1, HLA-DPB1, HLA-DQA1, HLA-DQB1, HLA-DRA, HLA-DRB1, HLA-DRB3, HLA-DRB4, HLA-DRB5, IFNGR1, IFNGR2, IL2RG, IL4R, JAG1, JAK2, JAK3, JUN, LAT, MAML1, MAML3, MAPK10, MAPK11, MAPK12, MAPK3, MAPK8, NFATC1, NFATC2, NFKBIA, NFKBIB, NOTCH2, NOTCH3, PPP3CA, PPP3CB, PPP3CC, PRKCQ, RBPJ, RBPJL, RELA, RUNX3, STAT1, STAT5B, STAT6, TBX21]
GO:0004659	Th17 cell differentiation	KEGG_17.03.2017	0.01	1	0.89	1	[-1]	Group170	59.8131	64	[AHR, CD3D, CD3E, CD3G, CD4, FOS, FOXP3, HIF1A, HLA-DMA, HLA-DMB, HLA-DOA, HLA-DPA1, HLA-DPB1, HLA-DQA1, HLA-DQB1, HLA-DRA, HLA-DRB1, HLA-DRB3, HLA-DRB4, HLA-DRB5, HSP90AA1, HSP90AB1, IFNGR1, IFNGR2, IL17F, IL1R1, IL1RAP, IL2RG, IL4R, IL6, IL6ST, JAK2, JAK3, JUN, LAT, MAPK10, MAPK11, MAPK12, MAPK3, MAPK8, MTOR, NFATC1, NFATC2, NFKBIA, NFKBIB, PPP3CA, PPP3CB, PPP3CC, PRKCQ, RARA, RELA, RORA, RUNX1…
GO:0004659	Th17 cell differentiation	KEGG_17.03.2017	0.01	1	0.013	1	[-1]	Group168	59.8131	64	[AHR, CD3D, CD3E, CD3G, CD4, FOS, FOXP3, HIF1A, HLA-DMA, HLA-DMB, HLA-DOA, HLA-DPA1, HLA-DPB1, HLA-DQA1, HLA-DQB1, HLA-DRA, HLA-DRB1, HLA-DRB3, HLA-DRB4, HLA-DRB5, HSP90AA1, HSP90AB1, IFNGR1, IFNGR2, IL17F, IL1R1, IL1RAP, IL2RG, IL4R, IL6, IL6ST, JAK2, JAK3, JUN, LAT, MAPK10, MAPK11, MAPK12, MAPK3, MAPK8, MTOR, NFATC1, NFATC2, NFKBIA, NFKBIB, PPP3CA, PPP3CB, PPP3CC, PRKCQ, RARA, RELA, RORA, RUNX1…
GO:0000730	Thiamine metabolism	KEGG_17.03.2017	0.13	1	0.13	1	[-1]	Group038	68.75	11	[ACP1, AK1, AK2, AK4, AK8, ALPI, ALPL, ALPPL2, NFS1, NTPCR, TPK1]
GO:0005216	Thyroid cancer	KEGG_17.03.2017	1	1	0.024	1	[-1]	Group171	48.2759	14	[BRAF, CCDC6, CCND1, CDH1, CTNNB1, KRAS, LEF1, MAP2K1, MAPK3, MYC, NCOA4, NRAS, TCF7L2, TPM3]
GO:0004919	Thyroid hormone signaling pathway	KEGG_17.03.2017	0.13	1	0.13	1	[-1]	Group112	54.3103	63	[ACTB, ACTG1, AKT1, AKT2, AKT3, ATP1A1, ATP1A4, ATP1B1, ATP1B2, ATP1B3, ATP2A2, BAD, BMP4, CCND1, CREBBP, CTNNB1, DIO2, EP300, ESR1, FOXO1, GATA4, HDAC1, HDAC2, HDAC3, HIF1A, ITGAV, KAT2B, KRAS, MAP2K1, MAPK3, MDM2, MED13, MED13L, MED14, MED17, MED30, MED4, MTOR, MYC, NCOA2, NOTCH2, NOTCH3, NRAS, PDPK1, PFKFB2, PFKP, PIK3CA, PIK3R2, PLCB4, PLCD4, PRKACA, PRKACB, PRKCA, PRKCB, PRKCG, RCAN1, RCAN2,…
GO:0004918	Thyroid hormone synthesis	KEGG_17.03.2017	0.062	1	0.97	1	[-1]	Group172	58.1081	43	[ADCY1, ADCY4, ADCY6, ADCY7, ADCY9, ALB, ASGR1, ATF4, ATP1A1, ATP1A4, ATP1B1, ATP1B2, ATP1B3, CANX, CREB1, CREB3L2, CREB3L4, CREB5, DUOXA2, GNAQ, GNAS, GPX1, GPX2, GPX3, GPX5, GPX6, GPX7, GPX8, HSP90B1, HSPA5, ITPR1, ITPR2, ITPR3, PDIA4, PLCB4, PRKACA, PRKACB, PRKCA, PRKCB, PRKCG, SERPINA7, SLC26A4, TTF2]
GO:0004530	Tight junction	KEGG_17.03.2017	0.01	1	0.01	1	[-1]	Group095	57.0588	97	[ACTB, ACTG1, ACTR2, ACTR3, ACTR3C, AFDN, AMOT, ARHGAP17, ARHGEF18, CCND1, CD1B, CDC42, CLDN11, CLDN15, CLDN18, CLDN19, CLDN22, CLDN23, CLDN25, CLDN4, CTTN, DLG1, DLG3, ERBB2, EZR, GATA4, HCLS1, HSPA4, ITGB1, JAM2, JAM3, JUN, LLGL2, MAP2K7, MAP3K1, MAP3K5, MAPK10, MAPK8, MARVELD2, MICALL2, MPP5, MSN, MYH10, MYH14, MYH2, MYH9, MYL12A, MYL12B, MYL6, MYL9, NEDD4L, NF2, PARD3, PARD6G, PATJ, PCNA, PPP…
GO:0004620	Toll-like receptor signaling pathway	KEGG_17.03.2017	0.42	1	0.072	1	[-1]	Group164	43.2692	45	[AKT1, AKT2, AKT3, CCL3, CCL4, CCL5, CD14, CD40, CTSK, FOS, IFNA4, IFNAR1, IL6, IRAK4, IRF5, IRF7, JUN, LBP, LY96, MAP2K1, MAP2K3, MAP2K4, MAP2K6, MAP2K7, MAP3K7, MAP3K8, MAPK10, MAPK11, MAPK12, MAPK3, MAPK8, NFKBIA, PIK3CA, PIK3R2, RAC1, RELA, RIPK1, SPP1, STAT1, TAB2, TICAM1, TLR5, TLR9, TNF, TOLLIP]
GO:0005145	Toxoplasmosis	KEGG_17.03.2017	0.01	1	0.013	1	[-1]	Group168	59.292	67	[AKT1, AKT2, AKT3, ALOX5, BAD, BIRC2, CASP3, CCR5, CD40, CYCS, GNAI1, GNAI2, GNAI3, GNAO1, HLA-DMA, HLA-DMB, HLA-DOA, HLA-DPA1, HLA-DPB1, HLA-DQA1, HLA-DQB1, HLA-DRA, HLA-DRB1, HLA-DRB3, HLA-DRB4, HLA-DRB5, HSPA1A, HSPA1B, HSPA1L, IFNGR1, IFNGR2, IL10RB, IRAK4, ITGA6, ITGB1, JAK2, LAMA4, LAMA5, LAMB1, LAMB2, LAMB3, LAMC1, LAMC3, LDLR, LY96, MAP2K3, MAP2K6, MAP3K7, MAPK10, MAPK11, MAPK12, MAPK3, M…
GO:0005145	Toxoplasmosis	KEGG_17.03.2017	0.01	1	0.0033	0.44	[-1]	Group167	59.292	67	[AKT1, AKT2, AKT3, ALOX5, BAD, BIRC2, CASP3, CCR5, CD40, CYCS, GNAI1, GNAI2, GNAI3, GNAO1, HLA-DMA, HLA-DMB, HLA-DOA, HLA-DPA1, HLA-DPB1, HLA-DQA1, HLA-DQB1, HLA-DRA, HLA-DRB1, HLA-DRB3, HLA-DRB4, HLA-DRB5, HSPA1A, HSPA1B, HSPA1L, IFNGR1, IFNGR2, IL10RB, IRAK4, ITGA6, ITGB1, JAK2, LAMA4, LAMA5, LAMB1, LAMB2, LAMB3, LAMC1, LAMC3, LDLR, LY96, MAP2K3, MAP2K6, MAP3K7, MAPK10, MAPK11, MAPK12, MAPK3, M…
GO:0005202	Transcriptional misregulation in cancer	KEGG_17.03.2017	0.04	1	0.04	1	[-1]	Group143	55	99	[ARNT2, ASPSCR1, ATF1, ATM, BCL2A1, BCL6, BMI1, CCND2, CCNT1, CD14, CD40, CDK14, CDK9, CDKN1B, CDKN2C, CEBPB, CSF1R, CSF2, DOT1L, ELANE, ERG, ETV6, ETV7, EWSR1, FLI1, FOXO1, FUT8, GOLPH3, GRIA3, GZMB, H3F3A, H3F3B, HDAC1, HDAC2, HIST1H3A, HIST1H3B, HIST1H3C, HIST1H3D, HIST1H3E, HIST1H3G, HIST1H3J, HIST2H3A, HIST2H3D, HIST3H3, HMGA2, HOXA10, HOXA9, HPGD, ID2, IGF1, IGF1R, IGFBP3, IL6, ITGAM, ITGB7…
GO:0000380	Tryptophan metabolism	KEGG_17.03.2017	0.63	1	0.63	1	[-1]	Group006	42.5	17	[AADAT, ACAT1, ACAT2, ACMSD, ALDH3A2, ALDH7A1, ALDH9A1, AOC1, AOX1, CAT, CYP1B1, ECHS1, HADH, HADHA, INMT, KMO, KYAT1]
GO:0005152	Tuberculosis	KEGG_17.03.2017	0.22	1	0.013	1	[-1]	Group168	51.9553	93	[AKT1, AKT2, AKT3, ATP6AP1, ATP6V0C, ATP6V1H, BAD, BAX, BID, C3, CALM1, CALM2, CALM3, CALML6, CAMK2A, CAMK2G, CAMP, CASP10, CASP3, CD14, CD74, CEBPB, CEBPG, CLEC4M, CREB1, CREBBP, CYCS, EEA1, EP300, FCER1G, FCGR2A, FCGR2C, FCGR3A, HLA-DMA, HLA-DMB, HLA-DOA, HLA-DPA1, HLA-DPB1, HLA-DQA1, HLA-DQB1, HLA-DRA, HLA-DRB1, HLA-DRB3, HLA-DRB4, HLA-DRB5, HSPA9, HSPD1, IFNA4, IFNGR1, IFNGR2, IL10RB, IL6, IR…
GO:0005152	Tuberculosis	KEGG_17.03.2017	0.22	1	0.0033	0.44	[-1]	Group167	51.9553	93	[AKT1, AKT2, AKT3, ATP6AP1, ATP6V0C, ATP6V1H, BAD, BAX, BID, C3, CALM1, CALM2, CALM3, CALML6, CAMK2A, CAMK2G, CAMP, CASP10, CASP3, CD14, CD74, CEBPB, CEBPG, CLEC4M, CREB1, CREBBP, CYCS, EEA1, EP300, FCER1G, FCGR2A, FCGR2C, FCGR3A, HLA-DMA, HLA-DMB, HLA-DOA, HLA-DPA1, HLA-DPB1, HLA-DQA1, HLA-DQB1, HLA-DRA, HLA-DRB1, HLA-DRB3, HLA-DRB4, HLA-DRB5, HSPA9, HSPD1, IFNA4, IFNGR1, IFNGR2, IL10RB, IL6, IR…
GO:0004940	Type I diabetes mellitus	KEGG_17.03.2017	0.16	1	0.89	1	[-1]	Group170	58.1395	25	[CD28, FAS, GZMB, HLA-A, HLA-B, HLA-C, HLA-DMA, HLA-DMB, HLA-DOA, HLA-DPA1, HLA-DPB1, HLA-DQA1, HLA-DQB1, HLA-DRA, HLA-DRB1, HLA-DRB3, HLA-DRB4, HLA-DRB5, HLA-E, HLA-F, HSPD1, ICA1, INS, PTPRN, TNF]
GO:0004930	Type II diabetes mellitus	KEGG_17.03.2017	0.37	1	0.37	1	[-1]	Group114	54.3478	25	[ABCC8, CACNA1A, CACNA1C, HK1, HKDC1, INS, INSR, IRS1, IRS2, MAFA, MAPK10, MAPK3, MAPK8, MTOR, PIK3CA, PIK3R2, PKLR, PKM, PRKCD, PRKCE, PRKCZ, SOCS1, SOCS3, SOCS4, TNF]
GO:0000350	Tyrosine metabolism	KEGG_17.03.2017	0.13	1	0.18	1	[-1]	Group144	34.2857	12	[ADH1C, ALDH3B1, AOC3, AOX1, COMT, DCT, FAH, FAHD1, GOT2, HGD, MIF, TH]
GO:0000130	Ubiquinone and other terpenoid-quinone biosynthesis	KEGG_17.03.2017	1	1	1	1	[-1]	Group079	45.4545	5	[COQ3, COQ5, GGCX, VKORC1, VKORC1L1]
GO:0004120	Ubiquitin mediated proteolysis	KEGG_17.03.2017	5.8e-06	0.0015	5.8e-06	0.00089	[-1]	Group036	66.4234	91	[AIRE, ANAPC1, ANAPC10, ANAPC11, ANAPC2, ANAPC4, BIRC2, BIRC6, BTRC, CBL, CDC16, CDC23, CDC26, CDC27, CUL2, CUL3, CUL4A, CUL4B, CUL5, DDB1, DDB2, DET1, ELOC, ERCC8, FANCL, FBXO4, FBXW11, FBXW7, FBXW8, FZR1, HERC1, HERC2, HERC4, ITCH, KLHL9, MAP3K1, MDM2, MGRN1, MID1, NEDD4L, NHLRC1, PARK2, PIAS1, PIAS2, PML, PPIL2, RBX1, RCHY1, RFWD2, RNF7, SAE1, SIAH1, SKP1, SMURF2, SOCS1, SOCS3, STUB1, SYVN1, T…
GO:0004370	VEGF signaling pathway	KEGG_17.03.2017	0.067	1	0.0081	1	[-1]	Group163	59.322	35	[AKT1, AKT2, AKT3, BAD, CDC42, HSPB1, JMJD7-PLA2G4B, KRAS, MAP2K1, MAPK11, MAPK12, MAPK3, MAPKAPK2, NFATC2, NOS3, NRAS, PIK3CA, PIK3R2, PLA2G4A, PLA2G4E, PLA2G4F, PPP3CA, PPP3CB, PPP3CC, PRKCA, PRKCB, PRKCG, PTGS2, PTK2, RAC1, RAC2, SH2D2A, SPHK1, SPHK2, VEGFA]
GO:0000280	Valine, leucine and isoleucine degradation	KEGG_17.03.2017	0.019	1	0.69	1	[-1]	Group162	64.5833	31	[AACS, ABAT, ACAA1, ACAA2, ACAD8, ACADM, ACADSB, ACAT1, ACAT2, ALDH3A2, ALDH6A1, ALDH7A1, ALDH9A1, AOX1, AUH, BCAT1, BCKDHB, DBT, ECHS1, HADH, HADHA, HADHB, HIBCH, HMGCL, HMGCS1, MCCC1, MCEE, MUT, OXCT1, PCCA, PCCB]
GO:0004270	Vascular smooth muscle contraction	KEGG_17.03.2017	0.4	1	0.97	1	[-1]	Group172	51.2397	62	[ACTG2, ADCY1, ADCY4, ADCY6, ADCY7, ADCY9, ADORA2B, ADRA1A, ARAF, BRAF, CACNA1C, CACNA1S, CALD1, CALM1, CALM2, CALM3, CALML6, CYP4A11, EDNRA, GNA11, GNA12, GNA13, GNAQ, GNAS, GUCY1A3, ITPR1, ITPR2, ITPR3, JMJD7-PLA2G4B, KCNMB2, KCNMB4, MAP2K1, MAPK3, MYL6, MYL9, MYLK, NPR1, NPR2, PLA2G10, PLA2G12A, PLA2G1B, PLA2G2D, PLA2G4A, PLA2G4E, PLA2G4F, PLA2G6, PLCB4, PPP1CB, PPP1CC, PPP1R12A, PPP1R14A, PRK…
GO:0004962	Vasopressin-regulated water reabsorption	KEGG_17.03.2017	0.033	1	0.033	1	[-1]	Group118	63.6364	28	[ADCY6, ADCY9, AQP3, AQP4, ARHGDIB, ARHGDIG, CREB1, CREB3L2, CREB3L4, CREB5, DCTN1, DCTN4, DCTN6, DYNC1H1, DYNC1I1, DYNC1I2, DYNC1LI2, DYNC2H1, DYNLL1, DYNLL2, GNAS, NSF, PRKACA, PRKACB, RAB11A, RAB5A, STX4, VAMP2]
GO:0005110	Vibrio cholerae infection	KEGG_17.03.2017	0.2	1	0.3	1	[-1]	Group155	56.8627	29	[ACTB, ACTG1, ADCY9, ATP6AP1, ATP6V0C, ATP6V0E1, ATP6V1A, ATP6V1B2, ATP6V1C1, ATP6V1C2, ATP6V1D, ATP6V1E2, ATP6V1G1, ATP6V1H, ERO1A, GNAS, KDELR1, KDELR2, KDELR3, MUC2, PDIA4, PRKACA, PRKACB, PRKCA, SEC61B, SEC61G, TCIRG1, TJP1, TJP2]
GO:0005203	Viral carcinogenesis	KEGG_17.03.2017	0.51	1	0.51	1	[-1]	Group003	49.7512	100	[ATF4, BAD, BAK1, BAX, C3, CASP3, CCND1, CCND2, CCNE2, CCR5, CDC42, CDK6, CDKN1B, CDKN2A, CREB1, CREB3L2, CREB3L4, CREB5, CREBBP, DDB1, DDX3X, DLG1, DNAJA3, EGR2, EP300, GRB2, GTF2A2, GTF2E1, GTF2E2, GTF2H2C_2, GTF2H4, H2BFM, HDAC1, HDAC2, HDAC3, HDAC5, HDAC7, HIST1H2BC, HIST1H2BL, HIST1H4A, HIST1H4B, HIST1H4C, HIST1H4K, HIST2H2BF, HIST3H2BB, HIST4H4, HLA-A, HLA-B, HLA-C, HLA-E, HLA-F, HNRNPK, HP…
GO:0005416	Viral myocarditis	KEGG_17.03.2017	0.0038	0.89	0.89	1	[-1]	Group170	66.1017	39	[ABL1, ABL2, ACTB, ACTG1, BID, CASP3, CAV1, CCND1, CD28, CD40, CD55, CYCS, DAG1, DMD, EIF4G2, HLA-A, HLA-B, HLA-C, HLA-DMA, HLA-DMB, HLA-DOA, HLA-DPA1, HLA-DPB1, HLA-DQA1, HLA-DQB1, HLA-DRA, HLA-DRB1, HLA-DRB3, HLA-DRB4, HLA-DRB5, HLA-E, HLA-F, ICAM1, ITGB2, RAC1, RAC2, SGCA, SGCB, SGCD]
GO:0000750	Vitamin B6 metabolism	KEGG_17.03.2017	0.43	1	0.43	1	[-1]	Group040	66.6667	4	[AOX1, PDXK, PDXP, PNPO]
GO:0004977	Vitamin digestion and absorption	KEGG_17.03.2017	0.83	1	0.83	1	[-1]	Group124	50	12	[ABCC1, APOA1, BTD, LMBRD1, MMACHC, SCARB1, SLC19A1, SLC19A2, SLC19A3, SLC46A1, SLC5A6, TCN2]
GO:0004310	Wnt signaling pathway	KEGG_17.03.2017	0.61	1	0.97	1	[-1]	Group172	49.6503	71	[AXIN1, BTRC, CACYBP, CAMK2A, CAMK2G, CCND1, CCND2, CREBBP, CSNK1A1, CSNK1E, CSNK2A1, CSNK2A2, CTBP1, CTBP2, CTNNB1, CTNNBIP1, DAAM1, DAAM2, DVL1, EP300, FBXW11, FZD1, FZD10, FZD5, FZD6, FZD7, FZD8, FZD9, INVS, JUN, LEF1, MAP3K7, MAPK10, MAPK8, MYC, NFATC1, NFATC2, NFATC4, NLK, PLCB4, PORCN, PPARD, PPP3CA, PPP3CB, PPP3CC, PRICKLE1, PRICKLE2, PRKACA, PRKACB, PRKCA, PRKCB, PRKCG, RAC1, RAC2, RBX1, …
GO:0000592	alpha-Linolenic acid metabolism	KEGG_17.03.2017	0.69	1	0.36	1	[-1]	Group161	52	13	[ACAA1, ACOX1, FADS2, JMJD7-PLA2G4B, PLA2G10, PLA2G12A, PLA2G16, PLA2G1B, PLA2G2D, PLA2G4A, PLA2G4E, PLA2G4F, PLA2G6]
GO:0000410	beta-Alanine metabolism	KEGG_17.03.2017	0.71	1	0.033	1	[-1]	Group157	51.6129	16	[ABAT, ACADM, ALDH3A2, ALDH3B1, ALDH6A1, ALDH7A1, ALDH9A1, AOC3, CARNS1, DPYD, ECHS1, HADHA, HIBCH, SMOX, SMS, SRM]
GO:0004024	cAMP signaling pathway	KEGG_17.03.2017	0.11	1	0.97	1	[-1]	Group172	53.0303	105	[ACOX1, ADCY1, ADCY4, ADCY6, ADCY7, ADCY9, AFDN, AKT1, AKT2, AKT3, ARAP3, ATP1A1, ATP1A4, ATP1B1, ATP1B2, ATP1B3, ATP2A2, ATP2B4, BAD, BRAF, CACNA1C, CACNA1S, CALM1, CALM2, CALM3, CALML6, CAMK2A, CAMK2G, CAMK4, CNGA2, CNGA4, CNGB1, CREB1, CREB3L2, CREB3L4, CREB5, CREBBP, EDNRA, EP300, FFAR2, FOS, GHSR, GIPR, GLI1, GLI3, GNAI1, GNAI2, GNAI3, GNAS, GPR119, GRIA1, GRIA3, GRIN2A, GRIN2C, GRIN2D, GRIN…
GO:0004022	cGMP-PKG signaling pathway	KEGG_17.03.2017	0.23	1	0.97	1	[-1]	Group172	52.1472	85	[ADCY1, ADCY4, ADCY6, ADCY7, ADCY9, ADRA1A, ADRA2B, ADRA2C, AKT1, AKT2, AKT3, ATF4, ATP1A1, ATP1A4, ATP1B1, ATP1B2, ATP1B3, ATP2A1, ATP2A2, ATP2B4, BAD, BDKRB2, CACNA1C, CACNA1S, CALM1, CALM2, CALM3, CALML6, CNGB1, CREB1, CREB3L2, CREB3L4, CREB5, EDNRA, GATA4, GNA11, GNA12, GNA13, GNAI1, GNAI2, GNAI3, GNAQ, GTF2I, GUCY1A3, INS, INSR, IRS1, IRS2, ITPR1, ITPR2, ITPR3, KCNMB2, KCNMB4, MAP2K1, MAPK3,…
GO:0003015	mRNA surveillance pathway	KEGG_17.03.2017	0.025	1	0.025	1	[-1]	Group058	59.3407	54	[ALYREF, CASC3, CPSF1, CPSF3, CPSF4, CPSF7, CSTF1, CSTF2T, CSTF3, DAZAP1, EIF4A3, ETF1, FIP1L1, GSPT1, GSPT2, HBS1L, MAGOHB, MSI1, MSI2, NCBP1, NCBP2, NUDT21, NXF1, NXF3, NXT1, NXT2, PABPC1, PABPC3, PABPC4, PABPC5, PAPOLG, PELO, PPP1CB, PPP1CC, PPP2CA, PPP2R2A, PPP2R3A, PPP2R3C, PPP2R5B, PPP2R5C, PPP2R5E, RBM8A, RNGTT, RNMT, RNPS1, SAP18, SMG1, SRRM1, SYMPK, UPF1, UPF2, UPF3A, UPF3B, WDR33]
GO:0004150	mTOR signaling pathway	KEGG_17.03.2017	0.0007	0.17	0.0007	0.1	[-1]	Group078	60.9272	92	[AKT1, AKT1S1, AKT2, AKT3, ATP6V1A, ATP6V1B2, ATP6V1C1, ATP6V1C2, ATP6V1D, ATP6V1E2, ATP6V1G1, ATP6V1H, BRAF, CAB39, CAB39L, CLIP1, DDIT4, DVL1, EIF4B, EIF4E, EIF4E2, EIF4EBP1, FLCN, FNIP2, FZD1, FZD10, FZD5, FZD6, FZD7, FZD8, FZD9, GRB10, GRB2, IGF1, IGF1R, INS, INSR, IRS1, KRAS, LAMTOR2, LAMTOR3, LAMTOR4, LAMTOR5, LPIN1, MAP2K1, MAPK3, MAPKAP1, MLST8, MTOR, NPRL3, NRAS, PDPK1, PIK3CA, PIK3R2, P…
GO:0004115	p53 signaling pathway	KEGG_17.03.2017	0.22	1	0.22	1	[-1]	Group028	55.0725	38	[ATM, ATR, BAX, BID, CASP3, CCND1, CCND2, CCNE2, CCNG1, CCNG2, CD82, CDK6, CDKN2A, CYCS, DDB2, FAS, GADD45A, GADD45B, GADD45G, IGF1, IGFBP3, MDM2, PERP, PIDD1, PPM1D, PTEN, RCHY1, RFWD2, RRM2B, SERPINE1, SESN1, SFN, SHISA5, SIAH1, STEAP3, THBS1, TNFRSF10B, TP53AIP1]

## Sheet: Wikipathways Transcriptomics
GOID	GOTerm	Ontology Source	Term PValue	Term PValue Corrected with Bonferroni step down	Group PValue	Group PValue Corrected with Bonferroni step down	GOLevels	GOGroups	% Associated Genes	Nr. Genes	Associated Genes Found
GO:0000455	GPCRs, Class A Rhodopsin-like	WikiPathways_08.11.2016	1.1e-10	2.6e-08	1.1e-10	2.2e-08	[-1]	Group050	29.4574	76	[ACKR3, ADORA2B, ADRA1A, ADRA2B, ADRA2C, APLNR, BDKRB1, BDKRB2, C3AR1, CCR5, CCRL2, CHRM4, CMKLR1, CNR1, CNR2, CXCR1, CXCR2, CXCR4, CYSLTR1, EDNRA, FFAR2, FPR1, FPR2, GHSR, GPER1, GPR15, GPR161, GPR17, GPR171, GPR25, GPR3, GPR34, GPR35, GPR45, GPR50, GPR52, GPR68, HCAR3, HRH1, HRH2, HTR1B, HTR1D, HTR2A, HTR6, MC1R, MC2R, MC3R, NPBWR1, NPY2R, NPY4R, OPN1SW, OPN3, OPN4, OPRL1, OR10H2, OR11A1, OR14J…
GO:0000477	Cytoplasmic Ribosomal Proteins	WikiPathways_08.11.2016	8.6e-10	2e-07	8.6e-10	1.7e-07	[-1]	Group054	80.2198	73	[FAU, MRPL19, RPL10, RPL10A, RPL11, RPL13, RPL13A, RPL15, RPL17, RPL18, RPL18A, RPL19, RPL21, RPL22, RPL23, RPL23A, RPL24, RPL26, RPL27, RPL28, RPL29, RPL30, RPL31, RPL32, RPL34, RPL35, RPL35A, RPL36A, RPL37A, RPL38, RPL39, RPL41, RPL5, RPL6, RPL7, RPL7A, RPL8, RPL9, RPLP0, RPLP1, RPLP2, RPS10, RPS11, RPS13, RPS14, RPS15, RPS15A, RPS16, RPS17, RPS18, RPS19, RPS2, RPS20, RPS21, RPS23, RPS24, RPS25…
GO:0001545	miRNAs involved in DNA damage response	WikiPathways_08.11.2016	2.3e-06	0.00054	2.3e-06	0.00046	[-1]	Group056	16	8	[ABL1, ATM, CCND1, CDK6, CDKN1B, CREB1, H2AFX, MYC]
GO:0002029	Cell Differentiation - Index	WikiPathways_08.11.2016	4.8e-06	0.0011	4.8e-06	0.00096	[-1]	Group123	13.1579	5	[HDAC5, MEF2B, MEF2D, STAT3, TLX3]
GO:0002371	Parkinsons Disease Pathway	WikiPathways_08.11.2016	8.1e-06	0.0018	8.1e-06	0.0015	[-1]	Group159	25	21	[CASP2, CASP3, CASP6, CASP7, CCNE2, CYCS, EPRS, LRRK2, MAPK11, MAPK12, PARK2, SLC6A3, SNCAIP, TH, UBE2G1, UBE2G2, UBE2J1, UBE2J2, UBE2L3, UBE2L6, UCHL1]
GO:0002059	Alzheimers Disease	WikiPathways_08.11.2016	8.7e-06	0.002	8.7e-06	0.0017	[-1]	Group127	30.8725	46	[ADAM10, APH1A, APOE, APP, ATF6, ATP2A1, ATP2A2, BACE1, BAD, BID, CACNA1C, CACNA1S, CALM1, CALM2, CALM3, CAPN2, CASP3, CASP7, CHP1, CYCS, EIF2AK3, FAS, GAPDH, GNAQ, GRIN2A, GRIN2C, GRIN2D, IDE, ITPR1, ITPR2, ITPR3, LPL, MAPK3, MAPT, MIR9-3HG, MME, NAE1, NCSTN, NOS1, PLCB4, PPP3CA, PPP3CB, PPP3CC, TNF, USMG5, VMP1]
GO:0000366	TGF-beta Signaling Pathway	WikiPathways_08.11.2016	2.1e-05	0.0049	2.1e-05	0.0041	[-1]	Group006	66.9173	89	[AKT1, APP, ATF3, AXIN1, BCAR1, BTRC, CAV1, CCND1, CDC42, COL1A2, CREBBP, DAB2, DCP1A, EID2, EP300, ETS1, FN1, FOS, FOSB, FOXH1, FOXP3, GRB2, HDAC1, HGS, ITCH, ITGB1, ITGB4, JUN, JUNB, KLF10, KLF6, MAP2K1, MAP2K3, MAP2K4, MAP2K6, MAP3K7, MAP4K1, MAPK4, MAPK8, MET, MMP1, MYC, NEDD4L, NUP153, NUP214, PAK2, PDK1, PIAS1, PIAS2, PIK3R2, PJA1, PML, PPM1A, PTK2, RAC1, RBL2, RBX1, RHOA, RNF111, ROCK1, RU…
GO:0000437	EGF/EGFR Signaling Pathway	WikiPathways_08.11.2016	2.2e-05	0.0051	2.2e-05	0.0043	[-1]	Group047	65.2439	107	[ABI1, ABL1, AKT1, AP2B1, AP2M1, AP2S1, ARF6, ASAP1, ATF1, BCAR1, BRAF, CAMK2A, CAV1, CAV2, CBL, CDC42, CREB1, CRKL, CSK, DNM1, EGFR, EIF4EBP1, ELK1, EPN1, EPS15, EPS15L1, ERBB2, ERRFI1, FOS, FOSB, FOXO1, GAB1, GJA1, GRB10, GRB2, HGS, INPP5D, INPPL1, IQGAP1, IQSEC1, ITCH, JAK2, JUN, KRAS, MAP2K1, MAP2K5, MAP3K1, MAP3K2, MAP3K3, MAP4K1, MAPK4, MAPK8, MEF2D, MTOR, MYBL2, NCK1, NCK2, NDUFA13, NEDD8,…
GO:0000306	Focal Adhesion	WikiPathways_08.11.2016	4e-05	0.0093	5.4e-05	0.01	[-1]	Group251	63.2653	124	[ACTB, ACTG1, AKT1, AKT2, AKT3, ARAF, ARHGAP5, BAD, BCAR1, BIRC2, BRAF, CAV1, CAV2, CCND1, CCND2, CDC42, CHAD, COL11A1, COL11A2, COL1A1, COL1A2, COL2A1, COL3A1, COL5A1, COL5A2, COL6A2, COMP, CTNNB1, DIAPH1, DOCK1, EGFR, ELK1, ERBB2, FGR, FLNA, FN1, GRB2, HCK, IBSP, IGF1, IGF1R, ITGA10, ITGA11, ITGA2B, ITGA5, ITGA6, ITGA7, ITGAE, ITGAM, ITGAV, ITGAX, ITGB1, ITGB2, ITGB4, ITGB5, ITGB7, ITGB8, JUN, …
GO:0000481	Insulin Signaling	WikiPathways_08.11.2016	5.5e-05	0.012	5.5e-05	0.01	[-1]	Group055	64.5963	104	[AKT1, AKT2, ARF6, ARHGAP33, CAP1, CBL, CYTH3, EGR1, EIF4E, EIF4EBP1, ELK1, ENPP1, FLOT2, FOS, FOXO1, FOXO3, GAB1, GRB10, GRB14, GRB2, GSK3A, GYG1, IGF1R, INPPL1, INSR, IRS1, IRS2, JUN, KIF3A, KIF5B, MAP2K1, MAP2K3, MAP2K4, MAP2K5, MAP2K6, MAP2K7, MAP3K1, MAP3K2, MAP3K3, MAP3K5, MAP3K6, MAP3K7, MAP3K8, MAP3K9, MAP4K1, MAP4K3, MAP4K4, MAP4K5, MAPK10, MAPK11, MAPK12, MAPK3, MAPK4, MAPK6, MAPK8, MTO…
GO:0002380	Brain-Derived Neurotrophic Factor (BDNF) signaling pathway	WikiPathways_08.11.2016	6.3e-05	0.014	6.3e-05	0.012	[-1]	Group163	65.2778	94	[ACACB, AKT1, ALPL, BAD, BCL2L11, BMP2, CAMK2A, CAMK4, CASP3, CDC42, CDH2, CDKL5, CNR1, CREB1, CRTC1, CSNK2A1, CTNNB1, CYFIP1, DLG1, DOCK3, DPYSL2, EEF2, EGR1, EGR2, EIF2S1, EIF2S2, EIF4E, EIF4EBP1, ELK1, FOS, FOXO3, GABRB3, GRB2, GRIA1, GRIA3, IRS1, IRS2, JAK2, JUN, KCNN2, KIDINS220, MAP2K1, MAP2K5, MAP3K1, MAP3K2, MAPK10, MAPK3, MAPK8, MAPT, MARCKS, MTOR, NCAM1, NCF1, NCF2, NCK1, NCK2, NFATC4, …
GO:0000411	mRNA Processing	WikiPathways_08.11.2016	0.0002	0.047	0.0002	0.039	[-1]	Group046	64.6617	86	[CELF2, CLASRP, CLK1, CLK2, CLK3, CLK4, CPSF1, CPSF3, CPSF4, CSTF1, CSTF2T, CSTF3, DDX1, DHX15, DICER1, DNAJC8, EFTUD2, HNRNPA1, HNRNPA2B1, HNRNPC, HNRNPD, HNRNPH1, HNRNPH2, HNRNPK, HNRNPL, HNRNPM, HNRNPR, HNRNPU, LSM2, LSM7, METTL3, NCBP1, NCBP2, NONO, NUDT21, NXF1, PCBP2, PRMT1, PRMT2, PRPF18, PRPF4, PRPF40A, PRPF4B, PRPF6, PRPF8, PSKH1, PTBP1, PTBP2, RBM17, RBM5, RBMX, RNGTT, RNMT, RNPS1, SF3A…
GO:0000117	GPCRs, Other	WikiPathways_08.11.2016	0.00023	0.051	0.00023	0.043	[-1]	Group107	29.7872	28	[ACKR1, ADGRF5, ADGRL2, ALG6, CCR5, CELSR1, CELSR2, CNR1, CXCR1, CXCR2, EDNRA, GPR162, GPR17, GPR176, GPR61, GPR62, GPR88, HTR2A, LTB4R2, MCHR2, OR1N1, OR2B6, OR2H1, OR3A3, PROKR2, PTGFR, SSTR2, UTS2R]
GO:0001982	Sterol Regulatory Element-Binding Proteins (SREBP) signalling	WikiPathways_08.11.2016	0.00034	0.076	0.00034	0.063	[-1]	Group113	69.863	51	[ACACA, ACSS1, AKT1, AMFR, ATF6, CAMP, CREB1, CYP51A1, DBI, FDPS, GSK3A, HMGCR, HMGCS1, INS, INSIG1, INSIG2, KPNB1, LDLR, LPIN1, LPL, LSS, MBTPS1, MDH1, MTOR, NR1H2, PIK3CA, PRKAA1, PRKAA2, PRKAB2, PRKACA, PRKAG1, PRKAG2, PRKAG3, RBP4, RNF139, SAR1A, SAR1B, SCARB1, SCD, SEC13, SEC23A, SEC24A, SEC24B, SEC24D, SEC31A, SEC31B, SP1, SQLE, SREBF1, SREBF2, YY1]
GO:0000024	Peptide GPCRs	WikiPathways_08.11.2016	0.00039	0.087	0.00039	0.072	[-1]	Group172	28.3784	21	[ACKR1, BDKRB1, BDKRB2, C3AR1, CCR5, CXCR1, CXCR2, CXCR4, EDNRA, FPR1, FPR2, GHSR, MC1R, MC2R, MC3R, NPY2R, NPY4R, OPRL1, SSTR2, SSTR3, TAC4]
GO:0003286	Copper homeostasis	WikiPathways_08.11.2016	0.00053	0.11	0.00053	0.099	[-1]	Group194	72.2222	39	[ADAM10, AKT1, APP, ATOX1, ATP7A, BACE1, CASP3, CCND1, CCS, COX11, COX17, FOXO1, FOXO3, JUN, MAPT, MDM2, MT1A, MT1B, MT1E, MT1F, MT1G, MT1H, MT1L, MT1X, MT2A, PIK3CA, PRNP, PTEN, SCO1, SLC31A2, SOD1, SOD3, SP1, STEAP1, STEAP2, STEAP3, STEAP4, XAF1, XIAP]
GO:0002324	AGE/RAGE pathway	WikiPathways_08.11.2016	0.00071	0.15	0.00071	0.13	[-1]	Group148	69.697	46	[AGER, AKT1, ALPL, CASP3, CDC42, CYCS, DIAPH1, EGFR, EZR, FOXO1, HIF1A, INS, INSR, IRAK4, IRS1, JAK2, JUN, LGALS3, MAP2K1, MAPK3, MAPK8, MMP13, MMP2, MSN, MSR1, NCF1, NFKBIA, NOS2, NOS3, PLA2G4A, PRKCA, PRKCB, PRKCD, PRKCZ, RAC1, RELA, RHOA, ROCK1, SHC1, SMAD2, SMAD3, SOD1, SP1, STAT1, STAT3, STAT5B]
GO:0002249	Metastatic brain tumor	WikiPathways_08.11.2016	0.00096	0.21	0.00096	0.17	[-1]	Group135	17.8571	5	[CDC42, CDK6, E2F3, MIRLET7BHG, MYC]
GO:0001471	Target Of Rapamycin (TOR) Signaling	WikiPathways_08.11.2016	0.0013	0.29	0.0013	0.24	[-1]	Group229	75.6757	28	[AKT1, AKT1S1, CDC42, DDIT4, DDIT4L, EIF4EBP1, FKBP1A, HMGCR, MAPKAP1, MLST8, MTOR, PRKAA1, PRKAA2, PRKAB2, PRKAG1, PRKAG2, PRKAG3, PRKCA, RAC1, RHEB, RICTOR, RPS6KB1, RPTOR, RRAGA, RRAGB, RRAGD, TSC1, ULK2]
GO:0000410	Diurnally Regulated Genes with Circadian Orthologs	WikiPathways_08.11.2016	0.0014	0.31	0.0014	0.26	[-1]	Group045	71.4286	35	[AZIN1, BTG1, CBX3, CEBPB, CRY1, CRY2, DAZAP2, DNAJA1, EIF4G2, ETV6, GFRA1, GSTM3, GSTP1, HERPUD1, HLA-DMA, KLF9, NCKAP1, NCOA4, NR1D2, PER1, PER2, PPP1R3C, PSMA4, PURA, QKI, RBPMS, SF3A3, SUMO1, SUMO3, TAB2, TUBB3, UCP3, UGP2, VAPA, ZFR]
GO:0000035	G Protein Signaling Pathways	WikiPathways_08.11.2016	0.0014	0.3	0.12	1	[-1]	Group256	64.9485	63	[ADCY1, ADCY4, ADCY6, ADCY7, ADCY9, AKAP1, AKAP11, AKAP12, AKAP13, AKAP4, AKAP5, AKAP6, AKAP8, AKAP9, CALM1, CALM2, GNA11, GNA12, GNA13, GNAI1, GNAI2, GNAI3, GNAO1, GNAQ, GNAS, GNB1, GNB5, GNG10, GNG11, GNG12, GNG13, GNG7, GNG8, ITPR1, KRAS, NRAS, PDE1A, PDE1C, PDE4A, PDE4B, PDE4C, PDE4D, PDE8A, PDE8B, PPP3CA, PPP3CC, PRKACA, PRKACB, PRKAR1A, PRKAR1B, PRKAR2B, PRKCA, PRKCB, PRKCD, PRKCE, PRKCG, P…
GO:0000400	p38 MAPK Signaling Pathway	WikiPathways_08.11.2016	0.0015	0.33	0.0015	0.27	[-1]	Group039	76.4706	26	[CDC42, CREB1, ELK1, GRB2, HMGN1, HSPB1, MAP2K4, MAP2K6, MAP3K1, MAP3K5, MAP3K7, MAP3K9, MAPKAPK2, MAPKAPK5, MAX, MEF2D, MYC, PLA2G4A, RAC1, RIPK1, RPS6KA5, SHC1, STAT1, TGFBR1, TRADD, TRAF2]
GO:0000615	Senescence and Autophagy in Cancer	WikiPathways_08.11.2016	0.0015	0.34	0.0015	0.28	[-1]	Group074	64.1509	68	[AKT1S1, AMBRA1, ATG12, ATG13, ATG14, ATG5, BMI1, BMP2, BRAF, CCL3, CD44, CDKN1B, CDKN2A, CEBPB, COL10A1, COL1A1, COL3A1, CXCL1, CXCL14, FKBP8, FN1, GABARAP, GABARAPL1, GABARAPL2, IFI16, IGF1, IGF1R, IGFBP3, IGFBP5, IGFBP7, IL24, IL6, IL6ST, ING1, INHBA, INS, IRF5, IRF7, JUN, KMT2A, LAMP1, LAMP2, MAP1LC3A, MAP1LC3B, MAP2K1, MAP2K3, MDM2, MLST8, MTOR, PCNA, PIK3C3, PLAT, PTEN, RB1, RB1CC1, RNASEL,…
GO:0002034	Leptin signaling pathway	WikiPathways_08.11.2016	0.0016	0.34	2.8e-06	0.00056	[-1]	Group263	67.1053	51	[ACACA, ACACB, AKT1, BAD, BAX, CCND1, CDC42, CFL2, CREB1, EIF4E, EIF4EBP1, ELK1, ERBB2, ESR1, FOXO1, GRB2, GSK3A, IL1RN, IRS1, JAK2, KHDRBS1, KPNA4, LEPR, MAP2K1, MAPK3, MAPK8, MTOR, NOS3, PDE3B, PIK3R2, PRKAA1, PRKAA2, PTEN, PTK2, PTPN1, PTPN11, RAC1, REL, RELA, RHOA, ROCK1, ROCK2, RPS6, RPS6KA1, RPS6KB1, SHC1, SOCS3, SP1, STAT1, STAT3, STAT5B]
GO:0001528	Physiological and Pathological Hypertrophy of the Heart	WikiPathways_08.11.2016	0.002	0.43	0.92	1	[-1]	Group254	80	20	[AGT, CALM1, CALM2, EDN1, FOS, GATA4, IL6ST, JUN, LIFR, MAP2K3, MAPK11, MAPK8, NFATC4, PPP3CA, PPP3CB, PRKCB, PRKCE, RAC1, RHOA, STAT3]
GO:0000474	Endochondral Ossification	WikiPathways_08.11.2016	0.0025	0.53	0.0025	0.44	[-1]	Group053	67.6923	44	[ACAN, ADAMTS1, ADAMTS4, ADAMTS5, AKT1, ALPL, BMP6, BMPR1A, CAB39, CALM1, CALM2, CHST11, COL10A1, COL2A1, DDR2, ENPP1, FGF2, FGFR1, FRZB, GH1, GLI3, HMGCS1, IGF1, IGF1R, KIF3A, MGP, MMP13, NKX3-2, PLAT, PRKACA, RUNX2, RUNX3, SERPINH1, SLC38A2, SOX5, SOX6, SOX9, SPP1, STAT1, STAT5B, TGFB1, THRA, TIMP3, VEGFA]
GO:0002272	Pathogenic Escherichia coli infection	WikiPathways_08.11.2016	0.0026	0.55	0.0026	0.46	[-1]	Group139	69.0909	38	[ABL1, ACTB, ACTG1, ARPC1B, ARPC2, ARPC5, CD14, CDC42, CDH1, CTNNB1, CTTN, EZR, HCLS1, ITGB1, LY96, NCK1, NCK2, NCL, PRKCA, RHOA, ROCK1, ROCK2, TLR5, TUBA1B, TUBA1C, TUBA3C, TUBA8, TUBB, TUBB2A, TUBB2B, TUBB3, TUBB4A, TUBB4B, TUBB6, WAS, WASL, YWHAQ, YWHAZ]
GO:0000111	Electron Transport Chain	WikiPathways_08.11.2016	0.003	0.64	0.00071	0.13	[-1]	Group241	63.2075	67	[ATP5A1, ATP5C1, ATP5E, ATP5F1, ATP5G1, ATP5G2, ATP5G3, ATP5H, ATP5I, ATP5J, ATP5J2, ATP5L, ATP5O, ATP5S, ATPIF1, COX11, COX17, COX4I1, COX6A1, COX6A2, COX6B1, COX6C, COX7A1, COX7A2, COX7A2L, COX7B, COX7C, COX8A, NDUFA1, NDUFA10, NDUFA12, NDUFA3, NDUFA5, NDUFA7, NDUFA8, NDUFA9, NDUFAB1, NDUFB2, NDUFB3, NDUFB4, NDUFB5, NDUFB6, NDUFB8, NDUFC1, NDUFC2, NDUFS1, NDUFS5, NDUFS6, NDUFS7, NDUFV1, NDUFV2,…
GO:0002261	Signaling Pathways in Glioblastoma	WikiPathways_08.11.2016	0.0037	0.78	0.0037	0.65	[-1]	Group137	65.0602	54	[AKT1, AKT2, AKT3, ARAF, ATM, BRAF, CBL, CCND1, CCND2, CDK6, CDKN1B, CDKN2A, CDKN2C, EGFR, EP300, ERBB2, ERRFI1, FGFR1, FOXO1, FOXO3, GAB1, GRB2, IGF1R, IRS1, KRAS, MAP2K1, MAP2K3, MAP2K4, MAP2K5, MAP2K6, MAP2K7, MAPK3, MDM2, MET, MSH6, NF1, NRAS, PDGFRA, PDGFRB, PDPK1, PIK3C2A, PIK3C2G, PIK3CA, PIK3R2, PRKCA, PRKCB, PRKCD, PRKCG, PRKCI, PRKCQ, PRKCZ, PTEN, RB1, TSC1]
GO:0003614	Photodynamic therapy-induced HIF-1 survival signaling	WikiPathways_08.11.2016	0.0043	0.9	0.0043	0.75	[-1]	Group223	72.973	27	[ANGPT1, BAK1, BAX, BCL2A1, BID, BNIP3, BNIP3L, EDN1, EGLN1, HIF1A, HIF1AN, HK1, IGFBP2, IGFBP3, LDHA, MCL1, NOS2, PDHA1, PGK1, PKM, PTGS2, SERPINE1, SLC16A1, SLC2A1, SLC2A3, TGFB3, VEGFA]
GO:0000692	Sulfation Biotransformation Reaction	WikiPathways_08.11.2016	0.0045	0.94	0.0045	0.78	[-1]	Group082	15.7895	3	[PAPSS1, PAPSS2, SULT1C3]
GO:0000304	Kit receptor signaling pathway	WikiPathways_08.11.2016	0.006	1	2.8e-06	0.00056	[-1]	Group263	66.6667	40	[AKT1, BAD, BTK, CBL, CRKL, DOK1, EP300, FOS, FOXO3, GRB10, GRB2, GRB7, INPP5D, JAK2, JUNB, KIT, KITLG, LYN, MAP2K1, MAPK3, MAPK8, MAPT, MITF, PIK3R2, PRKCA, PRKCB, PTPN11, PTPN6, RPS6, RPS6KA1, RPS6KA3, RPS6KB1, SH2B2, SHC1, SNAI2, SOCS1, STAT1, STAT3, STAT5B, VAV1]
GO:0003874	Canonical and Non-Canonical TGF-B signaling	WikiPathways_08.11.2016	0.0063	1	0.0063	1	[-1]	Group030	82.3529	14	[BMPR1A, BMPR2, GREM1, LOX, LOXL1, LOXL2, LOXL4, MAPK8, SMAD2, SMAD3, SMAD4, TGFB1, TGFBR1, TGFBR2]
GO:0002916	Interactome of polycomb repressive complex 2 (PRC2)	WikiPathways_08.11.2016	0.0063	1	0.0063	1	[-1]	Group186	82.3529	14	[AEBP2, BCLAF1, EED, ELL, EZH1, EZH2, JARID2, MORC3, RBBP4, RBBP7, SETX, SUZ12, THRAP3, TRIM35]
GO:0000585	Interferon type I signaling pathways	WikiPathways_08.11.2016	0.0064	1	0.0064	1	[-1]	Group072	67.2727	37	[CBL, CREB1, CRKL, EIF4B, EIF4E, EIF4EBP1, IFNAR1, IRS1, IRS2, MAP2K3, MAP2K6, MAP3K1, MAPKAP1, MLST8, MTOR, PDCD4, PIAS1, PIK3R2, PRMT1, PTPN11, PTPN6, PTPRC, RAC1, RACK1, RAP1A, RAPGEF1, REL, RPS6, RPS6KA5, RPS6KB1, RPTOR, SOCS1, SOCS3, STAT1, STAT2, STAT3, VAV1]
GO:0001984	Integrated Breast Cancer Pathway	WikiPathways_08.11.2016	0.0067	1	0.0067	1	[-1]	Group114	59.7403	92	[ABL1, AHR, AKT1, ANXA1, ARAF, ATF1, ATM, ATR, BACH1, BAD, BAK1, BAX, BID, BMPR1A, BMPR2, BRAF, CASP3, CCND1, CDC42, CDH1, CDK7, CREB1, CTNNB1, DAG1, DCAKD, DHTKD1, EDAR, EGFR, EP300, ESR1, FAU, FOXO1, GADD45A, GRN, GSK3A, HDAC1, HIPK2, HMGCR, IMPA1, IRS1, JUN, KRAS, LGALS13, MAP3K7CL, MAX, MDM2, MMP1, MSH2, MSH6, MTOR, MYC, NAB1, NF1, NUP85, ODC1, PAK1, PIAS1, PIGR, PIK3R2, PLK3, PML, PPP4R3B, P…
GO:0000691	Tamoxifen metabolism	WikiPathways_08.11.2016	0.0074	1	0.0074	1	[-1]	Group080	19.0476	4	[CYP1B1, CYP2E1, CYP3A5, FMO1]
GO:0000236	Adipogenesis	WikiPathways_08.11.2016	0.0078	1	0.0078	1	[-1]	Group154	60.3053	79	[AGPAT2, AGT, AHR, BMP2, BMP4, CEBPB, CEBPD, CFD, CISD1, CREB1, CTNNB1, CYP26B1, DLK1, DVL1, EBF1, EGR2, EPAS1, FAS, FOXO1, FRZB, FZD1, GADD45A, GADD45B, GATA4, GDF10, GH1, GTF3A, HIF1A, ID3, IGF1, IL6, IL6ST, INS, IRS1, IRS2, KLF5, KLF6, KLF7, LIFR, LMNA, LPIN1, LPL, MBNL1, MEF2D, MIF, NAMPT, NCOA2, NCOR2, NDN, NR3C1, NRIP1, PCK2, PLIN2, PNPLA3, PPARD, PPARGC1A, PTGIS, RARA, RB1, RBL2, RETN, ROR…
GO:0002849	Hematopoietic Stem Cell Differentiation	WikiPathways_08.11.2016	0.0083	1	0.0083	1	[-1]	Group166	29.1667	14	[ABO, CSF1, CSF2, CXCR4, FLI1, FOS, IL6, ITGA2B, KITLG, MXI1, NFATC2, RIOK3, RUNX1, VAV1]
GO:0002374	Oncostatin M Signaling Pathway	WikiPathways_08.11.2016	0.0088	1	2.8e-06	0.00056	[-1]	Group263	65.1515	43	[AKT1, CASP3, CASP7, CDKN1B, CEBPB, CREB1, CYR61, EGR1, FOS, GRB2, HIF1A, IL6ST, IRS1, JAK2, JAK3, JUNB, KRAS, LDLR, LIFR, MAP2K1, MAPK3, MAPK8, MMP1, MMP13, MTOR, NFKBIA, PRKCA, PRKCB, PRKCD, PRKCE, PTK2B, PTPN11, RELA, RICTOR, RPS6, SERPINE1, SHC1, SOCS3, STAT1, STAT3, STAT5B, TIMP3, VEGFA]
GO:0000185	Integrin-mediated Cell Adhesion	WikiPathways_08.11.2016	0.0097	1	5.4e-05	0.01	[-1]	Group251	61.5385	64	[AKT1, AKT2, AKT3, ARAF, ARHGEF7, BCAR1, BRAF, CAPN10, CAPN2, CAPN7, CAPN9, CAV1, CAV2, CDC42, CSK, DOCK1, GIT2, GRB2, ITGA10, ITGA11, ITGA2B, ITGA5, ITGA6, ITGA7, ITGAE, ITGAM, ITGAV, ITGAX, ITGB1, ITGB2, ITGB4, ITGB5, ITGB7, ITGB8, MAP2K1, MAP2K3, MAP2K5, MAP2K6, MAPK10, MAPK12, MAPK4, MAPK6, PAK1, PAK2, PAK4, PAK6, PDPK1, PIK3R2, PTK2, RAC1, RAC2, RAP1A, RAP1B, RAPGEF1, ROCK1, ROCK2, SELENOP, …
GO:0000404	Nucleotide Metabolism	WikiPathways_08.11.2016	0.01	1	0.01	1	[-1]	Group041	78.9474	15	[ADSL, ADSS, DHFR, HPRT1, IMPDH1, MTHFD2, NME2, OAZ1, POLA1, PRPS1, PRPS2, RRM1, RRM2B, SAT1, SRM]
GO:0003611	Photodynamic therapy-induced AP-1 survival signaling.	WikiPathways_08.11.2016	0.011	1	0.011	1	[-1]	Group220	66.6667	34	[BAK1, BAX, BCL2L11, BCL3, BID, CCND1, CDKN2A, CFLAR, EGFR, ELK1, FAS, FGF7, FOS, HBEGF, HSP90AA1, IL6, JUN, JUNB, MAP2K3, MAP2K4, MAP2K6, MAP2K7, MAP3K5, MAPK11, MAPK12, MAPK8, MCL1, MMP2, PDGFRA, RB1, TNF, TNFSF10, TRAF2, TRAF5]
GO:0000702	Metapathway biotransformation	WikiPathways_08.11.2016	0.012	1	0.0099	1	[-1]	Group243	39.4444	71	[AKR1A1, AKR1B1, AKR1C1, AKR1C3, AKR1C4, AKR7A2, CHST1, CHST10, CHST11, CHST12, CHST13, CHST2, CHST3, CHST6, COMT, CYP11A1, CYP11B1, CYP1B1, CYP20A1, CYP21A2, CYP26B1, CYP26C1, CYP27A1, CYP27C1, CYP2A13, CYP2B6, CYP2E1, CYP2R1, CYP2S1, CYP2U1, CYP2W1, CYP39A1, CYP3A5, CYP4B1, CYP4F22, CYP4X1, CYP51A1, FMO1, FMO2, FMO5, GAL3ST2, GAL3ST4, GLYAT, GLYATL1, GPX2, GPX3, GSTA4, GSTK1, GSTM3, GSTM5, GSTO…
GO:0000138	Androgen receptor signaling pathway	WikiPathways_08.11.2016	0.014	1	0.014	1	[-1]	Group151	61.5385	56	[AKT1, BAG1, CALR, CAV1, CCND1, CDC42, CREB1, CREBBP, CTNNB1, DSTN, EGFR, EP300, FHL2, FKBP4, FLNA, FOXO1, HDAC1, JUN, KAT2B, KDM1A, MDM2, NCOA2, NCOA4, NCOR2, NR0B2, PAK6, PIAS1, PIAS2, PIK3R2, PRDX1, PTEN, PTK2, RAC1, RACK1, RAD9A, RAN, RB1, RELA, RHOA, RHOB, RNF14, RNF4, RNF6, ROCK1, ROCK2, RUNX2, SMAD3, SMAD4, SMARCE1, SP1, STAT3, STUB1, SUMO1, TGIF1, ZMIZ1, ZNF318]
GO:0000364	IL-6 signaling pathway	WikiPathways_08.11.2016	0.014	1	2.8e-06	0.00056	[-1]	Group263	67.4419	29	[AGT, AKT1, BAD, CREBBP, GAB1, GRB2, HCK, HDAC1, IL6, IL6ST, JAK2, JUNB, MAP2K1, MAP2K4, MAP3K7, MAPK3, NLK, NR2F6, PIK3R2, PRDM1, PRKCD, PTPN11, RAC1, RPS6KB1, SHC1, SOCS3, STAT1, STAT3, VAV1]
GO:0002526	PDGF Pathway	WikiPathways_08.11.2016	0.014	1	0.0021	0.37	[-1]	Group255	69.2308	27	[ARFIP2, CDC42, ELK1, FOS, GRB2, JUN, MAP2K1, MAP2K4, MAP3K1, MAPK3, MAPK8, NFKBIA, PAK1, PDGFA, PDGFRB, PLA2G4A, PTPN11, RAC1, RASA1, RHOA, SHC1, STAT1, STAT3, TIAM1, VAV1, VAV2, WASL]
GO:0002526	PDGF Pathway	WikiPathways_08.11.2016	0.014	1	2.8e-06	0.00056	[-1]	Group263	69.2308	27	[ARFIP2, CDC42, ELK1, FOS, GRB2, JUN, MAP2K1, MAP2K4, MAP3K1, MAPK3, MAPK8, NFKBIA, PAK1, PDGFA, PDGFRB, PLA2G4A, PTPN11, RAC1, RASA1, RHOA, SHC1, STAT1, STAT3, TIAM1, VAV1, VAV2, WASL]
GO:0002018	RANKL/RANK (Receptor activator of NFKB (ligand)) Signaling Pathway	WikiPathways_08.11.2016	0.014	1	0.027	1	[-1]	Group245	65.4545	36	[AKT1, AKT2, CALCR, CBL, CDC42, CTSK, FHL2, FOS, ICAM1, JUN, LYN, MAP2K1, MAP2K6, MAP2K7, MAP3K7, MAPK3, MAPK8, MITF, MTOR, NFATC1, NFKBIA, PAPSS2, PIK3R2, PTK2, RAC1, RELA, RELB, SQSTM1, STAT1, TAB2, TNFRSF11B, TNFSF11, TRAF1, TRAF2, TRAF5, VCAM1]
GO:0000313	Signaling of Hepatocyte Growth Factor Receptor	WikiPathways_08.11.2016	0.014	1	0.0021	0.37	[-1]	Group255	70.5882	24	[CRKL, DOCK1, ELK1, FOS, GAB1, GRB2, ITGB1, JUN, MAP2K1, MAP4K1, MAPK3, MAPK8, MET, PAK1, PIK3CA, PTEN, PTK2, PTK2B, PTPN11, RAP1A, RAP1B, RAPGEF1, RASA1, STAT3]
GO:0002377	Integrated Pancreatic Cancer Pathway	WikiPathways_08.11.2016	0.016	1	0.016	1	[-1]	Group160	57.3604	113	[ABL1, ACHE, AGPAT2, AKT1, ANXA1, APP, ATM, BAD, BAX, BID, BRF1, CAB39, CAMK2A, CAMP, CASP10, CASP3, CASP7, CCND1, CD82, CDKN1B, CREB1, CREBBP, CTNNB1, DAG1, EGFR, EGR1, EP300, ERBB2, ESR1, EZH2, FAS, FGF1, FGF2, FGFR1, FKBP1A, FKBP1B, FKBP3, FST, GADD45A, GPRC5A, GRB2, GSK3A, GTF2A2, HSP90AB1, IGF1, IGFBP3, IL11, IL1R1, INHBA, JUN, JUNB, KRAS, LIG1, LTBP1, MAP2K1, MAP3K5, MAPK3, MAPK4, MAPK8, MA…
GO:0003859	TGF-B Signaling in Thyroid Cells for Epithelial-Mesenchymal Transition	WikiPathways_08.11.2016	0.016	1	0.016	1	[-1]	Group026	77.7778	14	[AKT1, CDH1, CDH2, FN1, ID1, MAPK3, RUNX2, SMAD2, SMAD3, SMAD4, SNAI2, TGFB1, TNC, VIM]
GO:0002864	Apoptosis-related network due to altered Notch3 in ovarian cancer	WikiPathways_08.11.2016	0.019	1	0.019	1	[-1]	Group171	64.8148	35	[ABL1, AKT1, ANXA5, APOE, APP, AXIN1, BCL3, CASP7, CDKN1B, CTNNA1, CUL5, ETS1, HDAC1, HELLS, HSPA5, HSPB1, HSPD1, IER3, IL7R, PAK2, PKN1, PTK2, PTK2B, RIPK2, RNF7, RPS6KB1, SERBP1, SOCS3, SQSTM1, THBS1, TNF, TNFRSF10B, TRAF1, VIM, YBX3]
GO:0000697	Estrogen metabolism	WikiPathways_08.11.2016	0.019	1	0.019	1	[-1]	Group084	21.0526	4	[ARSD, COMT, CYP1B1, UGT1A6]
GO:0002879	Farnesoid X Receptor Pathway	WikiPathways_08.11.2016	0.019	1	0.019	1	[-1]	Group179	21.0526	4	[ABCB4, IRS2, NR0B2, PPARGC1A]
GO:0000382	MAPK Signaling Pathway	WikiPathways_08.11.2016	0.019	1	0.019	1	[-1]	Group017	57.6471	98	[AKT1, AKT2, AKT3, ATF4, BRAF, CASP2, CASP3, CASP6, CASP7, CD14, CDC42, CRKL, DUSP1, DUSP4, DUSP5, EGFR, ELK1, FAS, FGFR1, FLNA, FOS, GADD45A, GNA12, GRB2, HSPA1A, HSPA5, HSPB1, HSPB2, IL1R1, JUN, KRAS, LAMTOR3, LRRK2, MAP2K1, MAP2K3, MAP2K4, MAP2K5, MAP2K6, MAP2K7, MAP3K1, MAP3K2, MAP3K20, MAP3K5, MAP3K6, MAP3K7, MAP3K8, MAP4K1, MAP4K3, MAP4K4, MAPK10, MAPK12, MAPK3, MAPK4, MAPK6, MAPK8, MAPK8IP…
GO:0003303	Rac1/Pak1/p38/MMP-2 pathway	WikiPathways_08.11.2016	0.019	1	0.019	1	[-1]	Group201	63.2353	43	[AKT1, ANGPT1, ANGPT4, ANGPTL1, BAD, BAX, CASP7, CTNNB1, EGFR, EIF4EBP1, ERBB2, FN1, FOXO1, GRB14, GRB2, GRB7, ITGB1, KRAS, MAPK11, MAPK12, MAPK3, MAPK8, MSH2, MYC, NCK1, NFKBIA, NOS1, NOS2, NRAS, PAK1, PIK3CA, PTK2, PTPN11, RAC1, RAD51, RASA1, RELA, RS1, STAT3, STAT5B, STMN1, TNIP1, YAP1]
GO:0003893	Development and heterogeneity of the ILC family	WikiPathways_08.11.2016	0.02	1	0.02	1	[-1]	Group037	28.125	9	[AHR, AREG, BCL11B, ID2, IL6, NFIL3, RORA, TBX21, TNF]
GO:0003858	Toll-like Receptor Signaling	WikiPathways_08.11.2016	0.02	1	0.02	1	[-1]	Group025	28.125	9	[IRAK4, IRF7, REL, RELA, RELB, TICAM1, TLR5, TLR9, TOLLIP]
GO:0000550	Biogenic Amine Synthesis	WikiPathways_08.11.2016	0.021	1	0.044	1	[-1]	Group238	18.75	3	[ACHE, COMT, TH]
GO:0002359	Parkin-Ubiquitin Proteasomal System pathway	WikiPathways_08.11.2016	0.021	1	0.021	1	[-1]	Group153	62.8571	44	[CASK, FBXW7, HSPA1A, HSPA1B, HSPA1L, HSPA4, HSPA5, HSPA9, PARK2, PSMC1, PSMC3, PSMC4, PSMD1, PSMD10, PSMD12, PSMD14, PSMD2, PSMD4, PSMD5, PSMD7, PSMD8, PSMD9, RNF19A, SIAH1, SIAH2, SNCAIP, STUB1, TUBA1B, TUBA1C, TUBA3C, TUBA8, TUBB, TUBB2A, TUBB2B, TUBB3, TUBB4A, TUBB4B, TUBB6, UBE2G1, UBE2G2, UBE2J1, UBE2J2, UBE2L3, UBE2L6]
GO:0000127	IL-5 Signaling Pathway	WikiPathways_08.11.2016	0.025	1	2.8e-06	0.00056	[-1]	Group263	67.5	27	[AKT1, BTK, CSF2RB, ELK1, FOS, FOXO3, GRB2, GSK3A, JAK2, JUN, KRAS, LYN, MAP2K1, MAPK3, MAPT, MYC, PIK3R2, PTPN11, RPS6, RPS6KA1, RPS6KB1, RPS6KB2, SHC1, SPRED1, STAT1, STAT3, STAT5B]
GO:0003844	PI3K-AKT-mTOR signaling pathway and therapeutic opportunities	WikiPathways_08.11.2016	0.026	1	0.026	1	[-1]	Group019	70	21	[AKT1, ATG13, BAD, CDKN1B, EIF4EBP1, FOXO1, FOXO3, GRB10, KRAS, MTOR, NOS3, NRAS, PDK1, PIK3CA, PIK3R2, PTEN, RB1CC1, RHEB, RICTOR, RPTOR, TFEB]
GO:0000698	Glucuronidation	WikiPathways_08.11.2016	0.029	1	0.029	1	[-1]	Group086	26.9231	7	[HK1, PGM1, PGM2, PGM3, UGDH, UGP2, UGT1A6]
GO:0000395	IL-4 Signaling Pathway	WikiPathways_08.11.2016	0.029	1	2.8e-06	0.00056	[-1]	Group263	63.6364	35	[AKT1, BAD, CBL, CEBPB, ELK1, EP300, FLNA, FOS, GRB2, HRH1, IL2RG, IL4R, INPP5D, IRS1, IRS2, JAK2, JAK3, MAPK11, MAPK3, NFIL3, NFKBIA, PIK3CA, PIK3R2, PTPN11, PTPN6, RELA, RPS6KB1, SHC1, SOCS1, SOCS3, SOCS5, STAT1, STAT3, STAT5B, STAT6]
GO:0000623	Oxidative phosphorylation	WikiPathways_08.11.2016	0.029	1	0.00071	0.13	[-1]	Group241	62.9032	39	[ATP5A1, ATP5E, ATP5F1, ATP5G1, ATP5G2, ATP5G3, ATP5H, ATP5I, ATP5J, ATP5J2, ATP5L, ATP5O, ATP5S, ATP6AP1, ATP6AP2, GZMB, NDUFA10, NDUFA11, NDUFA3, NDUFA4L2, NDUFA5, NDUFA7, NDUFA8, NDUFA9, NDUFAB1, NDUFB2, NDUFB4, NDUFB5, NDUFB6, NDUFB8, NDUFC1, NDUFC2, NDUFS1, NDUFS5, NDUFS6, NDUFS7, NDUFV1, NDUFV2, NDUFV3]
GO:0002637	Structural Pathway of Interleukin 1 (IL-1)	WikiPathways_08.11.2016	0.033	1	0.54	1	[-1]	Group262	64	32	[EIF4E, ELK1, FOS, IL1R1, IL1RAP, IRAK4, IRF7, MAP2K1, MAP2K3, MAP2K4, MAP2K6, MAP2K7, MAP3K1, MAP3K3, MAP3K7, MAP3K8, MAPK10, MAPK11, MAPK3, MAPK8, MAPKAPK2, MBP, MKNK2, MYC, NFKBIA, NFKBIB, RELA, RPS6KA5, SAFB, TAB2, TANK, TOLLIP]
GO:0001589	Folate-Alcohol and Cancer Pathway	WikiPathways_08.11.2016	0.034	1	0.034	1	[-1]	Group081	87.5	7	[ALDH1A1, ALDH1L1, CBS, CEBPB, CREB1, CYP2E1, MTHFR]
GO:0000058	Monoamine GPCRs	WikiPathways_08.11.2016	0.036	1	0.036	1	[-1]	Group071	30.303	10	[ADRA1A, ADRA2B, ADRA2C, CHRM4, HRH1, HRH2, HTR1B, HTR1D, HTR2A, HTR6]
GO:0003680	Association Between Physico-Chemical Features and Toxicity Associated Pathways	WikiPathways_08.11.2016	0.037	1	0.037	1	[-1]	Group016	61.7647	42	[ACTR2, ACTR3, AKT1, AXIN1, CBL, CDKN1B, CTNNB1, DAAM1, DVL1, EGFR, ELK1, ERBB2, ERBB4, FN1, FZD1, FZD10, FZD5, FZD6, FZD7, FZD8, FZD9, GPX1, GRB2, GRIA1, JUN, MAP2K1, MAP2K4, MAPK8, MYC, MYLK, NCK1, NEFH, NOS1, PAK1, PFN2, PPP2CA, PTK2, RHOA, ROCK2, SHC1, SOD1, TMSB4X]
GO:0000422	MAPK Cascade	WikiPathways_08.11.2016	0.038	1	0.54	1	[-1]	Group262	68.9655	20	[ARAF, BRAF, ELK1, JUN, KRAS, MAP2K1, MAP2K3, MAP2K4, MAP2K6, MAP2K7, MAP3K1, MAP3K2, MAP3K3, MAPK10, MAPK12, MAPK3, MBP, NRAS, RASA3, RRAS]
GO:0000706	Sudden Infant Death Syndrome (SIDS) Susceptibility Pathways	WikiPathways_08.11.2016	0.039	1	0.039	1	[-1]	Group088	40.8537	67	[ACADM, ALDOA, AQP4, BHLHE40, C4B, CASP3, CC2D1A, CEBPB, CHRNA4, CPT1A, CREB1, CREBBP, CREM, CTNNB1, DLX2, EGR1, EP300, GAPDH, GJA1, HADHA, HADHB, HDAC1, HIF1A, HSP90B1, HSPD1, HTR2A, IL1RN, IL6, JUN, LMX1B, MBD1, MECP2, NR3C1, NTRK2, PBX1, PKNOX1, POU2F2, PPARGC1A, PRKACA, PRKACB, PRKAR1A, PRKAR1B, PRKAR2B, RORA, RUNX3, SCN3B, SCN4B, SCN5A, SNAP25, SP1, SP3, SPTBN1, SSTR2, TCF3, TH, TLX3, TNF, T…
GO:0000524	G13 Signaling Pathway	WikiPathways_08.11.2016	0.04	1	0.04	1	[-1]	Group062	65.8537	27	[ARHGDIB, ARHGDIG, CALM1, CALM2, CDC42, CFL2, CYFIP1, DIAPH1, GNA13, IQGAP1, IQGAP2, LIMK1, MAPK10, PIK3CA, PIK3R2, PIP4K2A, PKN1, PPP1CB, RAC1, RHOA, RHPN2, ROCK1, ROCK2, RPS6KB1, SH3RF1, WAS, WASL]
GO:0000023	B Cell Receptor Signaling Pathway	WikiPathways_08.11.2016	0.041	1	0.058	1	[-1]	Group257	59.1837	58	[AKT1, BCL6, BRAF, BTK, CAMK2A, CARD11, CBL, CD79A, CD81, CDC42, CREB1, CRKL, DAPP1, E2F3, ELK1, ETS1, FOXO1, GAB1, GRB2, GSK3A, GTF2I, HCLS1, ILF2, INPP5D, JUN, LAT2, LYN, MAP2K1, MAP2K6, MAP3K7, MAP4K1, MAPK4, MAPK8, MAX, MEF2D, MYC, NCK1, NFATC2, NFKBIA, PDPK1, PIK3R2, PIP5K1A, PRKCB, PRKCD, PTPN11, PTPN18, PTPN6, PTPRC, RAC1, RAC2, RAPGEF1, REL, RELA, RPS6KA1, SH3BP2, SHC1, VAV1, VAV2]
GO:0000289	Myometrial Relaxation and Contraction Pathways	WikiPathways_08.11.2016	0.043	1	0.12	1	[-1]	Group256	56.962	90	[ACKR3, ACTB, ACTG1, ADCY1, ADCY4, ADCY6, ADCY7, ADCY9, ADM, ATF1, ATF3, ATF4, ATP2A2, CALCA, CALD1, CALM1, CALM2, CALM3, CAMK2A, CAMK2G, CREB1, CRH, CRHR1, DGKZ, ETS2, FOS, GABPA, GABPB1, GJA1, GNAQ, GNAS, GNB1, GNB4, GNB5, GNG11, GNG12, GNG13, GNG7, GNG8, GRK4, GRK5, GRK6, GSTO1, GUCA2A, GUCY1A3, IGFBP2, IGFBP3, IGFBP4, IGFBP5, IL6, ITPR1, ITPR2, ITPR3, JUN, LPAR1, MAFF, NOS1, NOS3, OXT, PDE4B,…
GO:0000560	TGF-beta Receptor Signaling	WikiPathways_08.11.2016	0.047	1	0.047	1	[-1]	Group070	62.069	36	[BMP4, CREBBP, CTNNB1, ENG, EP300, FKBP1A, FOS, FOXH1, FST, INHBA, JUN, LEF1, LTBP1, MAPK3, RUNX2, RUNX3, SERPINE1, SMAD2, SMAD3, SMAD4, SMAD5, SMAD6, SMAD9, SPP1, STAT1, STAT3, TFE3, TGFB1, TGFBR1, TGFBR2, TGIF1, THBS1, TNF, WNT1, ZEB2, ZNF423]
GO:0002037	Prolactin Signaling Pathway	WikiPathways_08.11.2016	0.048	1	0.0021	0.37	[-1]	Group255	60.5263	46	[AKT1, CASP3, CBL, EIF4EBP1, ELK1, ERBB2, FLNA, FOS, GRB2, IRS1, IRS2, ITGB1, JAK2, JUN, MAP2K1, MAPK3, MAPK8, MTOR, MYC, NFKBIA, NFKBIB, NOS2, PAK1, PIK3CA, PIK3R2, PPIA, PPIB, PTK2, PTPN1, PTPN11, PTPN6, RAC1, RELA, RPS6, RPS6KA2, RPS6KB1, SHC1, SOCS1, SOCS3, STAT1, STAT3, STAT5B, VAV1, VAV2, YWHAG, YWHAZ]
GO:0002037	Prolactin Signaling Pathway	WikiPathways_08.11.2016	0.048	1	2.8e-06	0.00056	[-1]	Group263	60.5263	46	[AKT1, CASP3, CBL, EIF4EBP1, ELK1, ERBB2, FLNA, FOS, GRB2, IRS1, IRS2, ITGB1, JAK2, JUN, MAP2K1, MAPK3, MAPK8, MTOR, MYC, NFKBIA, NFKBIB, NOS2, PAK1, PIK3CA, PIK3R2, PPIA, PPIB, PTK2, PTPN1, PTPN11, PTPN6, RAC1, RELA, RPS6, RPS6KA2, RPS6KB1, SHC1, SOCS1, SOCS3, STAT1, STAT3, STAT5B, VAV1, VAV2, YWHAG, YWHAZ]
GO:0002289	Drug Induction of Bile Acid Pathway	WikiPathways_08.11.2016	0.049	1	0.049	1	[-1]	Group141	23.5294	4	[ABCC2, ABCC3, NR1I3, SLC51A]
GO:0001449	Regulation of toll-like receptor signaling pathway	WikiPathways_08.11.2016	0.052	1	0.54	1	[-1]	Group262	40.6897	59	[AKT1, AKT2, AKT3, BTK, CCL3, CCL4, CCL5, CD14, CD40, CYLD, FOS, IFNA4, IFNAR1, IL6, IRAK3, IRAK4, IRF5, IRF7, JUN, LBP, LY96, MAP2K1, MAP2K3, MAP2K4, MAP2K6, MAP2K7, MAP3K7, MAP3K8, MAPK10, MAPK11, MAPK12, MAPK3, MAPK8, MLST8, NFKBIA, PELI1, PELI2, PIK3CA, PIK3R2, PTPN6, RAC1, RBCK1, RELA, RIPK1, RNF216, SFTPA2, SFTPD, SMAD6, SOCS1, SPP1, SQSTM1, STAT1, TAB2, TICAM1, TLR5, TLR9, TNF, TOLLIP, TRE…
GO:0001602	Nicotine Activity on Dopaminergic Neurons	WikiPathways_08.11.2016	0.053	1	0.053	1	[-1]	Group102	27.2727	6	[CHRNA4, GNAI1, GNB1, KCNK3, PRKACA, TH]
GO:0001941	Peroxisomal beta-oxidation of tetracosanoyl-CoA	WikiPathways_08.11.2016	0.056	1	0.056	1	[-1]	Group109	100	4	[ACAA1, ACOX1, HSD17B4, SCP2]
GO:0000733	Serotonin Receptor 2 and STAT3 Signaling	WikiPathways_08.11.2016	0.056	1	0.056	1	[-1]	Group097	100	4	[GNAQ, HTR2A, JAK2, STAT3]
GO:0000244	Alpha 6 Beta 4 signaling pathway	WikiPathways_08.11.2016	0.06	1	0.06	1	[-1]	Group213	65.7143	23	[AKT1, EIF4EBP1, GAB1, GRB2, IRS1, IRS2, ITGA6, ITGB4, LAMA5, LAMB1, LAMB2, LAMB3, LAMC1, MAPK3, MTOR, PIK3R2, PRKCA, PRKCD, PTK2, PTPN11, RAC1, RHOA, SHC1]
GO:0000231	TNF alpha Signaling Pathway	WikiPathways_08.11.2016	0.061	1	0.061	1	[-1]	Group147	58.5106	55	[AKT1, BAD, BAX, BID, BIRC2, BTRC, CASP3, CASP7, CDC37, CFLAR, CREBBP, CSNK2A1, DIABLO, FBXW11, GLUL, GRB2, HSP90AA1, IL6, JUN, KRAS, MAP2K3, MAP2K4, MAP2K6, MAP2K7, MAP3K1, MAP3K3, MAP3K5, MAP3K7, MAP3K8, MAPK3, MAPK8, NFKBIA, NFKBIB, NOX1, NRAS, NSMAF, OTUD7B, PPP2CA, PRKCZ, PSMD2, RAC1, REL, RFFL, RIPK1, RIPK3, SELE, SKP1, TAB2, TANK, TNF, TNFRSF1B, TRADD, TRAF1, TRAF2, TXN]
GO:0003595	mir-124 predicted interactions with cell cycle and differentiation	WikiPathways_08.11.2016	0.063	1	0.063	1	[-1]	Group216	85.7143	6	[CTDSP1, PRKAA1, PTBP1, SIX4, STK11, STRADB]
GO:0003877	Simplified Depiction of MYD88 Distinct Input-Output Pathway	WikiPathways_08.11.2016	0.064	1	0.13	1	[-1]	Group234	26.3158	5	[JUN, TLR5, TLR9, UBE2N, UBE2V1]
GO:0002032	Human Thyroid Stimulating Hormone (TSH) signaling pathway	WikiPathways_08.11.2016	0.066	1	0.066	1	[-1]	Group124	60.2941	41	[AKT1, BRAF, CDKN1B, CREB1, EGR1, FOS, GNA12, GNA13, GNAI1, GNAI2, GNAI3, GNAO1, GNAQ, GNAS, GNB1, IGF1R, JAK2, JUN, MAP2K1, MAP2K3, MAP2K6, MAPK3, MTOR, MYC, MYL12B, PDE4D, PDPK1, PIK3CA, PIK3R2, RAP1A, RAP1B, RAP1GAP, RB1, RBL2, RPS6, RPS6KA1, RPS6KB1, SCRIB, STAT1, STAT3, TTF2]
GO:0000716	Vitamin A and Carotenoid Metabolism	WikiPathways_08.11.2016	0.068	1	0.068	1	[-1]	Group092	34.0909	15	[ALDH1A1, BCO1, BCO2, CRABP2, CYP26B1, CYP2E1, DGAT1, DHRS3, LPL, NPC1L1, RARA, RARB, RBP4, RLBP1, SCARB1]
GO:0000710	DNA Damage Response (only ATM dependent)	WikiPathways_08.11.2016	0.072	1	0.072	1	[-1]	Group089	57.3913	66	[ABL1, AKT1, AKT2, AKT3, ATM, AXIN1, BAD, BAK1, BAX, BCL2L11, BCL6, CAT, CCND1, CCND2, CCNG2, CDC42, CDKN1B, CDKN2A, CTNNB1, DVL1, ERBB2, FOXO3, GRB2, HMGB1, INSR, IRS1, JUN, KRAS, LDLR, LEF1, MAP3K1, MAP3K7, MAPK10, MAPK8, MDM2, MLKL, MYC, NRAS, PCK2, PDK1, PIK3C2A, PIK3C2G, PIK3C3, PIK3CA, PIK3R2, PIK3R4, PPP2R5C, PPP2R5E, PTEN, RAC1, RAC2, RBL2, RHOA, SCP2, SHC1, SMAD3, SMAD4, SOD2, SOS2, TCF7…
GO:0000516	Hypertrophy Model	WikiPathways_08.11.2016	0.072	1	0.072	1	[-1]	Group061	70	14	[ADAM10, ATF3, CYR61, DUSP14, EIF4E, EIF4EBP1, HBEGF, IFRD1, IL1R1, MYOG, NR4A3, VEGFA, WDR1, ZEB1]
GO:0000497	Urea cycle and metabolism of amino groups	WikiPathways_08.11.2016	0.072	1	0.072	1	[-1]	Group057	70	14	[ALDH18A1, ARG1, ARG2, ASS1, CPS1, GAMT, GLUD1, NAGS, OAT, ODC1, PYCR1, PYCRL, SMS, SRM]
GO:0000673	ErbB Signaling Pathway	WikiPathways_08.11.2016	0.075	1	0.075	1	[-1]	Group077	61.1111	33	[ABL1, AKT3, ARAF, AREG, BAD, BCL2L11, CAMK2A, CCND1, CDKN1B, EGFR, EIF4EBP1, ELK1, ERBB2, ERBB4, FOXO1, GAB1, GRB2, HBEGF, JUN, KRAS, MAP2K1, MAP2K7, MAPK8, MDM2, MTOR, MYC, NCK1, NRG3, PAK4, PDK1, PRKCA, PTK2, RPS6KB1]
GO:0000107	Translation Factors	WikiPathways_08.11.2016	0.075	1	0.075	1	[-1]	Group228	61.1111	33	[EEF1A1, EEF1B2, EEF1D, EEF1G, EEF2, EEF2K, EIF1, EIF1AX, EIF1AY, EIF2AK3, EIF2B3, EIF2S1, EIF2S2, EIF3A, EIF3B, EIF3C, EIF3E, EIF3F, EIF3G, EIF3H, EIF3I, EIF4A2, EIF4B, EIF4E, EIF4EBP1, EIF4EBP2, EIF4H, EIF5, EIF5B, ETF1, GSPT2, PABPC1, PAIP1]
GO:0002853	Endoderm Differentiation	WikiPathways_08.11.2016	0.077	1	0.086	1	[-1]	Group248	56.1644	82	[ACACA, AEBP2, AHDC1, APP, ATP8B2, BCORL1, BMPR1A, BPTF, BTAF1, CAND1, CDC73, CDYL, CEBPZ, CRTC1, CTBP2, CTNNB1, CTR9, CUL4B, DAB2, DNMT3B, DUSP4, DUSP5, ELAVL1, ELP4, EMSY, EPB41L5, EXT1, EZH2, FOXH1, FOXN3, FOXO1, GATA4, GRHL2, HNF1B, HOXC11, HPRT1, JARID2, KDM4A, LAMC1, LEF1, LEO1, LRPPRC, MAP2K3, MBTD1, NAA15, NKX2-1, NLK, NME1, NR3C1, PABPC1, PAF1, PARP8, PAX9, PBX1, PBX3, PIAS1, PLCH1, RAB3…
GO:0002572	Primary Focal Segmental Glomerulosclerosis FSGS	WikiPathways_08.11.2016	0.078	1	0.078	1	[-1]	Group085	59.4595	44	[AGRN, AKT1, CD151, CD2AP, CDH2, CDKN1B, CTNNB1, CTSL, DAG1, DNM1, FAT1, INF2, ITGAV, ITGB1, ITGB4, JAG1, KIRREL2, KIRREL3, KRT8, LAMA5, LAMB2, LIMS1, LMX1B, MKI67, MME, MYH9, MYO1E, NCK1, NPHS1, PARVA, PCNA, PTK2, SCARB2, SMARCAL1, SYNPO, TGFB1, TLN1, UTRN, VCL, VIM, VTN, WNT1, WT1, YWHAQ]
GO:0002873	Aryl Hydrocarbon Receptor Pathway	WikiPathways_08.11.2016	0.08	1	0.08	1	[-1]	Group176	35.4167	17	[AHR, BAX, CDC37, CDKN1B, CYP1B1, EGFR, EP300, HSP90AA1, JUN, JUNB, MYOF, POLK, PTGES3, SLC7A5, TGFB1, TNF, UGT1A6]
GO:0003657	Hematopoietic Stem Cell Gene Regulation by GABP alpha/beta Complex	WikiPathways_08.11.2016	0.086	1	0.086	1	[-1]	Group004	68.1818	15	[ATM, CREBBP, DNMT1, DNMT3A, DNMT3B, EP300, ETV6, FOXO3, GABPA, GABPB1, GZMB, MCL1, PTEN, SMAD4, SMARCA4]
GO:0003599	Transcription factor regulation in adipogenesis	WikiPathways_08.11.2016	0.086	1	0.086	1	[-1]	Group219	68.1818	15	[CEBPB, CEBPD, CREB1, FOXO1, IL6, INSR, IRS1, IRS2, LPIN1, MAPK8, NR3C1, NRIP1, PCK2, PPARGC1A, TNF]
GO:0002369	Histone Modifications	WikiPathways_08.11.2016	0.089	1	0.089	1	[-1]	Group157	59.4203	41	[AEBP2, DOT1L, EED, EHMT1, EHMT2, EZH1, EZH2, H3F3A, H3F3B, HIST1H3A, HIST1H3B, HIST1H3C, HIST1H3D, HIST1H3E, HIST1H3G, HIST1H3J, HIST1H4A, HIST1H4B, HIST1H4C, HIST1H4K, HIST2H3A, HIST2H3D, HIST4H4, KMT2A, KMT2B, KMT2C, KMT2D, KMT2E, KMT5C, NSD1, PRDM2, SET, SETBP1, SETD1A, SETD4, SETD6, SETD7, SETDB1, SETDB2, SMYD3, SUV39H1]
GO:0002636	Common Pathways Underlying Drug Addiction	WikiPathways_08.11.2016	0.09	1	0.13	1	[-1]	Group242	61.9048	26	[ACTB, ACTG1, ACTG2, ADCY1, ARAF, CALM1, CALM2, CAMK2A, CAMK4, CREB1, GNAI1, GNAS, GRIA1, GRIA3, GRIN2A, MAP2K1, MAPK3, PPP1CB, PPP1CC, PRKACA, PRKACB, PRKCA, PRKCB, PRKCG, RAP1A, RAP1B]
GO:0000299	Nuclear Receptors in Lipid Metabolism and Toxicity	WikiPathways_08.11.2016	0.091	1	0.012	1	[-1]	Group250	34.2857	12	[ABCB4, ABCC2, ABCC3, ABCG1, CYP2B6, CYP2E1, CYP4A11, CYP4B1, NR1I3, PPARD, RARA, RARB]
GO:0003646	Hepatitis C and Hepatocellular Carcinoma	WikiPathways_08.11.2016	0.092	1	0.092	1	[-1]	Group231	60.7843	31	[AKT1, C9orf3, CASP3, CASP7, CCND1, CD44, CTTN, CXCR1, FRZB, GRB2, HIF1A, IL6, JUN, LEF1, MAPK3, MAPK8, MMP1, MYC, MYOF, NOS2, PTGS2, PTPN11, RAC1, SMAD3, SMAD4, STAT3, TGFB1, TGFBR1, UCHL1, VAV2, VEGFA]
GO:0003585	Cytosine methylation	WikiPathways_08.11.2016	0.1	1	0.1	1	[-1]	Group212	77.7778	7	[DNMT1, IDH1, IDH2, MECP2, TDG, TET1, TET2]
GO:0000183	Proteasome Degradation	WikiPathways_08.11.2016	0.1	1	0.1	1	[-1]	Group108	59.375	38	[H2AFX, H2AFZ, HLA-A, HLA-B, HLA-C, HLA-E, HLA-F, PSMA2, PSMA3, PSMA4, PSMA6, PSMA7, PSMB1, PSMB2, PSMB4, PSMB7, PSMB9, PSMC1, PSMC3, PSMC4, PSMD1, PSMD10, PSMD12, PSMD2, PSMD4, PSMD5, PSMD7, PSMD8, PSMD9, PSME1, PSME2, RPN1, UBC, UBE2B, UBE2D2, UBE2D3, UCHL1, UCHL3]
GO:0000734	Serotonin Receptor 4/6/7 and NR3C Signaling	WikiPathways_08.11.2016	0.1	1	0.1	1	[-1]	Group098	68.4211	13	[ATF1, BRAF, CREB1, EGR1, ELK1, GNAS, HTR6, MAP2K1, MAPK3, MAPKAPK2, NR3C1, RAP1A, RPS6KA5]
GO:0000581	EPO Receptor Signaling	WikiPathways_08.11.2016	0.11	1	2.8e-06	0.00056	[-1]	Group263	65.3846	17	[AKT1, EPOR, GRB2, IRS1, IRS2, JAK2, MAP2K1, MAPK3, PDK1, PTPRC, PTPRU, RASA1, SHC1, SOCS1, STAT1, STAT3, STAT5B]
GO:0000206	Fatty Acid Omega Oxidation	WikiPathways_08.11.2016	0.11	1	0.11	1	[-1]	Group128	26.6667	4	[ADH1C, ALDH1A1, CYP2E1, CYP4A11]
GO:0001946	Cori Cycle	WikiPathways_08.11.2016	0.13	1	0.13	1	[-1]	Group110	68.75	11	[GAPDH, GPI, HK1, INS, LDHA, PFKP, PGAM1, PGK1, SLC2A1, TALDO1, TPI1]
GO:0003645	NAD+ biosynthetic pathways	WikiPathways_08.11.2016	0.13	1	0.12	1	[-1]	Group253	31.8182	7	[ACMSD, BST1, NADSYN1, NAMPT, SIRT3, SIRT5, TNKS]
GO:0002064	Neural Crest Differentiation	WikiPathways_08.11.2016	0.13	1	0.13	1	[-1]	Group129	41.1765	42	[AXIN1, BMP4, CDH1, CDH2, COL11A2, COL2A1, CTBP2, CTNNB1, DCT, DLL1, DVL1, ETS1, FGF2, FGFR1, GFAP, HDAC1, HDAC2, HDAC3, HDAC5, HDAC7, HEY2, HOXB1, ID1, ITGB1, MBP, MITF, MSX1, MYC, NOTCH2, NOTCH3, OLIG3, PAX7, PMP22, RBPJ, RHOB, SNAI2, SOX5, SOX9, TCF4, WNT1, WNT3A, ZIC1]
GO:0000098	Prostaglandin Synthesis and Regulation	WikiPathways_08.11.2016	0.14	1	0.14	1	[-1]	Group100	63.3333	19	[ANXA1, ANXA4, ANXA5, ANXA6, CYP11A1, EDN1, EDNRA, HPGD, HSD11B2, PLA2G4A, PTGER2, PTGER3, PTGER4, PTGFR, PTGIS, PTGS2, S100A10, S100A6, SCGB1A1]
GO:0003879	4-hydroxytamoxifen, Dexamethasone, and Retinoic Acids Regulation of p27 Expression	WikiPathways_08.11.2016	0.15	1	0.15	1	[-1]	Group035	66.6667	12	[AKT1, EIF4E, EIF4EBP1, MAP2K1, MAP2K3, MAP2K6, MAP3K5, MAPK3, MKNK2, MTOR, PRKAA1, TSC1]
GO:0003664	Regulation of Wnt/B-catenin Signaling by Small Molecule Compounds	WikiPathways_08.11.2016	0.15	1	0.15	1	[-1]	Group007	66.6667	12	[AXIN1, CSNK1A1, CTNNB1, DKK3, FZD1, FZD7, FZD8, LEF1, MBOAT1, TCF4, TNKS, WNT1]
GO:0000428	Wnt Signaling Pathway	WikiPathways_08.11.2016	0.15	1	0.5	1	[-1]	Group235	57.7465	41	[AXIN1, CCND1, CCND2, CSNK1E, CTNNB1, DVL1, FBXW2, FZD1, FZD10, FZD5, FZD6, FZD7, FZD8, FZD9, JUN, KREMEN1, LDLR, MAPK10, MYC, PAFAH1B1, PPP2R5C, PPP2R5E, PRKCA, PRKCB, PRKCD, PRKCE, PRKCG, PRKCI, PRKCQ, PRKCZ, PRKD1, RAC1, RHOA, ROR1, ROR2, RYK, WNT1, WNT10A, WNT2B, WNT3A, WNT6]
GO:0000179	Cell Cycle	WikiPathways_08.11.2016	0.16	1	0.82	1	[-1]	Group261	41.9048	44	[ABL1, ATM, ATR, BUB3, CCND2, CCNE2, CDC7, CDH1, CDK6, CDKN1B, CDKN2A, E2F3, EP300, ESPL1, GADD45A, HDAC1, HDAC2, HDAC3, HDAC5, HDAC7, KITLG, MCM2, MCM3, MCM4, MCM7, MDM2, MPEG1, ORC6, PCNA, PRKDC, PTTG1, PTTG2, RB1, SMAD3, SMAD4, TFDP1, TGFB1, WEE1, YWHAB, YWHAE, YWHAG, YWHAH, YWHAQ, YWHAZ]
GO:0003407	FTO Obesity Variant Mechanism	WikiPathways_08.11.2016	0.16	1	0.16	1	[-1]	Group205	75	6	[ARID5B, IRX3, IRX5, PPARGC1A, PRDM16, TBX1]
GO:0003668	Hypothesized Pathways in Pathogenesis of Cardiovascular Disease	WikiPathways_08.11.2016	0.16	1	0.16	1	[-1]	Group008	64	16	[ENG, FBN1, FLNA, LTBP1, LTBP2, MAPK3, MAPK8, POSTN, RUNX2, SERPINE1, SHC1, SMAD2, SMAD3, SMAD4, TGFBR1, TGFBR2]
GO:0000049	IL-2 Signaling Pathway	WikiPathways_08.11.2016	0.16	1	2.8e-06	0.00056	[-1]	Group263	59.5238	25	[AKT1, CBL, CCND2, CRKL, FOS, FOXO3, GRB2, IL2RG, JAK3, JUN, MAP2K1, MAPK3, MAPT, MYC, NMI, PTK2B, PTPN11, RPS6, RPS6KB1, RPS6KB2, SHC1, SOCS3, STAT1, STAT3, STAT5B]
GO:0003635	Insulin signalling in human adipocytes (diabetic condition)	WikiPathways_08.11.2016	0.16	1	0.16	1	[-1]	Group252	75	6	[AKT2, INSR, IRS1, MTOR, RPS6, RPS6KB1]
GO:0003634	Insulin signalling in human adipocytes (normal condition)	WikiPathways_08.11.2016	0.16	1	0.16	1	[-1]	Group252	75	6	[AKT2, INSR, IRS1, MTOR, RPS6, RPS6KB1]
GO:0000430	Statin Pathway	WikiPathways_08.11.2016	0.16	1	0.16	1	[-1]	Group236	36.3636	12	[ACSS1, APOA1, APOA5, APOC1, APOE, DGAT1, HMGCR, LDLR, LPL, SCARB1, SOAT1, SQLE]
GO:0000363	Wnt Signaling Pathway Netpath	WikiPathways_08.11.2016	0.16	1	0.16	1	[-1]	Group227	58.4906	31	[AKT1, AXIN1, CCND1, CDK6, CSNK1A1, CSNK1E, CSNK1G1, CTBP1, CTNNB1, DVL1, GJA1, GSK3A, LEF1, MAP3K7, MAPK8, MTOR, MYC, NFATC2, NLK, PRKCA, PRKCB, PRKCG, RAC1, RHOA, ROR1, ROR2, RYK, TCF3, TCF4, TCF7L2, TSC1]
GO:0002355	Corticotropin-releasing hormone signaling pathway	WikiPathways_08.11.2016	0.17	1	0.17	1	[-1]	Group152	55.914	52	[ACACA, AKT1, BRAF, CACNA1H, CAMK2A, CASP3, CREB1, CRH, CRHR1, CTNNB1, CYP11A1, CYP11B1, CYP21A2, ELK1, FOS, FOSB, GJA1, GNA11, GNAI1, GNAI2, GNAO1, GNAQ, GNAS, GNB1, GNB5, GRK3, GRK6, HSP90AA1, JUNB, JUP, MAP2K1, MAP3K5, MAPK3, MAPK8, NCOA2, NFKBIA, NOS3, NR4A2, PRKAA2, PRKCA, PRKCB, PRKCD, PRKCI, PRKCQ, PTK2, RAP1B, RELA, RHOA, SP1, TCF4, TGFB1, TRIM28]
GO:0000314	Fas Ligand (FasL) pathway and Stress induction of Heat Shock Proteins (HSP) regulation	WikiPathways_08.11.2016	0.17	1	0.17	1	[-1]	Group190	59.0909	26	[ACTB, ACTG1, ARHGDIB, CASP10, CASP3, CASP6, CASP7, CFLAR, CYCS, FAF1, FAS, HSPB1, JUN, LMNA, MAP2K4, MAP3K1, MAP3K7, MAPK8, MAPKAPK2, NFX1, PAK1, PAK2, PRKDC, RB1, RIPK2, TNF]
GO:0002035	Follicle Stimulating Hormone (FSH) signaling pathway	WikiPathways_08.11.2016	0.17	1	0.17	1	[-1]	Group125	62.963	17	[AKT1, APPL1, AREG, CREB1, EIF4EBP1, FOXO1, GRK6, HIST3H3, MAPK3, MTOR, PRKACA, PRKCA, RHEB, RPS6, RPS6KB1, RPS6KB2, SGK1]
GO:0002332	Interleukin-11 Signaling Pathway	WikiPathways_08.11.2016	0.17	1	2.8e-06	0.00056	[-1]	Group263	59.0909	26	[AKT1, ATF1, BGLAP, CREB1, GRB2, IBSP, ICAM1, IL11, IL6ST, JAK2, MAP2K1, MAPK3, PDPK1, PIAS1, PIK3R2, PTPN11, RELA, RPS6, RPS6KA1, RPS6KB1, RUNX2, SOCS3, STAT1, STAT3, TGFB1, YES1]
GO:0000195	IL-1 signaling pathway	WikiPathways_08.11.2016	0.18	1	0.54	1	[-1]	Group262	57.8947	33	[AKT1, HSPB2, IL1R1, IL1RAP, IRAK3, IRAK4, JUN, MAP2K1, MAP2K3, MAP2K4, MAP2K6, MAP2K7, MAP3K1, MAP3K2, MAP3K3, MAP3K7, MAPK3, MAPK8, MAPKAPK2, NFKBIA, NFKBIB, PELI1, PELI2, PIK3R2, PRKCZ, PTPN11, REL, RELA, SQSTM1, TAB2, TOLLIP, UBE2N, UBE2V1]
GO:0002583	T-Cell Receptor and Co-stimulatory Signaling	WikiPathways_08.11.2016	0.19	1	0.19	1	[-1]	Group095	62.069	18	[AKT1, CALM1, CALM2, CD28, CD8A, CD8B, CSNK1A1, DYRK1A, DYRK2, GSK3A, NFATC2, NFKBIA, PDK1, PPP3CA, PRKCA, PTEN, PTPN6, RASA1]
GO:0000545	Complement Activation	WikiPathways_08.11.2016	0.2	1	0.8	1	[-1]	Group239	63.6364	14	[C1QA, C1QB, C1QC, C1R, C2, C3, C4B, C5, C8B, CD55, CFB, CFD, CFP, MASP2]
GO:0003850	Factors and pathways affecting insulin-like growth factor (IGF1)-Akt signaling	WikiPathways_08.11.2016	0.2	1	0.2	1	[-1]	Group022	61.2903	19	[AKT1, EIF4E, FBXO32, IGF1, IGF1R, IGFBP5, IRS1, ITGB1, JKAMP, MAP1LC3A, MTOR, PDK1, PPARGC1A, PTEN, RPS6KB1, SMAD2, SMAD3, TNFSF9, WASL]
GO:0000357	Fatty Acid Biosynthesis	WikiPathways_08.11.2016	0.2	1	0.2	1	[-1]	Group210	63.6364	14	[ACAA2, ACACA, ACACB, ACSL3, ACSL4, ACSL5, DECR1, ECH1, ECHDC1, ECHDC2, ECHDC3, ECHS1, HADH, SCD]
GO:0001530	miRNA Regulation of DNA Damage Response	WikiPathways_08.11.2016	0.2	1	0.2	1	[-1]	Group258	41.9355	39	[ABL1, ATM, ATR, BAX, BID, CASP3, CCND1, CCND2, CCNE2, CCNG1, CDK6, CDKN1B, CREB1, CYCS, DDB2, FAS, GADD45A, GADD45B, GADD45G, H2AFX, MCM7, MDM2, MYC, NBN, PIDD1, PML, PRKDC, RAD1, RAD50, RAD51, RAD9A, RB1, RPA2, RRM2B, SESN1, SFN, TLK2, TNFRSF10B, TP53AIP1]
GO:0002406	Cardiac Progenitor Differentiation	WikiPathways_08.11.2016	0.21	1	0.21	1	[-1]	Group183	39.6226	21	[ANPEP, BMP4, CXCR4, FGF2, GATA4, IGF1, INHBA, INS, KIT, MESP1, NCAM1, NKX2-5, PAX6, PDGFRA, ROR2, SCN5A, TBX5, TGFB1, THY1, TNNI3, WNT3A]
GO:0002875	Constitutive Androstane Receptor Pathway	WikiPathways_08.11.2016	0.21	1	0.012	1	[-1]	Group250	37.5	12	[ABCC2, ABCC3, CYP2B6, CYP3A5, CYP4A11, FOXO1, HSP90AA1, NCOA2, NR1I3, PPARGC1A, SP1, UGT1A6]
GO:0000501	GPCRs, Class C Metabotropic glutamate, pheromone	WikiPathways_08.11.2016	0.21	1	0.21	1	[-1]	Group059	31.25	5	[GPRC5A, GPRC5B, GPRC5C, GRM3, GRM7]
GO:0003644	NAD+ metabolism	WikiPathways_08.11.2016	0.21	1	0.12	1	[-1]	Group253	31.25	5	[NAMPT, NRK, NT5E, SIRT3, SIRT5]
GO:0000034	Ovarian Infertility Genes	WikiPathways_08.11.2016	0.21	1	0.21	1	[-1]	Group204	37.5	12	[ATM, CCND2, CDKN1B, CEBPB, DAZL, EGR1, GJA4, MLH1, NRIP1, PTGER2, SMAD3, TBP]
GO:0001403	AMP-activated Protein Kinase (AMPK) Signaling	WikiPathways_08.11.2016	0.22	1	0.22	1	[-1]	Group094	56.5217	39	[ACACA, ACACB, ADIPOR1, ADRA1A, AKT1, AKT2, CAB39, CAMKK1, CAMKK2, CPT1A, CPT1C, CRTC2, EEF2, EEF2K, EIF4EBP1, ELAVL1, HMGCR, INSR, LEPR, MTOR, PFKFB3, PIK3C3, PIK3CA, PIK3R2, PRKAA1, PRKAA2, PRKAB2, PRKACB, PRKAG1, PRKAG2, PRKAG3, RPS6KB1, RPS6KB2, RPTOR, SLC2A4RG, SREBF1, STK11, STRADB, TSC1]
GO:0003678	Amplification and Expansion of Oncogenic Pathways as Metastatic Traits	WikiPathways_08.11.2016	0.22	1	0.22	1	[-1]	Group014	64.7059	11	[CXCR4, CYTIP, EPAS1, JAG1, LEF1, POSTN, TCF7L2, TNC, VCAM1, VEGFA, VHL]
GO:0001455	Serotonin Transporter Activity	WikiPathways_08.11.2016	0.22	1	0.22	1	[-1]	Group217	27.2727	3	[IL1R1, NOS1, STX1A]
GO:0002865	IL1 and megakaryocytes in obesity	WikiPathways_08.11.2016	0.23	1	0.23	1	[-1]	Group173	36	9	[FCER1A, HBEGF, ICAM1, IL1R1, NLRP3, PIK3CA, PLA2G7, SELENBP1, TIMP2]
GO:0000075	Toll-like Receptor Signaling Pathway	WikiPathways_08.11.2016	0.23	1	0.54	1	[-1]	Group262	42.7184	44	[AKT1, AKT2, AKT3, CCL3, CCL4, CCL5, CD14, CD40, FOS, IFNA4, IFNAR1, IL6, IRAK4, IRF5, IRF7, JUN, LBP, LY96, MAP2K1, MAP2K3, MAP2K4, MAP2K6, MAP2K7, MAP3K7, MAP3K8, MAPK10, MAPK11, MAPK12, MAPK3, MAPK8, NFKBIA, PIK3CA, PIK3R2, RAC1, RELA, RIPK1, SPP1, STAT1, TAB2, TICAM1, TLR5, TLR9, TNF, TOLLIP]
GO:0000465	Tryptophan metabolism	WikiPathways_08.11.2016	0.23	1	0.23	1	[-1]	Group051	39.1304	18	[AADAT, ACAT1, ACMSD, ALDH1A1, ALDH3A2, ALDH9A1, AOC1, AOX1, CAT, CYP1B1, CYP2A13, CYP2E1, ECHS1, HADH, INMT, MDM2, PRMT1, UBR5]
GO:0000015	Selenium Micronutrient Network	WikiPathways_08.11.2016	0.24	1	0.35	1	[-1]	Group259	55.0562	49	[ALB, ALOX15B, ALOX5, ALOX5AP, APOA1, CAT, CBS, CTH, DIO2, F7, GGT1, GGTLC1, GGTLC2, GPX1, GPX2, GPX3, GPX6, HBB, ICAM1, IL6, INS, INSR, KMO, LDLR, MTHFR, PLAT, PNPO, PRDX1, PRDX4, PTGS2, RELA, SAA1, SAA2, SCARB1, SELENOF, SELENOH, SELENOI, SELENOK, SELENON, SELENOP, SELENOT, SELENOW, SERPINA3, SERPINE1, SOD1, SOD2, SOD3, TNF, TXN]
GO:0003529	Zinc homeostasis	WikiPathways_08.11.2016	0.24	1	0.24	1	[-1]	Group209	59.4595	22	[MT1A, MT1B, MT1E, MT1F, MT1G, MT1H, MT1L, MT1M, MT1X, MT2A, SLC30A1, SLC30A5, SLC30A6, SLC30A7, SLC30A9, SLC39A1, SLC39A10, SLC39A13, SLC39A14, SLC39A6, SLC39A8, SLC39A9]
GO:0000384	Apoptosis Modulation by HSP70	WikiPathways_08.11.2016	0.25	1	0.53	1	[-1]	Group260	63.1579	12	[AIFM1, BID, CASP2, CASP3, CASP6, CASP7, CYCS, FAS, HSPA1A, MAP3K1, MAPK10, RIPK1]
GO:0000043	Oxidation by Cytochrome P450	WikiPathways_08.11.2016	0.25	1	0.0099	1	[-1]	Group243	41.2698	26	[CYB5R2, CYB5R3, CYB5R4, CYP11A1, CYP11B1, CYP1B1, CYP20A1, CYP26B1, CYP26C1, CYP27A1, CYP27C1, CYP2A13, CYP2B6, CYP2E1, CYP2G1P, CYP2R1, CYP2S1, CYP2U1, CYP2W1, CYP39A1, CYP3A5, CYP4A11, CYP4B1, CYP4F22, CYP4X1, CYP51A1]
GO:0000383	Striated Muscle Contraction	WikiPathways_08.11.2016	0.25	1	0.25	1	[-1]	Group018	39.4737	15	[ACTG1, ACTN2, DES, DMD, MYBPC3, MYL9, TCAP, TMOD1, TNNI1, TNNI3, TNNT1, TPM3, TPM4, TTN, VIM]
GO:0003651	Pathways Affected in Adenoid Cystic Carcinoma	WikiPathways_08.11.2016	0.26	1	0.26	1	[-1]	Group232	56.0606	37	[AKT1, ARID1A, ARID4B, ARID5B, ATM, ATRX, BCOR, BCORL1, CREBBP, CTBP1, DTX4, EP300, ERBB2, ERBIN, FBXW7, FOXO3, HIST1H2AL, IL17RD, INSRR, JMJD1C, KANSL1, KDM6A, KMT2C, MAGI2, MAML3, MAX, MORF4L1, MYBL1, MYC, MYCBP, NFIB, NSD1, PIK3CA, PRKDC, PTEN, SMARCE1, UHRF1]
GO:0002870	Extracellular vesicle-mediated signaling in recipient cells	WikiPathways_08.11.2016	0.27	1	0.27	1	[-1]	Group175	60	18	[AKT1, AXIN1, CTNNB1, EGFR, ERBB2, KRAS, MET, MFGE8, MTOR, NRAS, SMAD2, SMAD3, SMAD4, TGFB1, TGFB3, TGFBR1, TGFBR2, WNT3A]
GO:0002828	Bladder Cancer	WikiPathways_08.11.2016	0.28	1	0.28	1	[-1]	Group164	59.375	19	[BRAF, CCND1, CDH1, CDKN2A, DAPK2, DAPK3, EGFR, ERBB2, MAP2K1, MDM2, MMP1, MYC, PIK3R2, RASSF1, RB1, RPS6KA5, THBS1, TYMP, VEGFA]
GO:0000272	Blood Clotting Cascade	WikiPathways_08.11.2016	0.28	1	0.28	1	[-1]	Group161	36.3636	8	[F12, F5, F7, F8A1, KLKB1, PLAT, SERPINE1, VWF]
GO:0002911	miRNA targets in ECM and membrane receptors	WikiPathways_08.11.2016	0.28	1	0.28	1	[-1]	Group185	39.5349	17	[COL1A2, COL3A1, COL5A1, COL5A2, COL6A1, COL6A2, COL6A3, FN1, ITGA11, ITGB5, LAMA4, LAMB2, LAMC1, SDC2, THBS1, THBS2, TNXB]
GO:0002446	Retinoblastoma (RB) in Cancer	WikiPathways_08.11.2016	0.28	1	0.82	1	[-1]	Group261	54.5455	48	[ABL1, CCDC6, CCND1, CCNE2, CDC7, CDK6, CDKN1B, DCK, DHFR, DNMT1, E2F3, FAF1, FANCG, H2AFZ, HDAC1, HLTF, HMGB1, HMGB2, MCM3, MCM4, MCM7, MDM2, MSH6, MYC, PCNA, POLA1, POLE, POLE2, PRIM1, PRKDC, PRMT2, RB1, RBBP4, RBBP7, RPA1, RPA2, RPA3, RRM1, SAP30, SMC2, SMC3, STMN1, SUV39H1, TFDP1, TOP2A, TYMS, WEE1, ZNF655]
GO:0002036	TNF related weak inducer of apoptosis (TWEAK) Signaling Pathway	WikiPathways_08.11.2016	0.28	1	0.027	1	[-1]	Group245	57.1429	24	[AKT1, AKT2, BIRC2, CASP3, CASP7, CCL5, CTNNB1, HDAC1, IL6, JUN, MAP3K7, MAPK3, MAPK8, NFKBIA, NFKBIB, RAC1, RELA, RELB, RIPK1, TNF, TNFSF12, TRAF1, TRAF2, TRAF5]
GO:0002525	Trans-sulfuration and one carbon metabolism	WikiPathways_08.11.2016	0.28	1	0.36	1	[-1]	Group237	59.375	19	[AHCYL1, AHCYL2, AMT, CBS, CTH, DHFR, DHFR2, DNMT1, DNMT3A, DNMT3B, GCLM, MAT2A, MAT2B, MTHFD1, MTHFD1L, MTHFD2, MTHFR, PSPH, TYMS]
GO:0000712	Estrogen signaling pathway	WikiPathways_08.11.2016	0.29	1	0.29	1	[-1]	Group090	60.8696	14	[AKT1, BRAF, CREB1, ELK1, ESR1, FOS, GNAS, GNB1, GPER1, JUN, MAP2K1, PIK3CA, PRKACA, SP1]
GO:0000334	GPCRs, Class B Secretin-like	WikiPathways_08.11.2016	0.3	1	0.3	1	[-1]	Group203	37.5	9	[ADGRE1, ADGRE5, ADGRG2, ADGRL2, CALCR, CRHR1, GCGR, GIPR, GLP2R]
GO:0002895	Differentiation of white and brown adipocyte	WikiPathways_08.11.2016	0.31	1	0.31	1	[-1]	Group184	60	15	[BMP2, BMP4, CEBPB, CEBPG, HOXC8, HOXC9, HSPB7, PLAC8, PPARGC1A, PRDM16, SLC7A10, SMAD5, SMAD9, ZIC1, ZNF423]
GO:0000205	IL-7 Signaling Pathway	WikiPathways_08.11.2016	0.31	1	2.8e-06	0.00056	[-1]	Group263	60	15	[AKT1, BAD, CCND1, CDKN1B, IL2RG, IL7R, JAK3, MAP2K1, MAPK3, MYC, PIK3R2, PTK2B, STAT1, STAT3, STAT5B]
GO:0002012	miRs in Muscle Cell Differentiation	WikiPathways_08.11.2016	0.31	1	0.31	1	[-1]	Group122	58.3333	21	[EZH2, ID2, MEF2B, MEF2D, MYF5, PAX7, PRKACA, PRKACB, PRKAR1A, PRKAR1B, PRKAR2B, PRKCA, PRKCB, PRKCD, PRKCE, PRKCG, PRKCI, PRKCQ, PRKCZ, PRKD1, PRKD3]
GO:0002447	Amyotrophic lateral sclerosis (ALS)	WikiPathways_08.11.2016	0.32	1	0.32	1	[-1]	Group224	57.8947	22	[ALS2, BAD, BAX, BID, CASP3, CAT, CCS, DERL1, GPX1, GRIA1, MAP2K6, MAP3K5, NEFH, NOS1, PPP3CA, PPP3CB, PPP3CC, PRPH, RAB5A, RAC1, SOD1, TNF]
GO:0000536	Calcium Regulation in the Cardiac Cell	WikiPathways_08.11.2016	0.32	1	0.12	1	[-1]	Group256	52.9801	80	[ADCY1, ADCY4, ADCY6, ADCY7, ADCY9, ADRA1A, ANXA6, ATP1A4, ATP1B1, ATP1B2, ATP1B3, ATP2A2, CACNA1A, CACNA1C, CACNA1S, CALM1, CALM2, CALM3, CALR, CAMK2A, CAMK2G, CAMK4, CHRM4, FKBP1A, GJA1, GJA4, GJA8, GJB2, GJC1, GJD2, GNA11, GNAI1, GNAI2, GNAI3, GNAO1, GNAQ, GNAS, GNB1, GNB4, GNB5, GNG11, GNG12, GNG13, GNG7, GNG8, GRK4, GRK5, GRK6, ITPR1, ITPR2, ITPR3, KCNJ5, PKIG, PRKACA, PRKACB, PRKAR1A, PRKAR…
GO:0003594	Circadian rythm related genes	WikiPathways_08.11.2016	0.32	1	0.32	1	[-1]	Group215	52.1739	108	[ADA, ADCY1, AHR, ARNT2, ARNTL2, ATF4, BHLHE40, BHLHE41, BTBD9, BTRC, CLDN4, CPT1A, CREB1, CREM, CRH, CRTC1, CRX, CRY1, CRY2, CSNK1E, DYRK1A, EGR1, EP300, EZH2, F7, FAS, FBXL3, FBXW11, GFPT1, GHRH, GNA11, GNAQ, HDAC1, HDAC2, HDAC3, HEBP1, HNF1B, HNRNPD, HNRNPU, ID2, ID3, ID4, IL6, JUN, KLF10, KLF9, KMT2A, LGR4, MAGEL2, MAPK10, MAPK8, MC3R, METTL3, MTA1, NAMPT, NCOA2, NFIL3, NKX2-1, NLGN1, NONO, N…
GO:0000051	Regulation of Actin Cytoskeleton	WikiPathways_08.11.2016	0.32	1	0.32	1	[-1]	Group060	52.9801	80	[ACTB, ACTG1, ARHGEF6, ARHGEF7, ARPC5, BAIAP2, BCAR1, BDKRB1, BDKRB2, BRAF, BRK1, CD14, CDC42, CFL2, CHRM4, CSK, DIAPH1, DIAPH3, DOCK1, EGFR, ENAH, EZR, FGD1, FGF1, FGF2, FGF22, FGF7, FGFR1, FN1, GNA12, GNA13, GNG12, IQGAP1, KRAS, LIMK1, MAP2K1, MAPK3, MAPK4, MAPK6, MRAS, MSN, MYH10, MYLK, NCKAP1, NRAS, PAK1, PAK2, PAK4, PAK6, PDGFA, PDGFRA, PDGFRB, PIK3C2A, PIK3C2G, PIK3C3, PIK3CA, PIK3R2, PIK3R…
GO:0000325	Triacylglyceride Synthesis	WikiPathways_08.11.2016	0.32	1	0.32	1	[-1]	Group193	38.4615	10	[AGPAT2, AGPAT4, AGPAT5, AGPS, DGAT1, GNPAT, LPL, MOGAT1, PLPP3, PNPLA2]
GO:0000619	Type II interferon signaling (IFNG)	WikiPathways_08.11.2016	0.32	1	0.32	1	[-1]	Group075	40.5405	15	[HLA-B, ICAM1, IFI6, IFNGR1, IFNGR2, JAK2, NOS2, OAS1, PRKCD, PSMB9, PTPN11, SOCS1, SOCS3, STAT1, STAT2]
GO:0000176	Folate Metabolism	WikiPathways_08.11.2016	0.33	1	0.35	1	[-1]	Group259	55.0725	38	[ALB, APOA1, CAT, CBS, CSF1, CTH, DHFR, F7, FOLR1, FOLR2, FOLR3, GART, GPX1, GPX2, GPX3, GPX6, HBB, ICAM1, IL6, INS, INSR, LDLR, MTHFD1, MTHFD2, MTHFR, PLAT, RELA, SAA1, SAA2, SCARB1, SERPINA3, SERPINE1, SLC19A1, SLC46A1, SOD1, SOD2, SOD3, TNF]
GO:0000531	Mismatch repair	WikiPathways_08.11.2016	0.33	1	0.33	1	[-1]	Group067	66.6667	6	[LIG1, MLH1, MSH2, MSH6, PCNA, RPA1]
GO:0000288	NLR Proteins	WikiPathways_08.11.2016	0.33	1	0.33	1	[-1]	Group180	66.6667	6	[CD40, EPHB2, ERBIN, MAP3K7, MAPK8, RELA]
GO:0002874	Liver X Receptor Pathway	WikiPathways_08.11.2016	0.34	1	0.34	1	[-1]	Group177	30	3	[CYP2B6, SCD, SREBF1]
GO:0002884	NRF2 pathway	WikiPathways_08.11.2016	0.35	1	0.35	1	[-1]	Group182	44.8276	65	[ABCC2, ABCC3, ABCC5, AGER, BLVRB, CBR1, CBR3, CES1, CYP4A11, DNAJB1, EGR1, EPHA3, FTH1, GCLM, GGT1, GGTLC1, GGTLC2, GPX2, GPX3, GSTA4, GSTM3, GSTM5, GSTP1, GSTT2, HBEGF, HSP90AA1, HSP90AB1, HSPA1A, MAFF, MAFG, MGST3, PGD, PPARD, PRDX1, PTGR1, SLC2A1, SLC2A12, SLC2A14, SLC2A3, SLC2A5, SLC39A1, SLC39A10, SLC39A13, SLC39A14, SLC39A6, SLC39A8, SLC39A9, SLC5A10, SLC5A11, SLC5A12, SLC5A3, SLC5A6, SLC6…
GO:0002431	Spinal Cord Injury	WikiPathways_08.11.2016	0.35	1	0.35	1	[-1]	Group191	53.3333	64	[ACAN, AIF1, ANXA1, AQP1, AQP4, ARG1, C1QB, C5, CASP3, CCND1, CCNG1, CDC42, CDKN1B, CHST11, COL2A1, CSPG4, CXCL1, CXCL2, EGFR, EGR1, FCGR2A, FCGR2C, FKBP1A, FOS, FOXO3, GADD45A, GDNF, GFAP, GJA1, ICAM1, IL1R1, IL6, LGALS3, LILRB3, LTB, MAPK3, MBP, MIF, MYC, NOS1, NOS2, NTN1, PLA2G6, PLXNA2, PPP3CA, PRB1, PRKCA, PTGS2, PTPRA, RAC1, RB1, RHOA, RHOB, ROCK2, RTN4, SLIT1, SOX9, TGFB1, TNF, TNFSF13B, V…
GO:0003287	Overview of nanoparticle effects	WikiPathways_08.11.2016	0.36	1	0.36	1	[-1]	Group196	36.8421	7	[AKT3, BAX, FN1, IL6, PTGS2, PTK2, TNF]
GO:0002253	Pilocytic astrocytoma	WikiPathways_08.11.2016	0.36	1	0.36	1	[-1]	Group136	75	3	[GRB2, NF1, PTPN11]
GO:0000690	Polyol Pathway	WikiPathways_08.11.2016	0.36	1	0.36	1	[-1]	Group079	75	3	[AKR1B1, ALDOB, SORD]
GO:0003851	TLR4 Signaling and Tolerance	WikiPathways_08.11.2016	0.36	1	0.36	1	[-1]	Group023	40	12	[IL6, INPP5D, IRAK3, IRAK4, IRF7, MAP3K7, NFKBIA, RIPK1, TAB2, TICAM1, TNF, TRAM1]
GO:0003584	MECP2 and Associated Rett Syndrome	WikiPathways_08.11.2016	0.37	1	0.37	1	[-1]	Group211	54.8387	34	[AKT1, ARHGEF26, BCL6, CAMK2A, CDON, CEBPD, CNP, CREB1, CSRP1, EZH2, FGF2, FUT8, GAMT, GRIA1, GRID1, HDAC1, HNRNPF, HNRNPH1, MBP, MECP2, MPP1, MTOR, NF1, NREP, PRPF38A, RBFOX1, RPS6, SGK1, SMC3, SP1, SP3, TET1, TET2, YBX1]
GO:0000106	Alanine and aspartate metabolism	WikiPathways_08.11.2016	0.38	1	0.38	1	[-1]	Group001	33.3333	4	[ABAT, ASS1, DARS, GOT2]
GO:0002363	Gastric Cancer Network 2	WikiPathways_08.11.2016	0.38	1	0.38	1	[-1]	Group156	57.5758	19	[AHCTF1, ATAD2, CACYBP, CEBPZ, CHTF18, CHTF8, COL9A1, CTNNB1, DSCC1, EGFR, FAM91A1, MTDH, MYC, PLAC8, RNF144B, S100A6, SNURF, TOP2A, UBE2T]
GO:0003672	LncRNA-mediated mechanisms of therapeutic resistance	WikiPathways_08.11.2016	0.38	1	0.38	1	[-1]	Group010	33.3333	4	[HIF1A, MEG3, UCA1, WNT6]
GO:0003849	MAPK and NFkB Signalling Pathways Inhibited by Yersinia YopJ	WikiPathways_08.11.2016	0.38	1	0.38	1	[-1]	Group021	33.3333	4	[MAP2K6, MAP3K1, NFKBIA, RRAS]
GO:0000268	Notch Signaling Pathway	WikiPathways_08.11.2016	0.38	1	0.26	1	[-1]	Group240	55.3191	26	[APH1A, APH1B, CREBBP, CTBP1, CTBP2, DLL1, DTX3L, DTX4, DVL1, HDAC1, HDAC2, INPP5K, JAG1, KAT2B, KCNJ5, LFNG, MAML1, MAML3, NCOR2, NCSTN, NOTCH2, NOTCH3, NUMBL, PTCRA, RBPJ, RBPJL]
GO:0001559	TFs Regulate miRNAs related to cardiac hypertrophy	WikiPathways_08.11.2016	0.38	1	0.38	1	[-1]	Group066	33.3333	4	[AKT1, AKT2, STAT3, TGFB1]
GO:0002203	Thymic Stromal LymphoPoietin (TSLP) Signaling Pathway	WikiPathways_08.11.2016	0.38	1	2.8e-06	0.00056	[-1]	Group263	55.3191	26	[AKT1, BTK, CRLF2, EIF4EBP1, HCK, IL6, IL7R, JAK2, LYN, MAP2K1, MAPK3, MAPK8, MTOR, MYC, NFKBIA, PIK3CA, PTPN11, RELA, RELB, RPS6, STAT1, STAT3, STAT5B, STAT6, TNFSF4, YES1]
GO:0000286	IL-3 Signaling Pathway	WikiPathways_08.11.2016	0.39	1	2.8e-06	0.00056	[-1]	Group263	55.102	27	[AKT1, BAD, CBL, CRKL, CSF2RB, FOS, GRB2, HCK, INPP5D, JAK2, JUN, LYN, MAP2K1, MAPK3, MAPK8, PIK3R2, PRKACA, PTPN11, PTPN6, RAPGEF1, SHC1, STAT3, STAT5B, TGFB1, VAV1, YWHAB, YWHAQ]
GO:0003872	Regulation of Apoptosis by Parathyroid Hormone-related Protein	WikiPathways_08.11.2016	0.39	1	0.39	1	[-1]	Group029	59.0909	13	[AKT1, BAK1, BAX, BCL2A1, BCL2L12, BCL2L13, BCL2L15, BID, GSK3A, ITGA6, ITGB4, MCL1, MYC]
GO:0002267	Synaptic Vesicle Pathway	WikiPathways_08.11.2016	0.4	1	0.4	1	[-1]	Group138	42.3077	22	[AP2B1, AP2M1, AP2S1, CACNA1A, CLN8, CLTA, CPLX1, CPLX2, DNM1, DNM1L, NSF, SLC17A7, SLC18A1, SLC18A3, SNAP25, STX1A, STXBP1, SYN1, SYN3, SYT1, UNC13B, VAMP2]
GO:0002881	Estrogen Receptor Pathway	WikiPathways_08.11.2016	0.41	1	0.41	1	[-1]	Group181	61.5385	8	[ACOX1, CYP1B1, ESR1, JUN, NR0B2, PDK4, SP1, STAT3]
GO:0002795	Cardiac Hypertrophic Response	WikiPathways_08.11.2016	0.42	1	0.92	1	[-1]	Group254	54.386	31	[AKT1, AKT2, CALM1, CALM2, CDK7, CDK9, FGF2, HDAC5, HDAC7, IGF1, MAP2K1, MAP2K3, MAP2K4, MAP2K5, MAP2K6, MAP2K7, MAP3K1, MAP3K7, MAP4K1, MAPK3, MAPK8, MTOR, NFATC2, PDPK1, PPP3CA, PRKCA, PRKD1, RAC1, TGFB1, TGFBR1, TNF]
GO:0003527	Preimplantation Embryo	WikiPathways_08.11.2016	0.43	1	0.43	1	[-1]	Group208	43.3333	26	[AQP3, ARGFX, ATP1A1, CDH1, CELF3, DLX2, EGR1, ELAVL1, ESRRA, FOSB, FOXD1, IRX5, KHSRP, KLF4, MTA3, MXD1, MYBL1, NANOGNB, NKX2-1, PBX1, SIX3, SMARCA4, SOX11, TEAD4, ZFP36, ZFP36L2]
GO:0000026	Signal Transduction of S1P Receptor	WikiPathways_08.11.2016	0.43	1	0.43	1	[-1]	Group115	57.6923	15	[AKT1, AKT2, AKT3, ASAH1, GNAI1, GNAI2, GNAI3, MAPK12, MAPK3, MAPK4, MAPK6, RACGAP1, S1PR3, SPHK1, SPHK2]
GO:0000061	Notch Signaling Pathway	WikiPathways_08.11.2016	0.44	1	0.26	1	[-1]	Group240	53.9683	34	[AKT1, APH1A, APH1B, CCND1, DLL1, EP300, FBXW7, FHL1, HDAC1, HDAC2, HES6, HEY2, HIF1A, ITCH, JAG1, JAK2, MAML1, MAML3, MAPT, MYC, NCOR2, NCSTN, NOTCH2, NOTCH3, NUMBL, PIK3R2, PTCRA, RBPJ, SAP30, SKP1, SNW1, SPEN, STAT3, TLE1]
GO:0003865	RIG-I-like Receptor Signaling	WikiPathways_08.11.2016	0.44	1	0.44	1	[-1]	Group027	54.0984	33	[ATG12, ATG5, AZI2, CASP10, CYLD, DDX17, DDX3X, DDX3Y, DDX58, IRF7, MAP3K1, MAP3K7, MAPK10, MAPK11, MAPK12, MAPK8, MAVS, NFKBIA, NFKBIB, NLRX1, PIN1, RELA, RIPK1, SIKE1, SNW1, TANK, TBKBP1, TKFC, TMEM173, TNF, TRADD, TRAF2, TRIM25]
GO:0000047	Hedgehog Signaling Pathway	WikiPathways_08.11.2016	0.45	1	0.45	1	[-1]	Group052	37.5	6	[GLI1, GLI3, GRK2, SAP18, SHH, SUFU]
GO:0000707	DNA Damage Response	WikiPathways_08.11.2016	0.46	1	0.2	1	[-1]	Group258	53.6232	37	[ABL1, ATM, ATR, BAX, BID, CASP3, CCND1, CCND2, CCNE2, CDK6, CDKN1B, CREB1, CYCS, DDB2, FAS, GADD45A, GADD45B, GADD45G, H2AFX, MDM2, MYC, NBN, PIDD1, PML, PRKDC, RAD1, RAD50, RAD51, RAD9A, RB1, RPA2, RRM2B, SESN1, SFN, TLK2, TNFRSF10B, TP53AIP1]
GO:0000241	One Carbon Metabolism	WikiPathways_08.11.2016	0.46	1	0.36	1	[-1]	Group237	56.6667	17	[AHCYL2, ALDH1L1, AMT, DHFR, DNMT1, DNMT3A, DNMT3B, FTCD, GART, GLRX, MAT2B, MTHFD1, MTHFD1L, MTHFD2, MTHFR, TCN2, TYMS]
GO:0000028	Selenium Metabolism and Selenoproteins	WikiPathways_08.11.2016	0.46	1	0.46	1	[-1]	Group162	54.3478	25	[CREM, CTH, DIO2, FOS, GPX1, GPX2, GPX3, GPX6, JUN, POU2F1, PSTK, RELA, RPL30, SCLY, SECISBP2, SELENBP1, SELENOH, SELENOI, SELENOK, SELENON, SELENOP, SELENOT, SELENOW, SP1, SP3]
GO:0000069	T-Cell antigen Receptor (TCR) Signaling Pathway	WikiPathways_08.11.2016	0.46	1	0.058	1	[-1]	Group257	52.7473	48	[AKT1, CARD11, CBL, CCR5, CD28, CD3D, CD3E, CD3G, CD4, CD8A, CDC42, CREB1, CRKL, DBNL, FAS, FOS, GRB2, IL15RA, IL6, ITPR1, JUN, LAT, LHB, MAP2K1, MAP3K7, MAP3K8, MAP4K1, MAPK3, MAPK8, NCK1, NFATC1, NFATC2, NFKBIA, PAK1, PDPK1, PIK3R2, PRKCD, PRKCQ, PTK2B, PTPN11, REL, RELA, RIPK2, SHC1, TGFB1, VAV1, VIM, WAS]
GO:0000408	Oxidative Stress	WikiPathways_08.11.2016	0.47	1	0.47	1	[-1]	Group044	41.9355	13	[CAT, FOS, GPX1, GPX3, GSTT2, JUNB, MAPK10, MT1X, SOD1, SOD2, SOD3, SP1, UGT1A6]
GO:0001544	MicroRNAs in cardiomyocyte hypertrophy	WikiPathways_08.11.2016	0.48	1	0.92	1	[-1]	Group254	45.098	46	[AGT, AKT1, AKT2, CALM1, CALM2, CDK7, CDK9, CTNNB1, DVL1, EDN1, FGF2, FZD1, GATA4, HDAC5, HDAC7, IGF1, IGF1R, IL6ST, MAP2K1, MAP2K3, MAP2K4, MAP2K5, MAP2K6, MAP2K7, MAPK3, MAPK4, MAPK8, MTOR, MYLK, NFATC4, NPPB, PDPK1, PIK3CA, PIK3R2, PPP3CA, PPP3CB, PRKCB, RAC1, RCAN1, RHOA, ROCK1, ROCK2, STAT3, TGFB1, TNF, WNT3A]
GO:0000143	Fatty Acid Beta Oxidation	WikiPathways_08.11.2016	0.49	1	0.74	1	[-1]	Group233	55.8824	19	[ACADM, ACADVL, ACAT1, ACSL3, ACSL4, ACSL5, CHKB, CPT1A, CRAT, DECR1, ECHS1, GPD2, HADH, HADHA, HADHB, LPL, PNPLA2, SLC25A20, TPI1]
GO:0001601	Fluoropyrimidine Activity	WikiPathways_08.11.2016	0.49	1	0.49	1	[-1]	Group101	55.8824	19	[ABCC3, ABCC5, CES1, DHFR, DPYD, ERCC2, GGH, MTHFR, RRM1, SLC22A7, SLC29A1, SMUG1, TDG, TK1, TYMP, TYMS, UCK2, UMPS, XRCC3]
GO:0000022	IL-9 Signaling Pathway	WikiPathways_08.11.2016	0.49	1	2.8e-06	0.00056	[-1]	Group263	57.8947	11	[CDK9, GRB2, IL2RG, IL9R, JAK3, MAP2K1, MAPK3, PIK3R2, STAT1, STAT3, STAT5B]
GO:0000247	Small Ligand GPCRs	WikiPathways_08.11.2016	0.49	1	0.49	1	[-1]	Group013	57.8947	11	[CNR1, CNR2, GPR50, LPAR1, PTAFR, PTGER2, PTGER3, PTGER4, PTGFR, S1PR3, TBXA2R]
GO:0000254	Apoptosis	WikiPathways_08.11.2016	0.51	1	0.53	1	[-1]	Group260	52.3256	45	[AKT1, BAD, BAK1, BAX, BCL2L11, BID, BIRC2, BNIP3L, CASP10, CASP2, CASP3, CASP6, CASP7, CDKN2A, CFLAR, CRADD, CYCS, DIABLO, FAS, GZMB, HELLS, IGF1, IGF1R, IRF5, IRF7, JUN, MAP2K4, MAP3K1, MAPK10, MCL1, MDM2, MYC, NFKBIA, NFKBIB, RELA, RIPK1, SCAF11, TNF, TNFRSF10B, TNFRSF1B, TNFSF10, TRADD, TRAF1, TRAF2, XIAP]
GO:0002533	Glycerophospholipid Biosynthetic Pathway	WikiPathways_08.11.2016	0.51	1	0.51	1	[-1]	Group068	57.1429	12	[AGPS, CDS2, CEPT1, CHKB, CHPT1, CRLS1, GNPAT, LPIN1, PCYT2, PGS1, PIP5K1A, PTDSS1]
GO:0003298	Melatonin metabolism and effects	WikiPathways_08.11.2016	0.51	1	0.51	1	[-1]	Group198	43.2432	16	[ACHE, APOE, CALM1, CALM2, CAMK2A, CRY1, CRY2, CSNK1E, CYP1B1, EDN1, FOXO1, MIR3142HG, PER1, PER2, PER3, PRKCA]
GO:0002507	Nanomaterial induced apoptosis	WikiPathways_08.11.2016	0.51	1	0.53	1	[-1]	Group260	57.1429	12	[AIFM1, BAK1, BAX, BID, CASP3, CASP6, CASP7, CFLAR, CYCS, DIABLO, FAS, MCL1]
GO:0003670	Simplified Interaction Map Between LOXL4 and Oxidative Stress Pathway	WikiPathways_08.11.2016	0.51	1	0.51	1	[-1]	Group009	57.1429	12	[ANXA5, BMP2, CDC37, COL2A1, DDR1, FGF7, FN1, IGFBP7, LOXL4, PKD1, SUV39H1, TGFB1]
GO:0000170	Nuclear Receptors	WikiPathways_08.11.2016	0.52	1	0.52	1	[-1]	Group104	43.5897	17	[ESR1, ESRRA, NR1D2, NR1H2, NR1I3, NR2E1, NR2F2, NR2F6, NR3C1, NR4A2, NR5A2, PPARD, RARA, RARB, ROR1, RORA, THRA]
GO:0000466	DNA Replication	WikiPathways_08.11.2016	0.53	1	0.82	1	[-1]	Group261	42.8571	18	[CDC7, MCM2, MCM3, MCM4, MCM7, ORC6, PCNA, POLA1, POLD4, POLE, POLE2, PRIM1, PRIM2, RFC2, RPA1, RPA2, RPA3, UBC]
GO:0000704	Methylation Pathways	WikiPathways_08.11.2016	0.53	1	0.53	1	[-1]	Group087	60	6	[COMT, INMT, MAT2A, MAT2B, NNMT, TPMT]
GO:0002333	Trans-sulfuration pathway	WikiPathways_08.11.2016	0.53	1	0.53	1	[-1]	Group150	60	6	[CBS, CTH, DNMT1, GCLM, MAT2B, MPST]
GO:0002113	Type III interferon signaling	WikiPathways_08.11.2016	0.53	1	0.53	1	[-1]	Group131	60	6	[IFNL1, IFNL2, IFNLR1, IL10RB, STAT1, STAT2]
GO:0002854	Gene regulatory network modelling somitogenesis	WikiPathways_08.11.2016	0.54	1	0.54	1	[-1]	Group167	36.3636	4	[DLL1, LFNG, RIPPLY2, WNT3A]
GO:0000080	Nucleotide GPCRs	WikiPathways_08.11.2016	0.54	1	0.54	1	[-1]	Group099	36.3636	4	[ADORA2B, P2RY2, P2RY4, P2RY6]
GO:0003878	ATM Signaling Network in Development and Disease	WikiPathways_08.11.2016	0.55	1	0.55	1	[-1]	Group034	43.4783	20	[ATM, ATMIN, ATR, AURKB, CEP63, DCLRE1C, H2AFX, HMGN1, HSPB1, MAP3K5, MTOR, NBN, PPM1D, PRKAA1, PRKDC, RAD50, RIF1, STK11, TP53BP1, TRIM28]
GO:0002007	Iron metabolism in placenta	WikiPathways_08.11.2016	0.57	1	0.57	1	[-1]	Group120	58.3333	7	[ACO1, FTH1, HEPHL1, IREB2, SLC40A1, STEAP3, TFR2]
GO:0002643	Nanoparticle-mediated activation of receptor signaling	WikiPathways_08.11.2016	0.57	1	0.57	1	[-1]	Group146	55.1724	16	[AKT3, AREG, COL1A1, EGFR, FN1, GRB2, ITGB1, KRAS, MAP2K1, MAPK10, MAPK11, MAPK12, MAPK8, NRAS, PTK2, TLN1]
GO:0002290	RalA downstream regulated genes	WikiPathways_08.11.2016	0.57	1	0.57	1	[-1]	Group144	58.3333	7	[CDC42, KRAS, NRAS, RAC1, RAC2, RALBP1, YBX3]
GO:0003679	Cell-type Dependent Selectivity of CCK2R Signaling	WikiPathways_08.11.2016	0.58	1	0.58	1	[-1]	Group015	38.4615	5	[CNR1, GNAI1, GNAQ, ITPR1, TRPC1]
GO:0002855	Dopaminergic Neurogenesis	WikiPathways_08.11.2016	0.58	1	0.58	1	[-1]	Group168	43.3333	13	[ALDH1A1, EN2, GLI1, LMX1A, LMX1B, MSX1, NR4A2, SHH, SLC6A3, STAT3, TGFB1, TH, WNT1]
GO:0002112	IL17 signaling pathway	WikiPathways_08.11.2016	0.58	1	0.58	1	[-1]	Group130	54.8387	17	[AKT1, CEBPB, CEBPD, IL17C, IL17F, IL17RA, IL17RB, IL17RC, IL17RD, JAK2, MAP3K7, MAPK3, NFKBIB, RELA, SP1, STAT3, TRAF3IP2]
GO:0000129	Matrix Metalloproteinases	WikiPathways_08.11.2016	0.58	1	0.58	1	[-1]	Group133	43.3333	13	[BSG, MMP1, MMP13, MMP15, MMP17, MMP19, MMP2, MMP25, MMP28, TIMP2, TIMP3, TIMP4, TNF]
GO:0001434	Osteopontin Signaling	WikiPathways_08.11.2016	0.58	1	0.58	1	[-1]	Group195	38.4615	5	[ITGAV, MAP2K1, MAPK3, RELA, SPP1]
GO:0001533	Vitamin B12 Metabolism	WikiPathways_08.11.2016	0.58	1	0.35	1	[-1]	Group259	52.8302	28	[ALB, APOA1, APOE, CBS, CCL5, CTH, F7, HBB, ICAM1, IL6, INS, INSR, LDLR, MCEE, MTHFR, MUT, PLAT, RELA, SAA1, SAA2, SCARB1, SERPINA3, SERPINE1, SOD1, SOD2, SOD3, TCN2, TNF]
GO:0003853	ERK Pathway in Huntington's Disease	WikiPathways_08.11.2016	0.59	1	0.59	1	[-1]	Group024	57.1429	8	[CASP3, CASP7, CREB1, EGFR, ELK1, MAP2K7, NTRK2, RPS6KA5]
GO:0000322	Osteoblast Signaling	WikiPathways_08.11.2016	0.59	1	0.59	1	[-1]	Group192	57.1429	8	[BGLAP, COL1A1, IBSP, ITGAV, PDGFRA, PDGFRB, TNFRSF11B, TNFSF11]
GO:0000003	Transcriptional activation by NRF2	WikiPathways_08.11.2016	0.6	1	0.6	1	[-1]	Group188	40	6	[CEBPB, EPHB2, GCLM, MAPK8, PIK3CA, PRKCA]
GO:0002291	Deregulation of Rab and Rab Effector Genes in Bladder Cancer	WikiPathways_08.11.2016	0.62	1	0.62	1	[-1]	Group145	56.25	9	[GCC2, MLPH, RAB27B, RPH3A, RPH3AL, SYTL1, SYTL2, SYTL5, UNC13D]
GO:0003414	Initiation of transcription and translation elongation at the HIV-1 LTR	WikiPathways_08.11.2016	0.62	1	0.62	1	[-1]	Group207	54.0541	20	[CCNT1, CDK9, CREBBP, EP300, HDAC1, HDAC2, HDAC3, HDAC5, HDAC7, NELFA, NFATC1, NFATC2, NFATC4, NFKBIA, PPP3CA, PPP3CB, PPP3CC, RELA, SP1, SUPT5H]
GO:0002435	Quercetin and Nf-kB/ AP-1 Induced Cell Apoptosis	WikiPathways_08.11.2016	0.62	1	0.62	1	[-1]	Group202	56.25	9	[FOS, JUN, MAFG, MAFK, MMP1, NFKBIA, NOS1, PTGS2, VEGFA]
GO:0002516	ATM Signaling Pathway	WikiPathways_08.11.2016	0.63	1	0.2	1	[-1]	Group258	45	18	[ABL1, ATM, BID, CASP2, CRADD, CREB1, GADD45A, H2AFX, JUN, MDM2, NBN, NFKBIA, PIDD1, RAD50, RAD51, RAD9A, RIPK1, TP53BP1]
GO:0003413	NOTCH1 regulation of human endothelial cell calcification	WikiPathways_08.11.2016	0.64	1	0.64	1	[-1]	Group206	55.5556	10	[ALPL, CALU, DLL1, JAG1, LPAR1, MGP, PLAT, SAT1, SOX6, VEGFA]
GO:0001992	TarBasePathway	WikiPathways_08.11.2016	0.64	1	0.64	1	[-1]	Group118	42.1053	8	[ERG, GJA1, HAND2, HCN2, IGF1, KCNE1, PTBP2, TMSB4X]
GO:0001591	Heart Development	WikiPathways_08.11.2016	0.65	1	0.65	1	[-1]	Group091	52.1739	24	[BHLHE40, BMP2, BMP4, BMPR1A, BMPR2, CTNNB1, FOXC1, FOXH1, GATA4, HAND2, HEY2, NFATC1, NFATC2, NFATC4, NKX2-5, PITX2, PTPN11, SHH, SMAD4, TBX1, TBX5, VEGFA, VEGFB, VEGFC]
GO:0001422	Sphingolipid Metabolism	WikiPathways_08.11.2016	0.65	1	0.65	1	[-1]	Group002	55	11	[ASAH1, ASAH2, B4GALT6, CERS2, CERS5, CERS6, KDSR, SERINC1, SPHK1, SPHK2, SPTLC1]
GO:0001424	Globo Sphingolipid Metabolism	WikiPathways_08.11.2016	0.67	1	0.85	1	[-1]	Group246	54.5455	12	[A4GALT, ABO, GALNT2, ST3GAL1, ST3GAL2, ST6GAL1, ST6GAL2, ST6GALNAC1, ST6GALNAC2, ST6GALNAC4, ST6GALNAC6, ST8SIA1]
GO:0000100	Glutathione metabolism	WikiPathways_08.11.2016	0.67	1	0.67	1	[-1]	Group000	43.4783	10	[ANPEP, GCLM, GGT1, GGTLC1, GGTLC2, GPX1, GPX2, GPX3, GSTT2, IDH1]
GO:0000688	Catalytic cycle of mammalian Flavin-containing MonoOxygenases (FMOs)	WikiPathways_08.11.2016	0.68	1	0.68	1	[-1]	Group078	60	3	[FMO1, FMO2, FMO5]
GO:0000167	Eicosanoid Synthesis	WikiPathways_08.11.2016	0.68	1	0.68	1	[-1]	Group103	54.1667	13	[ALOX15, ALOX15B, ALOX5, ALOX5AP, GGT1, GGTLC1, GGTLC2, LTC4S, PLA2G6, PNPLA3, PTGES, PTGIS, PTGS2]
GO:0003596	miR-517 relationship with ARCN1 and USP1	WikiPathways_08.11.2016	0.68	1	0.68	1	[-1]	Group218	60	3	[ID1, ID2, USP1]
GO:0002509	Nanoparticle triggered autophagic cell death	WikiPathways_08.11.2016	0.68	1	0.68	1	[-1]	Group033	54.1667	13	[AMBRA1, ATG12, ATG14, ATG5, CHAF1A, INS, INSR, MAP1LC3A, SH3GLB1, TSC1, ULK2, UVRAG, VMP1]
GO:0002542	Sulindac Metabolic Pathway	WikiPathways_08.11.2016	0.68	1	0.68	1	[-1]	Group076	60	3	[CYP1B1, MSRA, MSRB3]
GO:0000311	Synthesis and Degradation of Ketone Bodies	WikiPathways_08.11.2016	0.68	1	0.68	1	[-1]	Group189	60	3	[ACAT1, HMGCL, OXCT1]
GO:0002868	TCA Cycle Nutrient Utilization and Invasiveness of Ovarian Cancer	WikiPathways_08.11.2016	0.68	1	0.68	1	[-1]	Group174	60	3	[EGFR, MAPK3, STAT3]
GO:0003658	Wnt/beta-catenin Signaling Pathway in Leukemia	WikiPathways_08.11.2016	0.68	1	0.68	1	[-1]	Group005	54.1667	13	[AKT1, CCND1, CSNK1A1, CTNNB1, FZD6, JUP, LEF1, PML, PPARD, PYGO1, RARA, TCF3, WNT1]
GO:0000558	Complement and Coagulation Cascades	WikiPathways_08.11.2016	0.69	1	0.8	1	[-1]	Group239	45.7627	27	[BDKRB1, C1QA, C1QB, C1QC, C1R, C2, C3, C3AR1, C4B, CD46, CD55, CFB, CFD, CFH, CFI, F12, F5, F7, KLKB1, LMAN1, MASP2, PLAT, SERPINE1, SERPING1, TFPI, THBD, VWF]
GO:0000530	Cytokines and Inflammatory Response	WikiPathways_08.11.2016	0.7	1	0.7	1	[-1]	Group065	44.4444	12	[CD4, CSF1, CSF2, CXCL1, CXCL2, HLA-DRA, HLA-DRB1, IL11, IL6, PDGFA, TGFB1, TNF]
GO:0003863	TCR pathway during Staphylococcus aureus infection	WikiPathways_08.11.2016	0.7	1	0.058	1	[-1]	Group257	51.6129	32	[AKT1, CALM1, CALM2, CARD11, CBL, CD28, CD3D, CD4, CD8A, CHP1, CSF2, DLG1, FOS, GRB2, JUN, LAT, MAP2K1, MAP2K7, MAP3K7, MAP3K8, MAPK3, NCK1, NFATC2, NFKBIA, PAK1, PDK1, PIK3CA, PRKCQ, PTPN6, PTPRC, RRAS, TNF]
GO:0002276	Glial Cell Differentiation	WikiPathways_08.11.2016	0.72	1	0.72	1	[-1]	Group140	37.5	3	[CNP, MBP, MSN]
GO:0000237	Glucocorticoid & Mineralcorticoid Metabolism	WikiPathways_08.11.2016	0.72	1	0.72	1	[-1]	Group158	37.5	3	[CYP11A1, CYP21A2, HSD11B2]
GO:0000438	Non-homologous end joining	WikiPathways_08.11.2016	0.72	1	0.72	1	[-1]	Group048	57.1429	4	[PRKDC, RAD50, XRCC4, XRCC6]
GO:0000134	Pentose Phosphate Pathway	WikiPathways_08.11.2016	0.72	1	0.72	1	[-1]	Group142	57.1429	4	[PGD, PGLS, RPE, TALDO1]
GO:0003676	BDNF-TrkB Signaling	WikiPathways_08.11.2016	0.73	1	0.73	1	[-1]	Group012	52.9412	18	[ADCY1, AKT1, BRAF, CREB1, EEF2K, EIF4EBP1, GAB1, GRB2, KRAS, MAP2K1, MTOR, NRAS, NTRK2, RHEB, RPS6KA1, RPS6KB1, SHC1, TSC1]
GO:0000696	Benzo(a)pyrene metabolism	WikiPathways_08.11.2016	0.74	1	0.74	1	[-1]	Group083	55.5556	5	[AKR1A1, AKR1C1, AKR1C3, AKR1C4, CYP1B1]
GO:0002942	DDX1 as a regulatory component of the Drosha microprocessor	WikiPathways_08.11.2016	0.74	1	0.81	1	[-1]	Group249	55.5556	5	[ATM, DDX1, DROSHA, NBN, RAD50]
GO:0003300	Dual hijack model of Vif in HIV infection	WikiPathways_08.11.2016	0.74	1	0.74	1	[-1]	Group199	55.5556	5	[CBFB, CUL5, ELOC, RBX1, RUNX1]
GO:0003593	miR-148a/miR-31/FIH1/HIF1Î±-Notch signaling in glioblastoma	WikiPathways_08.11.2016	0.74	1	0.74	1	[-1]	Group214	55.5556	5	[HIF1A, HIF1AN, VEGFA, VEGFB, VEGFC]
GO:0003674	Tgif disruption of Shh signaling	WikiPathways_08.11.2016	0.74	1	0.74	1	[-1]	Group011	55.5556	5	[GLI3, NKX2-1, SHH, SMAD2, TGIF1]
GO:0003601	Composition of Lipid Particles	WikiPathways_08.11.2016	0.75	1	0.16	1	[-1]	Group236	40	4	[APOA1, APOE, LDLR, LPL]
GO:0003656	Interleukin-1 Induced Activation of NF-kappa-B	WikiPathways_08.11.2016	0.75	1	0.13	1	[-1]	Group234	40	4	[PRKCZ, SQSTM1, UBE2N, UBE2V1]
GO:0000405	Eukaryotic Transcription Initiation	WikiPathways_08.11.2016	0.76	1	0.76	1	[-1]	Group042	51.1628	22	[CDK7, ERCC2, GTF2A2, GTF2E1, GTF2E2, GTF2F2, GTF2H4, MNAT1, POLR1D, POLR1E, POLR2E, POLR2F, POLR2G, POLR2H, POLR2J, POLR2K, POLR3E, TAF12, TAF6, TAF7, TAF9, TBP]
GO:0002513	Nanoparticle triggered regulated necrosis	WikiPathways_08.11.2016	0.76	1	0.76	1	[-1]	Group043	54.5455	6	[MAPK8, PLA2G4A, RIPK1, RIPK3, TICAM1, TRADD]
GO:0000399	Wnt Signaling Pathway and Pluripotency	WikiPathways_08.11.2016	0.76	1	0.5	1	[-1]	Group235	50.4673	54	[AXIN1, CCND1, CCND2, CD44, CREBBP, CSNK1E, CTBP1, CTBP2, CTNNB1, CTNND1, DVL1, EP300, FBXW2, FZD1, FZD10, FZD5, FZD6, FZD7, FZD8, FZD9, JUN, LDLR, LEF1, LRRK2, MAP2K4, MAP3K7, MAPK10, MYC, NLK, PAFAH1B1, PPARD, PPP2CA, PPP2R2A, PPP2R3A, PPP2R5C, PPP2R5E, PRKCA, PRKCB, PRKCD, PRKCE, PRKCG, PRKCI, PRKCQ, PRKCZ, PRKD1, RACGAP1, RHOA, TCF7L2, WNT1, WNT10A, WNT2B, WNT3A, WNT6, ZBTB33]
GO:0003876	BMP2-WNT4-FOXO1 Pathway in Human Primary Endometrial Stromal Cell Differentiation	WikiPathways_08.11.2016	0.78	1	0.78	1	[-1]	Group032	53.8462	7	[BCL2L11, BMP2, CTNNB1, DCN, FOXO1, SMAD5, SMAD9]
GO:0001423	Ganglio Sphingolipid Metabolism	WikiPathways_08.11.2016	0.78	1	0.85	1	[-1]	Group246	53.8462	7	[B3GALT4, B4GALNT1, SLC33A1, ST3GAL1, ST3GAL2, ST6GALNAC6, ST8SIA1]
GO:0000197	Cholesterol Biosynthesis	WikiPathways_08.11.2016	0.79	1	0.79	1	[-1]	Group111	53.3333	8	[CYP51A1, FDPS, HMGCR, HMGCS1, LSS, MSMO1, NSDHL, SQLE]
GO:0002436	Dopamine metabolism	WikiPathways_08.11.2016	0.79	1	0.044	1	[-1]	Group238	42.8571	6	[COMT, PPP2CA, PRKACA, PRKACB, SOD1, TH]
GO:0000229	Irinotecan Pathway	WikiPathways_08.11.2016	0.79	1	0.79	1	[-1]	Group143	42.8571	6	[ABCC1, ABCC2, BCHE, CES1, CYP3A5, NPC1]
GO:0003624	Lung fibrosis	WikiPathways_08.11.2016	0.8	1	0.8	1	[-1]	Group226	50.7937	32	[ATP11A, CALCA, CCL3, CCL4, CCL5, CEBPB, CSF2, CXCL2, DPP9, DSP, EDN1, ELMOD2, FAM13A, FGF1, FGF2, FGF7, GREM1, IGF1, IL6, MECP2, MMP2, MT2A, PARN, PDGFA, PTX3, SFTPA1, SFTPA2, SPP1, STN1, TERT, TGFB1, TNF]
GO:0000554	ACE Inhibitor Pathway	WikiPathways_08.11.2016	0.81	1	0.81	1	[-1]	Group069	52.9412	9	[ACE, AGT, ATP6AP2, BDKRB1, BDKRB2, CTSG, NOS3, REN, TGFB1]
GO:0000368	Mitochondrial LC-Fatty Acid Beta-Oxidation	WikiPathways_08.11.2016	0.81	1	0.74	1	[-1]	Group233	52.9412	9	[ACADM, ACADVL, ACSL3, ACSL4, CPT1A, HADH, HADHA, SCP2, SLC25A20]
GO:0000078	TCA Cycle	WikiPathways_08.11.2016	0.81	1	0.84	1	[-1]	Group244	52.9412	9	[ACO2, CS, DLST, FH, IDH2, MDH2, SDHC, SDHD, SUCLG2]
GO:0002328	Allograft Rejection	WikiPathways_08.11.2016	0.82	1	0.82	1	[-1]	Group149	50.6329	40	[C3, C5, CASP3, CASP7, CCL19, CD28, CD40, COL5A1, CSNK2A2, FAS, FOXP3, GABPA, GDNF, GZMB, HARS, HLA-A, HLA-B, HLA-C, HLA-DMA, HLA-DMB, HLA-DOA, HLA-DPA1, HLA-DPB1, HLA-DQA1, HLA-DQB1, HLA-DRA, HLA-DRB1, HLA-DRB5, HLA-E, HLA-F, LRRK2, MICA, PDGFRA, PRKCZ, STAT1, TGFB1, TNF, TUBA1B, VEGFA, VIM]
GO:0001772	Apoptosis Modulation and Signaling	WikiPathways_08.11.2016	0.83	1	0.53	1	[-1]	Group260	50	47	[AIFM1, AIFM2, BAD, BAG3, BAK1, BAX, BCL2A1, BCL2L11, BID, BIRC2, BIRC6, BNIP3, CASP10, CASP2, CASP3, CASP6, CASP7, CDKN2A, CFLAR, CRADD, CYCS, DIABLO, FAS, FOS, HN1, HSPA1A, IL1R1, JUN, MAP3K5, MAPK3, MAPK8, MCL1, NAIP, NFKBIA, PIDD1, PRKD1, PTPN13, RIPK1, TNFRSF10A, TNFRSF10B, TNFRSF10D, TNFRSF11B, TNFRSF1B, TNFSF10, TOLLIP, TRADD, XIAP]
GO:0000262	EBV LMP1 signaling	WikiPathways_08.11.2016	0.83	1	0.83	1	[-1]	Group126	45.8333	11	[CCL5, HSP90AA1, MAP3K3, MAP3K7, MAPK8, NFKBIA, PDLIM7, RELA, TNF, TRADD, TRAF1]
GO:0003612	Photodynamic therapy-induced NFE2L2 (NRF2) survival signaling	WikiPathways_08.11.2016	0.83	1	0.83	1	[-1]	Group221	45.8333	11	[ABCC2, ABCC3, ABCC6, CES1, FOS, GCLM, GSTP1, JUN, MAPK11, MAPK12, MAPK8]
GO:0003845	Canonical and Non-canonical Notch signaling	WikiPathways_08.11.2016	0.84	1	0.84	1	[-1]	Group020	51.8519	14	[ADAM10, DLK1, DLL1, DNER, JAG1, LEF1, MAML1, MAML3, MFAP1, MFAP2, NOTCH2, NOTCH3, RBPJ, RRAS]
GO:0002878	PPAR Alpha Pathway	WikiPathways_08.11.2016	0.84	1	0.84	1	[-1]	Group178	46.1538	12	[ACAA1, ACADM, APOA1, APOA5, CCND1, CPT1A, CYP4A11, DBI, KLK15, MYC, SCP2, SLC27A1]
GO:0002361	Gastric Cancer Network 1	WikiPathways_08.11.2016	0.85	1	0.85	1	[-1]	Group155	51.7241	15	[ACTL6A, C21orf33, CENPF, CEP192, GATS, H3F3A, HIST4H4, INO80D, LIN9, MCM4, MYBL2, NUP107, RNF216, SMOC2, TOP2A]
GO:0000500	Glycogen Metabolism	WikiPathways_08.11.2016	0.86	1	0.86	1	[-1]	Group058	47.2222	17	[AGL, CALM1, CALM2, CALM3, GBE1, GSK3A, GYG1, GYG2, PGM1, PHKB, PPP2CA, PPP2R2A, PPP2R3A, PPP2R5B, PPP2R5C, PPP2R5E, UGP2]
GO:0000666	Hypothetical Network for Drug Addiction	WikiPathways_08.11.2016	0.86	1	0.13	1	[-1]	Group242	46.875	15	[ADCY1, CAMK4, CREB1, GRIA1, GRIA3, GRIN2A, GRIN2C, GRIN2D, MAP2K1, MAPK3, PPA1, PRKACA, PRKCE, TERF2IP, ZHX2]
GO:0003617	Photodynamic therapy-induced NF-kB survival signaling	WikiPathways_08.11.2016	0.86	1	0.86	1	[-1]	Group225	51.4286	18	[BCL2A1, BIRC2, CCND1, CFLAR, CSF2, CXCL2, ICAM1, IL6, MMP1, MMP2, PTGS2, REL, RELA, RELB, SELE, TNF, VCAM1, VEGFA]
GO:0002857	Mesodermal Commitment Pathway	WikiPathways_08.11.2016	0.87	1	0.086	1	[-1]	Group248	49.6815	78	[ACACA, ACVR1, AEBP2, AHDC1, ARID5B, ATP8B2, AXIN1, BCORL1, BHLHE40, BMP4, BMPR1A, BMPR2, C6orf201, CCDC6, CCND1, CHRD, CRTC1, CTBP2, CUL4B, DLL1, DNMT3B, ELP4, EMSY, EPB41L5, EXT1, EXT2, FGFR1, FOXC1, FOXH1, FZD5, FZD8, GRHL2, HMGA2, HPRT1, INHBA, JAK2, JARID2, KDM6A, KIAA0754, KLF4, KLF5, LEF1, MACF1, MBTD1, MEIS1, MSGN1, NLK, PARP8, PAX6, PBX1, PBX3, PIAS1, PITX2, PLCH1, PPP2CA, PRKACA, PRKAR1…
GO:0002586	Aryl Hydrocarbon Receptor	WikiPathways_08.11.2016	0.88	1	0.88	1	[-1]	Group105	50	24	[AHR, CDC37, CDKN1B, CYP1B1, EGFR, EP300, ESR1, HSP90AA1, KLF6, KRAS, LPL, MAP2K1, MYC, NCOA7, NCOR2, NF1, NRAS, NRIP1, PSRC1, PTGS2, RB1, RELA, TNF, VEGFA]
GO:0002848	Differentiation Pathway	WikiPathways_08.11.2016	0.88	1	0.88	1	[-1]	Group165	50	24	[BMP4, CSF1, CSF1R, CXCR1, FGF1, FGF2, FST, IGF1, IL11, IL6, INHBA, INS, KIT, KITLG, NT5E, PDGFA, SHH, TGFB1, TGFB3, TNFSF11, VEGFA, WNT1, WNT2B, WNT3A]
GO:0002118	Arrhythmogenic Right Ventricular Cardiomyopathy	WikiPathways_08.11.2016	0.9	1	0.9	1	[-1]	Group132	50	38	[ACTB, ACTG1, ACTN2, ATP2A2, CACNA1C, CACNA1S, CACNA2D1, CACNA2D2, CACNG4, CACNG5, CACNG8, CDH2, CTNNA1, CTNNB1, DAG1, DES, DMD, DSP, GJA1, ITGA10, ITGA11, ITGA2B, ITGA5, ITGA6, ITGA7, ITGAV, ITGB1, ITGB4, ITGB5, ITGB7, ITGB8, JUP, LEF1, LMNA, SGCA, SGCB, SGCD, TCF7L2]
GO:0000045	G1 to S cell cycle control	WikiPathways_08.11.2016	0.9	1	0.82	1	[-1]	Group261	50	34	[ATM, CCND1, CCND2, CCNE2, CCNG2, CDK6, CDK7, CDKN1B, CDKN2A, CDKN2C, CDKN2D, CREB1, CREB3L4, E2F3, GADD45A, MCM2, MCM3, MCM4, MCM7, MDM2, MNAT1, MYC, ORC6, PCNA, POLE, POLE2, PRIM1, PRIM2, RB1, RPA1, RPA2, RPA3, TFDP1, WEE1]
GO:0002858	Ectoderm Differentiation	WikiPathways_08.11.2016	0.93	1	0.93	1	[-1]	Group170	49.3056	71	[AHI1, ANKS1B, ARHGAP10, ARHGDIG, ARHGEF9, BAZ1A, BCOR, BMP4, BMPR1A, BOC, C1GALT1, CCDC130, CDON, CELSR2, CLDN11, CTBP1, CTNNB1, DMD, EDA, ELOVL4, FHL2, FZD5, FZD8, GLB1, GLI3, HMGB2, JUP, LDB2, LY6E, MAFB, MECP2, MYC, MZF1, NF2, NFATC1, NLGN1, NLK, NR2F2, NUMA1, OGT, PAN2, PAX6, PGM1, PHF8, PI4KA, PIM1, PLXNA2, POU2F2, PPARD, PPFIBP2, PRKAG2, PTPN13, RAB8B, ROR2, SCHIP1, SDCBP, SERPINB6, SHH, S…
GO:0000528	Acetylcholine Synthesis	WikiPathways_08.11.2016	1	1	1	1	[-1]	Group063	42.8571	3	[ACHE, PCYT1A, PDHA1]
GO:0001539	Angiogenesis	WikiPathways_08.11.2016	1	1	1	1	[-1]	Group040	50	12	[AKT1, ANGPT1, CREBBP, FGF2, HIF1A, NOS3, PDGFRA, PIK3CA, PTK2, TIMP2, TIMP3, VEGFA]
GO:0003875	ATR Signaling	WikiPathways_08.11.2016	1	1	1	1	[-1]	Group031	44.4444	4	[ATR, RAD1, RAD9A, RPA1]
GO:0001425	Bone Morphogenic Protein (BMP) Signalling and Regulation	WikiPathways_08.11.2016	1	1	1	1	[-1]	Group169	50	6	[BMP2, BMPR1A, BMPR2, RUNX2, SMAD4, SMAD6]
GO:0003892	Development of pulmonary dendritic cells and macrophage subsets	WikiPathways_08.11.2016	1	1	1	1	[-1]	Group036	46.1538	6	[CSF1, CSF2, ID2, RUNX2, STAT3, TCF4]
GO:0001995	Effects of Nitric Oxide	WikiPathways_08.11.2016	1	1	1	1	[-1]	Group119	50	4	[AOX1, NOS1, NOS2, NOS3]
GO:0002197	Endothelin Pathways	WikiPathways_08.11.2016	1	1	1	1	[-1]	Group134	50	17	[ADRA1A, ATP2A2, CAD, CALCA, CALM1, CALM2, EDN1, EDNRA, GNAI1, GNAS, GNB5, GNG13, GUCY1B2, MAP2K1, MYLK, NOS3, PRKCA]
GO:0003297	EV release from cardiac cells and their functional effects	WikiPathways_08.11.2016	1	1	1	1	[-1]	Group197	44.4444	4	[ERBB4, KLF2, RGS16, TNF]
GO:0000186	Homologous recombination	WikiPathways_08.11.2016	1	1	0.81	1	[-1]	Group249	46.1538	6	[ATM, NBN, POLD4, RAD50, RAD51, RPA1]
GO:0003655	Hypothetical Craniofacial Development Pathway	WikiPathways_08.11.2016	1	1	1	1	[-1]	Group003	50	4	[FGD5P1, RHOA, TGFB3, WNT1]
GO:0000053	ID signaling pathway	WikiPathways_08.11.2016	1	1	1	1	[-1]	Group064	50	8	[ELK1, ELK3, ID1, ID2, ID3, RB1, RBL2, SREBF1]
GO:0000453	Inflammatory Response Pathway	WikiPathways_08.11.2016	1	1	1	1	[-1]	Group049	48.4848	16	[CD28, CD40, COL1A1, COL1A2, COL3A1, FN1, IL2RG, IL4R, LAMA5, LAMB1, LAMB2, LAMC1, THBS1, THBS3, TNFRSF1B, VTN]
GO:0001971	Integrated Cancer Pathway	WikiPathways_08.11.2016	1	1	1	1	[-1]	Group112	47.8261	22	[AKT1, ATF1, ATM, ATR, BACH1, BAD, BAX, CASP3, CDKN1B, MAP3K5, MDM2, MMP1, MSH2, MSH6, MYC, POU2F1, PTEN, RAD50, RB1, SMAD2, SMAD3, STAT1]
GO:0003301	MFAP5-mediated ovarian cancer cell motility and invasiveness	WikiPathways_08.11.2016	1	1	1	1	[-1]	Group200	50	6	[CREB5, ITGAV, ITPR3, JUN, PRKCQ, PTK2]
GO:0002338	miRNA Biogenesis	WikiPathways_08.11.2016	1	1	1	1	[-1]	Group247	50	4	[DICER1, DROSHA, RAN, XPO5]
GO:0000391	Mitochondrial Gene Expression	WikiPathways_08.11.2016	1	1	1	1	[-1]	Group038	50	10	[CAMK4, CREB1, ESRRA, GABPA, GABPB1, MTERF1, PPARGC1A, PPP3CA, SP1, TFB2M]
GO:0000727	Monoamine Transport	WikiPathways_08.11.2016	1	1	1	1	[-1]	Group093	50	16	[ACHE, AGT, AMPH, FBXO32, IL1R1, NECTIN2, NOS1, RBL2, SLC6A2, SLC6A3, STX1A, SYN1, TH, TNF, TNFRSF11B, UNC13B]
GO:0003630	NAD metabolism, sirtuins and aging	WikiPathways_08.11.2016	1	1	1	1	[-1]	Group230	45.4545	5	[FOXO1, FOXO3, HIF1A, NAMPT, SIRT3]
GO:0001433	Nucleotide-binding Oligomerization Domain (NOD) pathway	WikiPathways_08.11.2016	1	1	1	1	[-1]	Group187	48.7805	20	[CARD6, CARD8, CASP5, CASP7, ERBIN, HSP90AA1, MEFV, NAIP, NDUFA13, NFKBIA, NLRP1, NLRP3, NLRP4, NOD2, PRDM1, RAC1, RELA, RIPK2, SUGT1, XIAP]
GO:0000012	Osteoclast Signaling	WikiPathways_08.11.2016	1	1	1	1	[-1]	Group116	50	8	[ATP6V1G1, CTSK, GPR68, IFNAR1, MAPK8, SPP1, TNFRSF11B, TNFSF11]
GO:0003613	Photodynamic therapy-induced unfolded protein response	WikiPathways_08.11.2016	1	1	1	1	[-1]	Group222	48.2759	14	[ATF3, ATF4, ATF6, BCL2L11, CALR, DNAJB11, DNAJB9, DNAJC3, EIF2AK3, HSP90B1, HSPA5, NARS, PDIA6, PPP1R15A]
GO:0002805	RNA interference	WikiPathways_08.11.2016	1	1	1	1	[-1]	Group247	42.8571	3	[DICER1, DROSHA, XPO5]
GO:0000732	Serotonin Receptor 2 and ELK-SRF/GATA4 signaling	WikiPathways_08.11.2016	1	1	1	1	[-1]	Group096	50	10	[ELK1, GATA4, GNAQ, HTR2A, ITPR1, KRAS, MAP2K1, MAPK3, MAPKAPK2, NRAS]
GO:0002011	SREBF and miR33 in cholesterol and lipid homeostasis	WikiPathways_08.11.2016	1	1	1	1	[-1]	Group121	47.3684	9	[HMGCR, HMGCS1, LDLR, MTOR, PPARGC1A, PRKAA1, SCD, SREBF1, SREBF2]
GO:0001991	SRF and miRs in Smooth Muscle Differentiation and Proliferation	WikiPathways_08.11.2016	1	1	1	1	[-1]	Group117	46.1538	6	[CCND2, ELK1, KLF4, MEF2B, MEF2D, NKX2-5]
GO:0002453	TCA Cycle and Deficiency of Pyruvate Dehydrogenase complex (PDHc)	WikiPathways_08.11.2016	1	1	0.84	1	[-1]	Group244	50	8	[ACO1, CS, DLST, FH, IDH1, MDH1, PDHA1, SUCLG2]
GO:0001742	TP53 Network	WikiPathways_08.11.2016	1	1	1	1	[-1]	Group106	50	10	[ABL1, ATM, BAX, BID, CDKN2A, GADD45A, MDM2, MYC, SUMO1, TNFSF10]
GO:0001584	Type II diabetes mellitus	WikiPathways_08.11.2016	1	1	1	1	[-1]	Group073	50	11	[CACNA1A, INSR, IRS1, MAFA, MAPK8, MTOR, PRKCD, PRKCZ, SOCS4, SURF1, TNF]
GO:0003871	Valproic acid pathway	WikiPathways_08.11.2016	1	1	1	1	[-1]	Group028	46.1538	6	[ABAT, ACADSB, CYP2B6, HADHA, HADHB, HDAC1]

## Sheet: Reactome Transcriptomics
GOID	GOTerm	Ontology Source	Term PValue	Term PValue Corrected with Bonferroni step down	Group PValue	Group PValue Corrected with Bonferroni step down	GOLevels	GOGroups	% Associated Genes	Nr. Genes	Associated Genes Found
GO:0001582	Histidine catabolism	REACTOME_Pathways_09.11.2016	0.72	1	0.72	1	[-1]	Group000	37.5	3	[AMDHD1, CARNS1, FTCD]
GO:0001585	Phenylalanine and tyrosine catabolism	REACTOME_Pathways_09.11.2016	0.22	1	0.22	1	[-1]	Group001	27.2727	3	[FAH, HGD, KYAT1]
GO:0001586	Tryptophan catabolism	REACTOME_Pathways_09.11.2016	0.54	1	0.54	1	[-1]	Group002	36.3636	4	[AADAT, ACMSD, KMO, KYAT1]
GO:0001588	Creatine metabolism	REACTOME_Pathways_09.11.2016	0.22	1	0.22	1	[-1]	Group003	27.2727	3	[GAMT, SLC6A7, SLC6A8]
GO:0001590	Pentose phosphate pathway (hexose monophosphate shunt)	REACTOME_Pathways_09.11.2016	0.33	1	0.33	1	[-1]	Group004	66.6667	6	[DERA, PGD, PGLS, PGM2, RPE, TALDO1]
GO:0001591	Ethanol oxidation	REACTOME_Pathways_09.11.2016	0.14	1	0.14	1	[-1]	Group005	25	3	[ACSS1, ADH1C, ALDH1A1]
GO:0001613	Recycling of eIF2:GDP	REACTOME_Pathways_09.11.2016	0.72	1	0.72	1	[-1]	Group007	37.5	3	[EIF2B3, EIF2S1, EIF2S2]
GO:0001619	Pyrimidine catabolism	REACTOME_Pathways_09.11.2016	0.54	1	0.54	1	[-1]	Group008	36.3636	4	[DPYD, NT5E, NT5M, TYMP]
GO:0001649	RNA Polymerase III Transcription Termination	REACTOME_Pathways_09.11.2016	1	1	1	1	[-1]	Group009	50	12	[NFIB, NFIC, POLR1C, POLR1D, POLR2E, POLR2F, POLR2H, POLR2K, POLR2L, POLR3A, POLR3E, POLR3G]
GO:0001667	Activation, myristolyation of BID and translocation to mitochondria	REACTOME_Pathways_09.11.2016	0.36	1	0.36	1	[-1]	Group010	75	3	[BID, GZMB, NMT1]
GO:0001197	Uptake and function of diphtheria toxin	REACTOME_Pathways_09.11.2016	0.11	1	0.11	1	[-1]	Group012	83.3333	5	[CD9, EEF2, HBEGF, HSP90AA1, HSP90AB1]
GO:0000176	Reversible hydration of carbon dioxide	REACTOME_Pathways_09.11.2016	0.77	1	0.77	1	[-1]	Group014	41.6667	5	[CA13, CA3, CA5B, CA6, CA9]
GO:0001199	TCF7L2 mutants don't bind CTBP	REACTOME_Pathways_09.11.2016	0.11	1	0.11	1	[-1]	Group015	100	3	[CTBP1, CTBP2, TCF7L2]
GO:0001707	Transport of fatty acids	REACTOME_Pathways_09.11.2016	1	1	1	1	[-1]	Group016	50	4	[APOD, LCN9, SLC27A1, SLC27A4]
GO:0001716	Transport of organic anions	REACTOME_Pathways_09.11.2016	0.22	1	0.22	1	[-1]	Group017	27.2727	3	[ALB, SLC16A2, SLCO2A1]
GO:0001731	Phosphate bond hydrolysis by NTPDase proteins	REACTOME_Pathways_09.11.2016	1	1	1	1	[-1]	Group018	50	4	[ENTPD1, ENTPD4, ENTPD6, ENTPD7]
GO:0001740	Signaling by plasma membrane FGFR1 fusions	REACTOME_Pathways_09.11.2016	0.11	1	0.11	1	[-1]	Group019	100	3	[BAG4, ERLIN2, FGFR1]
GO:0001747	Interleukin-19, 20, 22, 24	REACTOME_Pathways_09.11.2016	0.5	1	0.5	1	[-1]	Group020	33.3333	3	[IL10RB, IL22RA2, IL24]
GO:0001208	TNFR1-induced proapoptotic signaling	REACTOME_Pathways_09.11.2016	1	1	1	1	[-1]	Group021	46.1538	6	[CYLD, OTUD7B, RIPK1, TNF, TRADD, TRAF2]
GO:0000182	Acyl chain remodeling of DAG and TAG	REACTOME_Pathways_09.11.2016	0.72	1	0.72	1	[-1]	Group022	57.1429	4	[DGAT1, MGLL, PNPLA2, PNPLA3]
GO:0001776	RAB GEFs exchange GTP for GDP on RABs	REACTOME_Pathways_09.11.2016	0.018	1	0.018	1	[-1]	Group023	61.7978	55	[AKT1, AKT2, AKT3, ALS2, ANKRD27, CCZ1, CHM, CHML, DENND1B, DENND1C, DENND2A, DENND2C, DENND3, DENND4B, DENND4C, DENND5A, DENND5B, DENND6A, DENND6B, GAPVD1, GDI2, HPS4, MON1B, RAB10, RAB12, RAB13, RAB18, RAB1A, RAB1B, RAB21, RAB27B, RAB31, RAB32, RAB35, RAB38, RAB3GAP1, RAB3GAP2, RAB5A, RAB7A, RAB8B, RAB9A, RABGEF1, RIC1, RIN2, RINL, SBF1, SBF2, TRAPPC1, TRAPPC10, TRAPPC11, TRAPPC12, TRAPPC13, TR…
GO:0001214	Synthesis of diphthamide-EEF2	REACTOME_Pathways_09.11.2016	1	1	1	1	[-1]	Group024	50	4	[DNAJC24, DPH3, DPH5, EEF2]
GO:0000187	Hydrolysis of LPC	REACTOME_Pathways_09.11.2016	0.33	1	0.33	1	[-1]	Group025	66.6667	6	[GPCPD1, JMJD7-PLA2G4B, PLA2G4A, PLA2G4E, PLA2G4F, PLBD1]
GO:0001807	Molybdenum cofactor biosynthesis	REACTOME_Pathways_09.11.2016	0.36	1	0.36	1	[-1]	Group026	75	3	[GPHN, MOCS2, MOCS3]
GO:0001225	RA biosynthesis pathway	REACTOME_Pathways_09.11.2016	0.52	1	0.52	1	[-1]	Group028	40.9091	9	[ADH1C, AKR1C3, ALDH1A1, CYP26B1, CYP26C1, DHRS3, DHRS4, RDH11, RDH14]
GO:0000191	Synthesis of PC	REACTOME_Pathways_09.11.2016	0.45	1	0.45	1	[-1]	Group029	57.1429	16	[ABHD3, ACHE, BCHE, CEPT1, CHKB, CHPT1, CSNK2A1, CSNK2A2, LPCAT1, LPIN1, PCTP, PCYT1A, PHOSPHO1, SLC44A1, SLC44A2, SLC44A3]
GO:0001834	Growth hormone receptor signaling	REACTOME_Pathways_09.11.2016	0.67	1	0.67	1	[-1]	Group030	54.5455	12	[GH1, IRS1, IRS2, JAK2, LYN, MAPK3, PTPN1, PTPN6, SOCS1, SOCS3, STAT3, STAT5B]
GO:0001837	Antigen Presentation: Folding, assembly and peptide loading of class I MHC	REACTOME_Pathways_09.11.2016	0.002	0.6	0.002	0.43	[-1]	Group031	80	20	[BCAP31, CALR, CANX, ERAP1, ERAP2, HLA-A, HLA-B, HLA-C, HLA-E, HLA-F, HSPA5, PDIA3, SAR1B, SEC13, SEC23A, SEC24A, SEC24B, SEC24D, SEC31A, TAPBP]
GO:0001153	Synthesis and interconversion of nucleotide di- and triphosphates	REACTOME_Pathways_09.11.2016	0.55	1	0.55	1	[-1]	Group032	56	14	[AK1, AK2, AK4, AK8, CMPK1, CTPS2, DTYMK, GLRX, NME1, NME2, NUDT13, RRM1, RRM2B, TXN]
GO:0000194	Synthesis of PE	REACTOME_Pathways_09.11.2016	0.41	1	0.41	1	[-1]	Group033	61.5385	8	[CEPT1, CHKB, ETNK1, ETNK2, LPIN1, PCYT2, PHOSPHO1, SELENOI]
GO:0000196	Synthesis of PIPs at the ER membrane	REACTOME_Pathways_09.11.2016	0.11	1	0.11	1	[-1]	Group034	100	3	[PI4K2B, PI4KA, SACM1L]
GO:0000210	Glucuronidation	REACTOME_Pathways_09.11.2016	0.0015	0.45	0.0015	0.33	[-1]	Group035	14.2857	3	[UGDH, UGP2, UGT1A6]
GO:0000213	Fibronectin matrix formation	REACTOME_Pathways_09.11.2016	0.44	1	0.44	1	[-1]	Group036	66.6667	4	[CEACAM6, FN1, ITGA5, ITGB1]
GO:0000230	Recycling of bile acids and salts	REACTOME_Pathways_09.11.2016	0.077	1	0.077	1	[-1]	Group037	25	4	[ABCC3, ALB, FABP6, NCOA2]
GO:0000250	Golgi Cisternae Pericentriolar Stack Reorganization	REACTOME_Pathways_09.11.2016	1	1	1	1	[-1]	Group038	46.1538	6	[GOLGA2, GORASP2, RAB1A, RAB1B, RAB2A, USO1]
GO:0001232	Aflatoxin activation and detoxification	REACTOME_Pathways_09.11.2016	0.23	1	0.23	1	[-1]	Group039	33.3333	6	[AKR7A2, CYP2A13, CYP3A5, GGT1, GGT7, MGST3]
GO:0000259	Formation of ATP by chemiosmotic coupling	REACTOME_Pathways_09.11.2016	0.017	1	0.017	1	[-1]	Group040	77.7778	14	[ATP5A1, ATP5C1, ATP5E, ATP5F1, ATP5G1, ATP5G2, ATP5G3, ATP5H, ATP5I, ATP5J, ATP5J2, ATP5L, ATP5O, ATP5S]
GO:0000265	Hormone-sensitive lipase (HSL)-mediated triacylglycerol hydrolysis	REACTOME_Pathways_09.11.2016	1	1	1	1	[-1]	Group041	50	10	[ABHD5, CAV1, FABP5, FABP6, FABP7, MGLL, PPP1CB, PPP1CC, PRKACA, PRKACB]
GO:0000302	Sphingolipid de novo biosynthesis	REACTOME_Pathways_09.11.2016	0.63	1	0.63	1	[-1]	Group042	53.6585	22	[ACER1, ALDH3B1, CERS2, CERS5, CERS6, DEGS1, KDSR, ORMDL2, ORMDL3, PLPP3, PRKD1, PRKD2, PRKD3, SGMS1, SGPL1, SGPP1, SPHK1, SPHK2, SPTLC1, SPTSSA, VAPA, VAPB]
GO:0000116	Ca2+ activated K+ channels	REACTOME_Pathways_09.11.2016	1	1	1	1	[-1]	Group043	44.4444	4	[KCNMB2, KCNMB4, KCNN2, KCNN4]
GO:0000381	Classical antibody-mediated complement activation	REACTOME_Pathways_09.11.2016	0.44	1	0.44	1	[-1]	Group044	66.6667	4	[C1QA, C1QB, C1QC, C1R]
GO:0000382	Alternative complement activation	REACTOME_Pathways_09.11.2016	0.027	1	0.027	1	[-1]	Group045	100	5	[C3, CFB, CFD, CFP, GZMM]
GO:0000426	DARPP-32 events	REACTOME_Pathways_09.11.2016	0.23	1	0.23	1	[-1]	Group046	61.5385	16	[CALM1, CALM2, CALM3, PDE4A, PDE4B, PDE4C, PDE4D, PPP2CA, PPP3CA, PPP3CB, PPP3CC, PRKACA, PRKACB, PRKAR1A, PRKAR1B, PRKAR2B]
GO:0000454	Synthesis of IPs in the nucleus	REACTOME_Pathways_09.11.2016	0.36	1	0.36	1	[-1]	Group047	75	3	[IP6K1, IP6K2, IPPK]
GO:0000500	Digestion of dietary lipid	REACTOME_Pathways_09.11.2016	0.077	1	0.077	1	[-1]	Group048	25	4	[LIPG, LMF1, LMF2, PNLIPRP1]
GO:0000542	Vitamin B1 (thiamin) metabolism	REACTOME_Pathways_09.11.2016	0.2	1	0.2	1	[-1]	Group050	80	4	[SLC19A2, SLC19A3, SLC25A19, TPK1]
GO:0000544	Vitamin B2 (riboflavin) metabolism	REACTOME_Pathways_09.11.2016	1	1	1	1	[-1]	Group051	42.8571	3	[ENPP1, SLC52A1, SLC52A2]
GO:0000560	Immunoregulatory interactions between a Lymphoid and a non-Lymphoid cell	REACTOME_Pathways_09.11.2016	0.85	1	0.85	1	[-1]	Group052	47.9339	58	[C3, CD1B, CD300LB, CD300LF, CD33, CD3D, CD3E, CD3G, CD81, CD8A, CD8B, CDH1, CLEC2B, CLEC2D, COL1A1, COL1A2, COL2A1, COL3A1, FCGR3A, HCST, HLA-A, HLA-B, HLA-C, HLA-E, HLA-F, ICAM1, ICAM2, ICAM3, ICAM4, IFITM1, ITGB1, ITGB2, ITGB7, JAML, KIR2DL4, KIR3DL1, KLRB1, KLRG1, LAIR1, LILRA1, LILRA3, LILRA4, LILRB4, MICA, MICB, NCR1, NCR3, NECTIN2, PVR, SFTPD, SIGLEC12, SIGLEC5, SIGLEC7, SIGLEC9, TREM1, TR…
GO:0000569	Signaling by BMP	REACTOME_Pathways_09.11.2016	0.83	1	0.83	1	[-1]	Group053	52.1739	12	[BMP2, BMPR1A, BMPR2, CHRDL1, FSTL1, SMAD4, SMAD5, SMAD6, SMAD9, SMURF2, UBE2D3, ZFYVE16]
GO:0000576	Metabolism of Angiotensinogen to Angiotensins	REACTOME_Pathways_09.11.2016	0.47	1	0.47	1	[-1]	Group054	58.8235	10	[ACE, AGT, ANPEP, ATP6AP2, C9orf3, CPA3, CTSG, CTSZ, MME, REN]
GO:0000590	ERKs are inactivated	REACTOME_Pathways_09.11.2016	0.38	1	0.38	1	[-1]	Group055	33.3333	4	[DUSP3, DUSP4, MAPK3, PPP2CA]
GO:0000609	Linoleic acid (LA) metabolism	REACTOME_Pathways_09.11.2016	0.17	1	0.17	1	[-1]	Group056	75	6	[ABCD1, ELOVL1, ELOVL3, ELOVL5, FADS1, FADS2]
GO:0000627	Regulation of gene expression in late stage (branching morphogenesis) pancreatic bud precursor cells	REACTOME_Pathways_09.11.2016	1	1	1	1	[-1]	Group057	42.8571	3	[HNF1B, NEUROG3, RBPJ]
GO:0000631	PECAM1 interactions	REACTOME_Pathways_09.11.2016	0.37	1	0.37	1	[-1]	Group058	63.6364	7	[INPP5D, ITGAV, LYN, PECAM1, PTPN11, PTPN6, YES1]
GO:0000063	Inhibition of replication initiation of damaged DNA by RB1/E2F1	REACTOME_Pathways_09.11.2016	1	1	1	1	[-1]	Group059	46.1538	6	[POLA1, PPP2CA, PRIM1, PRIM2, RB1, TFDP1]
GO:0000669	Ubiquinol biosynthesis	REACTOME_Pathways_09.11.2016	1	1	1	1	[-1]	Group060	50	4	[COQ3, COQ5, COQ9, PDSS2]
GO:0000676	Hyaluronan uptake and degradation	REACTOME_Pathways_09.11.2016	0.77	1	0.77	1	[-1]	Group061	41.6667	5	[CD44, CHP1, GUSB, HEXA, HMMR]
GO:0000689	Downregulation of SMAD2/3:SMAD4 transcriptional activity	REACTOME_Pathways_09.11.2016	0.29	1	0.29	1	[-1]	Group062	60.8696	14	[HDAC1, NCOR2, NEDD4L, PPM1A, RNF111, SMAD2, SMAD3, SMAD4, SMURF2, TGIF1, TRIM33, UBC, UBE2D3, USP9X]
GO:0001242	Phase 3 - rapid repolarisation	REACTOME_Pathways_09.11.2016	1	1	1	1	[-1]	Group063	50	4	[AKAP9, KCNE1, KCNE3, KCNE4]
GO:0000068	Effects of PIP2 hydrolysis	REACTOME_Pathways_09.11.2016	1	1	1	1	[-1]	Group064	48.1481	13	[ABHD6, DGKB, DGKD, DGKQ, DGKZ, ITPR1, ITPR2, ITPR3, MGLL, PRKCD, PRKCE, PRKCQ, RASGRP2]
GO:0000702	Phosphate bond hydrolysis by NUDT proteins	REACTOME_Pathways_09.11.2016	0.057	1	0.057	1	[-1]	Group065	100	4	[ADPRM, NUDT15, NUDT16, NUDT5]
GO:0000705	Metabolism of ingested SeMet, Sec, MeSec into H2Se	REACTOME_Pathways_09.11.2016	1	1	1	1	[-1]	Group066	44.4444	4	[CBS, CTH, NNMT, SCLY]
GO:0000719	MASTL Facilitates Mitotic Progression	REACTOME_Pathways_09.11.2016	0.34	1	0.34	1	[-1]	Group067	30	3	[ARPP19, ENSA, PPP2CA]
GO:0000777	Syndecan interactions	REACTOME_Pathways_09.11.2016	0.00013	0.041	0.00013	0.031	[-1]	Group068	85.1852	23	[CASK, COL1A1, COL1A2, COL3A1, COL5A1, COL5A2, FGF2, FN1, ITGA6, ITGAV, ITGB1, ITGB4, ITGB5, PRKCA, SDC1, SDC2, SDC3, SDC4, TGFB1, THBS1, TNC, TRAPPC4, VTN]
GO:0000799	SUMOylation of transcription factors	REACTOME_Pathways_09.11.2016	0.32	1	0.32	1	[-1]	Group069	62.5	10	[CDKN2A, MDM2, MITF, MTA1, PIAS1, SP3, SUMO1, SUMO2, SUMO3, TP53BP1]
GO:0000800	WNT ligand biogenesis and trafficking	REACTOME_Pathways_09.11.2016	0.55	1	0.55	1	[-1]	Group070	42.3077	11	[PORCN, SNX3, TMED5, VPS26A, VPS29, WLS, WNT1, WNT10A, WNT2B, WNT3A, WNT6]
GO:0000805	TRP channels	REACTOME_Pathways_09.11.2016	0.57	1	0.57	1	[-1]	Group071	42.8571	12	[MCOLN3, MLKL, RIPK1, RIPK3, TRPA1, TRPC1, TRPC4, TRPM2, TRPM3, TRPV2, TRPV4, TRPV6]
GO:0000844	Apoptotic cleavage of cell adhesion proteins	REACTOME_Pathways_09.11.2016	1	1	1	1	[-1]	Group072	50	5	[CASP3, CDH1, DSP, TJP1, TJP2]
GO:0000845	Amino acid transport across the plasma membrane	REACTOME_Pathways_09.11.2016	0.043	1	0.043	1	[-1]	Group073	30	9	[SLC16A10, SLC36A1, SLC38A2, SLC43A1, SLC43A2, SLC6A6, SLC7A1, SLC7A10, SLC7A5]
GO:0000883	Negative regulation of TCF-dependent signaling by WNT ligand antagonists	REACTOME_Pathways_09.11.2016	0.035	1	0.035	1	[-1]	Group074	20	3	[KREMEN1, KREMEN2, WNT3A]
GO:0001155	Pyrimidine biosynthesis	REACTOME_Pathways_09.11.2016	0.2	1	0.2	1	[-1]	Group075	80	4	[CAD, DHODH, TYMS, UMPS]
GO:0000893	Chemokine receptors bind chemokines	REACTOME_Pathways_09.11.2016	0.041	1	0.041	1	[-1]	Group076	33.3333	16	[ACKR3, CCL16, CCL19, CCL27, CCL5, CCR5, CCRL2, CX3CL1, CXCL1, CXCL16, CXCL2, CXCL5, CXCR1, CXCR2, CXCR4, XCR1]
GO:0000908	ATF6 (ATF6-alpha) activates chaperone genes	REACTOME_Pathways_09.11.2016	0.1	1	0.1	1	[-1]	Group077	77.7778	7	[ATF4, ATF6, CALR, HSP90B1, HSPA5, NFYB, NFYC]
GO:0000913	Olfactory Signaling Pathway	REACTOME_Pathways_09.11.2016	4.8e-45	1.6e-42	4.8e-45	1.1e-42	[-1]	Group078	14.9333	56	[GNB1, OR10C1, OR10G8, OR10H2, OR10J5, OR11A1, OR13H1, OR13J1, OR14J1, OR1B1, OR1D2, OR1J2, OR1J4, OR1K1, OR1L1, OR1L6, OR1N1, OR1N2, OR1S2, OR2A2, OR2A42, OR2AG2, OR2B6, OR2G6, OR2H1, OR2H2, OR2Y1, OR3A3, OR4D6, OR4F29, OR4F4, OR4K5, OR4N4, OR4Q3, OR4S1, OR51A7, OR51S1, OR51T1, OR52B6, OR52N1, OR52N2, OR52N5, OR52R1, OR5C1, OR5D14, OR5D18, OR5H1, OR5H6, OR5K1, OR5K3, OR5V1, OR6B2, OR6Y1, OR8A1, …
GO:0000918	Nuclear Receptor transcription pathway	REACTOME_Pathways_09.11.2016	0.25	1	0.25	1	[-1]	Group080	39.4737	15	[ESR1, ESRRA, ESRRG, NR0B2, NR1D2, NR1H2, NR2C1, NR2E1, NR2F6, NR4A2, PPARD, RARA, RARB, RORA, THRA]
GO:0000927	CD28 dependent Vav1 pathway	REACTOME_Pathways_09.11.2016	0.76	1	0.76	1	[-1]	Group081	54.5455	6	[CD28, CDC42, PAK1, PAK2, RAC1, VAV1]
GO:0000931	Alpha-oxidation of phytanate	REACTOME_Pathways_09.11.2016	0.36	1	0.36	1	[-1]	Group082	75	3	[HACL1, PHYH, SLC25A17]
GO:0000932	Glyoxylate metabolism and glycine degradation	REACTOME_Pathways_09.11.2016	0.69	1	0.69	1	[-1]	Group083	44	11	[AMT, BCKDHB, DBT, DHTKD1, DLST, GCSH, HAO1, NDUFAB1, PDHA1, PDHB, PDHX]
GO:0000943	Striated Muscle Contraction	REACTOME_Pathways_09.11.2016	0.13	1	0.13	1	[-1]	Group084	36.1111	13	[ACTN2, DES, DMD, MYBPC3, TCAP, TMOD1, TNNI1, TNNI3, TNNT1, TPM3, TPM4, TTN, VIM]
GO:0000967	EPH-ephrin mediated repulsion of cells	REACTOME_Pathways_09.11.2016	1	1	1	1	[-1]	Group085	48.9796	24	[ACTB, ACTG1, ADAM10, AP2B1, AP2M1, AP2S1, APH1A, APH1B, CLTA, CLTB, DNM1, EFNA5, EPHA10, EPHA3, EPHA7, EPHA8, EPHB2, LYN, MMP2, NCSTN, RAC1, TIAM1, VAV2, YES1]
GO:0000976	Acetylcholine regulates insulin secretion	REACTOME_Pathways_09.11.2016	0.75	1	0.75	1	[-1]	Group086	40	4	[GNA11, GNAQ, MARCKS, PRKCA]
GO:0000984	Sialic acid metabolism	REACTOME_Pathways_09.11.2016	0.86	1	0.86	1	[-1]	Group087	51.5152	17	[CMAS, CTSA, GLB1, GNE, NANS, NPL, SLC17A5, SLC35A1, ST3GAL1, ST3GAL2, ST6GAL1, ST6GAL2, ST6GALNAC1, ST6GALNAC2, ST6GALNAC4, ST6GALNAC6, ST8SIA1]
GO:0000989	Sema4D mediated inhibition of cell attachment and migration	REACTOME_Pathways_09.11.2016	0.17	1	0.17	1	[-1]	Group088	75	6	[MET, PLXNB1, RAC1, RHOA, RND1, RRAS]
GO:0001006	Netrin mediated repulsion signals	REACTOME_Pathways_09.11.2016	0.74	1	0.74	1	[-1]	Group089	55.5556	5	[NTN1, PTK2, PTPN11, UNC5B, UNC5C]
GO:0001007	Ligand-independent caspase activation via DCC	REACTOME_Pathways_09.11.2016	1	1	1	1	[-1]	Group090	50	5	[APPL1, CASP3, DAPK2, DAPK3, UNC5B]
GO:0001008	Role of second messengers in netrin-1 signaling	REACTOME_Pathways_09.11.2016	0.75	1	0.75	1	[-1]	Group091	40	4	[NTN1, PITPNA, TRPC1, TRPC4]
GO:0001011	Lysosphingolipid and LPA receptors	REACTOME_Pathways_09.11.2016	0.42	1	0.42	1	[-1]	Group092	35.7143	5	[LPAR1, LPAR2, PLPPR2, PLPPR3, S1PR3]
GO:0001012	Opsins	REACTOME_Pathways_09.11.2016	1	1	1	1	[-1]	Group093	50	5	[OPN1SW, OPN3, OPN4, OPN5, RGR]
GO:0001013	Calcitonin-like ligand receptors	REACTOME_Pathways_09.11.2016	0.75	1	0.75	1	[-1]	Group094	40	4	[ADM, ADM2, CALCA, CALCR]
GO:0001016	Class C/3 (Metabotropic glutamate/pheromone receptors)	REACTOME_Pathways_09.11.2016	0.00012	0.039	0.00012	0.029	[-1]	Group095	18.4211	7	[GRM3, GRM7, TAS1R2, TAS1R3, TAS2R31, TAS2R38, TAS2R43]
GO:0001017	Nectin/Necl trans heterodimerization	REACTOME_Pathways_09.11.2016	0.72	1	0.72	1	[-1]	Group096	57.1429	4	[CADM1, NECTIN2, NECTIN3, PVR]
GO:0001024	Bicarbonate transporters	REACTOME_Pathways_09.11.2016	1	1	1	1	[-1]	Group097	50	5	[AHCYL2, SLC4A1, SLC4A4, SLC4A5, SLC4A8]
GO:0001030	Sodium/Proton exchangers	REACTOME_Pathways_09.11.2016	1	1	1	1	[-1]	Group098	44.4444	4	[SLC9A5, SLC9A6, SLC9A8, SLC9A9]
GO:0001032	Cation-coupled Chloride cotransporters	REACTOME_Pathways_09.11.2016	0.72	1	0.72	1	[-1]	Group099	57.1429	4	[SLC12A3, SLC12A5, SLC12A6, SLC12A7]
GO:0001039	Multifunctional anion exchangers	REACTOME_Pathways_09.11.2016	0.74	1	0.74	1	[-1]	Group100	55.5556	5	[SLC26A1, SLC26A11, SLC26A4, SLC26A6, SLC5A12]
GO:0001058	mRNA decay by 5' to 3' exoribonuclease	REACTOME_Pathways_09.11.2016	0.018	1	0.018	1	[-1]	Group101	80	12	[DCP1A, DCP1B, DCP2, DDX6, EDC4, LSM1, LSM2, LSM3, LSM5, LSM6, LSM7, XRN1]
GO:0001269	Organic anion transport	REACTOME_Pathways_09.11.2016	0.027	1	0.027	1	[-1]	Group102	100	5	[SLC22A11, SLC22A12, SLC22A6, SLC22A7, SLC22A8]
GO:0001075	Depolymerisation of the Nuclear Lamina	REACTOME_Pathways_09.11.2016	0.78	1	0.78	1	[-1]	Group103	53.8462	7	[CNEP1R1, CTDNEP1, LEMD2, LEMD3, LPIN1, PRKCA, PRKCB]
GO:0001090	Formyl peptide receptors bind formyl peptides and many other ligands	REACTOME_Pathways_09.11.2016	0.064	1	0.064	1	[-1]	Group104	85.7143	6	[ANXA1, APP, FPR1, FPR2, HEBP1, SAA1]
GO:0001092	Interaction between L1 and Ankyrins	REACTOME_Pathways_09.11.2016	0.59	1	0.59	1	[-1]	Group105	54.8387	17	[ACTB, ACTG1, ANK1, ANK2, ANK3, KCNQ2, KCNQ3, NFASC, SCN2B, SCN3B, SCN4B, SCN5A, SCN8A, SPTB, SPTBN1, SPTBN2, SPTBN4]
GO:0001097	Type I hemidesmosome assembly	REACTOME_Pathways_09.11.2016	0.76	1	0.76	1	[-1]	Group106	54.5455	6	[CD151, DST, ITGA6, ITGB4, LAMB3, PLEC]
GO:0001099	Synthesis of Dolichyl-phosphate	REACTOME_Pathways_09.11.2016	1	1	1	1	[-1]	Group107	50	3	[DHDDS, DOLPP1, NUS1]
GO:0001101	Synthesis of GDP-mannose	REACTOME_Pathways_09.11.2016	0.68	1	0.68	1	[-1]	Group108	60	3	[GMPPA, MPI, PMM2]
GO:0001102	Synthesis of UDP-N-acetyl-glucosamine	REACTOME_Pathways_09.11.2016	0.17	1	0.17	1	[-1]	Group109	75	6	[GFPT1, GFPT2, GNPNAT1, PGM3, RENBP, UAP1]
GO:0001109	NrCAM interactions	REACTOME_Pathways_09.11.2016	1	1	1	1	[-1]	Group110	42.8571	3	[ANK1, DLG1, DLG3]
GO:0001110	CHL1 interactions	REACTOME_Pathways_09.11.2016	1	1	1	1	[-1]	Group111	44.4444	4	[ANK1, ITGA10, ITGB1, NRP1]
GO:0001113	Interleukin-17 signaling	REACTOME_Pathways_09.11.2016	0.49	1	0.49	1	[-1]	Group112	62.5	5	[IL17C, IL17F, IL17RA, IL17RB, IL17RC]
GO:0001120	Activation of the AP-1 family of transcription factors	REACTOME_Pathways_09.11.2016	0.54	1	0.54	1	[-1]	Group113	60	6	[FOS, JUN, MAPK10, MAPK11, MAPK3, MAPK8]
GO:0001293	ARL13B-mediated ciliary trafficking of INPP5E	REACTOME_Pathways_09.11.2016	0.11	1	0.11	1	[-1]	Group114	100	3	[ARL13B, INPP5E, PDE6D]
GO:0001296	RHO GTPases activate CIT	REACTOME_Pathways_09.11.2016	0.22	1	0.22	1	[-1]	Group115	64.7059	11	[CDKN1B, MYH10, MYH14, MYH9, MYL12A, MYL12B, MYL6, MYL9, RAC1, RHOA, RHOB]
GO:0001297	RHO GTPases activate KTN1	REACTOME_Pathways_09.11.2016	0.37	1	0.37	1	[-1]	Group116	63.6364	7	[CDC42, KIF5B, KLC2, KTN1, RAC1, RHOA, RHOG]
GO:0001303	TP53 Regulates Metabolic Genes	REACTOME_Pathways_09.11.2016	0.0011	0.34	0.0011	0.25	[-1]	Group117	67.0732	55	[AGO1, AGO2, AKT1, AKT2, AKT3, COX11, COX14, COX16, COX20, COX4I1, COX6A1, COX6B1, COX6C, COX7A2L, COX7B, COX7C, COX8A, CYCS, DDIT4, GLS, GPI, GPX2, LAMTOR2, LAMTOR3, LAMTOR4, LAMTOR5, LRPPRC, MLST8, MTOR, PRDX1, PRKAA1, PRKAA2, PRKAB2, PRKAG1, PRKAG2, PRKAG3, PTEN, RHEB, RPTOR, RRAGA, RRAGB, RRAGD, RRM2B, SCO1, SFN, SURF1, TNRC6C, TSC1, TXN, YWHAB, YWHAE, YWHAG, YWHAH, YWHAQ, YWHAZ]
GO:0001363	Catabolism of glucuronate to xylulose-5-phosphate	REACTOME_Pathways_09.11.2016	0.68	1	0.68	1	[-1]	Group118	60	3	[AKR1A1, DCXR, SORD]
GO:0001370	RHO GTPases Activate Rhotekin and Rhophilins	REACTOME_Pathways_09.11.2016	0.74	1	0.74	1	[-1]	Group119	55.5556	5	[LIN7B, RHOA, RHOB, RHPN2, ROPN1]
GO:0001374	TNFs bind their physiological receptors	REACTOME_Pathways_09.11.2016	1	1	1	1	[-1]	Group120	48.2759	14	[EDA, EDAR, EDARADD, TNFRSF11B, TNFRSF14, TNFRSF18, TNFRSF1B, TNFRSF4, TNFSF11, TNFSF13B, TNFSF14, TNFSF4, TNFSF8, TNFSF9]
GO:0001383	TNF receptor superfamily (TNFSF) members mediating non-canonical NF-kB pathway	REACTOME_Pathways_09.11.2016	0.63	1	0.63	1	[-1]	Group121	41.1765	7	[BIRC2, LTB, TNFSF11, TNFSF12, TNFSF13B, TNFSF14, TRAF2]
GO:0001384	Protein repair	REACTOME_Pathways_09.11.2016	0.44	1	0.44	1	[-1]	Group122	66.6667	4	[MSRA, MSRB3, PCMT1, TXN]
GO:0001408	Ovarian tumor domain proteases	REACTOME_Pathways_09.11.2016	0.4	1	0.4	1	[-1]	Group123	41.6667	15	[DDX58, ESR1, MAVS, NOD2, OTUB2, OTUD7B, PTEN, RHOA, RIPK1, RIPK2, RNF135, TNIP1, TRIM25, UBC, YOD1]
GO:0001409	Metalloprotease DUBs	REACTOME_Pathways_09.11.2016	0.51	1	0.51	1	[-1]	Group124	43.2432	16	[BABAM1, BRCC3, EP300, FAM175A, HIST1H2AC, HIST1H2AE, HIST1H2AI, HIST1H2AL, HIST2H2AA4, KAT2B, NLRP3, PSMD14, STAM, STAMBPL1, UBC, UIMC1]
GO:0001410	CD22 mediated BCR regulation	REACTOME_Pathways_09.11.2016	0.68	1	0.68	1	[-1]	Group125	60	3	[CD79A, LYN, PTPN6]
GO:0001454	tRNA modification in the mitochondrion	REACTOME_Pathways_09.11.2016	1	1	1	1	[-1]	Group126	42.8571	3	[MTO1, TRMT10C, TRMT61B]
GO:0000110	Mitochondrial protein import	REACTOME_Pathways_09.11.2016	0.37	1	0.37	1	[-1]	Group127	54.8387	34	[ACO2, ATP5A1, ATP5G1, BCS1L, CHCHD2, CHCHD3, CHCHD7, CMC2, COA4, COA6, COX17, COX19, CS, DNAJC19, GRPEL1, HSCB, HSPA9, HSPD1, MTX2, PMPCA, SLC25A12, SLC25A13, SLC25A6, TIMM17A, TIMM17B, TIMM21, TIMM23, TIMM8B, TIMM9, TOMM20, TOMM5, TOMM6, TOMM7, VDAC1]
GO:0001458	rRNA modification in the nucleus and cytosol	REACTOME_Pathways_09.11.2016	0.6	1	0.6	1	[-1]	Group128	45	27	[BMS1, DCAF13, DDX47, DKC1, FBL, FCF1, HEATR1, IMP3, MPHOSPH10, NHP2, NOC4L, NOL6, NOP10, NOP14, NOP58, RPS14, RPS2, RPS6, RPS7, RPS9, SNU13, TBL3, TRMT112, UTP11, UTP18, WDR3, WDR36]
GO:0001465	Choline catabolism	REACTOME_Pathways_09.11.2016	1	1	1	1	[-1]	Group129	50	3	[ALDH7A1, CHDH, SLC44A1]
GO:0001466	Neutrophil degranulation	REACTOME_Pathways_09.11.2016	8e-06	0.0025	8e-06	0.0018	[-1]	Group130	58.8727	282	[A1BG, ACAA1, ACTR2, ADAM10, ADAM8, ADGRE5, AGA, AGL, AGPAT2, ALDH3B1, ALDOA, ALDOC, ALOX5, AMPD3, ANO6, ANPEP, AOC1, AP1M1, APEH, ARG1, ARHGAP9, ARMC8, ARPC5, ARSA, ASAH1, ATAD3B, ATP11A, ATP11B, ATP6AP2, ATP6V0C, ATP6V1D, ATP8B4, BRI3, BST1, BST2, C16orf62, C3, C3AR1, C6orf120, CAB39, CAMP, CAND1, CANT1, CAP1, CAT, CCT2, CD14, CD177, CD33, CD44, CD53, CD55, CD58, CD59, CD63, CD68, CDK13, CEACAM…
GO:0001489	Regulation of TP53 Activity through Acetylation	REACTOME_Pathways_09.11.2016	0.14	1	0.14	1	[-1]	Group131	63.3333	19	[AKT1, AKT2, AKT3, BRD7, EP300, GATAD2B, HDAC1, HDAC2, ING5, MAP2K6, MEAF6, MTA2, PIN1, PIP4K2A, PIP4K2B, PML, RBBP4, RBBP7, TMEM55B]
GO:0001179	TET1,2,3 and TDG demethylate DNA	REACTOME_Pathways_09.11.2016	0.11	1	0.11	1	[-1]	Group132	100	3	[TDG, TET1, TET2]
GO:0001501	RNA polymerase II transcribes snRNA genes	REACTOME_Pathways_09.11.2016	0.0054	1	0.0054	1	[-1]	Group133	65.7143	46	[CCNT1, CDK7, CDK9, CPSF3L, ELL, GTF2A2, GTF2E1, GTF2E2, GTF2F1, GTF2F2, ICE1, INTS10, INTS2, INTS3, INTS4, INTS6, INTS8, INTS9, NABP1, NCBP1, NCBP2, PHAX, POLR2D, POLR2E, POLR2F, POLR2G, POLR2H, POLR2J, POLR2K, POLR2L, POU2F1, POU2F2, RPAP2, RPRD1A, SNAPC1, SNAPC2, SNAPC4, SNAPC5, SP1, SRRT, TAF11, TAF6, TAF8, TAF9, TBP, ZNF143]
GO:0001507	Intra-Golgi traffic	REACTOME_Pathways_09.11.2016	0.22	1	0.22	1	[-1]	Group134	59.0909	26	[BET1L, COG1, COG5, COG6, COG8, CUX1, CYTH1, CYTH2, CYTH3, GOLGA5, GOSR1, GOSR2, MAN1A1, MAN1A2, MAN1C1, MAN2A1, MAN2A2, NAPB, NAPG, NSF, RAB36, RAB41, RIC1, STX16, STX6, TRIP11]
GO:0001508	Retrograde transport at the Trans-Golgi-Network	REACTOME_Pathways_09.11.2016	0.045	1	0.045	1	[-1]	Group135	63.2653	31	[ARFIP2, ARL1, COG1, COG5, COG6, COG8, GCC2, GOLGA4, IGF2R, NAA30, NAA35, NAA38, NAPB, NAPG, NSF, PLIN3, RAB9A, RABEPK, RIC1, SCOC, STX16, STX6, SYS1, TGOLN2, TMF1, USP6NL, VAMP3, VAMP4, VPS51, VPS53, VPS54]
GO:0001180	Miscellaneous transport and binding events	REACTOME_Pathways_09.11.2016	0.12	1	0.12	1	[-1]	Group136	66.6667	14	[ADD2, ADD3, ANKH, AZGP1, CSN1S1, DMTN, MAGT1, MMGT1, MRS2, NIPA1, NIPA2, NIPAL1, NIPAL3, TUSC3]
GO:0000164	Regulation of KIT signaling	REACTOME_Pathways_09.11.2016	0.41	1	0.41	1	[-1]	Group137	61.5385	8	[CBL, KIT, LYN, PRKCA, PTPN6, SH2B2, SOCS1, YES1]
GO:0001577	Galactose catabolism	REACTOME_Pathways_09.11.2016	0.68	1	0.68	1	[-1]	Group138	60	3	[GALT, PGM1, PGM2]
GO:0001579	Urea cycle	REACTOME_Pathways_09.11.2016	0.54	1	0.54	1	[-1]	Group139	60	6	[ARG1, ARG2, ASS1, CPS1, NAGS, SLC25A2]
GO:0001581	Branched-chain amino acid catabolism	REACTOME_Pathways_09.11.2016	0.83	1	0.83	1	[-1]	Group140	52.1739	12	[ACAD8, ACADSB, ACAT1, ALDH6A1, ALDH9A1, AUH, BCAT1, BCKDHB, DBT, HIBCH, MCCC1, TMLHE]
GO:0000790	LRR FLII-interacting protein 1 (LRRFIP1) activates type I IFN production	REACTOME_Pathways_09.11.2016	0.09	1	0.09	1	[-1]	Group141	70.5882	12	[CREBBP, CTBP1, CTBP2, CTNNB1, EP300, HDAC1, LEF1, LRRFIP1, TCF7L2, TLE1, TLE3, TLE4]
GO:0001145	Repression of WNT target genes	REACTOME_Pathways_09.11.2016	0.09	1	0.09	1	[-1]	Group141	70.5882	12	[CREBBP, CTBP1, CTBP2, CTNNB1, EP300, HDAC1, LEF1, LRRFIP1, TCF7L2, TLE1, TLE3, TLE4]
GO:0000168	Beta defensins	REACTOME_Pathways_09.11.2016	1e-05	0.0031	1e-05	0.0023	[-1]	Group142	19.6429	11	[CD4, DEFB1, DEFB104B, DEFB107A, DEFB108B, DEFB123, DEFB124, DEFB128, DEFB130, DEFB136, DEFB4A]
GO:0000169	Defensins	REACTOME_Pathways_09.11.2016	1e-05	0.0031	1e-05	0.0023	[-1]	Group142	19.6429	11	[CD4, DEFB1, DEFB104B, DEFB107A, DEFB108B, DEFB123, DEFB124, DEFB128, DEFB130, DEFB136, DEFB4A]
GO:0001356	MGMT-mediated DNA damage reversal	REACTOME_Pathways_09.11.2016	0.72	1	0.72	1	[-1]	Group143	37.5	3	[ALKBH3, ALKBH5, MGMT]
GO:0001647	DNA Damage Reversal	REACTOME_Pathways_09.11.2016	0.72	1	0.72	1	[-1]	Group143	37.5	3	[ALKBH3, ALKBH5, MGMT]
GO:0000876	CDO in myogenesis	REACTOME_Pathways_09.11.2016	0.19	1	0.19	1	[-1]	Group144	62.069	18	[ABL1, BNIP2, CDC42, CDH2, CDON, CTNNA1, CTNNB1, MAP2K6, MAPK11, MAPK12, MEF2B, MEF2D, MYF5, MYOG, SPAG9, TCF12, TCF3, TCF4]
GO:0001192	Myogenesis	REACTOME_Pathways_09.11.2016	0.19	1	0.19	1	[-1]	Group144	62.069	18	[ABL1, BNIP2, CDC42, CDH2, CDON, CTNNA1, CTNNB1, MAP2K6, MAPK11, MAPK12, MEF2B, MEF2D, MYF5, MYOG, SPAG9, TCF12, TCF3, TCF4]
GO:0000656	Generic Transcription Pathway	REACTOME_Pathways_09.11.2016	1.9e-05	0.0061	1.9e-05	0.0045	[-1]	Group145	53.5308	940	[A1CF, AAAS, ACTB, ADAR, ADARB1, ADAT1, ADAT2, AEBP2, AFF4, AGO1, AGO2, AIFM2, AKT1, AKT2, AKT3, ALKBH8, ALYREF, ANP32A, APEH, APOBEC3B, APOE, AQR, ARID4B, ATM, ATR, AURKB, BANP, BAX, BCAS2, BCL6, BDP1, BID, BMS1, BNIP3L, BRD7, BRF1, BUD31, C14orf166, C1D, C2orf49, CARS2, CASC3, CASP10, CASP2, CASP6, CBX3, CCAR1, CCNC, CCNE2, CCNG1, CCNT1, CD3EAP, CDC5L, CDC73, CDK12, CDK13, CDK7, CDK9, CDKN1B, C…
GO:0001651	Gene Expression	REACTOME_Pathways_09.11.2016	1.9e-05	0.0061	1.9e-05	0.0045	[-1]	Group145	53.5308	940	[A1CF, AAAS, ACTB, ADAR, ADARB1, ADAT1, ADAT2, AEBP2, AFF4, AGO1, AGO2, AIFM2, AKT1, AKT2, AKT3, ALKBH8, ALYREF, ANP32A, APEH, APOBEC3B, APOE, AQR, ARID4B, ATM, ATR, AURKB, BANP, BAX, BCAS2, BCL6, BDP1, BID, BMS1, BNIP3L, BRD7, BRF1, BUD31, C14orf166, C1D, C2orf49, CARS2, CASC3, CASP10, CASP2, CASP6, CBX3, CCAR1, CCNC, CCNE2, CCNG1, CCNT1, CD3EAP, CDC5L, CDC73, CDK12, CDK13, CDK7, CDK9, CDKN1B, C…
GO:0001655	IRS activation	REACTOME_Pathways_09.11.2016	0.1	1	0.1	1	[-1]	Group146	77.7778	7	[GRB10, INS, INSR, IRS1, IRS2, MAPK3, SHC1]
GO:0001656	Signal attenuation	REACTOME_Pathways_09.11.2016	0.1	1	0.1	1	[-1]	Group146	77.7778	7	[GRB10, INS, INSR, IRS1, IRS2, MAPK3, SHC1]
GO:0000789	DEx/H-box helicases activate type I IFN and inflammatory cytokines production	REACTOME_Pathways_09.11.2016	0.65	1	0.65	1	[-1]	Group147	55	11	[AGER, APP, CAPZA2, DHX36, HMGB1, IRF7, LGALS3, MAPK3, RELA, S100A12, SAA1]
GO:0001715	Advanced glycosylation endproduct receptor signaling	REACTOME_Pathways_09.11.2016	0.65	1	0.65	1	[-1]	Group147	55	11	[AGER, APP, CAPZA2, DHX36, HMGB1, IRF7, LGALS3, MAPK3, RELA, S100A12, SAA1]
GO:0001144	Regulation of FZD by ubiquitination	REACTOME_Pathways_09.11.2016	1	1	1	1	[-1]	Group148	47.619	10	[FZD5, FZD6, FZD8, LGR4, RSPO2, RSPO3, UBC, USP8, WNT3A, ZNRF3]
GO:0001203	RNF mutants show enhanced WNT signaling and proliferation	REACTOME_Pathways_09.11.2016	1	1	1	1	[-1]	Group148	47.619	10	[FZD5, FZD6, FZD8, LGR4, RSPO2, RSPO3, UBC, USP8, WNT3A, ZNRF3]
GO:0000088	Oxygen-dependent asparagine hydroxylation of Hypoxia-inducible Factor Alpha	REACTOME_Pathways_09.11.2016	0.11	1	0.11	1	[-1]	Group149	100	3	[EPAS1, HIF1A, HIF1AN]
GO:0001728	PTK6 Expression	REACTOME_Pathways_09.11.2016	0.2	1	0.11	1	[-1]	Group149	80	4	[EPAS1, HIF1A, NR3C1, PELP1]
GO:0001750	Cargo recognition for clathrin-mediated endocytosis	REACTOME_Pathways_09.11.2016	0.31	1	0.14	1	[-1]	Group150	54.0816	53	[AAK1, AGFG1, AP2B1, AP2M1, AP2S1, CBL, CD3D, CD3G, CD4, CLTA, CLTB, COPS2, COPS4, COPS7B, DAB2, EGFR, EPN1, EPN2, EPS15, EPS15L1, FCHO2, GRK2, GRK3, HGS, IGF2R, LDLR, NECAP1, NEDD8, PICALM, REPS1, REPS2, SCARB2, SH3GL1, SH3KBP1, SLC18A3, SNAP91, STAM, STAM2, STON1, STON1-GTF2A1L, SYT1, SYT2, TGOLN2, TOR1A, TOR1B, UBC, UBQLN1, UBQLN2, VAMP2, VAMP3, VAMP4, VAMP7, VAMP8]
GO:0001751	Clathrin-mediated endocytosis	REACTOME_Pathways_09.11.2016	0.14	1	0.14	1	[-1]	Group150	55.0725	76	[AAK1, ACTB, ACTG1, ACTR2, ACTR3, AGFG1, AMPH, AP2B1, AP2M1, AP2S1, ARF6, ARPC2, ARPC5, CBL, CD3D, CD3G, CD4, CLTA, CLTB, COPS2, COPS4, COPS7B, CTTN, DAB2, DNAJC6, DNM1, EGFR, EPN1, EPN2, EPS15, EPS15L1, FCHO2, FNBP1, FNBP1L, GAPVD1, GRK2, GRK3, HGS, HIP1, IGF2R, LDLR, NECAP1, NEDD8, OCRL, PACSIN2, PACSIN3, PICALM, PIK3C2A, RAB5A, REPS1, REPS2, SCARB2, SH3GL1, SH3KBP1, SLC18A3, SNAP91, STAM, STAM…
GO:0001074	Binding of TCF/LEF:CTNNB1 to target gene promoters	REACTOME_Pathways_09.11.2016	1	1	1	1	[-1]	Group151	45.4545	5	[CTNNB1, KDM5B, LEF1, MYC, TCF7L2]
GO:0001766	TFAP2 (AP-2) family regulates transcription of cell cycle factors	REACTOME_Pathways_09.11.2016	1	1	1	1	[-1]	Group151	45.4545	5	[CTNNB1, KDM5B, LEF1, MYC, TCF7L2]
GO:0001452	tRNA processing in the mitochondrion	REACTOME_Pathways_09.11.2016	0.54	1	0.54	1	[-1]	Group152	36.3636	4	[ELAC2, KIAA0391, MTERF4, TRMT10C]
GO:0001767	rRNA processing in the mitochondrion	REACTOME_Pathways_09.11.2016	0.54	1	0.54	1	[-1]	Group152	36.3636	4	[ELAC2, KIAA0391, MTERF4, TRMT10C]
GO:0001794	TRAF3-dependent IRF activation pathway	REACTOME_Pathways_09.11.2016	0.12	1	0.12	1	[-1]	Group153	35.2941	12	[CREBBP, DDX58, DHX36, EP300, IFNA4, IRF7, MAVS, RNF135, SIKE1, TANK, TRAF2, TRIM25]
GO:0001796	TRAF6 mediated IRF7 activation	REACTOME_Pathways_09.11.2016	0.12	1	0.12	1	[-1]	Group153	35.2941	12	[CREBBP, DDX58, DHX36, EP300, IFNA4, IRF7, MAVS, RNF135, SIKE1, TANK, TRAF2, TRIM25]
GO:0001809	N-glycan trimming and elongation in the cis-Golgi	REACTOME_Pathways_09.11.2016	0.027	1	0.027	1	[-1]	Group154	100	5	[MAN1A1, MAN1A2, MAN1C1, MANEA, MGAT1]
GO:0001810	Progressive trimming of alpha-1,2-linked mannose residues from Man9/8/7GlcNAc2 to produce Man5GlcNAc2	REACTOME_Pathways_09.11.2016	0.027	1	0.027	1	[-1]	Group154	100	5	[MAN1A1, MAN1A2, MAN1C1, MANEA, MGAT1]
GO:0001578	Amino acid synthesis and interconversion (transamination)	REACTOME_Pathways_09.11.2016	1	1	1	1	[-1]	Group155	50	14	[ASPG, GLS, GLUD1, GLUD2, GLUL, GOT2, KYAT1, OAT, PSPH, PYCR1, PYCR2, PYCRL, SERINC1, SERINC3]
GO:0001828	Serine biosynthesis	REACTOME_Pathways_09.11.2016	1	1	1	1	[-1]	Group155	50	14	[ASPG, GLS, GLUD1, GLUD2, GLUL, GOT2, KYAT1, OAT, PSPH, PYCR1, PYCR2, PYCRL, SERINC1, SERINC3]
GO:0001817	Ligand-gated ion channel transport	REACTOME_Pathways_09.11.2016	0.0096	1	0.0096	1	[-1]	Group156	23.0769	6	[ARHGEF9, GABRB1, GABRB2, GABRB3, GABRQ, GLRA4]
GO:0001829	GABA A receptor activation	REACTOME_Pathways_09.11.2016	0.58	1	0.0096	1	[-1]	Group156	38.4615	5	[ARHGEF9, GABRB1, GABRB2, GABRB3, GABRQ]
GO:0000754	Stimuli-sensing channels	REACTOME_Pathways_09.11.2016	0.16	1	0.16	1	[-1]	Group157	44.0758	93	[ANO1, ANO10, ANO6, ANO9, ARHGEF9, ASIC4, ASPH, ATP10A, ATP11A, ATP11B, ATP11C, ATP12A, ATP13A2, ATP1A1, ATP1A4, ATP1B1, ATP1B2, ATP1B3, ATP2A1, ATP2A2, ATP2B4, ATP2C1, ATP2C2, ATP6AP1, ATP6V0C, ATP6V0E1, ATP6V1A, ATP6V1B2, ATP6V1C1, ATP6V1C2, ATP6V1D, ATP6V1E2, ATP6V1G1, ATP6V1H, ATP7A, ATP8B1, ATP8B2, ATP8B4, ATP9A, ATP9B, BEST1, BEST3, BEST4, CALM1, CALM2, CALM3, CAMK2A, CAMK2G, CLCN3, CLCN4, …
GO:0001842	Ion channel transport	REACTOME_Pathways_09.11.2016	0.16	1	0.16	1	[-1]	Group157	44.0758	93	[ANO1, ANO10, ANO6, ANO9, ARHGEF9, ASIC4, ASPH, ATP10A, ATP11A, ATP11B, ATP11C, ATP12A, ATP13A2, ATP1A1, ATP1A4, ATP1B1, ATP1B2, ATP1B3, ATP2A1, ATP2A2, ATP2B4, ATP2C1, ATP2C2, ATP6AP1, ATP6V0C, ATP6V0E1, ATP6V1A, ATP6V1B2, ATP6V1C1, ATP6V1C2, ATP6V1D, ATP6V1E2, ATP6V1G1, ATP6V1H, ATP7A, ATP8B1, ATP8B2, ATP8B4, ATP9A, ATP9B, BEST1, BEST3, BEST4, CALM1, CALM2, CALM3, CAMK2A, CAMK2G, CLCN3, CLCN4, …
GO:0000096	Endosomal/Vacuolar pathway	REACTOME_Pathways_09.11.2016	0.64	1	0.64	1	[-1]	Group158	53.4884	23	[COL18A1, CTRB2, CTSG, CTSK, CTSL, ELANE, HLA-A, HLA-B, HLA-C, HLA-E, HLA-F, KLK2, KLKB1, MMP1, MMP13, MMP15, MMP17, MMP2, MMP25, PRSS1, SPOCK3, TIMP2, TPSAB1]
GO:0000229	Activation of Matrix Metalloproteinases	REACTOME_Pathways_09.11.2016	0.64	1	0.64	1	[-1]	Group158	53.4884	23	[COL18A1, CTRB2, CTSG, CTSK, CTSL, ELANE, HLA-A, HLA-B, HLA-C, HLA-E, HLA-F, KLK2, KLKB1, MMP1, MMP13, MMP15, MMP17, MMP2, MMP25, PRSS1, SPOCK3, TIMP2, TPSAB1]
GO:0000291	PDE3B signalling	REACTOME_Pathways_09.11.2016	0.36	1	0.36	1	[-1]	Group159	75	3	[AKT2, PDE3B, TSC1]
GO:0000292	Inhibition of TSC complex formation by PKB	REACTOME_Pathways_09.11.2016	0.36	1	0.36	1	[-1]	Group159	75	3	[AKT2, PDE3B, TSC1]
GO:0000274	Gamma carboxylation, hypusine formation and arylsulfatase activation	REACTOME_Pathways_09.11.2016	1	1	1	1	[-1]	Group160	48.7179	19	[ARSA, ARSD, ARSF, ARSG, ARSJ, ARSK, BGLAP, DNAJC24, DPH3, DPH5, EEF2, EIF5A2, F7, FN3KRP, GAS6, GGCX, ICMT, SUMF1, SUMF2]
GO:0000307	The activation of arylsulfatases	REACTOME_Pathways_09.11.2016	0.41	1	1	1	[-1]	Group160	61.5385	8	[ARSA, ARSD, ARSF, ARSG, ARSJ, ARSK, SUMF1, SUMF2]
GO:0000211	Glutathione conjugation	REACTOME_Pathways_09.11.2016	0.4	1	0.4	1	[-1]	Group161	41.6667	15	[AKR1A1, GCLM, GGCT, GGT1, GGT7, GSTA4, GSTK1, GSTM3, GSTM5, GSTO1, GSTP1, GSTT1, GSTT2, GSTT2B, MGST3]
GO:0000391	Glutathione synthesis and recycling	REACTOME_Pathways_09.11.2016	0.4	1	0.4	1	[-1]	Group161	41.6667	15	[AKR1A1, GCLM, GGCT, GGT1, GGT7, GSTA4, GSTK1, GSTM3, GSTM5, GSTO1, GSTP1, GSTT1, GSTT2, GSTT2B, MGST3]
GO:0000446	Signaling by activated point mutants of FGFR1	REACTOME_Pathways_09.11.2016	1	1	1	1	[-1]	Group162	44.4444	4	[ANOS1, FGF1, FGF2, FGFR1]
GO:0000480	FGFR1c ligand binding and activation	REACTOME_Pathways_09.11.2016	1	1	1	1	[-1]	Group162	44.4444	4	[ANOS1, FGF1, FGF2, FGFR1]
GO:0000047	Electric Transmission Across Gap Junctions	REACTOME_Pathways_09.11.2016	0.2	1	0.2	1	[-1]	Group163	80	4	[GJC1, GJD2, PANX1, PANX2]
GO:0000048	Transmission across Electrical Synapses	REACTOME_Pathways_09.11.2016	0.2	1	0.2	1	[-1]	Group163	80	4	[GJC1, GJD2, PANX1, PANX2]
GO:0000528	VEGF binds to VEGFR leading to receptor dimerization	REACTOME_Pathways_09.11.2016	0.49	1	0.49	1	[-1]	Group164	62.5	5	[FLT4, PGF, VEGFA, VEGFB, VEGFC]
GO:0000541	Nicotinate metabolism	REACTOME_Pathways_09.11.2016	1	1	1	1	[-1]	Group165	50	7	[NADSYN1, NAMPT, NAXD, NAXE, NUDT12, PTGIS, PTGS2]
GO:0000548	Nicotinamide salvaging	REACTOME_Pathways_09.11.2016	0.17	1	1	1	[-1]	Group165	75	6	[NAMPT, NAXD, NAXE, NUDT12, PTGIS, PTGS2]
GO:0000539	Coenzyme A biosynthesis	REACTOME_Pathways_09.11.2016	1	1	1	1	[-1]	Group166	50	6	[AASDHPPT, PANK3, PDZD11, PPCS, SLC25A16, SLC5A6]
GO:0000562	Vitamin B5 (pantothenate) metabolism	REACTOME_Pathways_09.11.2016	1	1	1	1	[-1]	Group166	50	6	[AASDHPPT, PANK3, PDZD11, PPCS, SLC25A16, SLC5A6]
GO:0000645	Aromatic amines can be N-hydroxylated or N-dealkylated by CYP1A2	REACTOME_Pathways_09.11.2016	0.6	1	0.6	1	[-1]	Group167	57.1429	8	[COMT, GSTO1, MAT2A, MAT2B, N6AMT1, NNMT, TPMT, TRMT112]
GO:0000212	Elastic fibre formation	REACTOME_Pathways_09.11.2016	0.023	1	0.023	1	[-1]	Group168	66.6667	30	[BMP2, BMP4, EFEMP1, EFEMP2, EMILIN1, EMILIN2, EMILIN3, FBLN2, FBN1, FN1, ITGA5, ITGAV, ITGB1, ITGB5, ITGB8, LOX, LOXL1, LOXL2, LOXL3, LOXL4, LTBP1, LTBP2, LTBP4, MFAP1, MFAP2, MFAP3, MFAP4, TGFB1, TGFB3, VTN]
GO:0000659	Molecules associated with elastic fibres	REACTOME_Pathways_09.11.2016	0.023	1	0.023	1	[-1]	Group168	66.6667	30	[BMP2, BMP4, EFEMP1, EFEMP2, EMILIN1, EMILIN2, EMILIN3, FBLN2, FBN1, FN1, ITGA5, ITGAV, ITGB1, ITGB5, ITGB8, LOX, LOXL1, LOXL2, LOXL3, LOXL4, LTBP1, LTBP2, LTBP4, MFAP1, MFAP2, MFAP3, MFAP4, TGFB1, TGFB3, VTN]
GO:0000267	AMPK inhibits chREBP transcriptional activation activity	REACTOME_Pathways_09.11.2016	0.071	1	0.071	1	[-1]	Group169	73.3333	11	[ADIPOR1, MAPK11, MAPK12, MLXIPL, PPARGC1A, PRKAA2, PRKAB2, PRKAG1, PRKAG2, PRKAG3, STK11]
GO:0000674	Activation of PPARGC1A (PGC-1alpha) by phosphorylation	REACTOME_Pathways_09.11.2016	0.071	1	0.071	1	[-1]	Group169	73.3333	11	[ADIPOR1, MAPK11, MAPK12, MLXIPL, PPARGC1A, PRKAA2, PRKAB2, PRKAG1, PRKAG2, PRKAG3, STK11]
GO:0000024	Activation and oligomerization of BAK protein	REACTOME_Pathways_09.11.2016	0.11	1	0.11	1	[-1]	Group170	100	3	[BAK1, BAX, BID]
GO:0000066	Activation, translocation and oligomerization of BAX	REACTOME_Pathways_09.11.2016	0.11	1	0.11	1	[-1]	Group170	100	3	[BAK1, BAX, BID]
GO:0000695	Anchoring fibril formation	REACTOME_Pathways_09.11.2016	0.82	1	0.82	1	[-1]	Group171	52.381	11	[COL1A1, COL1A2, COL7A1, LAMB3, LOX, LOXL1, LOXL2, LOXL3, LOXL4, PCOLCE, TLL1]
GO:0000698	Crosslinking of collagen fibrils	REACTOME_Pathways_09.11.2016	0.82	1	0.82	1	[-1]	Group171	52.381	11	[COL1A1, COL1A2, COL7A1, LAMB3, LOX, LOXL1, LOXL2, LOXL3, LOXL4, PCOLCE, TLL1]
GO:0000142	Mitochondrial ABC transporters	REACTOME_Pathways_09.11.2016	0.8	1	0.8	1	[-1]	Group172	43.75	7	[ABCB10, ABCB7, ABCB8, ERCC2, FAM96B, MMS19, NDOR1]
GO:0000143	ABC transporters in lipid homeostasis	REACTOME_Pathways_09.11.2016	0.38	1	0.38	1	[-1]	Group173	38.0952	8	[ABCA2, ABCA9, ABCD1, ABCG1, APOA1, PEX19, PEX3, SAA1]
GO:0000780	Scavenging by Class B Receptors	REACTOME_Pathways_09.11.2016	0.38	1	0.38	1	[-1]	Group173	38.0952	8	[ABCA2, ABCA9, ABCD1, ABCG1, APOA1, PEX19, PEX3, SAA1]
GO:0000848	GRB2:SOS provides linkage to MAPK signaling for Integrins	REACTOME_Pathways_09.11.2016	0.44	1	0.44	1	[-1]	Group174	60	9	[APBB1IP, BCAR1, FN1, ITGA2B, PTK2, RAP1A, RAP1B, TLN1, VWF]
GO:0000867	p130Cas linkage to MAPK signaling for integrins	REACTOME_Pathways_09.11.2016	0.44	1	0.44	1	[-1]	Group174	60	9	[APBB1IP, BCAR1, FN1, ITGA2B, PTK2, RAP1A, RAP1B, TLN1, VWF]
GO:0000374	p38MAPK events	REACTOME_Pathways_09.11.2016	0.49	1	0.49	1	[-1]	Group175	57.8947	11	[DSCAM, DSCAML1, KRAS, MAPK11, MAPK12, MAPK8, MAPKAPK2, NRAS, NTN1, PAK1, RAC1]
GO:0000880	DSCAM interactions	REACTOME_Pathways_09.11.2016	0.49	1	0.49	1	[-1]	Group175	57.8947	11	[DSCAM, DSCAML1, KRAS, MAPK11, MAPK12, MAPK8, MAPKAPK2, NRAS, NTN1, PAK1, RAC1]
GO:0000597	YAP1- and WWTR1 (TAZ)-stimulated gene expression	REACTOME_Pathways_09.11.2016	0.093	1	0.11	1	[-1]	Group176	65.5172	19	[CHD9, CREBBP, GATA4, HELZ2, HIPK1, HIPK2, KAT2B, NCOA2, NKX2-5, RUNX2, SMARCD3, TBL1X, TBL1XR1, TBX5, TEAD3, TEAD4, TGS1, WWTR1, YAP1]
GO:0001248	Physiological factors	REACTOME_Pathways_09.11.2016	0.085	1	0.11	1	[-1]	Group176	75	9	[GATA4, HIPK1, HIPK2, KAT2B, NKX2-5, NPR1, NPR2, TBX5, WWTR1]
GO:0000933	Beta-oxidation of pristanoyl-CoA	REACTOME_Pathways_09.11.2016	0.84	1	0.84	1	[-1]	Group177	52	13	[ABCD1, ACAA1, ACBD5, ACOT8, AGPS, CRAT, GNPAT, HACL1, HSD17B4, IDH1, NUDT7, PHYH, SLC25A17]
GO:0000950	Peroxisomal lipid metabolism	REACTOME_Pathways_09.11.2016	0.84	1	0.84	1	[-1]	Group177	52	13	[ABCD1, ACAA1, ACBD5, ACOT8, AGPS, CRAT, GNPAT, HACL1, HSD17B4, IDH1, NUDT7, PHYH, SLC25A17]
GO:0000074	Activation of RAS in B cells	REACTOME_Pathways_09.11.2016	0.25	1	0.25	1	[-1]	Group178	63.1579	12	[KRAS, NRAS, PRKACA, PRKACB, RAP1A, RAP1B, RAP1GAP, RAP1GAP2, RAPGEF4, RASGRP2, YWHAB, YWHAZ]
GO:0000961	Rap1 signalling	REACTOME_Pathways_09.11.2016	0.25	1	0.25	1	[-1]	Group178	63.1579	12	[KRAS, NRAS, PRKACA, PRKACB, RAP1A, RAP1B, RAP1GAP, RAP1GAP2, RAPGEF4, RASGRP2, YWHAB, YWHAZ]
GO:0000993	P2Y receptors	REACTOME_Pathways_09.11.2016	0.21	1	0.21	1	[-1]	Group179	31.25	5	[ADORA2B, GPR17, P2RY2, P2RY4, P2RY6]
GO:0000995	Nucleotide-like (purinergic) receptors	REACTOME_Pathways_09.11.2016	0.21	1	0.21	1	[-1]	Group179	31.25	5	[ADORA2B, GPR17, P2RY2, P2RY4, P2RY6]
GO:0000761	FCERI mediated Ca+2 mobilization	REACTOME_Pathways_09.11.2016	0.46	1	0.46	1	[-1]	Group180	56.6667	17	[AHCYL1, BTK, CALM1, CALM2, CALM3, FCER1A, FCER1G, ITPR1, ITPR2, ITPR3, LYN, NFATC1, NFATC2, PPP3CA, PPP3CB, VAV1, VAV2]
GO:0001267	CLEC7A (Dectin-1) induces NFAT activation	REACTOME_Pathways_09.11.2016	0.46	1	0.46	1	[-1]	Group180	56.6667	17	[AHCYL1, BTK, CALM1, CALM2, CALM3, FCER1A, FCER1G, ITPR1, ITPR2, ITPR3, LYN, NFATC1, NFATC2, PPP3CA, PPP3CB, VAV1, VAV2]
GO:0001033	Small interfering RNA (siRNA) biogenesis	REACTOME_Pathways_09.11.2016	0.33	1	0.57	1	[-1]	Group181	66.6667	6	[AGO1, AGO2, DICER1, PRKRA, TSN, TSNAX]
GO:0001034	Post-transcriptional silencing by small RNAs	REACTOME_Pathways_09.11.2016	1	1	0.57	1	[-1]	Group181	42.8571	3	[AGO1, AGO2, TNRC6C]
GO:0000543	Vitamin C (ascorbate) metabolism	REACTOME_Pathways_09.11.2016	1	1	0.26	1	[-1]	Group182	50	4	[CYB5R3, GSTO1, SLC2A1, SLC2A3]
GO:0001050	Facilitative Na+-independent glucose transporters	REACTOME_Pathways_09.11.2016	0.42	1	0.26	1	[-1]	Group182	35.7143	5	[SLC2A1, SLC2A12, SLC2A14, SLC2A3, SLC2A5]
GO:0000632	Basigin interactions	REACTOME_Pathways_09.11.2016	0.84	1	0.84	1	[-1]	Group183	51.8519	14	[ATP1B1, ATP1B2, ATP1B3, BSG, CAV1, ITGA6, ITGB1, MMP1, PPIA, PPIL2, SLC16A1, SLC16A3, SLC7A10, SLC7A5]
GO:0001067	Proton-coupled monocarboxylate transport	REACTOME_Pathways_09.11.2016	0.84	1	0.84	1	[-1]	Group183	51.8519	14	[ATP1B1, ATP1B2, ATP1B3, BSG, CAV1, ITGA6, ITGB1, MMP1, PPIA, PPIL2, SLC16A1, SLC16A3, SLC7A10, SLC7A5]
GO:0000750	Insulin processing	REACTOME_Pathways_09.11.2016	1	1	1	1	[-1]	Group184	48.7805	20	[ARF4, ASAP1, CNGA2, CNGA4, CNGB1, ERO1A, ERO1B, EXOC7, INS, KIF5B, KIF5C, PKD1, PKD2, RAB11A, RAB11FIP3, SLC30A5, SLC30A6, SLC30A7, STX1A, VAMP2]
GO:0001285	VxPx cargo-targeting to cilium	REACTOME_Pathways_09.11.2016	1	1	1	1	[-1]	Group184	48.7805	20	[ARF4, ASAP1, CNGA2, CNGA4, CNGB1, ERO1A, ERO1B, EXOC7, INS, KIF5B, KIF5C, PKD1, PKD2, RAB11A, RAB11FIP3, SLC30A5, SLC30A6, SLC30A7, STX1A, VAMP2]
GO:0000966	Ephrin signaling	REACTOME_Pathways_09.11.2016	0.83	1	0.83	1	[-1]	Group185	45.8333	11	[ANK1, ARHGEF7, DCX, EPHB2, MYL12A, NCK2, NFASC, PAK1, PAK2, RAC1, SDCBP]
GO:0001111	Neurofascin interactions	REACTOME_Pathways_09.11.2016	0.83	1	0.83	1	[-1]	Group185	45.8333	11	[ANK1, ARHGEF7, DCX, EPHB2, MYL12A, NCK2, NFASC, PAK1, PAK2, RAC1, SDCBP]
GO:0000594	FCGR activation	REACTOME_Pathways_09.11.2016	1	1	1	1	[-1]	Group186	47.0588	8	[CD3G, FCER1G, FCGR2A, FCGR3A, FGR, HCK, LYN, YES1]
GO:0001289	Dectin-2 family	REACTOME_Pathways_09.11.2016	1	1	1	1	[-1]	Group186	47.0588	8	[CD3G, FCER1G, FCGR2A, FCGR3A, FGR, HCK, LYN, YES1]
GO:0000510	Ceramide signalling	REACTOME_Pathways_09.11.2016	0.72	1	0.72	1	[-1]	Group187	37.5	3	[NSMAF, RACK1, TNF]
GO:0001299	TNFR1-mediated ceramide production	REACTOME_Pathways_09.11.2016	0.72	1	0.72	1	[-1]	Group187	37.5	3	[NSMAF, RACK1, TNF]
GO:0001360	Response to metal ions	REACTOME_Pathways_09.11.2016	0.034	1	0.034	1	[-1]	Group188	81.8182	9	[MT1A, MT1B, MT1E, MT1F, MT1G, MT1H, MT1M, MT1X, MT2A]
GO:0001362	Metallothioneins bind metals	REACTOME_Pathways_09.11.2016	0.034	1	0.034	1	[-1]	Group188	81.8182	9	[MT1A, MT1B, MT1E, MT1F, MT1G, MT1H, MT1M, MT1X, MT2A]
GO:0000093	Cross-presentation of particulate exogenous antigens (phagosomes)	REACTOME_Pathways_09.11.2016	0.62	1	0.62	1	[-1]	Group189	56.25	9	[ITGAV, ITGB5, NCF1, NCF2, NOX1, PIK3C3, PIK3R4, RAC1, RAC2]
GO:0001372	RHO GTPases Activate NADPH Oxidases	REACTOME_Pathways_09.11.2016	0.62	1	0.62	1	[-1]	Group189	56.25	9	[ITGAV, ITGB5, NCF1, NCF2, NOX1, PIK3C3, PIK3R4, RAC1, RAC2]
GO:0000592	Signaling by Hippo	REACTOME_Pathways_09.11.2016	0.22	1	0.22	1	[-1]	Group190	60.6061	20	[AP2B1, AP2M1, AP2S1, CASP3, CLTA, CLTB, MOB1A, MOB1B, NPHP4, PRKCA, PRKCB, PRKCG, STK3, STK4, TJP1, TJP2, WWTR1, YAP1, YWHAB, YWHAE]
GO:0001166	WNT5A-dependent internalization of FZD4	REACTOME_Pathways_09.11.2016	0.22	1	0.22	1	[-1]	Group190	60.6061	20	[AP2B1, AP2M1, AP2S1, CASP3, CLTA, CLTB, MOB1A, MOB1B, NPHP4, PRKCA, PRKCB, PRKCG, STK3, STK4, TJP1, TJP2, WWTR1, YAP1, YWHAB, YWHAE]
GO:0000606	COPII (Coat Protein 2) Mediated Vesicle Transport	REACTOME_Pathways_09.11.2016	0.02	1	0.011	1	[-1]	Group191	63.2353	43	[ANKRD28, AREG, BET1, CD59, CNIH1, CNIH2, CNIH3, COL7A1, CTSC, CTSZ, F5, FOLR1, GOLGA2, GOSR2, GRIA1, LMAN1, LMAN1L, NAPB, NAPG, NSF, PPP6C, PPP6R3, RAB1A, RAB1B, SAR1B, SCFD1, SEC13, SEC16A, SEC16B, SEC23A, SEC23IP, SEC24A, SEC24B, SEC24D, SEC31A, TBC1D20, TMED10, TMED2, TRAPPC1, TRAPPC10, TRAPPC2, TRAPPC4, USO1]
GO:0001424	Cargo concentration in the ER	REACTOME_Pathways_09.11.2016	0.022	1	0.011	1	[-1]	Group191	69.697	23	[AREG, CD59, CNIH1, CNIH2, CNIH3, COL7A1, CTSC, CTSZ, F5, FOLR1, GOSR2, GRIA1, LMAN1, LMAN1L, MIA2, MIA3, SAR1B, SEC23A, SEC24A, SEC24B, SEC24D, TMED10, TMED2]
GO:0001317	Fructose metabolism	REACTOME_Pathways_09.11.2016	0.27	1	0.27	1	[-1]	Group192	71.4286	5	[AKR1B1, ALDH1A1, ALDOB, SORD, TKFC]
GO:0001576	Fructose catabolism	REACTOME_Pathways_09.11.2016	0.27	1	0.27	1	[-1]	Group192	71.4286	5	[AKR1B1, ALDH1A1, ALDOB, SORD, TKFC]
GO:0001446	tRNA modification in the nucleus and cytosol	REACTOME_Pathways_09.11.2016	0.021	1	0.021	1	[-1]	Group193	60.396	61	[AAAS, ADAT1, ADAT2, ALKBH8, C14orf166, C2orf49, CPSF1, CPSF4, CTU1, DDX1, ELAC2, EPRS, FTSJ1, KIAA0391, LCMT2, METTL1, MTO1, NDC1, NSUN2, NUP107, NUP133, NUP153, NUP155, NUP160, NUP205, NUP214, NUP35, NUP37, NUP43, NUP54, NUP62, NUP85, NUP93, NUPL2, POP1, POP5, POP7, PUS7, QTRT2, RAE1, RAN, RANBP2, RPP14, RPP25, RPP30, RTCB, THG1L, TPRKB, TRDMT1, TRMT10A, TRMT10C, TRMT11, TRMT112, TRMT13, TRMT44…
GO:0001447	Synthesis of wybutosine at G37 of tRNA(Phe)	REACTOME_Pathways_09.11.2016	0.021	1	0.021	1	[-1]	Group193	60.396	61	[AAAS, ADAT1, ADAT2, ALKBH8, C14orf166, C2orf49, CPSF1, CPSF4, CTU1, DDX1, ELAC2, EPRS, FTSJ1, KIAA0391, LCMT2, METTL1, MTO1, NDC1, NSUN2, NUP107, NUP133, NUP153, NUP155, NUP160, NUP205, NUP214, NUP35, NUP37, NUP43, NUP54, NUP62, NUP85, NUP93, NUPL2, POP1, POP5, POP7, PUS7, QTRT2, RAE1, RAN, RANBP2, RPP14, RPP25, RPP30, RTCB, THG1L, TPRKB, TRDMT1, TRMT10A, TRMT10C, TRMT11, TRMT112, TRMT13, TRMT44…
GO:0001604	tRNA processing	REACTOME_Pathways_09.11.2016	0.021	1	0.021	1	[-1]	Group193	60.396	61	[AAAS, ADAT1, ADAT2, ALKBH8, C14orf166, C2orf49, CPSF1, CPSF4, CTU1, DDX1, ELAC2, EPRS, FTSJ1, KIAA0391, LCMT2, METTL1, MTO1, NDC1, NSUN2, NUP107, NUP133, NUP153, NUP155, NUP160, NUP205, NUP214, NUP35, NUP37, NUP43, NUP54, NUP62, NUP85, NUP93, NUPL2, POP1, POP5, POP7, PUS7, QTRT2, RAE1, RAN, RANBP2, RPP14, RPP25, RPP30, RTCB, THG1L, TPRKB, TRDMT1, TRMT10A, TRMT10C, TRMT11, TRMT112, TRMT13, TRMT44…
GO:0000079	Fertilization	REACTOME_Pathways_09.11.2016	0.00056	0.17	0.00056	0.12	[-1]	Group194	15.3846	4	[ACR, CATSPERD, CD9, IZUMO4]
GO:0000131	Sperm Motility And Taxes	REACTOME_Pathways_09.11.2016	0.00056	0.17	0.00056	0.12	[-1]	Group194	15.3846	4	[ACR, CATSPERD, CD9, IZUMO4]
GO:0000172	Reproduction	REACTOME_Pathways_09.11.2016	0.00056	0.17	0.00056	0.12	[-1]	Group194	15.3846	4	[ACR, CATSPERD, CD9, IZUMO4]
GO:0001601	mRNA Editing: C to U Conversion	REACTOME_Pathways_09.11.2016	0.54	1	0.54	1	[-1]	Group195	36.3636	4	[A1CF, ADAR, ADARB1, APOBEC3B]
GO:0001663	mRNA Editing	REACTOME_Pathways_09.11.2016	0.54	1	0.54	1	[-1]	Group195	36.3636	4	[A1CF, ADAR, ADARB1, APOBEC3B]
GO:0001664	Formation of the Editosome	REACTOME_Pathways_09.11.2016	0.54	1	0.54	1	[-1]	Group195	36.3636	4	[A1CF, ADAR, ADARB1, APOBEC3B]
GO:0001652	Ketone body metabolism	REACTOME_Pathways_09.11.2016	0.74	1	0.74	1	[-1]	Group196	55.5556	5	[AACS, ACAT1, ACSS3, HMGCL, OXCT1]
GO:0001691	Utilization of Ketone Bodies	REACTOME_Pathways_09.11.2016	0.74	1	0.74	1	[-1]	Group196	55.5556	5	[AACS, ACAT1, ACSS3, HMGCL, OXCT1]
GO:0001692	Synthesis of Ketone Bodies	REACTOME_Pathways_09.11.2016	0.74	1	0.74	1	[-1]	Group196	55.5556	5	[AACS, ACAT1, ACSS3, HMGCL, OXCT1]
GO:0000098	Erythrocytes take up carbon dioxide and release oxygen	REACTOME_Pathways_09.11.2016	1	1	1	1	[-1]	Group197	46.1538	6	[AQP1, CYB5R2, CYB5R4, CYB5RL, HBB, SLC4A1]
GO:0000100	Erythrocytes take up oxygen and release carbon dioxide	REACTOME_Pathways_09.11.2016	1	1	1	1	[-1]	Group197	46.1538	6	[AQP1, CYB5R2, CYB5R4, CYB5RL, HBB, SLC4A1]
GO:0000177	O2/CO2 exchange in erythrocytes	REACTOME_Pathways_09.11.2016	1	1	1	1	[-1]	Group197	46.1538	6	[AQP1, CYB5R2, CYB5R4, CYB5RL, HBB, SLC4A1]
GO:0001026	Transport of vitamins, nucleosides, and related molecules	REACTOME_Pathways_09.11.2016	0.87	1	0.87	1	[-1]	Group198	47.3684	18	[ALB, APOD, LCN9, PDZD11, SLC16A2, SLC27A1, SLC27A4, SLC29A1, SLC33A1, SLC35A1, SLC35A2, SLC35A3, SLC35B2, SLC35B4, SLC35C1, SLC35D2, SLC5A6, SLCO2A1]
GO:0001617	Transport of nucleotide sugars	REACTOME_Pathways_09.11.2016	0.1	1	0.87	1	[-1]	Group198	77.7778	7	[SLC35A1, SLC35A2, SLC35A3, SLC35B2, SLC35B4, SLC35C1, SLC35D2]
GO:0001708	Transport of nucleosides and free purine and pyrimidine bases across the plasma membrane	REACTOME_Pathways_09.11.2016	0.87	1	0.87	1	[-1]	Group198	47.3684	18	[ALB, APOD, LCN9, PDZD11, SLC16A2, SLC27A1, SLC27A4, SLC29A1, SLC33A1, SLC35A1, SLC35A2, SLC35A3, SLC35B2, SLC35B4, SLC35C1, SLC35D2, SLC5A6, SLCO2A1]
GO:0001195	N-glycan trimming in the ER and Calnexin/Calreticulin cycle	REACTOME_Pathways_09.11.2016	0.12	1	0.12	1	[-1]	Group199	62.8571	22	[AMFR, CALR, CANX, DERL1, DERL2, ENGASE, GANAB, MOGS, NGLY1, OS9, PDIA3, PSMC1, RAD23B, RNF103, RNF139, RNF5, SEL1L, SYVN1, TRIM13, UBC, UBXN1, UGGT2]
GO:0001781	ER Quality Control Compartment (ERQC)	REACTOME_Pathways_09.11.2016	0.12	1	0.12	1	[-1]	Group199	62.8571	22	[AMFR, CALR, CANX, DERL1, DERL2, ENGASE, GANAB, MOGS, NGLY1, OS9, PDIA3, PSMC1, RAD23B, RNF103, RNF139, RNF5, SEL1L, SYVN1, TRIM13, UBC, UBXN1, UGGT2]
GO:0001782	Calnexin/calreticulin cycle	REACTOME_Pathways_09.11.2016	0.12	1	0.12	1	[-1]	Group199	62.8571	22	[AMFR, CALR, CANX, DERL1, DERL2, ENGASE, GANAB, MOGS, NGLY1, OS9, PDIA3, PSMC1, RAD23B, RNF103, RNF139, RNF5, SEL1L, SYVN1, TRIM13, UBC, UBXN1, UGGT2]
GO:0000272	Keratan sulfate/keratin metabolism	REACTOME_Pathways_09.11.2016	0.33	1	0.33	1	[-1]	Group200	54.5455	48	[B3GNT2, B3GNT5, B3GNT7, B3GNT8, B3GNT9, B4GALT2, B4GALT3, B4GALT6, C1GALT1, C1GALT1C1, CHST1, CHST2, CHST6, FMOD, GALNT1, GALNT10, GALNT11, GALNT12, GALNT15, GALNT16, GALNT18, GALNT2, GALNT3, GALNT4, GALNT5, GALNT7, GLB1, GLB1L, GNS, HEXA, LUM, MUC1, MUC12, MUC17, MUC2, MUC4, MUC5AC, MUC6, OGN, OMD, PRELP, SLC35D2, ST3GAL1, ST3GAL2, ST6GAL1, ST6GALNAC2, ST6GALNAC4, WBSCR17]
GO:0000577	Keratan sulfate biosynthesis	REACTOME_Pathways_09.11.2016	0.33	1	0.33	1	[-1]	Group200	54.5455	48	[B3GNT2, B3GNT5, B3GNT7, B3GNT8, B3GNT9, B4GALT2, B4GALT3, B4GALT6, C1GALT1, C1GALT1C1, CHST1, CHST2, CHST6, FMOD, GALNT1, GALNT10, GALNT11, GALNT12, GALNT15, GALNT16, GALNT18, GALNT2, GALNT3, GALNT4, GALNT5, GALNT7, GLB1, GLB1L, GNS, HEXA, LUM, MUC1, MUC12, MUC17, MUC2, MUC4, MUC5AC, MUC6, OGN, OMD, PRELP, SLC35D2, ST3GAL1, ST3GAL2, ST6GAL1, ST6GALNAC2, ST6GALNAC4, WBSCR17]
GO:0001789	O-linked glycosylation of mucins	REACTOME_Pathways_09.11.2016	0.33	1	0.33	1	[-1]	Group200	54.5455	48	[B3GNT2, B3GNT5, B3GNT7, B3GNT8, B3GNT9, B4GALT2, B4GALT3, B4GALT6, C1GALT1, C1GALT1C1, CHST1, CHST2, CHST6, FMOD, GALNT1, GALNT10, GALNT11, GALNT12, GALNT15, GALNT16, GALNT18, GALNT2, GALNT3, GALNT4, GALNT5, GALNT7, GLB1, GLB1L, GNS, HEXA, LUM, MUC1, MUC12, MUC17, MUC2, MUC4, MUC5AC, MUC6, OGN, OMD, PRELP, SLC35D2, ST3GAL1, ST3GAL2, ST6GAL1, ST6GALNAC2, ST6GALNAC4, WBSCR17]
GO:0001819	N-glycan antennae elongation in the medial/trans-Golgi	REACTOME_Pathways_09.11.2016	0.84	1	0.84	1	[-1]	Group201	46.1538	12	[B4GALT2, B4GALT3, B4GALT6, CHST10, FUT8, LHB, MAN2A1, MAN2A2, MGAT2, MGAT3, MGAT5, ST6GAL1]
GO:0001820	N-Glycan antennae elongation	REACTOME_Pathways_09.11.2016	0.84	1	0.84	1	[-1]	Group201	46.1538	12	[B4GALT2, B4GALT3, B4GALT6, CHST10, FUT8, LHB, MAN2A1, MAN2A2, MGAT2, MGAT3, MGAT5, ST6GAL1]
GO:0001821	Reactions specific to the complex N-glycan synthesis pathway	REACTOME_Pathways_09.11.2016	0.54	1	0.84	1	[-1]	Group201	60	6	[CHST10, FUT8, LHB, MAN2A1, MAN2A2, MGAT2]
GO:0000252	Synthesis of glycosylphosphatidylinositol (GPI)	REACTOME_Pathways_09.11.2016	0.79	1	0.22	1	[-1]	Group202	53.3333	8	[PIGA, PIGB, PIGG, PIGH, PIGL, PIGN, PIGP, PIGX]
GO:0000253	Attachment of GPI anchor to uPAR	REACTOME_Pathways_09.11.2016	0.22	1	0.22	1	[-1]	Group202	62.5	15	[DPM1, GPAA1, PGAP1, PIGA, PIGB, PIGG, PIGH, PIGK, PIGL, PIGN, PIGP, PIGS, PIGT, PIGU, PIGX]
GO:0000257	Post-translational modification: synthesis of GPI-anchored proteins	REACTOME_Pathways_09.11.2016	0.22	1	0.22	1	[-1]	Group202	62.5	15	[DPM1, GPAA1, PGAP1, PIGA, PIGB, PIGG, PIGH, PIGK, PIGL, PIGN, PIGP, PIGS, PIGT, PIGU, PIGX]
GO:0000080	Meiotic synapsis	REACTOME_Pathways_09.11.2016	0.041	1	0.041	1	[-1]	Group203	52.9316	325	[AAAS, ACD, AHCTF1, AKAP9, AKT1, AKT2, AKT3, ALMS1, ANAPC1, ANAPC10, ANAPC11, ANAPC16, ANAPC2, ANAPC4, ARPP19, ATM, ATR, AURKB, B9D2, BABAM1, BORA, BRCC3, BTRC, BUB3, CCND1, CCND2, CCNE2, CDC16, CDC23, CDC26, CDC27, CDC7, CDCA5, CDK11A, CDK5RAP2, CDK6, CDK7, CDKN1B, CDKN2A, CDKN2C, CDKN2D, CENPC, CENPF, CENPH, CENPK, CENPM, CENPN, CENPO, CENPQ, CENPS, CENPX, CEP131, CEP152, CEP192, CEP290, CEP41,…
GO:0000201	Meiosis	REACTOME_Pathways_09.11.2016	0.041	1	0.041	1	[-1]	Group203	52.9316	325	[AAAS, ACD, AHCTF1, AKAP9, AKT1, AKT2, AKT3, ALMS1, ANAPC1, ANAPC10, ANAPC11, ANAPC16, ANAPC2, ANAPC4, ARPP19, ATM, ATR, AURKB, B9D2, BABAM1, BORA, BRCC3, BTRC, BUB3, CCND1, CCND2, CCNE2, CDC16, CDC23, CDC26, CDC27, CDC7, CDCA5, CDK11A, CDK5RAP2, CDK6, CDK7, CDKN1B, CDKN2A, CDKN2C, CDKN2D, CENPC, CENPF, CENPH, CENPK, CENPM, CENPN, CENPO, CENPQ, CENPS, CENPX, CEP131, CEP152, CEP192, CEP290, CEP41,…
GO:0000275	Cell Cycle	REACTOME_Pathways_09.11.2016	0.041	1	0.041	1	[-1]	Group203	52.9316	325	[AAAS, ACD, AHCTF1, AKAP9, AKT1, AKT2, AKT3, ALMS1, ANAPC1, ANAPC10, ANAPC11, ANAPC16, ANAPC2, ANAPC4, ARPP19, ATM, ATR, AURKB, B9D2, BABAM1, BORA, BRCC3, BTRC, BUB3, CCND1, CCND2, CCNE2, CDC16, CDC23, CDC26, CDC27, CDC7, CDCA5, CDK11A, CDK5RAP2, CDK6, CDK7, CDKN1B, CDKN2A, CDKN2C, CDKN2D, CENPC, CENPF, CENPH, CENPK, CENPM, CENPN, CENPO, CENPQ, CENPS, CENPX, CEP131, CEP152, CEP192, CEP290, CEP41,…
GO:0000297	Synthesis of PIPs at the Golgi membrane	REACTOME_Pathways_09.11.2016	0.16	1	0.16	1	[-1]	Group204	64	16	[FIG4, INPP5E, MTM1, MTMR2, MTMR4, OCRL, PI4K2B, PI4KA, PIK3C2A, PIK3C2G, PIK3C3, PIK3R4, PIKFYVE, SACM1L, TPTE, VAC14]
GO:0000298	Synthesis of PIPs at the early endosome membrane	REACTOME_Pathways_09.11.2016	0.16	1	0.16	1	[-1]	Group204	64	16	[FIG4, INPP5E, MTM1, MTMR2, MTMR4, OCRL, PI4K2B, PI4KA, PIK3C2A, PIK3C2G, PIK3C3, PIK3R4, PIKFYVE, SACM1L, TPTE, VAC14]
GO:0000299	Synthesis of PIPs at the late endosome membrane	REACTOME_Pathways_09.11.2016	0.16	1	0.16	1	[-1]	Group204	64	16	[FIG4, INPP5E, MTM1, MTMR2, MTMR4, OCRL, PI4K2B, PI4KA, PIK3C2A, PIK3C2G, PIK3C3, PIK3R4, PIKFYVE, SACM1L, TPTE, VAC14]
GO:0000305	Mitochondrial Uncoupling Proteins	REACTOME_Pathways_09.11.2016	0.68	1	0.68	1	[-1]	Group205	60	3	[SLC25A14, SLC25A27, UCP3]
GO:0000332	The fatty acid cycling model	REACTOME_Pathways_09.11.2016	0.68	1	0.68	1	[-1]	Group205	60	3	[SLC25A14, SLC25A27, UCP3]
GO:0000333	The proton buffering model	REACTOME_Pathways_09.11.2016	0.68	1	0.68	1	[-1]	Group205	60	3	[SLC25A14, SLC25A27, UCP3]
GO:0000209	Amino Acid conjugation	REACTOME_Pathways_09.11.2016	0.5	1	0.5	1	[-1]	Group206	33.3333	3	[ACSM5, GLYAT, GLYATL1]
GO:0000231	Conjugation of carboxylic acids	REACTOME_Pathways_09.11.2016	0.5	1	0.5	1	[-1]	Group206	33.3333	3	[ACSM5, GLYAT, GLYATL1]
GO:0000414	Conjugation of salicylate with glycine	REACTOME_Pathways_09.11.2016	0.5	1	0.5	1	[-1]	Group206	33.3333	3	[ACSM5, GLYAT, GLYATL1]
GO:0000469	Metabolism of porphyrins	REACTOME_Pathways_09.11.2016	0.14	1	0.14	1	[-1]	Group207	29.4118	5	[BLVRA, BLVRB, CPOX, FECH, HMOX2]
GO:0000470	Heme biosynthesis	REACTOME_Pathways_09.11.2016	0.14	1	0.14	1	[-1]	Group207	29.4118	5	[BLVRA, BLVRB, CPOX, FECH, HMOX2]
GO:0000471	Heme degradation	REACTOME_Pathways_09.11.2016	1	1	0.14	1	[-1]	Group207	50	3	[BLVRA, BLVRB, HMOX2]
GO:0000351	Entry of Influenza Virion into Host Cell via Endocytosis	REACTOME_Pathways_09.11.2016	0.085	1	0.085	1	[-1]	Group208	75	9	[ACTB, ACTG1, AP2M1, CLTA, CLTB, DAB2, DNM1, GJA1, MYO6]
GO:0000490	Gap junction degradation	REACTOME_Pathways_09.11.2016	0.085	1	0.085	1	[-1]	Group208	75	9	[ACTB, ACTG1, AP2M1, CLTA, CLTB, DAB2, DNM1, GJA1, MYO6]
GO:0000530	Formation of annular gap junctions	REACTOME_Pathways_09.11.2016	0.085	1	0.085	1	[-1]	Group208	75	9	[ACTB, ACTG1, AP2M1, CLTA, CLTB, DAB2, DNM1, GJA1, MYO6]
GO:0000662	Synthesis of 5-eicosatetraenoic acids	REACTOME_Pathways_09.11.2016	0.33	1	0.29	1	[-1]	Group209	66.6667	6	[ALOX5, ALOX5AP, GPX1, GPX2, LTC4S, PON2]
GO:0000666	Synthesis of 12-eicosatetraenoic acid derivatives	REACTOME_Pathways_09.11.2016	1	1	0.29	1	[-1]	Group209	50	3	[ALOX15, GPX1, GPX2]
GO:0000668	Synthesis of 15-eicosatetraenoic acid derivatives	REACTOME_Pathways_09.11.2016	0.11	1	0.29	1	[-1]	Group209	83.3333	5	[ALOX15, ALOX15B, GPX1, GPX2, PTGS2]
GO:0000773	Clearance of Nuclear Envelope Membranes from Chromatin	REACTOME_Pathways_09.11.2016	0.75	1	0.75	1	[-1]	Group210	40	4	[LEMD2, LEMD3, PPP2CA, PPP2R2A]
GO:0000774	Initiation of Nuclear Envelope Reformation	REACTOME_Pathways_09.11.2016	0.75	1	0.75	1	[-1]	Group210	40	4	[LEMD2, LEMD3, PPP2CA, PPP2R2A]
GO:0000775	Nuclear Envelope Reassembly	REACTOME_Pathways_09.11.2016	0.75	1	0.75	1	[-1]	Group210	40	4	[LEMD2, LEMD3, PPP2CA, PPP2R2A]
GO:0000832	HSF1 activation	REACTOME_Pathways_09.11.2016	0.0017	0.51	0.0017	0.37	[-1]	Group211	77.4194	24	[AKT1S1, CAMK2A, CAMK2G, CREBBP, CRYAB, DNAJB1, EEF1A1, EP300, FKBP4, HSBP1, HSF1, HSP90AA1, HSP90AB1, HSPA1A, HSPA1B, HSPA1L, MLST8, MTOR, PTGES3, RPA1, RPA2, RPA3, RPTOR, YWHAE]
GO:0000834	Attenuation phase	REACTOME_Pathways_09.11.2016	0.0017	0.51	0.0017	0.37	[-1]	Group211	77.4194	24	[AKT1S1, CAMK2A, CAMK2G, CREBBP, CRYAB, DNAJB1, EEF1A1, EP300, FKBP4, HSBP1, HSF1, HSP90AA1, HSP90AB1, HSPA1A, HSPA1B, HSPA1L, MLST8, MTOR, PTGES3, RPA1, RPA2, RPA3, RPTOR, YWHAE]
GO:0000835	HSF1-dependent transactivation	REACTOME_Pathways_09.11.2016	0.0017	0.51	0.0017	0.37	[-1]	Group211	77.4194	24	[AKT1S1, CAMK2A, CAMK2G, CREBBP, CRYAB, DNAJB1, EEF1A1, EP300, FKBP4, HSBP1, HSF1, HSP90AA1, HSP90AB1, HSPA1A, HSPA1B, HSPA1L, MLST8, MTOR, PTGES3, RPA1, RPA2, RPA3, RPTOR, YWHAE]
GO:0000878	Amine ligand-binding receptors	REACTOME_Pathways_09.11.2016	0.0031	0.88	0.0031	0.63	[-1]	Group212	26.1905	11	[ADRA1A, ADRA2B, ADRA2C, CHRM4, HRH1, HRH2, HTR1B, HTR1D, HTR2A, HTR6, TAAR8]
GO:0000947	Serotonin receptors	REACTOME_Pathways_09.11.2016	0.38	1	0.0031	0.63	[-1]	Group212	33.3333	4	[HTR1B, HTR1D, HTR2A, HTR6]
GO:0000948	Adrenoceptors	REACTOME_Pathways_09.11.2016	0.5	1	0.0031	0.63	[-1]	Group212	33.3333	3	[ADRA1A, ADRA2B, ADRA2C]
GO:0000935	Prefoldin mediated transfer of substrate to CCT/TriC	REACTOME_Pathways_09.11.2016	0.25	1	0.18	1	[-1]	Group213	60.7143	17	[ACTB, CCT2, CCT4, CCT6A, CCT6B, CCT7, PFDN4, PFDN5, TCP1, TUBA1C, TUBA3C, TUBB2A, TUBB2B, TUBB3, TUBB4A, TUBB4B, TUBB6]
GO:0000940	Folding of actin by CCT/TriC	REACTOME_Pathways_09.11.2016	0.21	1	0.18	1	[-1]	Group213	70	7	[ACTB, CCT2, CCT4, CCT6A, CCT6B, CCT7, TCP1]
GO:0000942	Association of TriC/CCT with target proteins during biosynthesis	REACTOME_Pathways_09.11.2016	0.32	1	0.18	1	[-1]	Group213	57.8947	22	[CCNE2, CCT2, CCT4, CCT6A, CCT6B, CCT7, DCAF7, FBXL3, FBXL5, FBXO4, FBXO6, FBXW2, FBXW7, FKBP9, HDAC3, LONP2, SKIV2L, SPHK1, STAT3, TCP1, WRAP53, XRN2]
GO:0000953	Eicosanoid ligand-binding receptors	REACTOME_Pathways_09.11.2016	0.79	1	0.79	1	[-1]	Group214	53.3333	8	[CYSLTR1, GPR17, LTB4R2, PTGER2, PTGER3, PTGER4, PTGFR, TBXA2R]
GO:0000954	Leukotriene receptors	REACTOME_Pathways_09.11.2016	0.68	1	0.79	1	[-1]	Group214	60	3	[CYSLTR1, GPR17, LTB4R2]
GO:0000955	Prostanoid ligand receptors	REACTOME_Pathways_09.11.2016	0.79	1	0.79	1	[-1]	Group214	53.3333	8	[CYSLTR1, GPR17, LTB4R2, PTGER2, PTGER3, PTGER4, PTGFR, TBXA2R]
GO:0000050	Neurotransmitter Release Cycle	REACTOME_Pathways_09.11.2016	0.24	1	0.24	1	[-1]	Group215	43.8356	64	[ABAT, AHCYL2, APBA1, ARL6IP5, CALM1, CALM2, CALM3, CASK, CPLX1, DNAJC5, GLS, LIN7B, NAAA, PPFIA1, PPFIA4, SLC12A3, SLC12A5, SLC12A6, SLC12A7, SLC15A1, SLC15A4, SLC16A10, SLC17A5, SLC17A7, SLC18A3, SLC1A1, SLC1A7, SLC20A1, SLC20A2, SLC24A1, SLC24A3, SLC25A26, SLC26A1, SLC26A11, SLC26A4, SLC26A6, SLC34A1, SLC34A3, SLC36A1, SLC38A2, SLC43A1, SLC43A2, SLC4A1, SLC4A4, SLC4A5, SLC4A8, SLC5A12, SLC6A6,…
GO:0000626	Glutamate Neurotransmitter Release Cycle	REACTOME_Pathways_09.11.2016	0.24	1	0.24	1	[-1]	Group215	43.8356	64	[ABAT, AHCYL2, APBA1, ARL6IP5, CALM1, CALM2, CALM3, CASK, CPLX1, DNAJC5, GLS, LIN7B, NAAA, PPFIA1, PPFIA4, SLC12A3, SLC12A5, SLC12A6, SLC12A7, SLC15A1, SLC15A4, SLC16A10, SLC17A5, SLC17A7, SLC18A3, SLC1A1, SLC1A7, SLC20A1, SLC20A2, SLC24A1, SLC24A3, SLC25A26, SLC26A1, SLC26A11, SLC26A4, SLC26A6, SLC34A1, SLC34A3, SLC36A1, SLC38A2, SLC43A1, SLC43A2, SLC4A1, SLC4A4, SLC4A5, SLC4A8, SLC5A12, SLC6A6,…
GO:0001025	Transport of inorganic cations/anions and amino acids/oligopeptides	REACTOME_Pathways_09.11.2016	0.24	1	0.24	1	[-1]	Group215	43.8356	64	[ABAT, AHCYL2, APBA1, ARL6IP5, CALM1, CALM2, CALM3, CASK, CPLX1, DNAJC5, GLS, LIN7B, NAAA, PPFIA1, PPFIA4, SLC12A3, SLC12A5, SLC12A6, SLC12A7, SLC15A1, SLC15A4, SLC16A10, SLC17A5, SLC17A7, SLC18A3, SLC1A1, SLC1A7, SLC20A1, SLC20A2, SLC24A1, SLC24A3, SLC25A26, SLC26A1, SLC26A11, SLC26A4, SLC26A6, SLC34A1, SLC34A3, SLC36A1, SLC38A2, SLC43A1, SLC43A2, SLC4A1, SLC4A4, SLC4A5, SLC4A8, SLC5A12, SLC6A6,…
GO:0000782	Scavenging by Class F Receptors	REACTOME_Pathways_09.11.2016	0.31	1	0.31	1	[-1]	Group216	60	15	[CALR, FGR, HSP90AA1, HSPH1, LRP8, PECAM1, PLA2G4A, PPP2CA, PPP2R5B, PPP2R5C, PPP2R5E, PTPN11, PTPN6, SPARC, STAB1]
GO:0000783	Scavenging by Class H Receptors	REACTOME_Pathways_09.11.2016	0.31	1	0.31	1	[-1]	Group216	60	15	[CALR, FGR, HSP90AA1, HSPH1, LRP8, PECAM1, PLA2G4A, PPP2CA, PPP2R5B, PPP2R5C, PPP2R5E, PTPN11, PTPN6, SPARC, STAB1]
GO:0001063	Platelet sensitization by LDL	REACTOME_Pathways_09.11.2016	0.31	1	0.31	1	[-1]	Group216	60	15	[CALR, FGR, HSP90AA1, HSPH1, LRP8, PECAM1, PLA2G4A, PPP2CA, PPP2R5B, PPP2R5C, PPP2R5E, PTPN11, PTPN6, SPARC, STAB1]
GO:0000263	PKA-mediated phosphorylation of key metabolic factors	REACTOME_Pathways_09.11.2016	0.75	1	0.79	1	[-1]	Group217	40	4	[MLXIPL, PPP2CA, PRKACA, PRKACB]
GO:0000271	PP2A-mediated dephosphorylation of key metabolic factors	REACTOME_Pathways_09.11.2016	0.75	1	0.79	1	[-1]	Group217	40	4	[MLXIPL, PPP2CA, PRKACA, PRKACB]
GO:0001081	CREB phosphorylation through the activation of Adenylate Cyclase	REACTOME_Pathways_09.11.2016	0.72	1	0.79	1	[-1]	Group217	57.1429	4	[ADCY1, CREB1, PRKACA, PRKACB]
GO:0001286	Cargo trafficking to the periciliary membrane	REACTOME_Pathways_09.11.2016	0.16	1	0.16	1	[-1]	Group218	58.8235	30	[ARF4, ARL13B, ARL6, ASAP1, BBIP1, BBS10, BBS12, BBS2, BBS4, BBS5, BBS9, CCT2, CCT4, CNGA2, CNGA4, CNGB1, CYS1, EXOC7, INPP5E, LZTFL1, MKKS, NPHP3, PDE6D, PKD1, PKD2, RAB11A, RAB11FIP3, SSTR3, TCP1, TTC8]
GO:0001287	BBSome-mediated cargo-targeting to cilium	REACTOME_Pathways_09.11.2016	0.14	1	0.16	1	[-1]	Group218	65.2174	15	[ARL6, BBIP1, BBS10, BBS12, BBS2, BBS4, BBS5, BBS9, CCT2, CCT4, LZTFL1, MKKS, SSTR3, TCP1, TTC8]
GO:0001292	Trafficking of myristoylated proteins to the cilium	REACTOME_Pathways_09.11.2016	0.16	1	0.16	1	[-1]	Group218	58.8235	30	[ARF4, ARL13B, ARL6, ASAP1, BBIP1, BBS10, BBS12, BBS2, BBS4, BBS5, BBS9, CCT2, CCT4, CNGA2, CNGA4, CNGB1, CYS1, EXOC7, INPP5E, LZTFL1, MKKS, NPHP3, PDE6D, PKD1, PKD2, RAB11A, RAB11FIP3, SSTR3, TCP1, TTC8]
GO:0001304	Ligand-receptor interactions	REACTOME_Pathways_09.11.2016	0.49	1	0.25	1	[-1]	Group219	62.5	5	[BOC, CDON, GAS1, HHIP, SHH]
GO:0001308	Activation of SMO	REACTOME_Pathways_09.11.2016	0.35	1	0.25	1	[-1]	Group219	61.1111	11	[BOC, CDON, CSNK1A1, EFCAB7, EVC, GAS1, GAS8, GRK2, IQCE, KIF3A, SHH]
GO:0001357	HHAT G278V abrogates palmitoylation of Hh-Np	REACTOME_Pathways_09.11.2016	0.49	1	0.25	1	[-1]	Group219	62.5	5	[BOC, CDON, GAS1, HHIP, SHH]
GO:0001171	Mitophagy	REACTOME_Pathways_09.11.2016	0.19	1	0.19	1	[-1]	Group220	62.069	18	[ATG12, ATG5, ATXN3, JOSD1, MAP1LC3A, MAP1LC3B, MFN1, MFN2, PARK2, RAD23A, RAD23B, SQSTM1, TOMM20, TOMM5, TOMM6, TOMM7, UBC, VDAC1]
GO:0001172	Pink/Parkin Mediated Mitophagy	REACTOME_Pathways_09.11.2016	0.19	1	0.19	1	[-1]	Group220	62.069	18	[ATG12, ATG5, ATXN3, JOSD1, MAP1LC3A, MAP1LC3B, MFN1, MFN2, PARK2, RAD23A, RAD23B, SQSTM1, TOMM20, TOMM5, TOMM6, TOMM7, UBC, VDAC1]
GO:0001406	Josephin domain DUBs	REACTOME_Pathways_09.11.2016	0.19	1	0.19	1	[-1]	Group220	62.069	18	[ATG12, ATG5, ATXN3, JOSD1, MAP1LC3A, MAP1LC3B, MFN1, MFN2, PARK2, RAD23A, RAD23B, SQSTM1, TOMM20, TOMM5, TOMM6, TOMM7, UBC, VDAC1]
GO:0000809	Detoxification of Reactive Oxygen Species	REACTOME_Pathways_09.11.2016	0.0027	0.77	0.0027	0.56	[-1]	Group221	35.8779	47	[AQP8, ATOX1, ATP7A, CAMP, CAT, CCS, CD4, CTSG, CYCS, DEFB1, DEFB104B, DEFB107A, DEFB108B, DEFB123, DEFB124, DEFB128, DEFB130, DEFB136, DEFB4A, ELANE, ERO1A, GPX1, GPX2, GPX3, GPX5, GPX6, GPX7, GPX8, GSTP1, ITLN1, LEAP2, LTF, P4HB, PDZD11, PGLYRP4, PI3, PRDX1, PRTN3, RNASE6, S100A7A, S100A8, SEMG1, SLC11A1, SOD1, SOD2, SOD3, TXN]
GO:0001476	Antimicrobial peptides	REACTOME_Pathways_09.11.2016	0.0027	0.77	0.0027	0.56	[-1]	Group221	35.8779	47	[AQP8, ATOX1, ATP7A, CAMP, CAT, CCS, CD4, CTSG, CYCS, DEFB1, DEFB104B, DEFB107A, DEFB108B, DEFB123, DEFB124, DEFB128, DEFB130, DEFB136, DEFB4A, ELANE, ERO1A, GPX1, GPX2, GPX3, GPX5, GPX6, GPX7, GPX8, GSTP1, ITLN1, LEAP2, LTF, P4HB, PDZD11, PGLYRP4, PI3, PRDX1, PRTN3, RNASE6, S100A7A, S100A8, SEMG1, SLC11A1, SOD1, SOD2, SOD3, TXN]
GO:0001482	Ion influx/efflux at host-pathogen interface	REACTOME_Pathways_09.11.2016	0.0027	0.77	0.0027	0.56	[-1]	Group221	35.8779	47	[AQP8, ATOX1, ATP7A, CAMP, CAT, CCS, CD4, CTSG, CYCS, DEFB1, DEFB104B, DEFB107A, DEFB108B, DEFB123, DEFB124, DEFB128, DEFB130, DEFB136, DEFB4A, ELANE, ERO1A, GPX1, GPX2, GPX3, GPX5, GPX6, GPX7, GPX8, GSTP1, ITLN1, LEAP2, LTF, P4HB, PDZD11, PGLYRP4, PI3, PRDX1, PRTN3, RNASE6, S100A7A, S100A8, SEMG1, SLC11A1, SOD1, SOD2, SOD3, TXN]
GO:0000152	Intrinsic Pathway of Fibrin Clot Formation	REACTOME_Pathways_09.11.2016	0.2	1	0.2	1	[-1]	Group222	38.4615	15	[A2M, CD177, F12, F5, F7, GP1BA, KLKB1, PRCP, PROCR, PRTN3, SERPINE2, SERPING1, TFPI, THBD, VWF]
GO:0000153	Common Pathway of Fibrin Clot Formation	REACTOME_Pathways_09.11.2016	0.2	1	0.2	1	[-1]	Group222	38.4615	15	[A2M, CD177, F12, F5, F7, GP1BA, KLKB1, PRCP, PROCR, PRTN3, SERPINE2, SERPING1, TFPI, THBD, VWF]
GO:0000154	Formation of Fibrin Clot (Clotting Cascade)	REACTOME_Pathways_09.11.2016	0.2	1	0.2	1	[-1]	Group222	38.4615	15	[A2M, CD177, F12, F5, F7, GP1BA, KLKB1, PRCP, PROCR, PRTN3, SERPINE2, SERPING1, TFPI, THBD, VWF]
GO:0000495	Cholesterol biosynthesis	REACTOME_Pathways_09.11.2016	1	1	1	1	[-1]	Group223	47.8261	11	[ACAT2, CYP51A1, EBP, FDPS, GGPS1, HMGCS1, IDI2, LSS, MSMO1, NSDHL, SQLE]
GO:0001499	Cholesterol biosynthesis via desmosterol	REACTOME_Pathways_09.11.2016	1	1	1	1	[-1]	Group223	47.8261	11	[ACAT2, CYP51A1, EBP, FDPS, GGPS1, HMGCS1, IDI2, LSS, MSMO1, NSDHL, SQLE]
GO:0001500	Cholesterol biosynthesis via lathosterol	REACTOME_Pathways_09.11.2016	1	1	1	1	[-1]	Group223	47.8261	11	[ACAT2, CYP51A1, EBP, FDPS, GGPS1, HMGCS1, IDI2, LSS, MSMO1, NSDHL, SQLE]
GO:0000722	Establishment of Sister Chromatid Cohesion	REACTOME_Pathways_09.11.2016	0.81	1	0.81	1	[-1]	Group224	52.9412	9	[CDCA5, MAU2, PDS5A, PDS5B, RAD21, SMC3, STAG1, STAG2, WAPL]
GO:0000723	Cohesin Loading onto Chromatin	REACTOME_Pathways_09.11.2016	0.81	1	0.81	1	[-1]	Group224	52.9412	9	[CDCA5, MAU2, PDS5A, PDS5B, RAD21, SMC3, STAG1, STAG2, WAPL]
GO:0001523	Mitotic Telophase/Cytokinesis	REACTOME_Pathways_09.11.2016	0.81	1	0.81	1	[-1]	Group224	52.9412	9	[CDCA5, MAU2, PDS5A, PDS5B, RAD21, SMC3, STAG1, STAG2, WAPL]
GO:0000204	G0 and Early G1	REACTOME_Pathways_09.11.2016	0.72	1	0.72	1	[-1]	Group225	45.4545	15	[CCNE2, CDKN1B, DYRK1A, HDAC1, LIN37, LIN52, LIN9, MYBL2, PCBP4, PCNA, RB1, RBBP4, RBL2, TFDP1, TOP2A]
GO:0001485	TP53 Regulates Transcription of Genes Involved in G1 Cell Cycle Arrest	REACTOME_Pathways_09.11.2016	0.72	1	0.72	1	[-1]	Group225	45.4545	15	[CCNE2, CDKN1B, DYRK1A, HDAC1, LIN37, LIN52, LIN9, MYBL2, PCBP4, PCNA, RB1, RBBP4, RBL2, TFDP1, TOP2A]
GO:0001538	Phosphorylation of proteins involved in G1/S transition by active Cyclin E:Cdk2 complexes	REACTOME_Pathways_09.11.2016	0.72	1	0.72	1	[-1]	Group225	45.4545	15	[CCNE2, CDKN1B, DYRK1A, HDAC1, LIN37, LIN52, LIN9, MYBL2, PCBP4, PCNA, RB1, RBBP4, RBL2, TFDP1, TOP2A]
GO:0000468	Hexose transport	REACTOME_Pathways_09.11.2016	0.27	1	0.27	1	[-1]	Group226	50.6757	450	[AAAS, ABCA2, ABCA4, ABCA8, ABCA9, ABCB10, ABCB4, ABCB7, ABCB8, ABCC1, ABCC10, ABCC2, ABCC3, ABCC5, ABCC6, ABCC8, ABCD1, ABCE1, ABCF1, ABCG1, ADCY1, ADCY4, ADCY6, ADCY7, ADCY9, ADD2, ADD3, AGL, AGRN, AHCYL2, AKR1A1, AKR1B1, ALB, ALDH1A1, ALDOA, ALDOB, ALDOC, AMY1C, ANKH, ANO1, ANO10, ANO6, ANO9, APOA1, APOD, AQP1, AQP12A, AQP3, AQP4, AQP5, AQP8, ARHGEF9, ASIC4, ASPH, ATP10A, ATP11A, ATP11B, ATP11…
GO:0000915	Transmembrane transport of small molecules	REACTOME_Pathways_09.11.2016	0.27	1	0.27	1	[-1]	Group226	50.6757	450	[AAAS, ABCA2, ABCA4, ABCA8, ABCA9, ABCB10, ABCB4, ABCB7, ABCB8, ABCC1, ABCC10, ABCC2, ABCC3, ABCC5, ABCC6, ABCC8, ABCD1, ABCE1, ABCF1, ABCG1, ADCY1, ADCY4, ADCY6, ADCY7, ADCY9, ADD2, ADD3, AGL, AGRN, AHCYL2, AKR1A1, AKR1B1, ALB, ALDH1A1, ALDOA, ALDOB, ALDOC, AMY1C, ANKH, ANO1, ANO10, ANO6, ANO9, APOA1, APOD, AQP1, AQP12A, AQP3, AQP4, AQP5, AQP8, ARHGEF9, ASIC4, ASPH, ATP10A, ATP11A, ATP11B, ATP11…
GO:0001027	SLC-mediated transmembrane transport	REACTOME_Pathways_09.11.2016	0.27	1	0.27	1	[-1]	Group226	50.6757	450	[AAAS, ABCA2, ABCA4, ABCA8, ABCA9, ABCB10, ABCB4, ABCB7, ABCB8, ABCC1, ABCC10, ABCC2, ABCC3, ABCC5, ABCC6, ABCC8, ABCD1, ABCE1, ABCF1, ABCG1, ADCY1, ADCY4, ADCY6, ADCY7, ADCY9, ADD2, ADD3, AGL, AGRN, AHCYL2, AKR1A1, AKR1B1, ALB, ALDH1A1, ALDOA, ALDOB, ALDOC, AMY1C, ANKH, ANO1, ANO10, ANO6, ANO9, APOA1, APOD, AQP1, AQP12A, AQP3, AQP4, AQP5, AQP8, ARHGEF9, ASIC4, ASPH, ATP10A, ATP11A, ATP11B, ATP11…
GO:0001592	Metabolism of carbohydrates	REACTOME_Pathways_09.11.2016	0.27	1	0.27	1	[-1]	Group226	50.6757	450	[AAAS, ABCA2, ABCA4, ABCA8, ABCA9, ABCB10, ABCB4, ABCB7, ABCB8, ABCC1, ABCC10, ABCC2, ABCC3, ABCC5, ABCC6, ABCC8, ABCD1, ABCE1, ABCF1, ABCG1, ADCY1, ADCY4, ADCY6, ADCY7, ADCY9, ADD2, ADD3, AGL, AGRN, AHCYL2, AKR1A1, AKR1B1, ALB, ALDH1A1, ALDOA, ALDOB, ALDOC, AMY1C, ANKH, ANO1, ANO10, ANO6, ANO9, APOA1, APOD, AQP1, AQP12A, AQP3, AQP4, AQP5, AQP8, ARHGEF9, ASIC4, ASPH, ATP10A, ATP11A, ATP11B, ATP11…
GO:0000607	Regulation of pyruvate dehydrogenase (PDH) complex	REACTOME_Pathways_09.11.2016	0.57	1	0.57	1	[-1]	Group227	52.5641	41	[ACO2, ADH1C, AKR1C3, ALDH1A1, BSG, CPT1A, CRABP2, CS, CYP26B1, CYP26C1, D2HGDH, DHRS3, DHRS4, DLST, FABP5, FH, IDH2, L2HGDH, LDHA, MDH2, MPC1, MPC2, NNT, PDHA1, PDHB, PDHX, PDK1, PDK3, PDK4, PDP1, PDPR, PPARD, RARA, RARB, RDH11, RDH14, SDHC, SDHD, SLC16A1, SLC16A3, SUCLG2]
GO:0001222	Signaling by Retinoic Acid	REACTOME_Pathways_09.11.2016	0.57	1	0.57	1	[-1]	Group227	52.5641	41	[ACO2, ADH1C, AKR1C3, ALDH1A1, BSG, CPT1A, CRABP2, CS, CYP26B1, CYP26C1, D2HGDH, DHRS3, DHRS4, DLST, FABP5, FH, IDH2, L2HGDH, LDHA, MDH2, MPC1, MPC2, NNT, PDHA1, PDHB, PDHX, PDK1, PDK3, PDK4, PDP1, PDPR, PPARD, RARA, RARB, RDH11, RDH14, SDHC, SDHD, SLC16A1, SLC16A3, SUCLG2]
GO:0001574	Pyruvate metabolism	REACTOME_Pathways_09.11.2016	0.57	1	0.57	1	[-1]	Group227	52.5641	41	[ACO2, ADH1C, AKR1C3, ALDH1A1, BSG, CPT1A, CRABP2, CS, CYP26B1, CYP26C1, D2HGDH, DHRS3, DHRS4, DLST, FABP5, FH, IDH2, L2HGDH, LDHA, MDH2, MPC1, MPC2, NNT, PDHA1, PDHB, PDHX, PDK1, PDK3, PDK4, PDP1, PDPR, PPARD, RARA, RARB, RDH11, RDH14, SDHC, SDHD, SLC16A1, SLC16A3, SUCLG2]
GO:0001594	Pyruvate metabolism and Citric Acid (TCA) cycle	REACTOME_Pathways_09.11.2016	0.57	1	0.57	1	[-1]	Group227	52.5641	41	[ACO2, ADH1C, AKR1C3, ALDH1A1, BSG, CPT1A, CRABP2, CS, CYP26B1, CYP26C1, D2HGDH, DHRS3, DHRS4, DLST, FABP5, FH, IDH2, L2HGDH, LDHA, MDH2, MPC1, MPC2, NNT, PDHA1, PDHB, PDHX, PDK1, PDK3, PDK4, PDP1, PDPR, PPARD, RARA, RARB, RDH11, RDH14, SDHC, SDHD, SLC16A1, SLC16A3, SUCLG2]
GO:0001653	Purine salvage	REACTOME_Pathways_09.11.2016	0.83	1	0.61	1	[-1]	Group228	52.1739	12	[ADA, ADAL, ADK, AMPD2, AMPD3, CAT, DCK, GDA, GPX1, HPRT1, NT5E, PNP]
GO:0001654	Purine catabolism	REACTOME_Pathways_09.11.2016	0.83	1	0.61	1	[-1]	Group228	52.1739	12	[ADA, ADAL, ADK, AMPD2, AMPD3, CAT, DCK, GDA, GPX1, HPRT1, NT5E, PNP]
GO:0000020	SLBP independent Processing of Histone Pre-mRNAs	REACTOME_Pathways_09.11.2016	0.76	1	0.55	1	[-1]	Group229	54.5455	6	[NCBP1, NCBP2, SLBP, SNRPE, SNRPF, SNRPG]
GO:0001662	Processing of Capped Intronless Pre-mRNA	REACTOME_Pathways_09.11.2016	0.55	1	0.55	1	[-1]	Group229	56	14	[CPSF1, CPSF3, CPSF4, CPSF7, CSTF1, CSTF3, FIP1L1, NCBP1, NCBP2, NUDT21, SLBP, SNRPE, SNRPF, SNRPG]
GO:0001705	SLBP Dependent Processing of Replication-Dependent Histone Pre-mRNAs	REACTOME_Pathways_09.11.2016	0.76	1	0.55	1	[-1]	Group229	54.5455	6	[NCBP1, NCBP2, SLBP, SNRPE, SNRPF, SNRPG]
GO:0001706	Processing of Intronless Pre-mRNAs	REACTOME_Pathways_09.11.2016	0.55	1	0.55	1	[-1]	Group229	56	14	[CPSF1, CPSF3, CPSF4, CPSF7, CSTF1, CSTF3, FIP1L1, NCBP1, NCBP2, NUDT21, SLBP, SNRPE, SNRPF, SNRPG]
GO:0000021	Activation of BIM and translocation to mitochondria	REACTOME_Pathways_09.11.2016	0.85	1	0.85	1	[-1]	Group230	46.6667	14	[APP, BAD, BCL2L11, BID, CAPN2, CAST, DYNLL1, FOXO3, GOLGA2, JUN, MAPK8, PRDX1, SOD2, YWHAE]
GO:0000025	BH3-only proteins associate with and inactivate anti-apoptotic BCL-2 members	REACTOME_Pathways_09.11.2016	0.85	1	0.85	1	[-1]	Group230	46.6667	14	[APP, BAD, BCL2L11, BID, CAPN2, CAST, DYNLL1, FOXO3, GOLGA2, JUN, MAPK8, PRDX1, SOD2, YWHAE]
GO:0001753	Deregulated CDK5 triggers multiple neurodegenerative pathways in AlzheimerÃ¢â‚¬â„¢s disease models	REACTOME_Pathways_09.11.2016	0.85	1	0.85	1	[-1]	Group230	46.6667	14	[APP, BAD, BCL2L11, BID, CAPN2, CAST, DYNLL1, FOXO3, GOLGA2, JUN, MAPK8, PRDX1, SOD2, YWHAE]
GO:0001754	Neurodegenerative Diseases	REACTOME_Pathways_09.11.2016	0.85	1	0.85	1	[-1]	Group230	46.6667	14	[APP, BAD, BCL2L11, BID, CAPN2, CAST, DYNLL1, FOXO3, GOLGA2, JUN, MAPK8, PRDX1, SOD2, YWHAE]
GO:0000084	ROS, RNS production in response to bacteria	REACTOME_Pathways_09.11.2016	0.29	1	0.29	1	[-1]	Group231	56.1404	32	[ATP6AP1, ATP6V0C, ATP6V0E1, ATP6V1A, ATP6V1B2, ATP6V1C1, ATP6V1C2, ATP6V1D, ATP6V1E2, ATP6V1G1, ATP6V1H, CAMP, CP, CYBRD1, FTH1, HMOX2, INS, INSR, LTF, NCF1, NCF2, NOS1, NOS2, NOS3, PRTN3, SLC11A1, SLC22A17, SLC40A1, SLC46A1, STEAP2, STEAP3, TCIRG1]
GO:0001703	Insulin receptor recycling	REACTOME_Pathways_09.11.2016	0.29	1	0.29	1	[-1]	Group231	56.1404	32	[ATP6AP1, ATP6V0C, ATP6V0E1, ATP6V1A, ATP6V1B2, ATP6V1C1, ATP6V1C2, ATP6V1D, ATP6V1E2, ATP6V1G1, ATP6V1H, CAMP, CP, CYBRD1, FTH1, HMOX2, INS, INSR, LTF, NCF1, NCF2, NOS1, NOS2, NOS3, PRTN3, SLC11A1, SLC22A17, SLC40A1, SLC46A1, STEAP2, STEAP3, TCIRG1]
GO:0001793	Transferrin endocytosis and recycling	REACTOME_Pathways_09.11.2016	0.29	1	0.29	1	[-1]	Group231	56.1404	32	[ATP6AP1, ATP6V0C, ATP6V0E1, ATP6V1A, ATP6V1B2, ATP6V1C1, ATP6V1C2, ATP6V1D, ATP6V1E2, ATP6V1G1, ATP6V1H, CAMP, CP, CYBRD1, FTH1, HMOX2, INS, INSR, LTF, NCF1, NCF2, NOS1, NOS2, NOS3, PRTN3, SLC11A1, SLC22A17, SLC40A1, SLC46A1, STEAP2, STEAP3, TCIRG1]
GO:0000968	Muscle contraction	REACTOME_Pathways_09.11.2016	0.12	1	0.12	1	[-1]	Group232	43.7229	101	[ACTG2, ACTN2, AHCYL1, AKAP9, ANXA1, ANXA6, ASPH, ATP10A, ATP11A, ATP11B, ATP11C, ATP12A, ATP13A2, ATP1A1, ATP1A4, ATP1B1, ATP1B2, ATP1B3, ATP2A1, ATP2A2, ATP2B4, ATP2C1, ATP2C2, ATP7A, ATP8B1, ATP8B2, ATP8B4, ATP9A, ATP9B, CACNA1C, CACNA1S, CACNA2D1, CACNA2D2, CACNG4, CACNG5, CACNG8, CALD1, CALM1, CALM2, CALM3, CAMK2A, CAMK2G, CUTC, DES, DMD, DYSF, FKBP1B, FXYD3, FXYD6, FXYD7, GATA4, HIPK1, HIPK…
GO:0001243	Cardiac conduction	REACTOME_Pathways_09.11.2016	0.12	1	0.12	1	[-1]	Group232	43.7229	101	[ACTG2, ACTN2, AHCYL1, AKAP9, ANXA1, ANXA6, ASPH, ATP10A, ATP11A, ATP11B, ATP11C, ATP12A, ATP13A2, ATP1A1, ATP1A4, ATP1B1, ATP1B2, ATP1B3, ATP2A1, ATP2A2, ATP2B4, ATP2C1, ATP2C2, ATP7A, ATP8B1, ATP8B2, ATP8B4, ATP9A, ATP9B, CACNA1C, CACNA1S, CACNA2D1, CACNA2D2, CACNG4, CACNG5, CACNG8, CALD1, CALM1, CALM2, CALM3, CAMK2A, CAMK2G, CUTC, DES, DMD, DYSF, FKBP1B, FXYD3, FXYD6, FXYD7, GATA4, HIPK1, HIPK…
GO:0001249	Ion homeostasis	REACTOME_Pathways_09.11.2016	0.12	1	0.12	1	[-1]	Group232	43.7229	101	[ACTG2, ACTN2, AHCYL1, AKAP9, ANXA1, ANXA6, ASPH, ATP10A, ATP11A, ATP11B, ATP11C, ATP12A, ATP13A2, ATP1A1, ATP1A4, ATP1B1, ATP1B2, ATP1B3, ATP2A1, ATP2A2, ATP2B4, ATP2C1, ATP2C2, ATP7A, ATP8B1, ATP8B2, ATP8B4, ATP9A, ATP9B, CACNA1C, CACNA1S, CACNA2D1, CACNA2D2, CACNG4, CACNG5, CACNG8, CALD1, CALM1, CALM2, CALM3, CAMK2A, CAMK2G, CUTC, DES, DMD, DYSF, FKBP1B, FXYD3, FXYD6, FXYD7, GATA4, HIPK1, HIPK…
GO:0001800	Ion transport by P-type ATPases	REACTOME_Pathways_09.11.2016	0.12	1	0.12	1	[-1]	Group232	43.7229	101	[ACTG2, ACTN2, AHCYL1, AKAP9, ANXA1, ANXA6, ASPH, ATP10A, ATP11A, ATP11B, ATP11C, ATP12A, ATP13A2, ATP1A1, ATP1A4, ATP1B1, ATP1B2, ATP1B3, ATP2A1, ATP2A2, ATP2B4, ATP2C1, ATP2C2, ATP7A, ATP8B1, ATP8B2, ATP8B4, ATP9A, ATP9B, CACNA1C, CACNA1S, CACNA2D1, CACNA2D2, CACNG4, CACNG5, CACNG8, CALD1, CALM1, CALM2, CALM3, CAMK2A, CAMK2G, CUTC, DES, DMD, DYSF, FKBP1B, FXYD3, FXYD6, FXYD7, GATA4, HIPK1, HIPK…
GO:0001158	Defective GALNT3 causes familial hyperphosphatemic tumoral calcinosis (HFTC)	REACTOME_Pathways_09.11.2016	0.63	1	1	1	[-1]	Group233	41.1765	7	[MUC1, MUC12, MUC17, MUC2, MUC4, MUC5AC, MUC6]
GO:0001162	Defective C1GALT1C1 causes Tn polyagglutination syndrome (TNPS)	REACTOME_Pathways_09.11.2016	0.63	1	1	1	[-1]	Group233	41.1765	7	[MUC1, MUC12, MUC17, MUC2, MUC4, MUC5AC, MUC6]
GO:0001165	Defective GALNT12 causes colorectal cancer 1 (CRCS1)	REACTOME_Pathways_09.11.2016	0.63	1	1	1	[-1]	Group233	41.1765	7	[MUC1, MUC12, MUC17, MUC2, MUC4, MUC5AC, MUC6]
GO:0001826	Termination of O-glycan biosynthesis	REACTOME_Pathways_09.11.2016	1	1	1	1	[-1]	Group233	48	12	[MUC1, MUC12, MUC17, MUC2, MUC4, MUC5AC, MUC6, ST3GAL1, ST3GAL2, ST6GAL1, ST6GALNAC2, ST6GALNAC4]
GO:0001226	Mitochondrial translation initiation	REACTOME_Pathways_09.11.2016	0.29	1	0.29	1	[-1]	Group234	54.3478	50	[CHCHD1, GFM1, GFM2, MRPL1, MRPL10, MRPL13, MRPL14, MRPL17, MRPL19, MRPL2, MRPL28, MRPL3, MRPL30, MRPL32, MRPL33, MRPL34, MRPL35, MRPL37, MRPL39, MRPL42, MRPL43, MRPL44, MRPL47, MRPL48, MRPL51, MRPL52, MRPL53, MRPL57, MRPL58, MRPS10, MRPS14, MRPS18B, MRPS18C, MRPS2, MRPS21, MRPS23, MRPS24, MRPS25, MRPS27, MRPS28, MRPS30, MRPS35, MRPS36, MRPS5, MRPS6, MRPS9, MRRF, MTIF2, MTRF1L, TSFM]
GO:0001227	Mitochondrial translation	REACTOME_Pathways_09.11.2016	0.29	1	0.29	1	[-1]	Group234	54.3478	50	[CHCHD1, GFM1, GFM2, MRPL1, MRPL10, MRPL13, MRPL14, MRPL17, MRPL19, MRPL2, MRPL28, MRPL3, MRPL30, MRPL32, MRPL33, MRPL34, MRPL35, MRPL37, MRPL39, MRPL42, MRPL43, MRPL44, MRPL47, MRPL48, MRPL51, MRPL52, MRPL53, MRPL57, MRPL58, MRPS10, MRPS14, MRPS18B, MRPS18C, MRPS2, MRPS21, MRPS23, MRPS24, MRPS25, MRPS27, MRPS28, MRPS30, MRPS35, MRPS36, MRPS5, MRPS6, MRPS9, MRRF, MTIF2, MTRF1L, TSFM]
GO:0001230	Mitochondrial translation elongation	REACTOME_Pathways_09.11.2016	0.29	1	0.29	1	[-1]	Group234	54.3478	50	[CHCHD1, GFM1, GFM2, MRPL1, MRPL10, MRPL13, MRPL14, MRPL17, MRPL19, MRPL2, MRPL28, MRPL3, MRPL30, MRPL32, MRPL33, MRPL34, MRPL35, MRPL37, MRPL39, MRPL42, MRPL43, MRPL44, MRPL47, MRPL48, MRPL51, MRPL52, MRPL53, MRPL57, MRPL58, MRPS10, MRPS14, MRPS18B, MRPS18C, MRPS2, MRPS21, MRPS23, MRPS24, MRPS25, MRPS27, MRPS28, MRPS30, MRPS35, MRPS36, MRPS5, MRPS6, MRPS9, MRRF, MTIF2, MTRF1L, TSFM]
GO:0001231	Mitochondrial translation termination	REACTOME_Pathways_09.11.2016	0.29	1	0.29	1	[-1]	Group234	54.3478	50	[CHCHD1, GFM1, GFM2, MRPL1, MRPL10, MRPL13, MRPL14, MRPL17, MRPL19, MRPL2, MRPL28, MRPL3, MRPL30, MRPL32, MRPL33, MRPL34, MRPL35, MRPL37, MRPL39, MRPL42, MRPL43, MRPL44, MRPL47, MRPL48, MRPL51, MRPL52, MRPL53, MRPL57, MRPL58, MRPS10, MRPS14, MRPS18B, MRPS18C, MRPS2, MRPS21, MRPS23, MRPS24, MRPS25, MRPS27, MRPS28, MRPS30, MRPS35, MRPS36, MRPS5, MRPS6, MRPS9, MRRF, MTIF2, MTRF1L, TSFM]
GO:0000099	Methionine salvage pathway	REACTOME_Pathways_09.11.2016	0.44	1	0.32	1	[-1]	Group235	66.6667	4	[ADI1, ENOPH1, MRI1, MTAP]
GO:0000238	Sulfide oxidation to sulfate	REACTOME_Pathways_09.11.2016	0.32	1	0.32	1	[-1]	Group235	38.4615	10	[ADI1, ADO, CBS, CDO1, CTH, ENOPH1, GCLM, MRI1, MTAP, SQRDL]
GO:0000241	Sulfur amino acid metabolism	REACTOME_Pathways_09.11.2016	0.32	1	0.32	1	[-1]	Group235	38.4615	10	[ADI1, ADO, CBS, CDO1, CTH, ENOPH1, GCLM, MRI1, MTAP, SQRDL]
GO:0000282	Nef-mediates down modulation of cell surface receptors by recruiting them to clathrin adapters	REACTOME_Pathways_09.11.2016	0.43	1	0.43	1	[-1]	Group236	57.6923	15	[AP1B1, AP1G1, AP1M1, AP1S2, AP2B1, AP2M1, AP2S1, ATP6V1H, CD28, CD4, CD8B, ELMO1, HCK, PAK2, RAC1]
GO:0000284	Nef mediated downregulation of MHC class I complex cell surface expression	REACTOME_Pathways_09.11.2016	0.43	1	0.43	1	[-1]	Group236	57.6923	15	[AP1B1, AP1G1, AP1M1, AP1S2, AP2B1, AP2M1, AP2S1, ATP6V1H, CD28, CD4, CD8B, ELMO1, HCK, PAK2, RAC1]
GO:0000285	Nef and signal transduction	REACTOME_Pathways_09.11.2016	0.72	1	0.43	1	[-1]	Group236	57.1429	4	[ELMO1, HCK, PAK2, RAC1]
GO:0000286	The role of Nef in HIV-1 replication and disease pathogenesis	REACTOME_Pathways_09.11.2016	0.43	1	0.43	1	[-1]	Group236	57.6923	15	[AP1B1, AP1G1, AP1M1, AP1S2, AP2B1, AP2M1, AP2S1, ATP6V1H, CD28, CD4, CD8B, ELMO1, HCK, PAK2, RAC1]
GO:0000197	Inositol phosphate metabolism	REACTOME_Pathways_09.11.2016	0.77	1	0.77	1	[-1]	Group237	51.0638	24	[CALM1, CALM2, CALM3, IMPA1, IMPA2, INPP5D, INPP5J, INPPL1, IP6K1, IP6K2, IPPK, ITPK1, ITPKB, MINPP1, NUDT10, NUDT3, NUDT4, OCRL, PLCB4, PLCD4, PLCH1, PLD4, PPIP5K2, PTEN]
GO:0000452	Synthesis of pyrophosphates in the cytosol	REACTOME_Pathways_09.11.2016	0.21	1	0.77	1	[-1]	Group237	70	7	[IP6K1, IPPK, ITPK1, NUDT10, NUDT3, NUDT4, PPIP5K2]
GO:0000453	Synthesis of IP2, IP, and Ins in the cytosol	REACTOME_Pathways_09.11.2016	0.77	1	0.77	1	[-1]	Group237	51.0638	24	[CALM1, CALM2, CALM3, IMPA1, IMPA2, INPP5D, INPP5J, INPPL1, IP6K1, IP6K2, IPPK, ITPK1, ITPKB, MINPP1, NUDT10, NUDT3, NUDT4, OCRL, PLCB4, PLCD4, PLCH1, PLD4, PPIP5K2, PTEN]
GO:0000455	Synthesis of IP3 and IP4 in the cytosol	REACTOME_Pathways_09.11.2016	1	1	0.77	1	[-1]	Group237	50	14	[CALM1, CALM2, CALM3, INPP5D, INPP5J, INPPL1, ITPK1, ITPKB, OCRL, PLCB4, PLCD4, PLCH1, PLD4, PTEN]
GO:0000504	Estrogen biosynthesis	REACTOME_Pathways_09.11.2016	0.59	1	0.59	1	[-1]	Group238	43.75	14	[AKR1B1, CYP11A1, CYP11B1, CYP21A2, FDX1, FDX1L, HSD11B2, HSD17B11, HSD17B12, HSD17B14, LHB, SRD5A1, STARD3, STARD3NL]
GO:0000531	Metabolism of steroid hormones	REACTOME_Pathways_09.11.2016	0.59	1	0.59	1	[-1]	Group238	43.75	14	[AKR1B1, CYP11A1, CYP11B1, CYP21A2, FDX1, FDX1L, HSD11B2, HSD17B11, HSD17B12, HSD17B14, LHB, SRD5A1, STARD3, STARD3NL]
GO:0000532	Pregnenolone biosynthesis	REACTOME_Pathways_09.11.2016	0.54	1	0.59	1	[-1]	Group238	60	6	[AKR1B1, CYP11A1, FDX1, FDX1L, STARD3, STARD3NL]
GO:0001250	Defective CYP11A1 causes Adrenal insufficiency, congenital, with 46,XY sex reversal (AICSR)	REACTOME_Pathways_09.11.2016	0.36	1	0.59	1	[-1]	Group238	75	3	[CYP11A1, FDX1, FDX1L]
GO:0000162	Metabolism	REACTOME_Pathways_09.11.2016	0.00016	0.049	0.00016	0.036	[-1]	Group239	52.6239	1083	[A2M, AAAS, AACS, AADAC, AADAT, AASDHPPT, ABCB4, ABCB7, ABCC1, ABCC3, ABCC5, ABCC8, ABCD1, ABCD4, ABCG1, ABHD14B, ABHD3, ABHD4, ABHD5, ACAA1, ACAA2, ACACA, ACACB, ACAD10, ACAD8, ACAD9, ACADM, ACADSB, ACADVL, ACAT1, ACAT2, ACBD5, ACBD6, ACBD7, ACER1, ACHE, ACMSD, ACO2, ACOT1, ACOT4, ACOT7, ACOT8, ACOT9, ACSBG2, ACSL3, ACSL4, ACSL5, ACSM5, ACSS1, ACSS3, ADA, ADAL, ADCY1, ADCY4, ADCY6, ADCY7, ADCY9,…
GO:0000303	Glycosphingolipid metabolism	REACTOME_Pathways_09.11.2016	0.00016	0.049	0.00016	0.036	[-1]	Group239	52.6239	1083	[A2M, AAAS, AACS, AADAC, AADAT, AASDHPPT, ABCB4, ABCB7, ABCC1, ABCC3, ABCC5, ABCC8, ABCD1, ABCD4, ABCG1, ABHD14B, ABHD3, ABHD4, ABHD5, ACAA1, ACAA2, ACACA, ACACB, ACAD10, ACAD8, ACAD9, ACADM, ACADSB, ACADVL, ACAT1, ACAT2, ACBD5, ACBD6, ACBD7, ACER1, ACHE, ACMSD, ACO2, ACOT1, ACOT4, ACOT7, ACOT8, ACOT9, ACSBG2, ACSL3, ACSL4, ACSL5, ACSM5, ACSS1, ACSS3, ADA, ADAL, ADCY1, ADCY4, ADCY6, ADCY7, ADCY9,…
GO:0001042	Sphingolipid metabolism	REACTOME_Pathways_09.11.2016	0.00016	0.049	0.00016	0.036	[-1]	Group239	52.6239	1083	[A2M, AAAS, AACS, AADAC, AADAT, AASDHPPT, ABCB4, ABCB7, ABCC1, ABCC3, ABCC5, ABCC8, ABCD1, ABCD4, ABCG1, ABHD14B, ABHD3, ABHD4, ABHD5, ACAA1, ACAA2, ACACA, ACACB, ACAD10, ACAD8, ACAD9, ACADM, ACADSB, ACADVL, ACAT1, ACAT2, ACBD5, ACBD6, ACBD7, ACER1, ACHE, ACMSD, ACO2, ACOT1, ACOT4, ACOT7, ACOT8, ACOT9, ACSBG2, ACSL3, ACSL4, ACSL5, ACSM5, ACSS1, ACSS3, ADA, ADAL, ADCY1, ADCY4, ADCY6, ADCY7, ADCY9,…
GO:0001240	Metabolism of lipids and lipoproteins	REACTOME_Pathways_09.11.2016	0.00016	0.049	0.00016	0.036	[-1]	Group239	52.6239	1083	[A2M, AAAS, AACS, AADAC, AADAT, AASDHPPT, ABCB4, ABCB7, ABCC1, ABCC3, ABCC5, ABCC8, ABCD1, ABCD4, ABCG1, ABHD14B, ABHD3, ABHD4, ABHD5, ACAA1, ACAA2, ACACA, ACACB, ACAD10, ACAD8, ACAD9, ACADM, ACADSB, ACADVL, ACAT1, ACAT2, ACBD5, ACBD6, ACBD7, ACER1, ACHE, ACMSD, ACO2, ACOT1, ACOT4, ACOT7, ACOT8, ACOT9, ACSBG2, ACSL3, ACSL4, ACSL5, ACSM5, ACSS1, ACSS3, ADA, ADAL, ADCY1, ADCY4, ADCY6, ADCY7, ADCY9,…
GO:0000030	SMAC binds to IAPs	REACTOME_Pathways_09.11.2016	0.11	1	0.11	1	[-1]	Group240	83.3333	5	[CASP3, CASP7, DIABLO, PAK2, XIAP]
GO:0000031	SMAC-mediated dissociation of IAP:caspase complexes	REACTOME_Pathways_09.11.2016	0.11	1	0.11	1	[-1]	Group240	83.3333	5	[CASP3, CASP7, DIABLO, PAK2, XIAP]
GO:0000033	SMAC-mediated apoptotic response	REACTOME_Pathways_09.11.2016	0.11	1	0.11	1	[-1]	Group240	83.3333	5	[CASP3, CASP7, DIABLO, PAK2, XIAP]
GO:0000639	Stimulation of the cell death response by PAK-2p34	REACTOME_Pathways_09.11.2016	0.11	1	0.11	1	[-1]	Group240	83.3333	5	[CASP3, CASP7, DIABLO, PAK2, XIAP]
GO:0000663	Synthesis of Leukotrienes (LT) and Eoxins (EX)	REACTOME_Pathways_09.11.2016	0.83	1	0.69	1	[-1]	Group241	52.1739	12	[ABCC1, ALOX15, ALOX5, ALOX5AP, CYP4A11, CYP4B1, CYP4F22, GGT1, HPGD, LTC4S, MAPKAPK2, PTGR1]
GO:0000665	Synthesis of Lipoxins (LX)	REACTOME_Pathways_09.11.2016	0.83	1	0.69	1	[-1]	Group241	52.1739	12	[ABCC1, ALOX15, ALOX5, ALOX5AP, CYP4A11, CYP4B1, CYP4F22, GGT1, HPGD, LTC4S, MAPKAPK2, PTGR1]
GO:0000667	Arachidonic acid metabolism	REACTOME_Pathways_09.11.2016	0.69	1	0.69	1	[-1]	Group241	45.614	26	[ABCC1, AKR1C3, ALOX15, ALOX15B, ALOX5, ALOX5AP, CBR1, CYP1B1, CYP2U1, CYP4A11, CYP4B1, CYP4F22, FAM213B, GGT1, GPX1, GPX2, HPGD, LTC4S, MAPKAPK2, PLA2G4A, PON2, PTGES, PTGES3, PTGIS, PTGR1, PTGS2]
GO:0000680	Synthesis of Prostaglandins (PG) and Thromboxanes (TX)	REACTOME_Pathways_09.11.2016	0.44	1	0.69	1	[-1]	Group241	60	9	[AKR1C3, CBR1, FAM213B, HPGD, PTGES, PTGES3, PTGIS, PTGR1, PTGS2]
GO:0000049	Depolarization of the Presynaptic Terminal Triggers the Opening of Calcium Channels	REACTOME_Pathways_09.11.2016	0.044	1	0.044	1	[-1]	Group242	35.9375	23	[AKAP9, CACFD1, CACNA1A, CACNA1C, CACNA1S, CACNA2D1, CACNA2D2, CACNG4, CACNG5, CACNG8, CALM1, CALM2, CALM3, CAMK2A, CAMK2G, KCNE1, KCNE3, KCNE4, SCN2B, SCN3B, SCN4B, SCN5A, SCN8A]
GO:0001244	Phase 0 - rapid depolarisation	REACTOME_Pathways_09.11.2016	0.044	1	0.044	1	[-1]	Group242	35.9375	23	[AKAP9, CACFD1, CACNA1A, CACNA1C, CACNA1S, CACNA2D1, CACNA2D2, CACNG4, CACNG5, CACNG8, CALM1, CALM2, CALM3, CAMK2A, CAMK2G, KCNE1, KCNE3, KCNE4, SCN2B, SCN3B, SCN4B, SCN5A, SCN8A]
GO:0001245	Phase 2 - plateau phase	REACTOME_Pathways_09.11.2016	0.044	1	0.044	1	[-1]	Group242	35.9375	23	[AKAP9, CACFD1, CACNA1A, CACNA1C, CACNA1S, CACNA2D1, CACNA2D2, CACNG4, CACNG5, CACNG8, CALM1, CALM2, CALM3, CAMK2A, CAMK2G, KCNE1, KCNE3, KCNE4, SCN2B, SCN3B, SCN4B, SCN5A, SCN8A]
GO:0001246	Phase 1 - inactivation of fast Na+ channels	REACTOME_Pathways_09.11.2016	0.044	1	0.044	1	[-1]	Group242	35.9375	23	[AKAP9, CACFD1, CACNA1A, CACNA1C, CACNA1S, CACNA2D1, CACNA2D2, CACNG4, CACNG5, CACNG8, CALM1, CALM2, CALM3, CAMK2A, CAMK2G, KCNE1, KCNE3, KCNE4, SCN2B, SCN3B, SCN4B, SCN5A, SCN8A]
GO:0000784	SUMO is conjugated to E1 (UBA2:SAE1)	REACTOME_Pathways_09.11.2016	0.54	1	0.54	1	[-1]	Group243	60	6	[SAE1, SENP5, SUMO1, SUMO2, SUMO3, UBA2]
GO:0000785	SUMO is transferred from E1 to E2 (UBE2I, UBC9)	REACTOME_Pathways_09.11.2016	0.54	1	0.54	1	[-1]	Group243	60	6	[SAE1, SENP5, SUMO1, SUMO2, SUMO3, UBA2]
GO:0000786	SUMO is proteolytically processed	REACTOME_Pathways_09.11.2016	0.54	1	0.54	1	[-1]	Group243	60	6	[SAE1, SENP5, SUMO1, SUMO2, SUMO3, UBA2]
GO:0000797	Processing and activation of SUMO	REACTOME_Pathways_09.11.2016	0.54	1	0.54	1	[-1]	Group243	60	6	[SAE1, SENP5, SUMO1, SUMO2, SUMO3, UBA2]
GO:0000578	Keratan sulfate degradation	REACTOME_Pathways_09.11.2016	0.085	1	0.085	1	[-1]	Group244	75	9	[FMOD, GLB1, GLB1L, GNS, HEXA, LUM, OGN, OMD, PRELP]
GO:0000858	Defective CHST6 causes MCDC1	REACTOME_Pathways_09.11.2016	0.085	1	0.085	1	[-1]	Group244	75	9	[FMOD, GLB1, GLB1L, GNS, HEXA, LUM, OGN, OMD, PRELP]
GO:0000860	Defective ST3GAL3 causes MCT12 and EIEE15	REACTOME_Pathways_09.11.2016	0.085	1	0.085	1	[-1]	Group244	75	9	[FMOD, GLB1, GLB1L, GNS, HEXA, LUM, OGN, OMD, PRELP]
GO:0000861	Defective B4GALT1 causes B4GALT1-CDG (CDG-2d)	REACTOME_Pathways_09.11.2016	0.085	1	0.085	1	[-1]	Group244	75	9	[FMOD, GLB1, GLB1L, GNS, HEXA, LUM, OGN, OMD, PRELP]
GO:0000706	SeMet incorporation into proteins	REACTOME_Pathways_09.11.2016	0.87	1	0.87	1	[-1]	Group245	47.619	20	[CARS2, DARS, DARS2, EPRS, GARS, HARS, IARS, IARS2, KARS, LARS2, MARS, NARS, PPA1, PPA2, QARS, RARS, RARS2, TARS, WARS2, YARS2]
GO:0000889	Cytosolic tRNA aminoacylation	REACTOME_Pathways_09.11.2016	0.87	1	0.87	1	[-1]	Group245	47.619	20	[CARS2, DARS, DARS2, EPRS, GARS, HARS, IARS, IARS2, KARS, LARS2, MARS, NARS, PPA1, PPA2, QARS, RARS, RARS2, TARS, WARS2, YARS2]
GO:0000890	tRNA Aminoacylation	REACTOME_Pathways_09.11.2016	0.87	1	0.87	1	[-1]	Group245	47.619	20	[CARS2, DARS, DARS2, EPRS, GARS, HARS, IARS, IARS2, KARS, LARS2, MARS, NARS, PPA1, PPA2, QARS, RARS, RARS2, TARS, WARS2, YARS2]
GO:0000891	Mitochondrial tRNA aminoacylation	REACTOME_Pathways_09.11.2016	0.82	1	0.87	1	[-1]	Group245	52.381	11	[CARS2, DARS2, GARS, IARS2, KARS, LARS2, PPA2, QARS, RARS2, WARS2, YARS2]
GO:0000532	Pregnenolone biosynthesis	REACTOME_Pathways_09.11.2016	0.54	1	0.29	1	[-1]	Group246	60	6	[AKR1B1, CYP11A1, FDX1, FDX1L, STARD3, STARD3NL]
GO:0000703	Electron transport from NADPH to Ferredoxin	REACTOME_Pathways_09.11.2016	0.27	1	0.29	1	[-1]	Group246	71.4286	5	[FDX1, FDX1L, LYRM4, SLC25A28, SLC25A37]
GO:0001250	Defective CYP11A1 causes Adrenal insufficiency, congenital, with 46,XY sex reversal (AICSR)	REACTOME_Pathways_09.11.2016	0.36	1	0.29	1	[-1]	Group246	75	3	[CYP11A1, FDX1, FDX1L]
GO:0000881	Signaling by Robo receptor	REACTOME_Pathways_09.11.2016	0.15	1	0.15	1	[-1]	Group247	62.5	20	[ABL1, ABL2, CAP1, CDC42, CLASP1, ENAH, EVL, GPC1, NCK1, NCK2, PAK1, PAK2, PAK4, PAK6, PFN2, RAC1, ROBO1, SOS2, SRGAP2, VASP]
GO:0001044	Activation of Rac	REACTOME_Pathways_09.11.2016	0.2	1	0.15	1	[-1]	Group247	66.6667	10	[GPC1, NCK1, NCK2, PAK1, PAK2, PAK4, PAK6, RAC1, ROBO1, SOS2]
GO:0001046	Inactivation of Cdc42 and Rac	REACTOME_Pathways_09.11.2016	0.15	1	0.15	1	[-1]	Group247	62.5	20	[ABL1, ABL2, CAP1, CDC42, CLASP1, ENAH, EVL, GPC1, NCK1, NCK2, PAK1, PAK2, PAK4, PAK6, PFN2, RAC1, ROBO1, SOS2, SRGAP2, VASP]
GO:0001052	Role of Abl in Robo-Slit signaling	REACTOME_Pathways_09.11.2016	0.33	1	0.15	1	[-1]	Group247	66.6667	6	[ABL1, ABL2, CAP1, CLASP1, GPC1, ROBO1]
GO:0000681	Scavenging of heme from plasma	REACTOME_Pathways_09.11.2016	0.34	1	0.39	1	[-1]	Group248	57.5	23	[ALB, APOA1, APOE, APOL1, CALR, CD163, COL1A1, COL1A2, COL3A1, COLEC12, FTH1, HBB, HPX, HSP90AA1, HSP90B1, HSPH1, MARCO, MSR1, SAA1, SCARA5, SCGB3A2, SPARC, STAB1]
GO:0000684	Binding and Uptake of Ligands by Scavenger Receptors	REACTOME_Pathways_09.11.2016	0.34	1	0.39	1	[-1]	Group248	57.5	23	[ALB, APOA1, APOE, APOL1, CALR, CD163, COL1A1, COL1A2, COL3A1, COLEC12, FTH1, HBB, HPX, HSP90AA1, HSP90B1, HSPH1, MARCO, MSR1, SAA1, SCARA5, SCGB3A2, SPARC, STAB1]
GO:0000781	Scavenging by Class A Receptors	REACTOME_Pathways_09.11.2016	0.25	1	0.39	1	[-1]	Group248	60.7143	17	[APOA1, APOE, CALR, COL1A1, COL1A2, COL3A1, COLEC12, FLNA, FTH1, GP1BA, HSP90B1, MARCO, MSR1, SCARA5, SCGB3A2, VWF, YWHAZ]
GO:0001059	GP1b-IX-V activation signalling	REACTOME_Pathways_09.11.2016	0.25	1	0.39	1	[-1]	Group248	60.7143	17	[APOA1, APOE, CALR, COL1A1, COL1A2, COL3A1, COLEC12, FLNA, FTH1, GP1BA, HSP90B1, MARCO, MSR1, SCARA5, SCGB3A2, VWF, YWHAZ]
GO:0000980	Free fatty acids regulate insulin secretion	REACTOME_Pathways_09.11.2016	1	1	0.47	1	[-1]	Group249	50	10	[GATA4, GNA11, GNAQ, GPR119, PAX6, SEC11A, SEC11C, SPCS1, SPCS2, SPCS3]
GO:0000982	Synthesis, secretion, and inactivation of Glucose-dependent Insulinotropic Polypeptide (GIP)	REACTOME_Pathways_09.11.2016	1	1	0.47	1	[-1]	Group249	50	10	[GATA4, GNA11, GNAQ, GPR119, PAX6, SEC11A, SEC11C, SPCS1, SPCS2, SPCS3]
GO:0001020	Synthesis, secretion, and deacylation of Ghrelin	REACTOME_Pathways_09.11.2016	0.058	1	0.47	1	[-1]	Group249	72.2222	13	[ACHE, BCHE, GH1, IGF1, INS, KLF4, PLA2G7, SEC11A, SEC11C, SPCS1, SPCS2, SPCS3, UCN]
GO:0001068	Fatty Acids bound to GPR40 (FFAR1) regulate insulin secretion	REACTOME_Pathways_09.11.2016	1	1	0.47	1	[-1]	Group249	50	10	[GATA4, GNA11, GNAQ, GPR119, PAX6, SEC11A, SEC11C, SPCS1, SPCS2, SPCS3]
GO:0001028	Metal ion SLC transporters	REACTOME_Pathways_09.11.2016	0.84	1	0.84	1	[-1]	Group250	52	13	[CP, SLC11A1, SLC30A1, SLC30A5, SLC30A6, SLC30A7, SLC39A1, SLC39A10, SLC39A14, SLC39A6, SLC39A8, SLC40A1, SLC41A2]
GO:0001069	Zinc transporters	REACTOME_Pathways_09.11.2016	0.81	1	0.84	1	[-1]	Group250	52.9412	9	[SLC30A1, SLC30A5, SLC30A6, SLC30A7, SLC39A1, SLC39A10, SLC39A14, SLC39A6, SLC39A8]
GO:0001070	Zinc efflux and compartmentalization by the SLC30 family	REACTOME_Pathways_09.11.2016	0.72	1	0.84	1	[-1]	Group250	57.1429	4	[SLC30A1, SLC30A5, SLC30A6, SLC30A7]
GO:0001078	Zinc influx into cells by the SLC39 gene family	REACTOME_Pathways_09.11.2016	0.81	1	0.84	1	[-1]	Group250	52.9412	9	[SLC30A1, SLC30A5, SLC30A6, SLC30A7, SLC39A1, SLC39A10, SLC39A14, SLC39A6, SLC39A8]
GO:0000635	AKT-mediated inactivation of FOXO1A	REACTOME_Pathways_09.11.2016	0.023	1	0.0019	0.41	[-1]	Group251	75	15	[AKT1, AKT2, AKT3, DCP1A, DCP2, EXOSC2, EXOSC3, EXOSC7, EXOSC8, EXOSC9, FOXO1, MAPKAPK2, XRN1, YWHAB, ZFP36L1]
GO:0001057	mRNA decay by 3' to 5' exoribonuclease	REACTOME_Pathways_09.11.2016	0.32	1	0.0019	0.41	[-1]	Group251	62.5	10	[DCPS, EXOSC2, EXOSC3, EXOSC7, EXOSC8, EXOSC9, HBS1L, NT5C3B, SKIV2L, TTC37]
GO:0001121	Butyrate Response Factor 1 (BRF1) binds and destabilizes mRNA	REACTOME_Pathways_09.11.2016	0.023	1	0.0019	0.41	[-1]	Group251	75	15	[AKT1, AKT2, AKT3, DCP1A, DCP2, EXOSC2, EXOSC3, EXOSC7, EXOSC8, EXOSC9, FOXO1, MAPKAPK2, XRN1, YWHAB, ZFP36L1]
GO:0001123	Tristetraprolin (TTP, ZFP36) binds and destabilizes mRNA	REACTOME_Pathways_09.11.2016	0.09	1	0.0019	0.41	[-1]	Group251	70.5882	12	[DCP1A, DCP2, EXOSC2, EXOSC3, EXOSC7, EXOSC8, EXOSC9, MAPKAPK2, TNPO1, XRN1, YWHAB, ZFP36]
GO:0000971	Trafficking of AMPA receptors	REACTOME_Pathways_09.11.2016	0.73	1	0.73	1	[-1]	Group252	52.7778	19	[ADAM11, AKAP5, CACNG4, CACNG8, CAMK2A, CAMK2G, DLG1, EPB41L1, GRIA1, GRIA3, LGI3, LGI4, MDM2, MYO6, NSF, PRKCA, PRKCB, PRKCG, STX1A]
GO:0000972	Glutamate Binding, Activation of AMPA Receptors and Synaptic Plasticity	REACTOME_Pathways_09.11.2016	0.73	1	0.73	1	[-1]	Group252	52.7778	19	[ADAM11, AKAP5, CACNG4, CACNG8, CAMK2A, CAMK2G, DLG1, EPB41L1, GRIA1, GRIA3, LGI3, LGI4, MDM2, MYO6, NSF, PRKCA, PRKCB, PRKCG, STX1A]
GO:0000992	Trafficking of GluR2-containing AMPA receptors	REACTOME_Pathways_09.11.2016	1	1	0.73	1	[-1]	Group252	46.1538	6	[GRIA1, GRIA3, NSF, PRKCA, PRKCB, PRKCG]
GO:0001386	LGI-ADAM interactions	REACTOME_Pathways_09.11.2016	0.73	1	0.73	1	[-1]	Group252	52.7778	19	[ADAM11, AKAP5, CACNG4, CACNG8, CAMK2A, CAMK2G, DLG1, EPB41L1, GRIA1, GRIA3, LGI3, LGI4, MDM2, MYO6, NSF, PRKCA, PRKCB, PRKCG, STX1A]
GO:0001393	HDR through Single Strand Annealing (SSA)	REACTOME_Pathways_09.11.2016	0.19	1	0.0082	1	[-1]	Group253	37.8378	14	[ABL1, ATM, ATR, NBN, RAD1, RAD50, RAD51, RAD9A, RFC2, RMI1, RPA1, RPA2, RPA3, WRN]
GO:0001394	HDR through MMEJ (alt-NHEJ)	REACTOME_Pathways_09.11.2016	0.093	1	0.0082	1	[-1]	Group253	23.0769	3	[ATM, NBN, RAD50]
GO:0001414	Sensing of DNA Double Strand Breaks	REACTOME_Pathways_09.11.2016	0.093	1	0.0082	1	[-1]	Group253	23.0769	3	[ATM, NBN, RAD50]
GO:0001415	Resolution of D-loop Structures through Synthesis-Dependent Strand Annealing (SDSA)	REACTOME_Pathways_09.11.2016	0.076	1	0.0082	1	[-1]	Group253	30.7692	8	[ATM, NBN, RAD50, RAD51, RAD51D, RMI1, WRN, XRCC3]
GO:0001098	Biosynthesis of the N-glycan precursor (dolichol lipid-linked oligosaccharide, LLO) and transfer to a nascent protein	REACTOME_Pathways_09.11.2016	2.4e-06	0.00076	2.4e-06	0.00056	[-1]	Group254	62.3333	187	[ALG1, ALG10, ALG10B, ALG13, ALG14, ALG2, ALG5, ALG6, ALG8, ALG9, AMFR, ANK1, ANK2, ANK3, ANKRD28, AREG, ARF4, ARF5, ARFGAP2, ARFGAP3, ASGR1, B4GALNT2, B4GALT2, B4GALT3, B4GALT6, BET1, BET1L, CALR, CANX, CD55, CD59, CHST10, CMAS, CNIH1, CNIH2, CNIH3, COG1, COG5, COG6, COG8, COL7A1, COPA, COPB1, COPB2, COPE, COPZ2, CTSA, CTSC, CTSZ, DAD1, DCTN1, DCTN3, DCTN4, DCTN6, DERL1, DERL2, DHDDS, DOLPP1, DP…
GO:0001100	Asparagine N-linked glycosylation	REACTOME_Pathways_09.11.2016	2.4e-06	0.00076	2.4e-06	0.00056	[-1]	Group254	62.3333	187	[ALG1, ALG10, ALG10B, ALG13, ALG14, ALG2, ALG5, ALG6, ALG8, ALG9, AMFR, ANK1, ANK2, ANK3, ANKRD28, AREG, ARF4, ARF5, ARFGAP2, ARFGAP3, ASGR1, B4GALNT2, B4GALT2, B4GALT3, B4GALT6, BET1, BET1L, CALR, CANX, CD55, CD59, CHST10, CMAS, CNIH1, CNIH2, CNIH3, COG1, COG5, COG6, COG8, COL7A1, COPA, COPB1, COPB2, COPE, COPZ2, CTSA, CTSC, CTSZ, DAD1, DCTN1, DCTN3, DCTN4, DCTN6, DERL1, DERL2, DHDDS, DOLPP1, DP…
GO:0001103	Synthesis of substrates in N-glycan biosythesis	REACTOME_Pathways_09.11.2016	2.4e-06	0.00076	2.4e-06	0.00056	[-1]	Group254	62.3333	187	[ALG1, ALG10, ALG10B, ALG13, ALG14, ALG2, ALG5, ALG6, ALG8, ALG9, AMFR, ANK1, ANK2, ANK3, ANKRD28, AREG, ARF4, ARF5, ARFGAP2, ARFGAP3, ASGR1, B4GALNT2, B4GALT2, B4GALT3, B4GALT6, BET1, BET1L, CALR, CANX, CD55, CD59, CHST10, CMAS, CNIH1, CNIH2, CNIH3, COG1, COG5, COG6, COG8, COL7A1, COPA, COPB1, COPB2, COPE, COPZ2, CTSA, CTSC, CTSZ, DAD1, DCTN1, DCTN3, DCTN4, DCTN6, DERL1, DERL2, DHDDS, DOLPP1, DP…
GO:0001455	GDP-fucose biosynthesis	REACTOME_Pathways_09.11.2016	2.4e-06	0.00076	2.4e-06	0.00056	[-1]	Group254	62.3333	187	[ALG1, ALG10, ALG10B, ALG13, ALG14, ALG2, ALG5, ALG6, ALG8, ALG9, AMFR, ANK1, ANK2, ANK3, ANKRD28, AREG, ARF4, ARF5, ARFGAP2, ARFGAP3, ASGR1, B4GALNT2, B4GALT2, B4GALT3, B4GALT6, BET1, BET1L, CALR, CANX, CD55, CD59, CHST10, CMAS, CNIH1, CNIH2, CNIH3, COG1, COG5, COG6, COG8, COL7A1, COPA, COPB1, COPB2, COPE, COPZ2, CTSA, CTSC, CTSZ, DAD1, DCTN1, DCTN3, DCTN4, DCTN6, DERL1, DERL2, DHDDS, DOLPP1, DP…
GO:0000161	The citric acid (TCA) cycle and respiratory electron transport	REACTOME_Pathways_09.11.2016	0.0012	0.37	0.0012	0.27	[-1]	Group255	61.4458	102	[ACAD9, ACO2, ATP5A1, ATP5C1, ATP5E, ATP5F1, ATP5G1, ATP5G2, ATP5G3, ATP5H, ATP5I, ATP5J, ATP5J2, ATP5L, ATP5O, ATP5S, BSG, COQ10A, COX11, COX14, COX16, COX20, COX4I1, COX6A1, COX6B1, COX6C, COX7A2L, COX7B, COX7C, COX8A, CS, CYCS, D2HGDH, DLST, ETFA, ETFDH, FH, IDH2, L2HGDH, LDHA, LRPPRC, MDH2, MPC1, MPC2, NDUFA1, NDUFA10, NDUFA11, NDUFA12, NDUFA13, NDUFA3, NDUFA5, NDUFA7, NDUFA8, NDUFA9, NDUFAB1…
GO:0000258	Respiratory electron transport, ATP synthesis by chemiosmotic coupling, and heat production by uncoupling proteins.	REACTOME_Pathways_09.11.2016	0.0012	0.37	0.0012	0.27	[-1]	Group255	61.4458	102	[ACAD9, ACO2, ATP5A1, ATP5C1, ATP5E, ATP5F1, ATP5G1, ATP5G2, ATP5G3, ATP5H, ATP5I, ATP5J, ATP5J2, ATP5L, ATP5O, ATP5S, BSG, COQ10A, COX11, COX14, COX16, COX20, COX4I1, COX6A1, COX6B1, COX6C, COX7A2L, COX7B, COX7C, COX8A, CS, CYCS, D2HGDH, DLST, ETFA, ETFDH, FH, IDH2, L2HGDH, LDHA, LRPPRC, MDH2, MPC1, MPC2, NDUFA1, NDUFA10, NDUFA11, NDUFA12, NDUFA13, NDUFA3, NDUFA5, NDUFA7, NDUFA8, NDUFA9, NDUFAB1…
GO:0001433	Respiratory electron transport	REACTOME_Pathways_09.11.2016	0.0012	0.37	0.0012	0.27	[-1]	Group255	61.4458	102	[ACAD9, ACO2, ATP5A1, ATP5C1, ATP5E, ATP5F1, ATP5G1, ATP5G2, ATP5G3, ATP5H, ATP5I, ATP5J, ATP5J2, ATP5L, ATP5O, ATP5S, BSG, COQ10A, COX11, COX14, COX16, COX20, COX4I1, COX6A1, COX6B1, COX6C, COX7A2L, COX7B, COX7C, COX8A, CS, CYCS, D2HGDH, DLST, ETFA, ETFDH, FH, IDH2, L2HGDH, LDHA, LRPPRC, MDH2, MPC1, MPC2, NDUFA1, NDUFA10, NDUFA11, NDUFA12, NDUFA13, NDUFA3, NDUFA5, NDUFA7, NDUFA8, NDUFA9, NDUFAB1…
GO:0001467	Complex I biogenesis	REACTOME_Pathways_09.11.2016	0.0012	0.37	0.0012	0.27	[-1]	Group255	61.4458	102	[ACAD9, ACO2, ATP5A1, ATP5C1, ATP5E, ATP5F1, ATP5G1, ATP5G2, ATP5G3, ATP5H, ATP5I, ATP5J, ATP5J2, ATP5L, ATP5O, ATP5S, BSG, COQ10A, COX11, COX14, COX16, COX20, COX4I1, COX6A1, COX6B1, COX6C, COX7A2L, COX7B, COX7C, COX8A, CS, CYCS, D2HGDH, DLST, ETFA, ETFDH, FH, IDH2, L2HGDH, LDHA, LRPPRC, MDH2, MPC1, MPC2, NDUFA1, NDUFA10, NDUFA11, NDUFA12, NDUFA13, NDUFA3, NDUFA5, NDUFA7, NDUFA8, NDUFA9, NDUFAB1…
GO:0000081	Latent infection of Homo sapiens with Mycobacterium tuberculosis	REACTOME_Pathways_09.11.2016	1	1	1	1	[-1]	Group256	50	3	[LTF, S100A7A, S100A8]
GO:0000083	Response of Mtb to phagocytosis	REACTOME_Pathways_09.11.2016	1	1	1	1	[-1]	Group256	50	3	[LTF, S100A7A, S100A8]
GO:0001468	Metal sequestration by antimicrobial proteins	REACTOME_Pathways_09.11.2016	1	1	1	1	[-1]	Group256	50	3	[LTF, S100A7A, S100A8]
GO:0000032	Apoptotic cleavage of cellular proteins	REACTOME_Pathways_09.11.2016	0.5	1	0.88	1	[-1]	Group257	55.5556	20	[BCAP31, BIRC2, CASP3, CASP6, CASP7, CDH1, DBNL, DSP, FNTA, GAS2, MAPT, PLEC, PRKCD, PRKCQ, PTK2, ROCK1, STK24, TJP1, TJP2, VIM]
GO:0000149	Apoptosis induced DNA fragmentation	REACTOME_Pathways_09.11.2016	0.88	1	0.88	1	[-1]	Group257	50	25	[BCAP31, BIRC2, CASP3, CASP6, CASP7, CDH1, DBNL, DNM1L, DSP, FNTA, GAS2, HMGB1, HMGB2, KPNB1, MAPT, PAK2, PLEC, PRKCD, PRKCQ, PTK2, ROCK1, STK24, TJP1, TJP2, VIM]
GO:0000636	Activation of DNA fragmentation factor	REACTOME_Pathways_09.11.2016	0.88	1	0.88	1	[-1]	Group257	50	25	[BCAP31, BIRC2, CASP3, CASP6, CASP7, CDH1, DBNL, DNM1L, DSP, FNTA, GAS2, HMGB1, HMGB2, KPNB1, MAPT, PAK2, PLEC, PRKCD, PRKCQ, PTK2, ROCK1, STK24, TJP1, TJP2, VIM]
GO:0000749	Caspase-mediated cleavage of cytoskeletal proteins	REACTOME_Pathways_09.11.2016	0.5	1	0.88	1	[-1]	Group257	55.5556	20	[BCAP31, BIRC2, CASP3, CASP6, CASP7, CDH1, DBNL, DSP, FNTA, GAS2, MAPT, PLEC, PRKCD, PRKCQ, PTK2, ROCK1, STK24, TJP1, TJP2, VIM]
GO:0001669	Apoptotic execution phase	REACTOME_Pathways_09.11.2016	0.88	1	0.88	1	[-1]	Group257	50	25	[BCAP31, BIRC2, CASP3, CASP6, CASP7, CDH1, DBNL, DNM1L, DSP, FNTA, GAS2, HMGB1, HMGB2, KPNB1, MAPT, PAK2, PLEC, PRKCD, PRKCQ, PTK2, ROCK1, STK24, TJP1, TJP2, VIM]
GO:0000566	Membrane Trafficking	REACTOME_Pathways_09.11.2016	1.1e-07	3.5e-05	1.1e-07	2.6e-05	[-1]	Group258	59.1195	376	[AAK1, ACBD3, ACTB, ACTG1, ACTR2, ACTR3, AGFG1, AKT1, AKT2, AKT3, ALB, ALS2, AMPH, ANK1, ANK2, ANK3, ANKRD27, ANKRD28, AP1B1, AP1G1, AP1M1, AP1S2, AP2B1, AP2M1, AP2S1, AP3S1, AP4E1, APOA1, APOE, APOL1, APP, AREG, ARF4, ARF5, ARF6, ARFGAP2, ARFGAP3, ARFIP2, ARL1, ARPC2, ARPC5, ASPSCR1, BET1, BET1L, BICD2, BLOC1S3, BLOC1S4, BLOC1S6, C2CD5, CALM1, CALM2, CALM3, CALR, CBL, CCZ1, CD163, CD3D, CD3G, CD…
GO:0001319	Vesicle-mediated transport	REACTOME_Pathways_09.11.2016	1.1e-07	3.5e-05	1.1e-07	2.6e-05	[-1]	Group258	59.1195	376	[AAK1, ACBD3, ACTB, ACTG1, ACTR2, ACTR3, AGFG1, AKT1, AKT2, AKT3, ALB, ALS2, AMPH, ANK1, ANK2, ANK3, ANKRD27, ANKRD28, AP1B1, AP1G1, AP1M1, AP1S2, AP2B1, AP2M1, AP2S1, AP3S1, AP4E1, APOA1, APOE, APOL1, APP, AREG, ARF4, ARF5, ARF6, ARFGAP2, ARFGAP3, ARFIP2, ARL1, ARPC2, ARPC5, ASPSCR1, BET1, BET1L, BICD2, BLOC1S3, BLOC1S4, BLOC1S6, C2CD5, CALM1, CALM2, CALM3, CALR, CBL, CCZ1, CD163, CD3D, CD3G, CD…
GO:0001505	COPI-dependent Golgi-to-ER retrograde traffic	REACTOME_Pathways_09.11.2016	1.1e-07	3.5e-05	1.1e-07	2.6e-05	[-1]	Group258	59.1195	376	[AAK1, ACBD3, ACTB, ACTG1, ACTR2, ACTR3, AGFG1, AKT1, AKT2, AKT3, ALB, ALS2, AMPH, ANK1, ANK2, ANK3, ANKRD27, ANKRD28, AP1B1, AP1G1, AP1M1, AP1S2, AP2B1, AP2M1, AP2S1, AP3S1, AP4E1, APOA1, APOE, APOL1, APP, AREG, ARF4, ARF5, ARF6, ARFGAP2, ARFGAP3, ARFIP2, ARL1, ARPC2, ARPC5, ASPSCR1, BET1, BET1L, BICD2, BLOC1S3, BLOC1S4, BLOC1S6, C2CD5, CALM1, CALM2, CALM3, CALR, CBL, CCZ1, CD163, CD3D, CD3G, CD…
GO:0001509	Intra-Golgi and retrograde Golgi-to-ER traffic	REACTOME_Pathways_09.11.2016	1.1e-07	3.5e-05	1.1e-07	2.6e-05	[-1]	Group258	59.1195	376	[AAK1, ACBD3, ACTB, ACTG1, ACTR2, ACTR3, AGFG1, AKT1, AKT2, AKT3, ALB, ALS2, AMPH, ANK1, ANK2, ANK3, ANKRD27, ANKRD28, AP1B1, AP1G1, AP1M1, AP1S2, AP2B1, AP2M1, AP2S1, AP3S1, AP4E1, APOA1, APOE, APOL1, APP, AREG, ARF4, ARF5, ARF6, ARFGAP2, ARFGAP3, ARFIP2, ARL1, ARPC2, ARPC5, ASPSCR1, BET1, BET1L, BICD2, BLOC1S3, BLOC1S4, BLOC1S6, C2CD5, CALM1, CALM2, CALM3, CALR, CBL, CCZ1, CD163, CD3D, CD3G, CD…
GO:0001749	Golgi-to-ER retrograde transport	REACTOME_Pathways_09.11.2016	1.1e-07	3.5e-05	1.1e-07	2.6e-05	[-1]	Group258	59.1195	376	[AAK1, ACBD3, ACTB, ACTG1, ACTR2, ACTR3, AGFG1, AKT1, AKT2, AKT3, ALB, ALS2, AMPH, ANK1, ANK2, ANK3, ANKRD27, ANKRD28, AP1B1, AP1G1, AP1M1, AP1S2, AP2B1, AP2M1, AP2S1, AP3S1, AP4E1, APOA1, APOE, APOL1, APP, AREG, ARF4, ARF5, ARF6, ARFGAP2, ARFGAP3, ARFIP2, ARL1, ARPC2, ARPC5, ASPSCR1, BET1, BET1L, BICD2, BLOC1S3, BLOC1S4, BLOC1S6, C2CD5, CALM1, CALM2, CALM3, CALR, CBL, CCZ1, CD163, CD3D, CD3G, CD…
GO:0001756	Transcriptional regulation by the AP-2 (TFAP2) family of transcription factors	REACTOME_Pathways_09.11.2016	0.41	1	0.41	1	[-1]	Group259	56.7568	21	[APOE, CITED2, CITED4, CREBBP, DEK, EGFR, EP300, ERBB2, ESR1, HSPD1, KCTD15, KDM5B, KIT, MYBL2, MYC, NPM1, PITX2, SUMO1, VEGFA, YEATS4, YY1]
GO:0001762	Negative regulation of activity of TFAP2 (AP-2) family transcription factors	REACTOME_Pathways_09.11.2016	0.8	1	0.41	1	[-1]	Group259	43.75	7	[CITED2, HSPD1, KCTD15, MYBL2, NPM1, PITX2, SUMO1]
GO:0001763	TFAP2 (AP-2) family regulates transcription of other transcription factors	REACTOME_Pathways_09.11.2016	0.8	1	0.41	1	[-1]	Group259	43.75	7	[CITED2, HSPD1, KCTD15, MYBL2, NPM1, PITX2, SUMO1]
GO:0001764	Activation of the TFAP2 (AP-2) family of transcription factors	REACTOME_Pathways_09.11.2016	0.41	1	0.41	1	[-1]	Group259	56.7568	21	[APOE, CITED2, CITED4, CREBBP, DEK, EGFR, EP300, ERBB2, ESR1, HSPD1, KCTD15, KDM5B, KIT, MYBL2, MYC, NPM1, PITX2, SUMO1, VEGFA, YEATS4, YY1]
GO:0001769	TFAP2A acts as a transcriptional repressor during retinoic acid induced cell differentiation	REACTOME_Pathways_09.11.2016	0.8	1	0.41	1	[-1]	Group259	43.75	7	[CITED2, HSPD1, KCTD15, MYBL2, NPM1, PITX2, SUMO1]
GO:0001734	MET activates PI3K/AKT signaling	REACTOME_Pathways_09.11.2016	0.017	1	0.017	1	[-1]	Group260	77.7778	14	[ARF6, CRKL, DOCK7, GAB1, GGA3, MET, PIK3CA, PTPN11, RAB4A, RAC1, RAP1A, RAP1B, RAPGEF1, STAT3]
GO:0001757	MET activates PTPN11	REACTOME_Pathways_09.11.2016	0.017	1	0.017	1	[-1]	Group260	77.7778	14	[ARF6, CRKL, DOCK7, GAB1, GGA3, MET, PIK3CA, PTPN11, RAB4A, RAC1, RAP1A, RAP1B, RAPGEF1, STAT3]
GO:0001772	MET activates RAP1 and RAC1	REACTOME_Pathways_09.11.2016	0.017	1	0.017	1	[-1]	Group260	77.7778	14	[ARF6, CRKL, DOCK7, GAB1, GGA3, MET, PIK3CA, PTPN11, RAB4A, RAC1, RAP1A, RAP1B, RAPGEF1, STAT3]
GO:0001773	MET receptor recycling	REACTOME_Pathways_09.11.2016	0.017	1	0.017	1	[-1]	Group260	77.7778	14	[ARF6, CRKL, DOCK7, GAB1, GGA3, MET, PIK3CA, PTPN11, RAB4A, RAC1, RAP1A, RAP1B, RAPGEF1, STAT3]
GO:0001774	MET activates STAT3	REACTOME_Pathways_09.11.2016	0.017	1	0.017	1	[-1]	Group260	77.7778	14	[ARF6, CRKL, DOCK7, GAB1, GGA3, MET, PIK3CA, PTPN11, RAB4A, RAC1, RAP1A, RAP1B, RAPGEF1, STAT3]
GO:0000053	Neurotransmitter Receptor Binding And Downstream Transmission In The Postsynaptic Cell	REACTOME_Pathways_09.11.2016	0.023	1	0.023	1	[-1]	Group261	42.8153	146	[ABAT, ABCC8, ACHE, ACTN2, ADCY1, ADCY4, ADCY6, ADCY7, ADCY9, AKAP5, AKAP9, APBA1, ARHGEF9, ARL6IP5, BCHE, BEGAIN, BRAF, CACFD1, CACNA1A, CACNA2D1, CACNA2D2, CACNG4, CACNG8, CALM1, CALM2, CALM3, CAMK2A, CAMK2G, CAMK4, CAMKK1, CASK, CHRNA4, CHRND, COMT, CPLX1, CREB1, DBNL, DLG1, DLG3, DLGAP4, DNAJC5, EPB41L1, EPB41L2, EPB41L3, EPB41L5, FLOT2, GABRB1, GABRB2, GABRB3, GABRQ, GJC1, GJD2, GLS, GLUL, G…
GO:0000054	Transmission across Chemical Synapses	REACTOME_Pathways_09.11.2016	0.023	1	0.023	1	[-1]	Group261	42.8153	146	[ABAT, ABCC8, ACHE, ACTN2, ADCY1, ADCY4, ADCY6, ADCY7, ADCY9, AKAP5, AKAP9, APBA1, ARHGEF9, ARL6IP5, BCHE, BEGAIN, BRAF, CACFD1, CACNA1A, CACNA2D1, CACNA2D2, CACNG4, CACNG8, CALM1, CALM2, CALM3, CAMK2A, CAMK2G, CAMK4, CAMKK1, CASK, CHRNA4, CHRND, COMT, CPLX1, CREB1, DBNL, DLG1, DLG3, DLGAP4, DNAJC5, EPB41L1, EPB41L2, EPB41L3, EPB41L5, FLOT2, GABRB1, GABRB2, GABRB3, GABRQ, GJC1, GJD2, GLS, GLUL, G…
GO:0000055	Neuronal System	REACTOME_Pathways_09.11.2016	0.023	1	0.023	1	[-1]	Group261	42.8153	146	[ABAT, ABCC8, ACHE, ACTN2, ADCY1, ADCY4, ADCY6, ADCY7, ADCY9, AKAP5, AKAP9, APBA1, ARHGEF9, ARL6IP5, BCHE, BEGAIN, BRAF, CACFD1, CACNA1A, CACNA2D1, CACNA2D2, CACNG4, CACNG8, CALM1, CALM2, CALM3, CAMK2A, CAMK2G, CAMK4, CAMKK1, CASK, CHRNA4, CHRND, COMT, CPLX1, CREB1, DBNL, DLG1, DLG3, DLGAP4, DNAJC5, EPB41L1, EPB41L2, EPB41L3, EPB41L5, FLOT2, GABRB1, GABRB2, GABRB3, GABRQ, GJC1, GJD2, GLS, GLUL, G…
GO:0001830	GABA A (rho) receptor activation	REACTOME_Pathways_09.11.2016	0.023	1	0.023	1	[-1]	Group261	42.8153	146	[ABAT, ABCC8, ACHE, ACTN2, ADCY1, ADCY4, ADCY6, ADCY7, ADCY9, AKAP5, AKAP9, APBA1, ARHGEF9, ARL6IP5, BCHE, BEGAIN, BRAF, CACFD1, CACNA1A, CACNA2D1, CACNA2D2, CACNG4, CACNG8, CALM1, CALM2, CALM3, CAMK2A, CAMK2G, CAMK4, CAMKK1, CASK, CHRNA4, CHRND, COMT, CPLX1, CREB1, DBNL, DLG1, DLG3, DLGAP4, DNAJC5, EPB41L1, EPB41L2, EPB41L3, EPB41L5, FLOT2, GABRB1, GABRB2, GABRB3, GABRQ, GJC1, GJD2, GLS, GLUL, G…
GO:0001831	GABA receptor activation	REACTOME_Pathways_09.11.2016	0.023	1	0.023	1	[-1]	Group261	42.8153	146	[ABAT, ABCC8, ACHE, ACTN2, ADCY1, ADCY4, ADCY6, ADCY7, ADCY9, AKAP5, AKAP9, APBA1, ARHGEF9, ARL6IP5, BCHE, BEGAIN, BRAF, CACFD1, CACNA1A, CACNA2D1, CACNA2D2, CACNG4, CACNG8, CALM1, CALM2, CALM3, CAMK2A, CAMK2G, CAMK4, CAMKK1, CASK, CHRNA4, CHRND, COMT, CPLX1, CREB1, DBNL, DLG1, DLG3, DLGAP4, DNAJC5, EPB41L1, EPB41L2, EPB41L3, EPB41L5, FLOT2, GABRB1, GABRB2, GABRB3, GABRQ, GJC1, GJD2, GLS, GLUL, G…
GO:0000554	AKT phosphorylates targets in the cytosol	REACTOME_Pathways_09.11.2016	0.07	1	0.75	1	[-1]	Group262	68	17	[AKT1, AKT1S1, AKT2, AKT3, BAD, CDKN1B, CREB1, FOXO1, FOXO3, GSK3A, MAPKAP1, MDM2, MLST8, MTOR, PDPK1, RICTOR, RPS6KB2]
GO:0000555	AKT phosphorylates targets in the nucleus	REACTOME_Pathways_09.11.2016	0.035	1	0.75	1	[-1]	Group262	87.5	7	[AKT1, AKT2, AKT3, CREB1, FOXO1, FOXO3, RPS6KB2]
GO:0000628	Regulation of gene expression in beta cells	REACTOME_Pathways_09.11.2016	0.64	1	0.75	1	[-1]	Group262	42.1053	8	[AKT1, AKT2, AKT3, FOXA3, FOXO1, INS, MAFA, PAX6]
GO:0001260	IKBKB deficiency causes SCID	REACTOME_Pathways_09.11.2016	0.07	1	0.75	1	[-1]	Group262	68	17	[AKT1, AKT1S1, AKT2, AKT3, BAD, CDKN1B, CREB1, FOXO1, FOXO3, GSK3A, MAPKAP1, MDM2, MLST8, MTOR, PDPK1, RICTOR, RPS6KB2]
GO:0001378	Constitutive Signaling by AKT1 E17K in Cancer	REACTOME_Pathways_09.11.2016	0.07	1	0.75	1	[-1]	Group262	68	17	[AKT1, AKT1S1, AKT2, AKT3, BAD, CDKN1B, CREB1, FOXO1, FOXO3, GSK3A, MAPKAP1, MDM2, MLST8, MTOR, PDPK1, RICTOR, RPS6KB2]
GO:0000122	Potassium Channels	REACTOME_Pathways_09.11.2016	0.0018	0.55	0.0018	0.4	[-1]	Group263	33.3333	34	[ABCC8, GNB1, GNG10, GNG12, GNG7, GNG8, HCN2, KCNA5, KCNAB2, KCNAB3, KCNC3, KCNG1, KCNG3, KCNG4, KCNH3, KCNH8, KCNJ12, KCNJ15, KCNJ5, KCNK1, KCNK15, KCNK17, KCNK2, KCNK3, KCNK5, KCNMB2, KCNMB4, KCNN2, KCNN4, KCNQ2, KCNQ3, KCNQ5, KCNS3, KCNV2]
GO:0000123	Voltage gated Potassium channels	REACTOME_Pathways_09.11.2016	0.032	1	0.0018	0.4	[-1]	Group263	32.5581	14	[KCNA5, KCNAB2, KCNAB3, KCNC3, KCNG1, KCNG3, KCNG4, KCNH3, KCNH8, KCNQ2, KCNQ3, KCNQ5, KCNS3, KCNV2]
GO:0000124	Tandem pore domain potassium channels	REACTOME_Pathways_09.11.2016	0.0018	0.55	0.0018	0.4	[-1]	Group263	33.3333	34	[ABCC8, GNB1, GNG10, GNG12, GNG7, GNG8, HCN2, KCNA5, KCNAB2, KCNAB3, KCNC3, KCNG1, KCNG3, KCNG4, KCNH3, KCNH8, KCNJ12, KCNJ15, KCNJ5, KCNK1, KCNK15, KCNK17, KCNK2, KCNK3, KCNK5, KCNMB2, KCNMB4, KCNN2, KCNN4, KCNQ2, KCNQ3, KCNQ5, KCNS3, KCNV2]
GO:0000126	Tandem of pore domain in a weak inwardly rectifying K+ channels (TWIK)	REACTOME_Pathways_09.11.2016	0.0018	0.55	0.0018	0.4	[-1]	Group263	33.3333	34	[ABCC8, GNB1, GNG10, GNG12, GNG7, GNG8, HCN2, KCNA5, KCNAB2, KCNAB3, KCNC3, KCNG1, KCNG3, KCNG4, KCNH3, KCNH8, KCNJ12, KCNJ15, KCNJ5, KCNK1, KCNK15, KCNK17, KCNK2, KCNK3, KCNK5, KCNMB2, KCNMB4, KCNN2, KCNN4, KCNQ2, KCNQ3, KCNQ5, KCNS3, KCNV2]
GO:0001241	Phase 4 - resting membrane potential	REACTOME_Pathways_09.11.2016	0.0018	0.55	0.0018	0.4	[-1]	Group263	33.3333	34	[ABCC8, GNB1, GNG10, GNG12, GNG7, GNG8, HCN2, KCNA5, KCNAB2, KCNAB3, KCNC3, KCNG1, KCNG3, KCNG4, KCNH3, KCNH8, KCNJ12, KCNJ15, KCNJ5, KCNK1, KCNK15, KCNK17, KCNK2, KCNK3, KCNK5, KCNMB2, KCNMB4, KCNN2, KCNN4, KCNQ2, KCNQ3, KCNQ5, KCNS3, KCNV2]
GO:0000237	IRF3 mediated activation of type 1 IFN	REACTOME_Pathways_09.11.2016	0.44	1	0.27	1	[-1]	Group264	66.6667	4	[DTX4, NLRP4, TMEM173, ZBP1]
GO:0000443	STING mediated induction of host immune responses	REACTOME_Pathways_09.11.2016	0.47	1	0.27	1	[-1]	Group264	58.8235	10	[DTX4, IFI16, NLRC3, NLRP4, PRKDC, STAT6, TMEM173, TRIM21, XRCC6, ZBP1]
GO:0000444	Cytosolic sensors of pathogen-associated DNA	REACTOME_Pathways_09.11.2016	0.27	1	0.27	1	[-1]	Group264	55.8824	38	[AGER, APP, CREBBP, CTNNB1, DHX36, DTX4, EP300, HMGB1, IFI16, IRF7, LRRFIP1, NFKBIA, NFKBIB, NLRC3, NLRP4, POLR1C, POLR1D, POLR2E, POLR2F, POLR2H, POLR2K, POLR2L, POLR3A, POLR3E, POLR3G, PRKDC, RELA, RIPK1, RIPK3, S100A12, SAA1, STAT6, TICAM1, TMEM173, TRIM21, UBC, XRCC6, ZBP1]
GO:0000804	IRF3-mediated induction of type I IFN	REACTOME_Pathways_09.11.2016	0.47	1	0.27	1	[-1]	Group264	58.8235	10	[DTX4, IFI16, NLRC3, NLRP4, PRKDC, STAT6, TMEM173, TRIM21, XRCC6, ZBP1]
GO:0001626	RNA Polymerase III Chain Elongation	REACTOME_Pathways_09.11.2016	0.27	1	0.27	1	[-1]	Group264	55.8824	38	[AGER, APP, CREBBP, CTNNB1, DHX36, DTX4, EP300, HMGB1, IFI16, IRF7, LRRFIP1, NFKBIA, NFKBIB, NLRC3, NLRP4, POLR1C, POLR1D, POLR2E, POLR2F, POLR2H, POLR2K, POLR2L, POLR3A, POLR3E, POLR3G, PRKDC, RELA, RIPK1, RIPK3, S100A12, SAA1, STAT6, TICAM1, TMEM173, TRIM21, UBC, XRCC6, ZBP1]
GO:0000078	Signaling by NODAL	REACTOME_Pathways_09.11.2016	0.5	1	0.54	1	[-1]	Group265	40	8	[CFC1, FOXH1, FOXO3, GDF1, PCSK6, SMAD2, SMAD3, SMAD4]
GO:0000165	Regulation of signaling by NODAL	REACTOME_Pathways_09.11.2016	0.5	1	0.54	1	[-1]	Group265	40	8	[CFC1, FOXH1, FOXO3, GDF1, PCSK6, SMAD2, SMAD3, SMAD4]
GO:0000203	Signaling by Activin	REACTOME_Pathways_09.11.2016	1	1	0.54	1	[-1]	Group265	46.1538	6	[FOXH1, FST, INHBA, SMAD2, SMAD3, SMAD4]
GO:0000811	Loss of Function of SMAD4 in Cancer	REACTOME_Pathways_09.11.2016	0.11	1	0.54	1	[-1]	Group265	100	3	[SMAD2, SMAD3, SMAD4]
GO:0000815	SMAD4 MH2 Domain Mutants in Cancer	REACTOME_Pathways_09.11.2016	0.11	1	0.54	1	[-1]	Group265	100	3	[SMAD2, SMAD3, SMAD4]
GO:0000520	HDL-mediated lipid transport	REACTOME_Pathways_09.11.2016	0.43	1	0.31	1	[-1]	Group266	57.6923	15	[A2M, ABCG1, ALB, AMN, APOA1, APOE, HDLBP, MMAA, MMACHC, MMADHC, MUT, PRKACA, PRKACB, TCN2, ZDHHC8]
GO:0000807	Defects in cobalamin (B12) metabolism	REACTOME_Pathways_09.11.2016	0.43	1	0.31	1	[-1]	Group266	57.6923	15	[A2M, ABCG1, ALB, AMN, APOA1, APOE, HDLBP, MMAA, MMACHC, MMADHC, MUT, PRKACA, PRKACB, TCN2, ZDHHC8]
GO:0000821	Defective AMN causes hereditary megaloblastic anemia 1	REACTOME_Pathways_09.11.2016	0.43	1	0.31	1	[-1]	Group266	57.6923	15	[A2M, ABCG1, ALB, AMN, APOA1, APOE, HDLBP, MMAA, MMACHC, MMADHC, MUT, PRKACA, PRKACB, TCN2, ZDHHC8]
GO:0000822	Defective CUBN causes hereditary megaloblastic anemia 1	REACTOME_Pathways_09.11.2016	0.43	1	0.31	1	[-1]	Group266	57.6923	15	[A2M, ABCG1, ALB, AMN, APOA1, APOE, HDLBP, MMAA, MMACHC, MMADHC, MUT, PRKACA, PRKACB, TCN2, ZDHHC8]
GO:0000371	Signaling by TGF-beta Receptor Complex	REACTOME_Pathways_09.11.2016	0.058	1	0.058	1	[-1]	Group267	56.1798	100	[AKT1, AKT2, ARHGEF18, ASH2L, BCL9L, BTRC, CBL, CCNC, CCNT1, CDC73, CDK9, CREBBP, CTBP1, CTNNB1, CTNNBIP1, EP300, FKBP1A, H2AFV, H2AFX, H2AFZ, H3F3A, H3F3B, HDAC1, HIST1H2AC, HIST1H2AE, HIST1H2BC, HIST1H2BL, HIST1H3A, HIST1H3B, HIST1H3C, HIST1H3D, HIST1H3E, HIST1H3G, HIST1H3J, HIST1H4A, HIST1H4B, HIST1H4C, HIST1H4K, HIST2H2AA4, HIST2H3A, HIST2H3D, HIST3H2BB, HIST3H3, HIST4H4, JUNB, KMT2D, LEF1, L…
GO:0000572	Formation of the beta-catenin:TCF transactivating complex	REACTOME_Pathways_09.11.2016	0.058	1	0.058	1	[-1]	Group267	56.1798	100	[AKT1, AKT2, ARHGEF18, ASH2L, BCL9L, BTRC, CBL, CCNC, CCNT1, CDC73, CDK9, CREBBP, CTBP1, CTNNB1, CTNNBIP1, EP300, FKBP1A, H2AFV, H2AFX, H2AFZ, H3F3A, H3F3B, HDAC1, HIST1H2AC, HIST1H2AE, HIST1H2BC, HIST1H2BL, HIST1H3A, HIST1H3B, HIST1H3C, HIST1H3D, HIST1H3E, HIST1H3G, HIST1H3J, HIST1H4A, HIST1H4B, HIST1H4C, HIST1H4K, HIST2H2AA4, HIST2H3A, HIST2H3D, HIST3H2BB, HIST3H3, HIST4H4, JUNB, KMT2D, LEF1, L…
GO:0000688	Transcriptional activity of SMAD2/SMAD3:SMAD4 heterotrimer	REACTOME_Pathways_09.11.2016	0.058	1	0.058	1	[-1]	Group267	56.1798	100	[AKT1, AKT2, ARHGEF18, ASH2L, BCL9L, BTRC, CBL, CCNC, CCNT1, CDC73, CDK9, CREBBP, CTBP1, CTNNB1, CTNNBIP1, EP300, FKBP1A, H2AFV, H2AFX, H2AFZ, H3F3A, H3F3B, HDAC1, HIST1H2AC, HIST1H2AE, HIST1H2BC, HIST1H2BL, HIST1H3A, HIST1H3B, HIST1H3C, HIST1H3D, HIST1H3E, HIST1H3G, HIST1H3J, HIST1H4A, HIST1H4B, HIST1H4C, HIST1H4K, HIST2H2AA4, HIST2H3A, HIST2H3D, HIST3H2BB, HIST3H3, HIST4H4, JUNB, KMT2D, LEF1, L…
GO:0000690	SMAD2/SMAD3:SMAD4 heterotrimer regulates transcription	REACTOME_Pathways_09.11.2016	0.058	1	0.058	1	[-1]	Group267	56.1798	100	[AKT1, AKT2, ARHGEF18, ASH2L, BCL9L, BTRC, CBL, CCNC, CCNT1, CDC73, CDK9, CREBBP, CTBP1, CTNNB1, CTNNBIP1, EP300, FKBP1A, H2AFV, H2AFX, H2AFZ, H3F3A, H3F3B, HDAC1, HIST1H2AC, HIST1H2AE, HIST1H2BC, HIST1H2BL, HIST1H3A, HIST1H3B, HIST1H3C, HIST1H3D, HIST1H3E, HIST1H3G, HIST1H3J, HIST1H4A, HIST1H4B, HIST1H4C, HIST1H4K, HIST2H2AA4, HIST2H3A, HIST2H3D, HIST3H2BB, HIST3H3, HIST4H4, JUNB, KMT2D, LEF1, L…
GO:0000882	Deactivation of the beta-catenin transactivating complex	REACTOME_Pathways_09.11.2016	0.058	1	0.058	1	[-1]	Group267	56.1798	100	[AKT1, AKT2, ARHGEF18, ASH2L, BCL9L, BTRC, CBL, CCNC, CCNT1, CDC73, CDK9, CREBBP, CTBP1, CTNNB1, CTNNBIP1, EP300, FKBP1A, H2AFV, H2AFX, H2AFZ, H3F3A, H3F3B, HDAC1, HIST1H2AC, HIST1H2AE, HIST1H2BC, HIST1H2BL, HIST1H3A, HIST1H3B, HIST1H3C, HIST1H3D, HIST1H3E, HIST1H3G, HIST1H3J, HIST1H4A, HIST1H4B, HIST1H4C, HIST1H4K, HIST2H2AA4, HIST2H3A, HIST2H3D, HIST3H2BB, HIST3H3, HIST4H4, JUNB, KMT2D, LEF1, L…
GO:0000147	Amine Oxidase reactions	REACTOME_Pathways_09.11.2016	0.68	1	0.68	1	[-1]	Group268	60	3	[COMT, PAOX, SLC6A3]
GO:0000155	Biogenic amines are oxidatively deaminated to aldehydes by MAOA and MAOB	REACTOME_Pathways_09.11.2016	0.68	1	0.68	1	[-1]	Group268	60	3	[COMT, PAOX, SLC6A3]
GO:0000886	Enzymatic degradation of dopamine by COMT	REACTOME_Pathways_09.11.2016	0.68	1	0.68	1	[-1]	Group268	60	3	[COMT, PAOX, SLC6A3]
GO:0000887	Enzymatic degradation of Dopamine by monoamine oxidase	REACTOME_Pathways_09.11.2016	0.68	1	0.68	1	[-1]	Group268	60	3	[COMT, PAOX, SLC6A3]
GO:0000888	Dopamine clearance from the synaptic cleft	REACTOME_Pathways_09.11.2016	0.68	1	0.68	1	[-1]	Group268	60	3	[COMT, PAOX, SLC6A3]
GO:0000232	Gamma-carboxylation of protein precursors	REACTOME_Pathways_09.11.2016	0.72	1	0.72	1	[-1]	Group269	45.1613	14	[BGLAP, CTSG, F7, GAS6, GGCX, IGF1, IGFBP2, IGFBP3, IGFBP4, IGFBP5, KLK13, KLK2, MMP1, MMP2]
GO:0000233	Transport of gamma-carboxylated protein precursors from the endoplasmic reticulum to the Golgi apparatus	REACTOME_Pathways_09.11.2016	0.72	1	0.72	1	[-1]	Group269	45.1613	14	[BGLAP, CTSG, F7, GAS6, GGCX, IGF1, IGFBP2, IGFBP3, IGFBP4, IGFBP5, KLK13, KLK2, MMP1, MMP2]
GO:0000234	Removal of aminoterminal propeptides from gamma-carboxylated proteins	REACTOME_Pathways_09.11.2016	0.72	1	0.72	1	[-1]	Group269	45.1613	14	[BGLAP, CTSG, F7, GAS6, GGCX, IGF1, IGFBP2, IGFBP3, IGFBP4, IGFBP5, KLK13, KLK2, MMP1, MMP2]
GO:0000235	Gamma-carboxylation, transport, and amino-terminal cleavage of proteins	REACTOME_Pathways_09.11.2016	0.72	1	0.72	1	[-1]	Group269	45.1613	14	[BGLAP, CTSG, F7, GAS6, GGCX, IGF1, IGFBP2, IGFBP3, IGFBP4, IGFBP5, KLK13, KLK2, MMP1, MMP2]
GO:0000910	Regulation of Insulin-like Growth Factor (IGF) transport and uptake by Insulin-like Growth Factor Binding Proteins (IGFBPs)	REACTOME_Pathways_09.11.2016	0.72	1	0.72	1	[-1]	Group269	45.1613	14	[BGLAP, CTSG, F7, GAS6, GGCX, IGF1, IGFBP2, IGFBP3, IGFBP4, IGFBP5, KLK13, KLK2, MMP1, MMP2]
GO:0000334	Trafficking and processing of endosomal TLR	REACTOME_Pathways_09.11.2016	0.44	1	0.44	1	[-1]	Group270	60	9	[CNPY3, CTSB, CTSK, CTSL, HSP90B1, LGMN, TICAM1, TLR9, UNC93B1]
GO:0001255	TLR3 deficiency - HSE	REACTOME_Pathways_09.11.2016	0.44	1	0.44	1	[-1]	Group270	60	9	[CNPY3, CTSB, CTSK, CTSL, HSP90B1, LGMN, TICAM1, TLR9, UNC93B1]
GO:0001256	UNC93B1 deficiency - HSE	REACTOME_Pathways_09.11.2016	0.44	1	0.44	1	[-1]	Group270	60	9	[CNPY3, CTSB, CTSK, CTSL, HSP90B1, LGMN, TICAM1, TLR9, UNC93B1]
GO:0001258	TICAM1 deficiency - HSE	REACTOME_Pathways_09.11.2016	0.44	1	0.44	1	[-1]	Group270	60	9	[CNPY3, CTSB, CTSK, CTSL, HSP90B1, LGMN, TICAM1, TLR9, UNC93B1]
GO:0001259	TRAF3 deficiency - HSE	REACTOME_Pathways_09.11.2016	0.44	1	0.44	1	[-1]	Group270	60	9	[CNPY3, CTSB, CTSK, CTSL, HSP90B1, LGMN, TICAM1, TLR9, UNC93B1]
GO:0000556	Nuclear Events (kinase and transcription factor activation)	REACTOME_Pathways_09.11.2016	0.12	1	0.12	1	[-1]	Group271	60	30	[ATF1, CREB1, CREBBP, DUSP3, DUSP4, ELK1, EP300, FOS, ICAM2, ICAM3, JUN, KRAS, LYN, MAPK10, MAPK11, MAPK3, MAPK8, MAPKAPK2, NRAS, PAK1, PAK2, PPP2CA, PRKACA, PRKACB, RELA, RELB, RPS6KA1, RPS6KA2, RPS6KA3, RPS6KA5]
GO:0000558	ERK/MAPK targets	REACTOME_Pathways_09.11.2016	0.12	1	0.12	1	[-1]	Group271	60	30	[ATF1, CREB1, CREBBP, DUSP3, DUSP4, ELK1, EP300, FOS, ICAM2, ICAM3, JUN, KRAS, LYN, MAPK10, MAPK11, MAPK3, MAPK8, MAPKAPK2, NRAS, PAK1, PAK2, PPP2CA, PRKACA, PRKACB, RELA, RELB, RPS6KA1, RPS6KA2, RPS6KA3, RPS6KA5]
GO:0000564	CREB phosphorylation	REACTOME_Pathways_09.11.2016	0.12	1	0.12	1	[-1]	Group271	60	30	[ATF1, CREB1, CREBBP, DUSP3, DUSP4, ELK1, EP300, FOS, ICAM2, ICAM3, JUN, KRAS, LYN, MAPK10, MAPK11, MAPK3, MAPK8, MAPKAPK2, NRAS, PAK1, PAK2, PPP2CA, PRKACA, PRKACB, RELA, RELB, RPS6KA1, RPS6KA2, RPS6KA3, RPS6KA5]
GO:0001116	MAPK targets/ Nuclear events mediated by MAP kinases	REACTOME_Pathways_09.11.2016	0.12	1	0.12	1	[-1]	Group271	60	30	[ATF1, CREB1, CREBBP, DUSP3, DUSP4, ELK1, EP300, FOS, ICAM2, ICAM3, JUN, KRAS, LYN, MAPK10, MAPK11, MAPK3, MAPK8, MAPKAPK2, NRAS, PAK1, PAK2, PPP2CA, PRKACA, PRKACB, RELA, RELB, RPS6KA1, RPS6KA2, RPS6KA3, RPS6KA5]
GO:0001291	CD209 (DC-SIGN) signaling	REACTOME_Pathways_09.11.2016	0.12	1	0.12	1	[-1]	Group271	60	30	[ATF1, CREB1, CREBBP, DUSP3, DUSP4, ELK1, EP300, FOS, ICAM2, ICAM3, JUN, KRAS, LYN, MAPK10, MAPK11, MAPK3, MAPK8, MAPKAPK2, NRAS, PAK1, PAK2, PPP2CA, PRKACA, PRKACB, RELA, RELB, RPS6KA1, RPS6KA2, RPS6KA3, RPS6KA5]
GO:0000692	The retinoid cycle in cones (daylight vision)	REACTOME_Pathways_09.11.2016	1	1	0.036	1	[-1]	Group272	42.8571	3	[DHRS3, OPN1SW, RLBP1]
GO:0000716	Retinoid cycle disease events	REACTOME_Pathways_09.11.2016	1	1	0.036	1	[-1]	Group272	50	5	[NAPEPLD, OPN1SW, RBP4, RLBP1, STRA6]
GO:0000717	The canonical retinoid cycle in rods (twilight vision)	REACTOME_Pathways_09.11.2016	0.035	1	0.036	1	[-1]	Group272	26.087	6	[ABCA4, NAPEPLD, RBP4, RDH11, RLBP1, STRA6]
GO:0000725	Diseases associated with visual transduction	REACTOME_Pathways_09.11.2016	1	1	0.036	1	[-1]	Group272	50	5	[NAPEPLD, OPN1SW, RBP4, RLBP1, STRA6]
GO:0001504	Retinoid metabolism disease events	REACTOME_Pathways_09.11.2016	1	1	0.036	1	[-1]	Group272	50	5	[NAPEPLD, OPN1SW, RBP4, RLBP1, STRA6]
GO:0000214	Polo-like kinase mediated events	REACTOME_Pathways_09.11.2016	0.71	1	0.71	1	[-1]	Group273	44.8276	13	[CENPF, CSNK2A1, CSNK2A2, EP300, LIN37, LIN52, LIN9, MYBL2, NCAPD2, RBBP4, SMC2, SMC4, WEE1]
GO:0000221	Cyclin B2 mediated events	REACTOME_Pathways_09.11.2016	0.71	1	0.71	1	[-1]	Group273	44.8276	13	[CENPF, CSNK2A1, CSNK2A2, EP300, LIN37, LIN52, LIN9, MYBL2, NCAPD2, RBBP4, SMC2, SMC4, WEE1]
GO:0000728	Condensation of Prometaphase Chromosomes	REACTOME_Pathways_09.11.2016	0.71	1	0.71	1	[-1]	Group273	44.8276	13	[CENPF, CSNK2A1, CSNK2A2, EP300, LIN37, LIN52, LIN9, MYBL2, NCAPD2, RBBP4, SMC2, SMC4, WEE1]
GO:0000771	Activation of NIMA Kinases NEK9, NEK6, NEK7	REACTOME_Pathways_09.11.2016	0.71	1	0.71	1	[-1]	Group273	44.8276	13	[CENPF, CSNK2A1, CSNK2A2, EP300, LIN37, LIN52, LIN9, MYBL2, NCAPD2, RBBP4, SMC2, SMC4, WEE1]
GO:0001556	G2/M DNA replication checkpoint	REACTOME_Pathways_09.11.2016	0.71	1	0.71	1	[-1]	Group273	44.8276	13	[CENPF, CSNK2A1, CSNK2A2, EP300, LIN37, LIN52, LIN9, MYBL2, NCAPD2, RBBP4, SMC2, SMC4, WEE1]
GO:0000023	Activation of NOXA and translocation to mitochondria	REACTOME_Pathways_09.11.2016	0.28	1	0.28	1	[-1]	Group274	38.7097	12	[CABIN1, EP300, EP400, HMGA2, MAP2K6, PCBP4, PIN1, PIP4K2A, PIP4K2B, RB1, TFDP1, TMEM55B]
GO:0000736	Formation of Senescence-Associated Heterochromatin Foci (SAHF)	REACTOME_Pathways_09.11.2016	0.28	1	0.28	1	[-1]	Group274	38.7097	12	[CABIN1, EP300, EP400, HMGA2, MAP2K6, PCBP4, PIN1, PIP4K2A, PIP4K2B, RB1, TFDP1, TMEM55B]
GO:0001510	PI5P Regulates TP53 Acetylation	REACTOME_Pathways_09.11.2016	0.28	1	0.28	1	[-1]	Group274	38.7097	12	[CABIN1, EP300, EP400, HMGA2, MAP2K6, PCBP4, PIN1, PIP4K2A, PIP4K2B, RB1, TFDP1, TMEM55B]
GO:0001559	Transcriptional activation of p53 responsive genes	REACTOME_Pathways_09.11.2016	0.28	1	0.28	1	[-1]	Group274	38.7097	12	[CABIN1, EP300, EP400, HMGA2, MAP2K6, PCBP4, PIN1, PIP4K2A, PIP4K2B, RB1, TFDP1, TMEM55B]
GO:0001569	Transcriptional activation of cell cycle inhibitor p21	REACTOME_Pathways_09.11.2016	0.28	1	0.28	1	[-1]	Group274	38.7097	12	[CABIN1, EP300, EP400, HMGA2, MAP2K6, PCBP4, PIN1, PIP4K2A, PIP4K2B, RB1, TFDP1, TMEM55B]
GO:0000289	Activation of AKT2	REACTOME_Pathways_09.11.2016	0.016	1	0.016	1	[-1]	Group275	62.3529	53	[ADRA2B, ADRA2C, AKT1, AKT2, AKT3, APBB1IP, BCAR1, CALM1, CALM2, CALM3, CAV1, CDH5, COL1A1, COL1A2, CSK, CTNNA1, CTNND1, FN1, GP1BA, HSP90AA1, ITGA2B, JUP, LYN, MAPKAP1, MLST8, MTOR, NOS3, PAK1, PAK2, PDPK1, PPP2CA, PPP2R5B, PPP2R5C, PPP2R5E, PTK2, PTPN1, PTPN11, RAC1, RAP1A, RAP1B, RAPGEF4, RASGRP2, RICTOR, RPS6KA1, RPS6KA2, RPS6KA3, SHC1, THEM4, TLN1, VAV1, VAV2, VWF, YES1]
GO:0000847	Integrin alphaIIb beta3 signaling	REACTOME_Pathways_09.11.2016	0.016	1	0.016	1	[-1]	Group275	62.3529	53	[ADRA2B, ADRA2C, AKT1, AKT2, AKT3, APBB1IP, BCAR1, CALM1, CALM2, CALM3, CAV1, CDH5, COL1A1, COL1A2, CSK, CTNNA1, CTNND1, FN1, GP1BA, HSP90AA1, ITGA2B, JUP, LYN, MAPKAP1, MLST8, MTOR, NOS3, PAK1, PAK2, PDPK1, PPP2CA, PPP2R5B, PPP2R5C, PPP2R5E, PTK2, PTPN1, PTPN11, RAC1, RAP1A, RAP1B, RAPGEF4, RASGRP2, RICTOR, RPS6KA1, RPS6KA2, RPS6KA3, SHC1, THEM4, TLN1, VAV1, VAV2, VWF, YES1]
GO:0000929	CTLA4 inhibitory signaling	REACTOME_Pathways_09.11.2016	0.016	1	0.016	1	[-1]	Group275	62.3529	53	[ADRA2B, ADRA2C, AKT1, AKT2, AKT3, APBB1IP, BCAR1, CALM1, CALM2, CALM3, CAV1, CDH5, COL1A1, COL1A2, CSK, CTNNA1, CTNND1, FN1, GP1BA, HSP90AA1, ITGA2B, JUP, LYN, MAPKAP1, MLST8, MTOR, NOS3, PAK1, PAK2, PDPK1, PPP2CA, PPP2R5B, PPP2R5C, PPP2R5E, PTK2, PTPN1, PTPN11, RAC1, RAP1A, RAP1B, RAPGEF4, RASGRP2, RICTOR, RPS6KA1, RPS6KA2, RPS6KA3, SHC1, THEM4, TLN1, VAV1, VAV2, VWF, YES1]
GO:0001088	RSK activation	REACTOME_Pathways_09.11.2016	0.016	1	0.016	1	[-1]	Group275	62.3529	53	[ADRA2B, ADRA2C, AKT1, AKT2, AKT3, APBB1IP, BCAR1, CALM1, CALM2, CALM3, CAV1, CDH5, COL1A1, COL1A2, CSK, CTNNA1, CTNND1, FN1, GP1BA, HSP90AA1, ITGA2B, JUP, LYN, MAPKAP1, MLST8, MTOR, NOS3, PAK1, PAK2, PDPK1, PPP2CA, PPP2R5B, PPP2R5C, PPP2R5E, PTK2, PTPN1, PTPN11, RAC1, RAP1A, RAP1B, RAPGEF4, RASGRP2, RICTOR, RPS6KA1, RPS6KA2, RPS6KA3, SHC1, THEM4, TLN1, VAV1, VAV2, VWF, YES1]
GO:0001177	VEGFR2 mediated vascular permeability	REACTOME_Pathways_09.11.2016	0.016	1	0.016	1	[-1]	Group275	62.3529	53	[ADRA2B, ADRA2C, AKT1, AKT2, AKT3, APBB1IP, BCAR1, CALM1, CALM2, CALM3, CAV1, CDH5, COL1A1, COL1A2, CSK, CTNNA1, CTNND1, FN1, GP1BA, HSP90AA1, ITGA2B, JUP, LYN, MAPKAP1, MLST8, MTOR, NOS3, PAK1, PAK2, PDPK1, PPP2CA, PPP2R5B, PPP2R5C, PPP2R5E, PTK2, PTPN1, PTPN11, RAC1, RAP1A, RAP1B, RAPGEF4, RASGRP2, RICTOR, RPS6KA1, RPS6KA2, RPS6KA3, SHC1, THEM4, TLN1, VAV1, VAV2, VWF, YES1]
GO:0001683	Platelet Aggregation (Plug Formation)	REACTOME_Pathways_09.11.2016	0.016	1	0.016	1	[-1]	Group275	62.3529	53	[ADRA2B, ADRA2C, AKT1, AKT2, AKT3, APBB1IP, BCAR1, CALM1, CALM2, CALM3, CAV1, CDH5, COL1A1, COL1A2, CSK, CTNNA1, CTNND1, FN1, GP1BA, HSP90AA1, ITGA2B, JUP, LYN, MAPKAP1, MLST8, MTOR, NOS3, PAK1, PAK2, PDPK1, PPP2CA, PPP2R5B, PPP2R5C, PPP2R5E, PTK2, PTPN1, PTPN11, RAC1, RAP1A, RAP1B, RAPGEF4, RASGRP2, RICTOR, RPS6KA1, RPS6KA2, RPS6KA3, SHC1, THEM4, TLN1, VAV1, VAV2, VWF, YES1]
GO:0001583	Propionyl-CoA catabolism	REACTOME_Pathways_09.11.2016	0.027	1	0.031	1	[-1]	Group276	100	5	[MCEE, MMAA, MUT, PCCA, PCCB]
GO:0001694	mitochondrial fatty acid beta-oxidation of saturated fatty acids	REACTOME_Pathways_09.11.2016	0.57	1	0.031	1	[-1]	Group276	58.3333	7	[ACADM, ACADVL, DECR1, ECHS1, HADH, HADHA, HADHB]
GO:0001695	mitochondrial fatty acid beta-oxidation of unsaturated fatty acids	REACTOME_Pathways_09.11.2016	0.57	1	0.031	1	[-1]	Group276	58.3333	7	[ACADM, ACADVL, DECR1, ECHS1, HADH, HADHA, HADHB]
GO:0001696	Mitochondrial Fatty Acid Beta-Oxidation	REACTOME_Pathways_09.11.2016	0.031	1	0.031	1	[-1]	Group276	72.7273	16	[ACAA2, ACAD10, ACADM, ACADVL, DECR1, ECHS1, HADH, HADHA, HADHB, MCAT, MCEE, MMAA, MUT, NDUFAB1, PCCA, PCCB]
GO:0001699	Beta oxidation of decanoyl-CoA to octanoyl-CoA-CoA	REACTOME_Pathways_09.11.2016	0.57	1	0.031	1	[-1]	Group276	58.3333	7	[ACADM, ACADVL, DECR1, ECHS1, HADH, HADHA, HADHB]
GO:0001700	Beta oxidation of octanoyl-CoA to hexanoyl-CoA	REACTOME_Pathways_09.11.2016	0.57	1	0.031	1	[-1]	Group276	58.3333	7	[ACADM, ACADVL, DECR1, ECHS1, HADH, HADHA, HADHB]
GO:0000442	EGFR downregulation	REACTOME_Pathways_09.11.2016	0.0017	0.51	0.0015	0.33	[-1]	Group277	65.9091	58	[ARF6, ARHGEF7, CBL, CDC42, COL11A1, COL11A2, COL1A1, COL1A2, COL27A1, COL2A1, COL3A1, COL5A1, COL5A2, CRKL, DOCK7, EGFR, EPN1, EPS15, EPS15L1, FN1, GAB1, GGA3, HGS, HPN, ITGB1, KRAS, LAMA4, LAMA5, LAMB1, LAMB2, LAMB3, LAMC1, LAMC3, MET, NRAS, PIK3CA, PTK2, PTPN1, PTPN11, PTPN12, PTPN2, PTPN3, PTPRK, RAB4A, RAC1, RANBP10, RANBP9, RAP1A, RAP1B, RAPGEF1, SH3GL1, SH3KBP1, SPRY1, STAM, STAM2, STAT3, …
GO:0000776	Laminin interactions	REACTOME_Pathways_09.11.2016	0.022	1	0.0015	0.33	[-1]	Group277	64.2857	36	[COL11A1, COL11A2, COL18A1, COL1A1, COL1A2, COL27A1, COL2A1, COL3A1, COL5A1, COL5A2, COL7A1, CRKL, DOCK7, FN1, GAB1, HSPG2, ITGA6, ITGA7, ITGAV, ITGB1, ITGB4, LAMA4, LAMA5, LAMB1, LAMB2, LAMB3, LAMC1, LAMC3, MET, NID1, NID2, PTK2, RAC1, RAP1A, RAP1B, RAPGEF1]
GO:0001496	Signaling by MET	REACTOME_Pathways_09.11.2016	0.0017	0.51	0.0015	0.33	[-1]	Group277	65.9091	58	[ARF6, ARHGEF7, CBL, CDC42, COL11A1, COL11A2, COL1A1, COL1A2, COL27A1, COL2A1, COL3A1, COL5A1, COL5A2, CRKL, DOCK7, EGFR, EPN1, EPS15, EPS15L1, FN1, GAB1, GGA3, HGS, HPN, ITGB1, KRAS, LAMA4, LAMA5, LAMB1, LAMB2, LAMB3, LAMC1, LAMC3, MET, NRAS, PIK3CA, PTK2, PTPN1, PTPN11, PTPN12, PTPN2, PTPN3, PTPRK, RAB4A, RAC1, RANBP10, RANBP9, RAP1A, RAP1B, RAPGEF1, SH3GL1, SH3KBP1, SPRY1, STAM, STAM2, STAT3, …
GO:0001498	Negative regulation of MET activity	REACTOME_Pathways_09.11.2016	0.0017	0.51	0.0015	0.33	[-1]	Group277	65.9091	58	[ARF6, ARHGEF7, CBL, CDC42, COL11A1, COL11A2, COL1A1, COL1A2, COL27A1, COL2A1, COL3A1, COL5A1, COL5A2, CRKL, DOCK7, EGFR, EPN1, EPS15, EPS15L1, FN1, GAB1, GGA3, HGS, HPN, ITGB1, KRAS, LAMA4, LAMA5, LAMB1, LAMB2, LAMB3, LAMC1, LAMC3, MET, NRAS, PIK3CA, PTK2, PTPN1, PTPN11, PTPN12, PTPN2, PTPN3, PTPRK, RAB4A, RAC1, RANBP10, RANBP9, RAP1A, RAP1B, RAPGEF1, SH3GL1, SH3KBP1, SPRY1, STAM, STAM2, STAT3, …
GO:0001770	MET activates PTK2 signaling	REACTOME_Pathways_09.11.2016	0.022	1	0.0015	0.33	[-1]	Group277	64.2857	36	[COL11A1, COL11A2, COL18A1, COL1A1, COL1A2, COL27A1, COL2A1, COL3A1, COL5A1, COL5A2, COL7A1, CRKL, DOCK7, FN1, GAB1, HSPG2, ITGA6, ITGA7, ITGAV, ITGB1, ITGB4, LAMA4, LAMA5, LAMB1, LAMB2, LAMB3, LAMC1, LAMC3, MET, NID1, NID2, PTK2, RAC1, RAP1A, RAP1B, RAPGEF1]
GO:0001775	MET promotes cell motility	REACTOME_Pathways_09.11.2016	0.022	1	0.0015	0.33	[-1]	Group277	64.2857	36	[COL11A1, COL11A2, COL18A1, COL1A1, COL1A2, COL27A1, COL2A1, COL3A1, COL5A1, COL5A2, COL7A1, CRKL, DOCK7, FN1, GAB1, HSPG2, ITGA6, ITGA7, ITGAV, ITGB1, ITGB4, LAMA4, LAMA5, LAMB1, LAMB2, LAMB3, LAMC1, LAMC3, MET, NID1, NID2, PTK2, RAC1, RAP1A, RAP1B, RAPGEF1]
GO:0000000	Interleukin-6 signaling	REACTOME_Pathways_09.11.2016	1	1	1	1	[-1]	Group278	48.4211	46	[ADAR, BST2, CBL, CRLF1, EGR1, HLA-A, HLA-B, HLA-C, HLA-E, HLA-F, IFI6, IFIT1, IFITM1, IFITM2, IFITM3, IFNA4, IFNAR1, IFNGR1, IFNGR2, IL11, IL6, IL6ST, IP6K2, IRF5, IRF7, ISG20, JAK2, LIFR, MX2, OAS1, OAS2, OAS3, PIAS1, PTPN1, PTPN11, PTPN6, RNASEL, SAMHD1, SOCS1, SOCS3, STAP2, STAT2, STAT3, SUMO1, USP18, XAF1]
GO:0001449	Interleukin-6 family signaling	REACTOME_Pathways_09.11.2016	1	1	1	1	[-1]	Group278	48.4211	46	[ADAR, BST2, CBL, CRLF1, EGR1, HLA-A, HLA-B, HLA-C, HLA-E, HLA-F, IFI6, IFIT1, IFITM1, IFITM2, IFITM3, IFNA4, IFNAR1, IFNGR1, IFNGR2, IL11, IL6, IL6ST, IP6K2, IRF5, IRF7, ISG20, JAK2, LIFR, MX2, OAS1, OAS2, OAS3, PIAS1, PTPN1, PTPN11, PTPN6, RNASEL, SAMHD1, SOCS1, SOCS3, STAP2, STAT2, STAT3, SUMO1, USP18, XAF1]
GO:0001714	Regulation of IFNG signaling	REACTOME_Pathways_09.11.2016	1	1	1	1	[-1]	Group278	48.4211	46	[ADAR, BST2, CBL, CRLF1, EGR1, HLA-A, HLA-B, HLA-C, HLA-E, HLA-F, IFI6, IFIT1, IFITM1, IFITM2, IFITM3, IFNA4, IFNAR1, IFNGR1, IFNGR2, IL11, IL6, IL6ST, IP6K2, IRF5, IRF7, ISG20, JAK2, LIFR, MX2, OAS1, OAS2, OAS3, PIAS1, PTPN1, PTPN11, PTPN6, RNASEL, SAMHD1, SOCS1, SOCS3, STAP2, STAT2, STAT3, SUMO1, USP18, XAF1]
GO:0001729	PTK6 Activates STAT3	REACTOME_Pathways_09.11.2016	1	1	1	1	[-1]	Group278	48.4211	46	[ADAR, BST2, CBL, CRLF1, EGR1, HLA-A, HLA-B, HLA-C, HLA-E, HLA-F, IFI6, IFIT1, IFITM1, IFITM2, IFITM3, IFNA4, IFNAR1, IFNGR1, IFNGR2, IL11, IL6, IL6ST, IP6K2, IRF5, IRF7, ISG20, JAK2, LIFR, MX2, OAS1, OAS2, OAS3, PIAS1, PTPN1, PTPN11, PTPN6, RNASEL, SAMHD1, SOCS1, SOCS3, STAP2, STAT2, STAT3, SUMO1, USP18, XAF1]
GO:0001783	Interferon alpha/beta signaling	REACTOME_Pathways_09.11.2016	1	1	1	1	[-1]	Group278	48.4211	46	[ADAR, BST2, CBL, CRLF1, EGR1, HLA-A, HLA-B, HLA-C, HLA-E, HLA-F, IFI6, IFIT1, IFITM1, IFITM2, IFITM3, IFNA4, IFNAR1, IFNGR1, IFNGR2, IL11, IL6, IL6ST, IP6K2, IRF5, IRF7, ISG20, JAK2, LIFR, MX2, OAS1, OAS2, OAS3, PIAS1, PTPN1, PTPN11, PTPN6, RNASEL, SAMHD1, SOCS1, SOCS3, STAP2, STAT2, STAT3, SUMO1, USP18, XAF1]
GO:0001787	Regulation of IFNA signaling	REACTOME_Pathways_09.11.2016	1	1	1	1	[-1]	Group278	48.4211	46	[ADAR, BST2, CBL, CRLF1, EGR1, HLA-A, HLA-B, HLA-C, HLA-E, HLA-F, IFI6, IFIT1, IFITM1, IFITM2, IFITM3, IFNA4, IFNAR1, IFNGR1, IFNGR2, IL11, IL6, IL6ST, IP6K2, IRF5, IRF7, ISG20, JAK2, LIFR, MX2, OAS1, OAS2, OAS3, PIAS1, PTPN1, PTPN11, PTPN6, RNASEL, SAMHD1, SOCS1, SOCS3, STAP2, STAT2, STAT3, SUMO1, USP18, XAF1]
GO:0000247	Integration of provirus	REACTOME_Pathways_09.11.2016	0.6	1	0.6	1	[-1]	Group279	57.1429	8	[CCR5, CD4, CXCR4, LIG1, PPIA, PSIP1, XRCC4, XRCC6]
GO:0000248	Early Phase of HIV Life Cycle	REACTOME_Pathways_09.11.2016	0.6	1	0.6	1	[-1]	Group279	57.1429	8	[CCR5, CD4, CXCR4, LIG1, PPIA, PSIP1, XRCC4, XRCC6]
GO:0000281	2-LTR circle formation	REACTOME_Pathways_09.11.2016	0.6	1	0.6	1	[-1]	Group279	57.1429	8	[CCR5, CD4, CXCR4, LIG1, PPIA, PSIP1, XRCC4, XRCC6]
GO:0000403	Integration of viral DNA into host genomic DNA	REACTOME_Pathways_09.11.2016	0.6	1	0.6	1	[-1]	Group279	57.1429	8	[CCR5, CD4, CXCR4, LIG1, PPIA, PSIP1, XRCC4, XRCC6]
GO:0000419	Autointegration results in viral DNA circles	REACTOME_Pathways_09.11.2016	0.6	1	0.6	1	[-1]	Group279	57.1429	8	[CCR5, CD4, CXCR4, LIG1, PPIA, PSIP1, XRCC4, XRCC6]
GO:0000431	APOBEC3G mediated resistance to HIV-1 infection	REACTOME_Pathways_09.11.2016	0.6	1	0.6	1	[-1]	Group279	57.1429	8	[CCR5, CD4, CXCR4, LIG1, PPIA, PSIP1, XRCC4, XRCC6]
GO:0000005	PKB-mediated events	REACTOME_Pathways_09.11.2016	0.0012	0.37	0.0034	0.71	[-1]	Group280	68.0556	49	[AKT1, AKT1S1, AKT2, CAB39, CAB39L, EEF2K, EIF4B, EIF4E, EIF4EBP1, FGF1, FGF2, FGF22, FGF7, GAB1, IRS1, IRS2, LAMTOR2, LAMTOR3, LAMTOR4, LAMTOR5, MLST8, MTOR, PDE3B, PDPK1, PIK3C3, PIK3CA, PIK3R2, PIK3R4, PPM1A, PRKAA1, PRKAA2, PRKAB2, PRKAG1, PRKAG2, PRKAG3, PTPN11, RHEB, RPS6, RPS6KB1, RPTOR, RRAGA, RRAGB, RRAGD, STK11, STRADB, THEM4, TLR9, TSC1, YWHAB]
GO:0000006	PI3K Cascade	REACTOME_Pathways_09.11.2016	0.0012	0.37	0.0034	0.71	[-1]	Group280	68.0556	49	[AKT1, AKT1S1, AKT2, CAB39, CAB39L, EEF2K, EIF4B, EIF4E, EIF4EBP1, FGF1, FGF2, FGF22, FGF7, GAB1, IRS1, IRS2, LAMTOR2, LAMTOR3, LAMTOR4, LAMTOR5, MLST8, MTOR, PDE3B, PDPK1, PIK3C3, PIK3CA, PIK3R2, PIK3R4, PPM1A, PRKAA1, PRKAA2, PRKAB2, PRKAG1, PRKAG2, PRKAG3, PTPN11, RHEB, RPS6, RPS6KB1, RPTOR, RRAGA, RRAGB, RRAGD, STK11, STRADB, THEM4, TLR9, TSC1, YWHAB]
GO:0000261	Macroautophagy	REACTOME_Pathways_09.11.2016	0.0045	1	0.0034	0.71	[-1]	Group280	65.7534	48	[AMBRA1, ATG12, ATG13, ATG14, ATG4B, ATG4C, ATG4D, ATG5, CAB39, CAB39L, CHMP2B, CHMP4B, CHMP7, DYNLL1, DYNLL2, GABARAP, GABARAPL1, GABARAPL2, LAMTOR2, LAMTOR3, LAMTOR4, LAMTOR5, MAP1LC3A, MAP1LC3B, MLST8, MTMR14, MTOR, PIK3C3, PIK3R4, PPM1A, PRKAA1, PRKAA2, PRKAB2, PRKAG1, PRKAG2, PRKAG3, RB1CC1, RHEB, RPTOR, RRAGA, RRAGB, RRAGD, STK11, STRADB, TSC1, UVRAG, WDR45B, WIPI1]
GO:0000290	mTOR signalling	REACTOME_Pathways_09.11.2016	0.0012	0.37	0.0034	0.71	[-1]	Group280	68.0556	49	[AKT1, AKT1S1, AKT2, CAB39, CAB39L, EEF2K, EIF4B, EIF4E, EIF4EBP1, FGF1, FGF2, FGF22, FGF7, GAB1, IRS1, IRS2, LAMTOR2, LAMTOR3, LAMTOR4, LAMTOR5, MLST8, MTOR, PDE3B, PDPK1, PIK3C3, PIK3CA, PIK3R2, PIK3R4, PPM1A, PRKAA1, PRKAA2, PRKAB2, PRKAG1, PRKAG2, PRKAG3, PTPN11, RHEB, RPS6, RPS6KB1, RPTOR, RRAGA, RRAGB, RRAGD, STK11, STRADB, THEM4, TLR9, TSC1, YWHAB]
GO:0000306	mTORC1-mediated signalling	REACTOME_Pathways_09.11.2016	0.0012	0.37	0.0034	0.71	[-1]	Group280	68.0556	49	[AKT1, AKT1S1, AKT2, CAB39, CAB39L, EEF2K, EIF4B, EIF4E, EIF4EBP1, FGF1, FGF2, FGF22, FGF7, GAB1, IRS1, IRS2, LAMTOR2, LAMTOR3, LAMTOR4, LAMTOR5, MLST8, MTOR, PDE3B, PDPK1, PIK3C3, PIK3CA, PIK3R2, PIK3R4, PPM1A, PRKAA1, PRKAA2, PRKAB2, PRKAG1, PRKAG2, PRKAG3, PTPN11, RHEB, RPS6, RPS6KB1, RPTOR, RRAGA, RRAGB, RRAGD, STK11, STRADB, THEM4, TLR9, TSC1, YWHAB]
GO:0000901	Energy dependent regulation of mTOR by LKB1-AMPK	REACTOME_Pathways_09.11.2016	0.0045	1	0.0034	0.71	[-1]	Group280	65.7534	48	[AMBRA1, ATG12, ATG13, ATG14, ATG4B, ATG4C, ATG4D, ATG5, CAB39, CAB39L, CHMP2B, CHMP4B, CHMP7, DYNLL1, DYNLL2, GABARAP, GABARAPL1, GABARAPL2, LAMTOR2, LAMTOR3, LAMTOR4, LAMTOR5, MAP1LC3A, MAP1LC3B, MLST8, MTMR14, MTOR, PIK3C3, PIK3R4, PPM1A, PRKAA1, PRKAA2, PRKAB2, PRKAG1, PRKAG2, PRKAG3, RB1CC1, RHEB, RPTOR, RRAGA, RRAGB, RRAGD, STK11, STRADB, TSC1, UVRAG, WDR45B, WIPI1]
GO:0000170	Alpha-defensins	REACTOME_Pathways_09.11.2016	0.14	1	0.13	1	[-1]	Group281	61.5385	24	[CCR5, CD274, CD3D, CD3E, CD3G, CD4, CSK, CXCR4, HLA-DPA1, HLA-DPB1, HLA-DQA1, HLA-DQB1, HLA-DQB2, HLA-DRA, HLA-DRB1, HLA-DRB3, HLA-DRB4, HLA-DRB5, PDCD1LG2, PPIA, PTPN11, PTPN22, PTPN6, PTPRC]
GO:0000379	Binding and entry of HIV virion	REACTOME_Pathways_09.11.2016	0.14	1	0.13	1	[-1]	Group281	61.5385	24	[CCR5, CD274, CD3D, CD3E, CD3G, CD4, CSK, CXCR4, HLA-DPA1, HLA-DPB1, HLA-DQA1, HLA-DQB1, HLA-DQB2, HLA-DRA, HLA-DRB1, HLA-DRB3, HLA-DRB4, HLA-DRB5, PDCD1LG2, PPIA, PTPN11, PTPN22, PTPN6, PTPRC]
GO:0000587	Phosphorylation of CD3 and TCR zeta chains	REACTOME_Pathways_09.11.2016	0.14	1	0.13	1	[-1]	Group281	61.5385	24	[CCR5, CD274, CD3D, CD3E, CD3G, CD4, CSK, CXCR4, HLA-DPA1, HLA-DPB1, HLA-DQA1, HLA-DQB1, HLA-DQB2, HLA-DRA, HLA-DRB1, HLA-DRB3, HLA-DRB4, HLA-DRB5, PDCD1LG2, PPIA, PTPN11, PTPN22, PTPN6, PTPRC]
GO:0000588	Translocation of ZAP-70 to Immunological synapse	REACTOME_Pathways_09.11.2016	0.14	1	0.13	1	[-1]	Group281	61.5385	24	[CCR5, CD274, CD3D, CD3E, CD3G, CD4, CSK, CXCR4, HLA-DPA1, HLA-DPB1, HLA-DQA1, HLA-DQB1, HLA-DQB2, HLA-DRA, HLA-DRB1, HLA-DRB3, HLA-DRB4, HLA-DRB5, PDCD1LG2, PPIA, PTPN11, PTPN22, PTPN6, PTPRC]
GO:0000589	Generation of second messenger molecules	REACTOME_Pathways_09.11.2016	0.032	1	0.13	1	[-1]	Group281	68.75	22	[CD3D, CD3E, CD3G, CD4, ENAH, EVL, HLA-DPA1, HLA-DPB1, HLA-DQA1, HLA-DQB1, HLA-DQB2, HLA-DRA, HLA-DRB1, HLA-DRB3, HLA-DRB4, HLA-DRB5, LAT, NCK1, PAK1, PAK2, VASP, WAS]
GO:0000934	PD-1 signaling	REACTOME_Pathways_09.11.2016	0.14	1	0.13	1	[-1]	Group281	61.5385	24	[CCR5, CD274, CD3D, CD3E, CD3G, CD4, CSK, CXCR4, HLA-DPA1, HLA-DPB1, HLA-DQA1, HLA-DQB1, HLA-DQB2, HLA-DRA, HLA-DRB1, HLA-DRB3, HLA-DRB4, HLA-DRB5, PDCD1LG2, PPIA, PTPN11, PTPN22, PTPN6, PTPRC]
GO:0000499	Synthesis of bile acids and bile salts	REACTOME_Pathways_09.11.2016	0.58	1	0.58	1	[-1]	Group282	52.8302	28	[ABCC3, ABCD1, ACAA1, ACOT8, AKR1C1, AKR1C3, AKR1C4, ALB, CRAT, CYP27A1, CYP39A1, ELOVL1, ELOVL3, ELOVL5, FABP6, FADS1, FADS2, HSD17B4, HSD3B7, NCOA2, OSBPL1A, OSBPL2, OSBPL3, OSBPL6, OSBPL7, OSBPL9, PTGIS, SCP2]
GO:0000505	Synthesis of bile acids and bile salts via 7alpha-hydroxycholesterol	REACTOME_Pathways_09.11.2016	0.58	1	0.58	1	[-1]	Group282	52.8302	28	[ABCC3, ABCD1, ACAA1, ACOT8, AKR1C1, AKR1C3, AKR1C4, ALB, CRAT, CYP27A1, CYP39A1, ELOVL1, ELOVL3, ELOVL5, FABP6, FADS1, FADS2, HSD17B4, HSD3B7, NCOA2, OSBPL1A, OSBPL2, OSBPL3, OSBPL6, OSBPL7, OSBPL9, PTGIS, SCP2]
GO:0000518	Bile acid and bile salt metabolism	REACTOME_Pathways_09.11.2016	0.58	1	0.58	1	[-1]	Group282	52.8302	28	[ABCC3, ABCD1, ACAA1, ACOT8, AKR1C1, AKR1C3, AKR1C4, ALB, CRAT, CYP27A1, CYP39A1, ELOVL1, ELOVL3, ELOVL5, FABP6, FADS1, FADS2, HSD17B4, HSD3B7, NCOA2, OSBPL1A, OSBPL2, OSBPL3, OSBPL6, OSBPL7, OSBPL9, PTGIS, SCP2]
GO:0000608	alpha-linolenic (omega3) and linoleic (omega6) acid metabolism	REACTOME_Pathways_09.11.2016	0.58	1	0.58	1	[-1]	Group282	52.8302	28	[ABCC3, ABCD1, ACAA1, ACOT8, AKR1C1, AKR1C3, AKR1C4, ALB, CRAT, CYP27A1, CYP39A1, ELOVL1, ELOVL3, ELOVL5, FABP6, FADS1, FADS2, HSD17B4, HSD3B7, NCOA2, OSBPL1A, OSBPL2, OSBPL3, OSBPL6, OSBPL7, OSBPL9, PTGIS, SCP2]
GO:0000610	alpha-linolenic acid (ALA) metabolism	REACTOME_Pathways_09.11.2016	0.58	1	0.58	1	[-1]	Group282	52.8302	28	[ABCC3, ABCD1, ACAA1, ACOT8, AKR1C1, AKR1C3, AKR1C4, ALB, CRAT, CYP27A1, CYP39A1, ELOVL1, ELOVL3, ELOVL5, FABP6, FADS1, FADS2, HSD17B4, HSD3B7, NCOA2, OSBPL1A, OSBPL2, OSBPL3, OSBPL6, OSBPL7, OSBPL9, PTGIS, SCP2]
GO:0000939	Beta-oxidation of very long chain fatty acids	REACTOME_Pathways_09.11.2016	0.58	1	0.58	1	[-1]	Group282	52.8302	28	[ABCC3, ABCD1, ACAA1, ACOT8, AKR1C1, AKR1C3, AKR1C4, ALB, CRAT, CYP27A1, CYP39A1, ELOVL1, ELOVL3, ELOVL5, FABP6, FADS1, FADS2, HSD17B4, HSD3B7, NCOA2, OSBPL1A, OSBPL2, OSBPL3, OSBPL6, OSBPL7, OSBPL9, PTGIS, SCP2]
GO:0000144	Elevation of cytosolic Ca2+ levels	REACTOME_Pathways_09.11.2016	1	1	0.91	1	[-1]	Group283	50	8	[ITPR1, ITPR2, ITPR3, P2RX1, P2RX2, P2RX4, P2RX5, P2RX6]
GO:0000957	Nitric oxide stimulates guanylate cyclase	REACTOME_Pathways_09.11.2016	0.91	1	0.91	1	[-1]	Group283	48.3146	43	[ATP2A1, ATP2A2, ATP2B4, CALM1, CALM2, CALM3, FGR, GNAS, GNB1, GNB4, GNB5, GNG10, GNG11, GNG12, GNG13, GNG7, GNG8, GUCY1A3, ITPR1, ITPR2, ITPR3, KCNMB2, KCNMB4, LRP8, NOS1, NOS2, NOS3, P2RX1, P2RX2, P2RX4, P2RX5, P2RX6, PDE1A, PDE3B, PECAM1, PLA2G4A, PPP2CA, PPP2R5B, PPP2R5C, PPP2R5E, PTPN11, PTPN6, SRI]
GO:0000997	Platelet homeostasis	REACTOME_Pathways_09.11.2016	0.91	1	0.91	1	[-1]	Group283	48.3146	43	[ATP2A1, ATP2A2, ATP2B4, CALM1, CALM2, CALM3, FGR, GNAS, GNB1, GNB4, GNB5, GNG10, GNG11, GNG12, GNG13, GNG7, GNG8, GUCY1A3, ITPR1, ITPR2, ITPR3, KCNMB2, KCNMB4, LRP8, NOS1, NOS2, NOS3, P2RX1, P2RX2, P2RX4, P2RX5, P2RX6, PDE1A, PDE3B, PECAM1, PLA2G4A, PPP2CA, PPP2R5B, PPP2R5C, PPP2R5E, PTPN11, PTPN6, SRI]
GO:0000998	Reduction of cytosolic Ca++ levels	REACTOME_Pathways_09.11.2016	1	1	0.91	1	[-1]	Group283	50	15	[ATP2A1, ATP2A2, ATP2B4, CALM1, CALM2, CALM3, ITPR1, ITPR2, ITPR3, P2RX1, P2RX2, P2RX4, P2RX5, P2RX6, SRI]
GO:0000999	Platelet calcium homeostasis	REACTOME_Pathways_09.11.2016	1	1	0.91	1	[-1]	Group283	50	15	[ATP2A1, ATP2A2, ATP2B4, CALM1, CALM2, CALM3, ITPR1, ITPR2, ITPR3, P2RX1, P2RX2, P2RX4, P2RX5, P2RX6, SRI]
GO:0001000	cGMP effects	REACTOME_Pathways_09.11.2016	0.91	1	0.91	1	[-1]	Group283	48.3146	43	[ATP2A1, ATP2A2, ATP2B4, CALM1, CALM2, CALM3, FGR, GNAS, GNB1, GNB4, GNB5, GNG10, GNG11, GNG12, GNG13, GNG7, GNG8, GUCY1A3, ITPR1, ITPR2, ITPR3, KCNMB2, KCNMB4, LRP8, NOS1, NOS2, NOS3, P2RX1, P2RX2, P2RX4, P2RX5, P2RX6, PDE1A, PDE3B, PECAM1, PLA2G4A, PPP2CA, PPP2R5B, PPP2R5C, PPP2R5E, PTPN11, PTPN6, SRI]
GO:0000039	Cam-PDE 1 activation	REACTOME_Pathways_09.11.2016	0.11	1	0.88	1	[-1]	Group284	83.3333	5	[CALM1, CALM2, CALM3, PDE1A, PDE1C]
GO:0000726	Activation of the phototransduction cascade	REACTOME_Pathways_09.11.2016	0.4	1	0.88	1	[-1]	Group284	39.1304	9	[CALM1, CALM2, CALM3, CNGB1, GNB1, SLC24A1, SLC24A3, SLC8B1, SRI]
GO:0000729	The phototransduction cascade	REACTOME_Pathways_09.11.2016	0.86	1	0.88	1	[-1]	Group284	47.0588	16	[CALM1, CALM2, CALM3, CAMKMT, CNGB1, FNTA, FNTB, GNB1, GRK1, METAP1, METAP2, NMT1, NMT2, PRKCA, PRKCQ, SLC24A1]
GO:0000730	Inactivation, recovery and regulation of the phototransduction cascade	REACTOME_Pathways_09.11.2016	0.86	1	0.88	1	[-1]	Group284	47.0588	16	[CALM1, CALM2, CALM3, CAMKMT, CNGB1, FNTA, FNTB, GNB1, GRK1, METAP1, METAP2, NMT1, NMT2, PRKCA, PRKCQ, SLC24A1]
GO:0001029	Sodium/Calcium exchangers	REACTOME_Pathways_09.11.2016	0.4	1	0.88	1	[-1]	Group284	39.1304	9	[CALM1, CALM2, CALM3, CNGB1, GNB1, SLC24A1, SLC24A3, SLC8B1, SRI]
GO:0001084	Activation of CaMK IV	REACTOME_Pathways_09.11.2016	0.057	1	0.88	1	[-1]	Group284	100	4	[CALM1, CALM2, CALM3, CAMK4]
GO:0000902	ATF4 activates genes	REACTOME_Pathways_09.11.2016	0.15	1	0.015	1	[-1]	Group285	62.5	20	[AKT1, ATF3, ATF4, ATF6, DCP2, EIF2AK3, EIF2S1, EXOSC2, EXOSC3, EXOSC7, EXOSC8, EXOSC9, HERPUD1, HSPA5, KHSRP, MAPK11, NFYB, NFYC, PARN, YWHAZ]
GO:0000904	XBP1(S) activates chaperone genes	REACTOME_Pathways_09.11.2016	0.023	1	0.015	1	[-1]	Group285	61.3636	54	[ACADVL, ATF3, ATF4, ATF6, CALR, CTDSP2, DCP2, DCTN1, DNAJB11, DNAJB9, DNAJC3, EIF2AK3, EIF2S1, EXOSC2, EXOSC3, EXOSC7, EXOSC8, EXOSC9, FKBP14, GFPT1, GOSR2, GSK3A, HDGF, HERPUD1, HSP90B1, HSPA5, JMJD7-PLA2G4B, KDELR3, KHSRP, LMNA, MBTPS1, MYDGF, NFYB, NFYC, PARN, PDIA5, PDIA6, PPP2R5B, SEC31A, SEC61B, SEC61G, SEC63, SERP1, SHC1, SRPRA, SSR1, SYVN1, TATDN2, TLN1, TPP1, WFS1, WIPI1, YIF1A, ZBTB17]
GO:0000905	PERK regulates gene expression	REACTOME_Pathways_09.11.2016	0.15	1	0.015	1	[-1]	Group285	62.5	20	[AKT1, ATF3, ATF4, ATF6, DCP2, EIF2AK3, EIF2S1, EXOSC2, EXOSC3, EXOSC7, EXOSC8, EXOSC9, HERPUD1, HSPA5, KHSRP, MAPK11, NFYB, NFYC, PARN, YWHAZ]
GO:0000906	IRE1alpha activates chaperones	REACTOME_Pathways_09.11.2016	0.023	1	0.015	1	[-1]	Group285	61.3636	54	[ACADVL, ATF3, ATF4, ATF6, CALR, CTDSP2, DCP2, DCTN1, DNAJB11, DNAJB9, DNAJC3, EIF2AK3, EIF2S1, EXOSC2, EXOSC3, EXOSC7, EXOSC8, EXOSC9, FKBP14, GFPT1, GOSR2, GSK3A, HDGF, HERPUD1, HSP90B1, HSPA5, JMJD7-PLA2G4B, KDELR3, KHSRP, LMNA, MBTPS1, MYDGF, NFYB, NFYC, PARN, PDIA5, PDIA6, PPP2R5B, SEC31A, SEC61B, SEC61G, SEC63, SERP1, SHC1, SRPRA, SSR1, SYVN1, TATDN2, TLN1, TPP1, WFS1, WIPI1, YIF1A, ZBTB17]
GO:0000907	Unfolded Protein Response (UPR)	REACTOME_Pathways_09.11.2016	0.023	1	0.015	1	[-1]	Group285	61.3636	54	[ACADVL, ATF3, ATF4, ATF6, CALR, CTDSP2, DCP2, DCTN1, DNAJB11, DNAJB9, DNAJC3, EIF2AK3, EIF2S1, EXOSC2, EXOSC3, EXOSC7, EXOSC8, EXOSC9, FKBP14, GFPT1, GOSR2, GSK3A, HDGF, HERPUD1, HSP90B1, HSPA5, JMJD7-PLA2G4B, KDELR3, KHSRP, LMNA, MBTPS1, MYDGF, NFYB, NFYC, PARN, PDIA5, PDIA6, PPP2R5B, SEC31A, SEC61B, SEC61G, SEC63, SERP1, SHC1, SRPRA, SSR1, SYVN1, TATDN2, TLN1, TPP1, WFS1, WIPI1, YIF1A, ZBTB17]
GO:0001126	KSRP (KHSRP) binds and destabilizes mRNA	REACTOME_Pathways_09.11.2016	0.15	1	0.015	1	[-1]	Group285	62.5	20	[AKT1, ATF3, ATF4, ATF6, DCP2, EIF2AK3, EIF2S1, EXOSC2, EXOSC3, EXOSC7, EXOSC8, EXOSC9, HERPUD1, HSPA5, KHSRP, MAPK11, NFYB, NFYC, PARN, YWHAZ]
GO:0000109	Developmental Biology	REACTOME_Pathways_09.11.2016	0.47	1	0.47	1	[-1]	Group286	47.822	505	[ABL1, ABL2, ABLIM2, ABLIM3, ACTB, ACTG1, ACTN2, ACTR2, ACTR3, ADAM10, ADAM11, AGRN, AKAP9, AKT1, AKT2, AKT3, ALCAM, ANGPT1, ANGPTL4, ANK1, ANK2, ANK3, AP2B1, AP2M1, AP2S1, APBB1IP, APH1A, APH1B, ARAF, ARHGEF7, ARPC1B, ARPC2, ARPC5, ARTN, ASH2L, BNIP2, BRAF, CACNA1C, CACNA1H, CACNA1I, CACNA1S, CACNG4, CACNG8, CALM1, CALM2, CALM3, CAMK2A, CAMK2G, CAP1, CASP14, CCNC, CD24, CD72, CDC42, CDH2, CDK19,…
GO:0000874	L1CAM interactions	REACTOME_Pathways_09.11.2016	0.025	1	0.47	1	[-1]	Group286	53.5262	296	[ABL1, ABL2, ABLIM2, ABLIM3, ACTB, ACTG1, ACTN2, ACTR2, ACTR3, ADAM10, AGRN, AKAP9, ALCAM, ANGPT1, ANK1, ANK2, ANK3, AP2B1, AP2M1, AP2S1, APBB1IP, APH1A, APH1B, ARAF, ARHGEF7, ARPC1B, ARPC2, ARPC5, ARTN, BRAF, CACNA1C, CACNA1H, CACNA1I, CACNA1S, CALM1, CALM2, CALM3, CAMK2A, CAMK2G, CAP1, CD24, CD72, CDC42, CLASP1, CLTA, CLTB, CNKSR1, COL2A1, COL3A1, COL5A1, COL5A2, COL6A1, COL6A2, COL6A3, COL9A1,…
GO:0001022	Axon guidance	REACTOME_Pathways_09.11.2016	0.025	1	0.47	1	[-1]	Group286	53.5262	296	[ABL1, ABL2, ABLIM2, ABLIM3, ACTB, ACTG1, ACTN2, ACTR2, ACTR3, ADAM10, AGRN, AKAP9, ALCAM, ANGPT1, ANK1, ANK2, ANK3, AP2B1, AP2M1, AP2S1, APBB1IP, APH1A, APH1B, ARAF, ARHGEF7, ARPC1B, ARPC2, ARPC5, ARTN, BRAF, CACNA1C, CACNA1H, CACNA1I, CACNA1S, CALM1, CALM2, CALM3, CAMK2A, CAMK2G, CAP1, CD24, CD72, CDC42, CLASP1, CLTA, CLTB, CNKSR1, COL2A1, COL3A1, COL5A1, COL5A2, COL6A1, COL6A2, COL6A3, COL9A1,…
GO:0001071	Recycling pathway of L1	REACTOME_Pathways_09.11.2016	0.025	1	0.47	1	[-1]	Group286	53.5262	296	[ABL1, ABL2, ABLIM2, ABLIM3, ACTB, ACTG1, ACTN2, ACTR2, ACTR3, ADAM10, AGRN, AKAP9, ALCAM, ANGPT1, ANK1, ANK2, ANK3, AP2B1, AP2M1, AP2S1, APBB1IP, APH1A, APH1B, ARAF, ARHGEF7, ARPC1B, ARPC2, ARPC5, ARTN, BRAF, CACNA1C, CACNA1H, CACNA1I, CACNA1S, CALM1, CALM2, CALM3, CAMK2A, CAMK2G, CAP1, CD24, CD72, CDC42, CLASP1, CLTA, CLTB, CNKSR1, COL2A1, COL3A1, COL5A1, COL5A2, COL6A1, COL6A2, COL6A3, COL9A1,…
GO:0001492	Keratinization	REACTOME_Pathways_09.11.2016	0.47	1	0.47	1	[-1]	Group286	47.822	505	[ABL1, ABL2, ABLIM2, ABLIM3, ACTB, ACTG1, ACTN2, ACTR2, ACTR3, ADAM10, ADAM11, AGRN, AKAP9, AKT1, AKT2, AKT3, ALCAM, ANGPT1, ANGPTL4, ANK1, ANK2, ANK3, AP2B1, AP2M1, AP2S1, APBB1IP, APH1A, APH1B, ARAF, ARHGEF7, ARPC1B, ARPC2, ARPC5, ARTN, ASH2L, BNIP2, BRAF, CACNA1C, CACNA1H, CACNA1I, CACNA1S, CACNG4, CACNG8, CALM1, CALM2, CALM3, CAMK2A, CAMK2G, CAP1, CASP14, CCNC, CD24, CD72, CDC42, CDH2, CDK19,…
GO:0001503	Formation of the cornified envelope	REACTOME_Pathways_09.11.2016	0.47	1	0.47	1	[-1]	Group286	47.822	505	[ABL1, ABL2, ABLIM2, ABLIM3, ACTB, ACTG1, ACTN2, ACTR2, ACTR3, ADAM10, ADAM11, AGRN, AKAP9, AKT1, AKT2, AKT3, ALCAM, ANGPT1, ANGPTL4, ANK1, ANK2, ANK3, AP2B1, AP2M1, AP2S1, APBB1IP, APH1A, APH1B, ARAF, ARHGEF7, ARPC1B, ARPC2, ARPC5, ARTN, ASH2L, BNIP2, BRAF, CACNA1C, CACNA1H, CACNA1I, CACNA1S, CACNG4, CACNG8, CALM1, CALM2, CALM3, CAMK2A, CAMK2G, CAP1, CASP14, CCNC, CD24, CD72, CDC42, CDH2, CDK19,…
GO:0000361	Neurotoxicity of clostridium toxins	REACTOME_Pathways_09.11.2016	0.54	1	0.3	1	[-1]	Group287	60	6	[SNAP25, STX1A, SV2A, SYT1, SYT2, VAMP2]
GO:0001185	Toxicity of botulinum toxin type B (BoNT/B)	REACTOME_Pathways_09.11.2016	0.54	1	0.3	1	[-1]	Group287	60	6	[SNAP25, STX1A, SV2A, SYT1, SYT2, VAMP2]
GO:0001186	Toxicity of botulinum toxin type A (BoNT/A)	REACTOME_Pathways_09.11.2016	1	1	0.3	1	[-1]	Group287	50	3	[SNAP25, STX1A, SV2A]
GO:0001187	Toxicity of botulinum toxin type C (BoNT/C)	REACTOME_Pathways_09.11.2016	1	1	0.3	1	[-1]	Group287	50	3	[SNAP25, STX1A, SV2A]
GO:0001190	Toxicity of botulinum toxin type G (BoNT/G)	REACTOME_Pathways_09.11.2016	0.54	1	0.3	1	[-1]	Group287	60	6	[SNAP25, STX1A, SV2A, SYT1, SYT2, VAMP2]
GO:0001191	Toxicity of botulinum toxin type E (BoNT/E)	REACTOME_Pathways_09.11.2016	1	1	0.3	1	[-1]	Group287	50	3	[SNAP25, STX1A, SV2A]
GO:0001778	GABA synthesis, release, reuptake and degradation	REACTOME_Pathways_09.11.2016	0.48	1	0.3	1	[-1]	Group287	38.8889	7	[ABAT, CPLX1, DNAJC5, SNAP25, STX1A, SYT1, VAMP2]
GO:0000561	PPARA activates gene expression	REACTOME_Pathways_09.11.2016	0.31	1	0.31	1	[-1]	Group288	52.1401	134	[AACS, ABCB4, ACAA2, ACACA, ACACB, ACAD10, ACADM, ACADVL, ACAT1, ACBD6, ACBD7, ACOT1, ACOT4, ACOT7, ACOT8, ACOT9, ACSBG2, ACSL3, ACSL4, ACSL5, ACSS3, AGPAT2, AGPAT4, AGPAT5, AGT, ANGPTL4, APOA1, APOA5, CBR4, CCNC, CDK19, CEBPB, CEBPD, CHD9, CPT1A, CREBBP, CYP4A11, DBI, DECR1, DGAT1, EBF1, ECHS1, EGR2, ELOVL1, ELOVL3, ELOVL4, ELOVL5, EP300, ESRRA, FADS1, FHL2, GLIPR1, GPAT2, GPD2, HACD2, HACD3, HA…
GO:0000909	Transcriptional regulation of white adipocyte differentiation	REACTOME_Pathways_09.11.2016	0.31	1	0.31	1	[-1]	Group288	52.1401	134	[AACS, ABCB4, ACAA2, ACACA, ACACB, ACAD10, ACADM, ACADVL, ACAT1, ACBD6, ACBD7, ACOT1, ACOT4, ACOT7, ACOT8, ACOT9, ACSBG2, ACSL3, ACSL4, ACSL5, ACSS3, AGPAT2, AGPAT4, AGPAT5, AGT, ANGPTL4, APOA1, APOA5, CBR4, CCNC, CDK19, CEBPB, CEBPD, CHD9, CPT1A, CREBBP, CYP4A11, DBI, DECR1, DGAT1, EBF1, ECHS1, EGR2, ELOVL1, ELOVL3, ELOVL4, ELOVL5, EP300, ESRRA, FADS1, FHL2, GLIPR1, GPAT2, GPD2, HACD2, HACD3, HA…
GO:0000978	Regulation of lipid metabolism by Peroxisome proliferator-activated receptor alpha (PPARalpha)	REACTOME_Pathways_09.11.2016	0.31	1	0.31	1	[-1]	Group288	52.1401	134	[AACS, ABCB4, ACAA2, ACACA, ACACB, ACAD10, ACADM, ACADVL, ACAT1, ACBD6, ACBD7, ACOT1, ACOT4, ACOT7, ACOT8, ACOT9, ACSBG2, ACSL3, ACSL4, ACSL5, ACSS3, AGPAT2, AGPAT4, AGPAT5, AGT, ANGPTL4, APOA1, APOA5, CBR4, CCNC, CDK19, CEBPB, CEBPD, CHD9, CPT1A, CREBBP, CYP4A11, DBI, DECR1, DGAT1, EBF1, ECHS1, EGR2, ELOVL1, ELOVL3, ELOVL4, ELOVL5, EP300, ESRRA, FADS1, FHL2, GLIPR1, GPAT2, GPD2, HACD2, HACD3, HA…
GO:0001204	Fatty acid, triacylglycerol, and ketone body metabolism	REACTOME_Pathways_09.11.2016	0.31	1	0.31	1	[-1]	Group288	52.1401	134	[AACS, ABCB4, ACAA2, ACACA, ACACB, ACAD10, ACADM, ACADVL, ACAT1, ACBD6, ACBD7, ACOT1, ACOT4, ACOT7, ACOT8, ACOT9, ACSBG2, ACSL3, ACSL4, ACSL5, ACSS3, AGPAT2, AGPAT4, AGPAT5, AGT, ANGPTL4, APOA1, APOA5, CBR4, CCNC, CDK19, CEBPB, CEBPD, CHD9, CPT1A, CREBBP, CYP4A11, DBI, DECR1, DGAT1, EBF1, ECHS1, EGR2, ELOVL1, ELOVL3, ELOVL4, ELOVL5, EP300, ESRRA, FADS1, FHL2, GLIPR1, GPAT2, GPD2, HACD2, HACD3, HA…
GO:0001666	Fatty Acyl-CoA Biosynthesis	REACTOME_Pathways_09.11.2016	1	1	0.31	1	[-1]	Group288	48.6842	37	[ACACA, ACBD6, ACBD7, ACOT1, ACOT4, ACOT7, ACOT8, ACOT9, ACSBG2, ACSL3, ACSL4, ACSL5, AGPAT2, AGPAT4, AGPAT5, DBI, DGAT1, ELOVL1, ELOVL3, ELOVL4, ELOVL5, GPAT2, HACD2, HACD3, HACD4, HSD17B12, LCLAT1, LPCAT1, LPIN1, MOGAT1, PCTP, PPT1, PPT2, SCD, SCD5, TECR, THEM4]
GO:0001668	Triglyceride Biosynthesis	REACTOME_Pathways_09.11.2016	1	1	0.31	1	[-1]	Group288	48.6842	37	[ACACA, ACBD6, ACBD7, ACOT1, ACOT4, ACOT7, ACOT8, ACOT9, ACSBG2, ACSL3, ACSL4, ACSL5, AGPAT2, AGPAT4, AGPAT5, DBI, DGAT1, ELOVL1, ELOVL3, ELOVL4, ELOVL5, GPAT2, HACD2, HACD3, HACD4, HSD17B12, LCLAT1, LPCAT1, LPIN1, MOGAT1, PCTP, PPT1, PPT2, SCD, SCD5, TECR, THEM4]
GO:0001674	Synthesis of very long-chain fatty acyl-CoAs	REACTOME_Pathways_09.11.2016	1	1	0.31	1	[-1]	Group288	48.6842	37	[ACACA, ACBD6, ACBD7, ACOT1, ACOT4, ACOT7, ACOT8, ACOT9, ACSBG2, ACSL3, ACSL4, ACSL5, AGPAT2, AGPAT4, AGPAT5, DBI, DGAT1, ELOVL1, ELOVL3, ELOVL4, ELOVL5, GPAT2, HACD2, HACD3, HACD4, HSD17B12, LCLAT1, LPCAT1, LPIN1, MOGAT1, PCTP, PPT1, PPT2, SCD, SCD5, TECR, THEM4]
GO:0000140	RORA activates gene expression	REACTOME_Pathways_09.11.2016	0.052	1	0.065	1	[-1]	Group289	60.8696	42	[ARNTL2, BHLHE40, BHLHE41, BTRC, CHD9, CPT1A, CREB1, CREBBP, CRTC1, CRTC2, CRTC3, CRY1, CRY2, CSNK1E, EP300, F7, FBXL3, HDAC3, HELZ2, HIF1A, MEF2D, NAMPT, NCOA2, NFIL3, NR3C1, NRIP1, PER1, PER2, PPARGC1A, PPP1CB, PPP1CC, RAI1, RORA, SERPINE1, SIK1, SKP1, SMARCD3, SREBF1, TBL1X, TBL1XR1, TGS1, UBC]
GO:0000141	BMAL1:CLOCK,NPAS2 activates circadian gene expression	REACTOME_Pathways_09.11.2016	0.052	1	0.065	1	[-1]	Group289	60.8696	42	[ARNTL2, BHLHE40, BHLHE41, BTRC, CHD9, CPT1A, CREB1, CREBBP, CRTC1, CRTC2, CRTC3, CRY1, CRY2, CSNK1E, EP300, F7, FBXL3, HDAC3, HELZ2, HIF1A, MEF2D, NAMPT, NCOA2, NFIL3, NR3C1, NRIP1, PER1, PER2, PPARGC1A, PPP1CB, PPP1CC, RAI1, RORA, SERPINE1, SIK1, SKP1, SMARCD3, SREBF1, TBL1X, TBL1XR1, TGS1, UBC]
GO:0000223	Mitochondrial biogenesis	REACTOME_Pathways_09.11.2016	0.33	1	0.065	1	[-1]	Group289	55.7692	29	[CHD9, CREB1, CREBBP, CRTC1, CRTC2, CRTC3, CYCS, ESRRA, GABPA, HDAC3, HELZ2, MAPK11, MAPK12, MEF2D, MTERF1, NCOA2, POLG2, PPARGC1A, PRKAA2, PRKAB2, PRKAG1, PRKAG2, PRKAG3, SIRT3, SMARCD3, TBL1X, TBL1XR1, TFB2M, TGS1]
GO:0000260	Mitochondrial transcription initiation	REACTOME_Pathways_09.11.2016	0.33	1	0.065	1	[-1]	Group289	55.7692	29	[CHD9, CREB1, CREBBP, CRTC1, CRTC2, CRTC3, CYCS, ESRRA, GABPA, HDAC3, HELZ2, MAPK11, MAPK12, MEF2D, MTERF1, NCOA2, POLG2, PPARGC1A, PRKAA2, PRKAB2, PRKAG1, PRKAG2, PRKAG3, SIRT3, SMARCD3, TBL1X, TBL1XR1, TFB2M, TGS1]
GO:0000673	Transcriptional activation of mitochondrial biogenesis	REACTOME_Pathways_09.11.2016	0.33	1	0.065	1	[-1]	Group289	55.7692	29	[CHD9, CREB1, CREBBP, CRTC1, CRTC2, CRTC3, CYCS, ESRRA, GABPA, HDAC3, HELZ2, MAPK11, MAPK12, MEF2D, MTERF1, NCOA2, POLG2, PPARGC1A, PRKAA2, PRKAB2, PRKAG1, PRKAG2, PRKAG3, SIRT3, SMARCD3, TBL1X, TBL1XR1, TFB2M, TGS1]
GO:0000979	Circadian Clock	REACTOME_Pathways_09.11.2016	0.052	1	0.065	1	[-1]	Group289	60.8696	42	[ARNTL2, BHLHE40, BHLHE41, BTRC, CHD9, CPT1A, CREB1, CREBBP, CRTC1, CRTC2, CRTC3, CRY1, CRY2, CSNK1E, EP300, F7, FBXL3, HDAC3, HELZ2, HIF1A, MEF2D, NAMPT, NCOA2, NFIL3, NR3C1, NRIP1, PER1, PER2, PPARGC1A, PPP1CB, PPP1CC, RAI1, RORA, SERPINE1, SIK1, SKP1, SMARCD3, SREBF1, TBL1X, TBL1XR1, TGS1, UBC]
GO:0001678	Transcription from mitochondrial promoters	REACTOME_Pathways_09.11.2016	0.33	1	0.065	1	[-1]	Group289	55.7692	29	[CHD9, CREB1, CREBBP, CRTC1, CRTC2, CRTC3, CYCS, ESRRA, GABPA, HDAC3, HELZ2, MAPK11, MAPK12, MEF2D, MTERF1, NCOA2, POLG2, PPARGC1A, PRKAA2, PRKAB2, PRKAG1, PRKAG2, PRKAG3, SIRT3, SMARCD3, TBL1X, TBL1XR1, TFB2M, TGS1]
GO:0000360	Nucleotide-binding domain, leucine rich repeat containing receptor (NLR) signaling pathways	REACTOME_Pathways_09.11.2016	0.4	1	0.49	1	[-1]	Group290	42.3077	22	[APP, BIRC2, CASP2, CYLD, HSP90AB1, ITCH, MAP2K6, MAP3K7, MAPK11, MAPK12, MEFV, NLRP1, NLRP3, NOD2, PANX1, RIPK2, SUGT1, TAB2, TXN, UBC, UBE2N, UBE2V1]
GO:0001118	activated TAK1 mediates p38 MAPK activation	REACTOME_Pathways_09.11.2016	0.66	1	0.49	1	[-1]	Group290	42.8571	9	[MAP2K3, MAP2K6, MAP3K7, MAPK11, MAPKAPK2, NOD2, RIPK2, TAB2, UBC]
GO:0001434	Inflammasomes	REACTOME_Pathways_09.11.2016	0.4	1	0.49	1	[-1]	Group290	42.3077	22	[APP, BIRC2, CASP2, CYLD, HSP90AB1, ITCH, MAP2K6, MAP3K7, MAPK11, MAPK12, MEFV, NLRP1, NLRP3, NOD2, PANX1, RIPK2, SUGT1, TAB2, TXN, UBC, UBE2N, UBE2V1]
GO:0001710	The NLRP3 inflammasome	REACTOME_Pathways_09.11.2016	0.57	1	0.49	1	[-1]	Group290	58.3333	7	[APP, HSP90AB1, MEFV, NLRP3, PANX1, SUGT1, TXN]
GO:0001711	The AIM2 inflammasome	REACTOME_Pathways_09.11.2016	0.4	1	0.49	1	[-1]	Group290	42.3077	22	[APP, BIRC2, CASP2, CYLD, HSP90AB1, ITCH, MAP2K6, MAP3K7, MAPK11, MAPK12, MEFV, NLRP1, NLRP3, NOD2, PANX1, RIPK2, SUGT1, TAB2, TXN, UBC, UBE2N, UBE2V1]
GO:0001804	IRAK2 mediated activation of TAK1 complex	REACTOME_Pathways_09.11.2016	0.66	1	0.49	1	[-1]	Group290	42.8571	9	[MAP2K3, MAP2K6, MAP3K7, MAPK11, MAPKAPK2, NOD2, RIPK2, TAB2, UBC]
GO:0001816	IRAK2 mediated activation of TAK1 complex upon TLR7/8 or 9 stimulation	REACTOME_Pathways_09.11.2016	0.66	1	0.49	1	[-1]	Group290	42.8571	9	[MAP2K3, MAP2K6, MAP3K7, MAPK11, MAPKAPK2, NOD2, RIPK2, TAB2, UBC]
GO:0000309	Complement cascade	REACTOME_Pathways_09.11.2016	0.76	1	0.76	1	[-1]	Group291	52.2727	23	[C1QA, C1QB, C1QC, C1R, C2, C3, C3AR1, C4B, C5, C8B, CD46, CD55, CD59, CFB, CFD, CFH, CFHR3, CFI, CFP, COLEC10, FCN1, GZMM, VTN]
GO:0000310	Lectin pathway of complement activation	REACTOME_Pathways_09.11.2016	0.76	1	0.76	1	[-1]	Group291	52.2727	23	[C1QA, C1QB, C1QC, C1R, C2, C3, C3AR1, C4B, C5, C8B, CD46, CD55, CD59, CFB, CFD, CFH, CFHR3, CFI, CFP, COLEC10, FCN1, GZMM, VTN]
GO:0000311	Initial triggering of complement	REACTOME_Pathways_09.11.2016	0.76	1	0.76	1	[-1]	Group291	52.2727	23	[C1QA, C1QB, C1QC, C1R, C2, C3, C3AR1, C4B, C5, C8B, CD46, CD55, CD59, CFB, CFD, CFH, CFHR3, CFI, CFP, COLEC10, FCN1, GZMM, VTN]
GO:0000313	Creation of C4 and C2 activators	REACTOME_Pathways_09.11.2016	0.76	1	0.76	1	[-1]	Group291	52.2727	23	[C1QA, C1QB, C1QC, C1R, C2, C3, C3AR1, C4B, C5, C8B, CD46, CD55, CD59, CFB, CFD, CFH, CFHR3, CFI, CFP, COLEC10, FCN1, GZMM, VTN]
GO:0000399	Activation of C3 and C5	REACTOME_Pathways_09.11.2016	0.7	1	0.76	1	[-1]	Group291	53.5714	15	[C2, C3, C3AR1, C4B, C5, C8B, CD46, CD55, CD59, CFB, CFH, CFHR3, CFI, CFP, VTN]
GO:0000759	Ficolins bind to repetitive carbohydrate structures on the target cell surface	REACTOME_Pathways_09.11.2016	0.76	1	0.76	1	[-1]	Group291	52.2727	23	[C1QA, C1QB, C1QC, C1R, C2, C3, C3AR1, C4B, C5, C8B, CD46, CD55, CD59, CFB, CFD, CFH, CFHR3, CFI, CFP, COLEC10, FCN1, GZMM, VTN]
GO:0001833	Regulation of Complement cascade	REACTOME_Pathways_09.11.2016	0.7	1	0.76	1	[-1]	Group291	53.5714	15	[C2, C3, C3AR1, C4B, C5, C8B, CD46, CD55, CD59, CFB, CFH, CFHR3, CFI, CFP, VTN]
GO:0000051	Neurotransmitter Clearance In The Synaptic Cleft	REACTOME_Pathways_09.11.2016	0.51	1	0.51	1	[-1]	Group292	45.6897	53	[ACHE, ADAL, BCHE, BSG, COMT, CP, RHBG, RHCG, RUNX1, SLC11A1, SLC13A2, SLC14A1, SLC14A2, SLC16A1, SLC16A3, SLC18A1, SLC22A11, SLC22A12, SLC22A15, SLC22A16, SLC22A18, SLC22A4, SLC22A5, SLC22A6, SLC22A7, SLC22A8, SLC2A1, SLC2A12, SLC2A14, SLC2A3, SLC2A5, SLC30A1, SLC30A5, SLC30A6, SLC30A7, SLC39A1, SLC39A10, SLC39A14, SLC39A6, SLC39A8, SLC40A1, SLC41A2, SLC44A1, SLC44A2, SLC44A3, SLC47A1, SLC5A11, …
GO:0000677	Abacavir transmembrane transport	REACTOME_Pathways_09.11.2016	0.51	1	0.51	1	[-1]	Group292	45.6897	53	[ACHE, ADAL, BCHE, BSG, COMT, CP, RHBG, RHCG, RUNX1, SLC11A1, SLC13A2, SLC14A1, SLC14A2, SLC16A1, SLC16A3, SLC18A1, SLC22A11, SLC22A12, SLC22A15, SLC22A16, SLC22A18, SLC22A4, SLC22A5, SLC22A6, SLC22A7, SLC22A8, SLC2A1, SLC2A12, SLC2A14, SLC2A3, SLC2A5, SLC30A1, SLC30A5, SLC30A6, SLC30A7, SLC39A1, SLC39A10, SLC39A14, SLC39A6, SLC39A8, SLC40A1, SLC41A2, SLC44A1, SLC44A2, SLC44A3, SLC47A1, SLC5A11, …
GO:0000678	Abacavir transport and metabolism	REACTOME_Pathways_09.11.2016	0.51	1	0.51	1	[-1]	Group292	45.6897	53	[ACHE, ADAL, BCHE, BSG, COMT, CP, RHBG, RHCG, RUNX1, SLC11A1, SLC13A2, SLC14A1, SLC14A2, SLC16A1, SLC16A3, SLC18A1, SLC22A11, SLC22A12, SLC22A15, SLC22A16, SLC22A18, SLC22A4, SLC22A5, SLC22A6, SLC22A7, SLC22A8, SLC2A1, SLC2A12, SLC2A14, SLC2A3, SLC2A5, SLC30A1, SLC30A5, SLC30A6, SLC30A7, SLC39A1, SLC39A10, SLC39A14, SLC39A6, SLC39A8, SLC40A1, SLC41A2, SLC44A1, SLC44A2, SLC44A3, SLC47A1, SLC5A11, …
GO:0001023	Transport of glucose and other sugars, bile salts and organic acids, metal ions and amine compounds	REACTOME_Pathways_09.11.2016	0.51	1	0.51	1	[-1]	Group292	45.6897	53	[ACHE, ADAL, BCHE, BSG, COMT, CP, RHBG, RHCG, RUNX1, SLC11A1, SLC13A2, SLC14A1, SLC14A2, SLC16A1, SLC16A3, SLC18A1, SLC22A11, SLC22A12, SLC22A15, SLC22A16, SLC22A18, SLC22A4, SLC22A5, SLC22A6, SLC22A7, SLC22A8, SLC2A1, SLC2A12, SLC2A14, SLC2A3, SLC2A5, SLC30A1, SLC30A5, SLC30A6, SLC30A7, SLC39A1, SLC39A10, SLC39A14, SLC39A6, SLC39A8, SLC40A1, SLC41A2, SLC44A1, SLC44A2, SLC44A3, SLC47A1, SLC5A11, …
GO:0001079	Na+/Cl- dependent neurotransmitter transporters	REACTOME_Pathways_09.11.2016	0.51	1	0.51	1	[-1]	Group292	45.6897	53	[ACHE, ADAL, BCHE, BSG, COMT, CP, RHBG, RHCG, RUNX1, SLC11A1, SLC13A2, SLC14A1, SLC14A2, SLC16A1, SLC16A3, SLC18A1, SLC22A11, SLC22A12, SLC22A15, SLC22A16, SLC22A18, SLC22A4, SLC22A5, SLC22A6, SLC22A7, SLC22A8, SLC2A1, SLC2A12, SLC2A14, SLC2A3, SLC2A5, SLC30A1, SLC30A5, SLC30A6, SLC30A7, SLC39A1, SLC39A10, SLC39A14, SLC39A6, SLC39A8, SLC40A1, SLC41A2, SLC44A1, SLC44A2, SLC44A3, SLC47A1, SLC5A11, …
GO:0001237	Organic cation transport	REACTOME_Pathways_09.11.2016	0.51	1	0.51	1	[-1]	Group292	45.6897	53	[ACHE, ADAL, BCHE, BSG, COMT, CP, RHBG, RHCG, RUNX1, SLC11A1, SLC13A2, SLC14A1, SLC14A2, SLC16A1, SLC16A3, SLC18A1, SLC22A11, SLC22A12, SLC22A15, SLC22A16, SLC22A18, SLC22A4, SLC22A5, SLC22A6, SLC22A7, SLC22A8, SLC2A1, SLC2A12, SLC2A14, SLC2A3, SLC2A5, SLC30A1, SLC30A5, SLC30A6, SLC30A7, SLC39A1, SLC39A10, SLC39A14, SLC39A6, SLC39A8, SLC40A1, SLC41A2, SLC44A1, SLC44A2, SLC44A3, SLC47A1, SLC5A11, …
GO:0001238	Organic cation/anion/zwitterion transport	REACTOME_Pathways_09.11.2016	0.51	1	0.51	1	[-1]	Group292	45.6897	53	[ACHE, ADAL, BCHE, BSG, COMT, CP, RHBG, RHCG, RUNX1, SLC11A1, SLC13A2, SLC14A1, SLC14A2, SLC16A1, SLC16A3, SLC18A1, SLC22A11, SLC22A12, SLC22A15, SLC22A16, SLC22A18, SLC22A4, SLC22A5, SLC22A6, SLC22A7, SLC22A8, SLC2A1, SLC2A12, SLC2A14, SLC2A3, SLC2A5, SLC30A1, SLC30A5, SLC30A6, SLC30A7, SLC39A1, SLC39A10, SLC39A14, SLC39A6, SLC39A8, SLC40A1, SLC41A2, SLC44A1, SLC44A2, SLC44A3, SLC47A1, SLC5A11, …
GO:0000514	Synthesis of bile acids and bile salts via 24-hydroxycholesterol	REACTOME_Pathways_09.11.2016	1	1	0.03	1	[-1]	Group293	50	7	[AKR1C1, AKR1C3, AKR1C4, CYP27A1, CYP39A1, HSD3B7, PTGIS]
GO:0000515	Synthesis of bile acids and bile salts via 27-hydroxycholesterol	REACTOME_Pathways_09.11.2016	1	1	0.03	1	[-1]	Group293	50	15	[AKR1C1, AKR1C3, AKR1C4, CYP11A1, CYP11B1, CYP1B1, CYP21A2, CYP27A1, CYP39A1, CYP51A1, FDX1, FDX1L, HSD3B7, NCOA2, PTGIS]
GO:0000540	Vitamin D (calciferol) metabolism	REACTOME_Pathways_09.11.2016	0.065	1	0.03	1	[-1]	Group293	37.3134	25	[CYP11A1, CYP11B1, CYP1B1, CYP21A2, CYP26B1, CYP26C1, CYP27A1, CYP2A13, CYP2B6, CYP2E1, CYP2R1, CYP2S1, CYP2U1, CYP2W1, CYP39A1, CYP3A5, CYP4A11, CYP4B1, CYP4F22, CYP51A1, FDX1, FDX1L, LGMN, NCOA2, PTGIS]
GO:0000641	Cytochrome P450 - arranged by substrate type	REACTOME_Pathways_09.11.2016	0.065	1	0.03	1	[-1]	Group293	37.3134	25	[CYP11A1, CYP11B1, CYP1B1, CYP21A2, CYP26B1, CYP26C1, CYP27A1, CYP2A13, CYP2B6, CYP2E1, CYP2R1, CYP2S1, CYP2U1, CYP2W1, CYP39A1, CYP3A5, CYP4A11, CYP4B1, CYP4F22, CYP51A1, FDX1, FDX1L, LGMN, NCOA2, PTGIS]
GO:0000642	Vitamins	REACTOME_Pathways_09.11.2016	0.065	1	0.03	1	[-1]	Group293	37.3134	25	[CYP11A1, CYP11B1, CYP1B1, CYP21A2, CYP26B1, CYP26C1, CYP27A1, CYP2A13, CYP2B6, CYP2E1, CYP2R1, CYP2S1, CYP2U1, CYP2W1, CYP39A1, CYP3A5, CYP4A11, CYP4B1, CYP4F22, CYP51A1, FDX1, FDX1L, LGMN, NCOA2, PTGIS]
GO:0000644	Phase 1 - Functionalization of compounds	REACTOME_Pathways_09.11.2016	0.045	1	0.03	1	[-1]	Group293	38.0435	35	[AADAC, ACSS1, ADH1C, ALDH1A1, AOC1, AOC3, BPHL, CES1, CYP11A1, CYP11B1, CYP1B1, CYP21A2, CYP26B1, CYP26C1, CYP27A1, CYP2A13, CYP2B6, CYP2E1, CYP2R1, CYP2S1, CYP2U1, CYP2W1, CYP39A1, CYP3A5, CYP4A11, CYP4B1, CYP4F22, CYP51A1, FDX1, FDX1L, FMO1, FMO2, NCOA2, PAOX, PTGIS]
GO:0000647	Endogenous sterols	REACTOME_Pathways_09.11.2016	1	1	0.03	1	[-1]	Group293	50	15	[AKR1C1, AKR1C3, AKR1C4, CYP11A1, CYP11B1, CYP1B1, CYP21A2, CYP27A1, CYP39A1, CYP51A1, FDX1, FDX1L, HSD3B7, NCOA2, PTGIS]
GO:0000108	Interleukin-7 signaling	REACTOME_Pathways_09.11.2016	0.0012	0.38	0.0012	0.28	[-1]	Group294	60.199	121	[AHCYL1, AKT1, AKT2, AKT3, ANGPT1, ANGPT4, ATP1B1, ATP1B2, ATP1B3, BRWD1, BSG, CAV1, CD177, CD2, CD274, CD28, CD3D, CD3E, CD3G, CD4, CD44, CD58, CD74, CDC42, CEACAM6, COL1A1, COL1A2, CSK, ESAM, FCER1G, FCGR2A, FCGR3A, FN1, GAS6, GLG1, GRB14, GRB7, HIST1H3A, HIST1H3B, HIST1H3C, HIST1H3D, HIST1H3E, HIST1H3G, HIST1H3J, HIST2H3A, HIST2H3D, HLA-DPA1, HLA-DPB1, HLA-DQA1, HLA-DQB1, HLA-DQB2, HLA-DRA, HL…
GO:0000591	Cell surface interactions at the vascular wall	REACTOME_Pathways_09.11.2016	0.0012	0.38	0.0012	0.28	[-1]	Group294	60.199	121	[AHCYL1, AKT1, AKT2, AKT3, ANGPT1, ANGPT4, ATP1B1, ATP1B2, ATP1B3, BRWD1, BSG, CAV1, CD177, CD2, CD274, CD28, CD3D, CD3E, CD3G, CD4, CD44, CD58, CD74, CDC42, CEACAM6, COL1A1, COL1A2, CSK, ESAM, FCER1G, FCGR2A, FCGR3A, FN1, GAS6, GLG1, GRB14, GRB7, HIST1H3A, HIST1H3B, HIST1H3C, HIST1H3D, HIST1H3E, HIST1H3G, HIST1H3J, HIST2H3A, HIST2H3D, HLA-DPA1, HLA-DPB1, HLA-DQA1, HLA-DQB1, HLA-DQB2, HLA-DRA, HL…
GO:0000596	Role of phospholipids in phagocytosis	REACTOME_Pathways_09.11.2016	0.0012	0.38	0.0012	0.28	[-1]	Group294	60.199	121	[AHCYL1, AKT1, AKT2, AKT3, ANGPT1, ANGPT4, ATP1B1, ATP1B2, ATP1B3, BRWD1, BSG, CAV1, CD177, CD2, CD274, CD28, CD3D, CD3E, CD3G, CD4, CD44, CD58, CD74, CDC42, CEACAM6, COL1A1, COL1A2, CSK, ESAM, FCER1G, FCGR2A, FCGR3A, FN1, GAS6, GLG1, GRB14, GRB7, HIST1H3A, HIST1H3B, HIST1H3C, HIST1H3D, HIST1H3E, HIST1H3G, HIST1H3J, HIST2H3A, HIST2H3D, HLA-DPA1, HLA-DPB1, HLA-DQA1, HLA-DQB1, HLA-DQB2, HLA-DRA, HL…
GO:0000633	Tie2 Signaling	REACTOME_Pathways_09.11.2016	0.0012	0.38	0.0012	0.28	[-1]	Group294	60.199	121	[AHCYL1, AKT1, AKT2, AKT3, ANGPT1, ANGPT4, ATP1B1, ATP1B2, ATP1B3, BRWD1, BSG, CAV1, CD177, CD2, CD274, CD28, CD3D, CD3E, CD3G, CD4, CD44, CD58, CD74, CDC42, CEACAM6, COL1A1, COL1A2, CSK, ESAM, FCER1G, FCGR2A, FCGR3A, FN1, GAS6, GLG1, GRB14, GRB7, HIST1H3A, HIST1H3B, HIST1H3C, HIST1H3D, HIST1H3E, HIST1H3G, HIST1H3J, HIST2H3A, HIST2H3D, HLA-DPA1, HLA-DPB1, HLA-DQA1, HLA-DQB1, HLA-DQB2, HLA-DRA, HL…
GO:0000924	Costimulation by the CD28 family	REACTOME_Pathways_09.11.2016	0.0012	0.38	0.0012	0.28	[-1]	Group294	60.199	121	[AHCYL1, AKT1, AKT2, AKT3, ANGPT1, ANGPT4, ATP1B1, ATP1B2, ATP1B3, BRWD1, BSG, CAV1, CD177, CD2, CD274, CD28, CD3D, CD3E, CD3G, CD4, CD44, CD58, CD74, CDC42, CEACAM6, COL1A1, COL1A2, CSK, ESAM, FCER1G, FCGR2A, FCGR3A, FN1, GAS6, GLG1, GRB14, GRB7, HIST1H3A, HIST1H3B, HIST1H3C, HIST1H3D, HIST1H3E, HIST1H3G, HIST1H3J, HIST2H3A, HIST2H3D, HLA-DPA1, HLA-DPB1, HLA-DQA1, HLA-DQB1, HLA-DQB2, HLA-DRA, HL…
GO:0000925	CD28 co-stimulation	REACTOME_Pathways_09.11.2016	0.0012	0.38	0.0012	0.28	[-1]	Group294	60.199	121	[AHCYL1, AKT1, AKT2, AKT3, ANGPT1, ANGPT4, ATP1B1, ATP1B2, ATP1B3, BRWD1, BSG, CAV1, CD177, CD2, CD274, CD28, CD3D, CD3E, CD3G, CD4, CD44, CD58, CD74, CDC42, CEACAM6, COL1A1, COL1A2, CSK, ESAM, FCER1G, FCGR2A, FCGR3A, FN1, GAS6, GLG1, GRB14, GRB7, HIST1H3A, HIST1H3B, HIST1H3C, HIST1H3D, HIST1H3E, HIST1H3G, HIST1H3J, HIST2H3A, HIST2H3D, HLA-DPA1, HLA-DPB1, HLA-DQA1, HLA-DQB1, HLA-DQB2, HLA-DRA, HL…
GO:0000926	CD28 dependent PI3K/Akt signaling	REACTOME_Pathways_09.11.2016	0.0012	0.38	0.0012	0.28	[-1]	Group294	60.199	121	[AHCYL1, AKT1, AKT2, AKT3, ANGPT1, ANGPT4, ATP1B1, ATP1B2, ATP1B3, BRWD1, BSG, CAV1, CD177, CD2, CD274, CD28, CD3D, CD3E, CD3G, CD4, CD44, CD58, CD74, CDC42, CEACAM6, COL1A1, COL1A2, CSK, ESAM, FCER1G, FCGR2A, FCGR3A, FN1, GAS6, GLG1, GRB14, GRB7, HIST1H3A, HIST1H3B, HIST1H3C, HIST1H3D, HIST1H3E, HIST1H3G, HIST1H3J, HIST2H3A, HIST2H3D, HLA-DPA1, HLA-DPB1, HLA-DQA1, HLA-DQB1, HLA-DQB2, HLA-DRA, HL…
GO:0000521	Neurophilin interactions with VEGF and VEGFR	REACTOME_Pathways_09.11.2016	0.083	1	0.017	1	[-1]	Group295	63.4146	26	[CSNK2A1, CSNK2A2, EGFR, HSP90AA1, HSP90AB1, ITGA2B, ITGA5, ITGAV, ITGB1, LIMK1, MAP2K1, MAPK3, NCAM1, NRP1, PAK1, PAK2, PLXNA1, PLXNA2, PLXNA3, PLXNA4, RAC1, RND1, RRAS, SEMA3A, TLN1, VAV2]
GO:0000873	Semaphorin interactions	REACTOME_Pathways_09.11.2016	0.01	1	0.017	1	[-1]	Group295	64.7059	44	[CD72, CDC42, DPYSL2, DPYSL3, DPYSL4, ERBB2, HSP90AA1, HSP90AB1, ITGB1, LIMK1, MET, MYH10, MYH14, MYH9, MYL12A, MYL12B, MYL6, MYL9, NRP1, PAK1, PAK2, PLXNA1, PLXNA2, PLXNA3, PLXNA4, PLXNB1, PLXNB3, PLXND1, PTPRC, RAC1, RAC2, RHOA, RHOB, RHOG, RND1, ROCK1, ROCK2, RRAS, SEMA3A, SEMA3E, SEMA5A, TLN1, TREM2, TYROBP]
GO:0000973	Sema3A PAK dependent Axon repulsion	REACTOME_Pathways_09.11.2016	0.083	1	0.017	1	[-1]	Group295	63.4146	26	[CSNK2A1, CSNK2A2, EGFR, HSP90AA1, HSP90AB1, ITGA2B, ITGA5, ITGAV, ITGB1, LIMK1, MAP2K1, MAPK3, NCAM1, NRP1, PAK1, PAK2, PLXNA1, PLXNA2, PLXNA3, PLXNA4, RAC1, RND1, RRAS, SEMA3A, TLN1, VAV2]
GO:0000974	SEMA3A-Plexin repulsion signaling by inhibiting Integrin adhesion	REACTOME_Pathways_09.11.2016	0.083	1	0.017	1	[-1]	Group295	63.4146	26	[CSNK2A1, CSNK2A2, EGFR, HSP90AA1, HSP90AB1, ITGA2B, ITGA5, ITGAV, ITGB1, LIMK1, MAP2K1, MAPK3, NCAM1, NRP1, PAK1, PAK2, PLXNA1, PLXNA2, PLXNA3, PLXNA4, RAC1, RND1, RRAS, SEMA3A, TLN1, VAV2]
GO:0000975	CRMPs in Sema3A signaling	REACTOME_Pathways_09.11.2016	0.01	1	0.017	1	[-1]	Group295	64.7059	44	[CD72, CDC42, DPYSL2, DPYSL3, DPYSL4, ERBB2, HSP90AA1, HSP90AB1, ITGB1, LIMK1, MET, MYH10, MYH14, MYH9, MYL12A, MYL12B, MYL6, MYL9, NRP1, PAK1, PAK2, PLXNA1, PLXNA2, PLXNA3, PLXNA4, PLXNB1, PLXNB3, PLXND1, PTPRC, RAC1, RAC2, RHOA, RHOB, RHOG, RND1, ROCK1, ROCK2, RRAS, SEMA3A, SEMA3E, SEMA5A, TLN1, TREM2, TYROBP]
GO:0000991	Other semaphorin interactions	REACTOME_Pathways_09.11.2016	0.25	1	0.017	1	[-1]	Group295	63.1579	12	[CD72, ITGB1, PLXNA1, PLXNA2, PLXNA4, PLXNB3, PLXND1, PTPRC, SEMA3E, SEMA5A, TREM2, TYROBP]
GO:0001093	Signal transduction by L1	REACTOME_Pathways_09.11.2016	0.083	1	0.017	1	[-1]	Group295	63.4146	26	[CSNK2A1, CSNK2A2, EGFR, HSP90AA1, HSP90AB1, ITGA2B, ITGA5, ITGAV, ITGB1, LIMK1, MAP2K1, MAPK3, NCAM1, NRP1, PAK1, PAK2, PLXNA1, PLXNA2, PLXNA3, PLXNA4, RAC1, RND1, RRAS, SEMA3A, TLN1, VAV2]
GO:0000004	Cleavage of Growing Transcript in the Termination Region	REACTOME_Pathways_09.11.2016	1.3e-06	0.00041	1.3e-06	0.0003	[-1]	Group296	64.4068	152	[AAAS, ALYREF, AQR, BCAS2, BUD31, CASC3, CCAR1, CDC5L, CHTOP, CPSF1, CPSF3, CPSF4, CPSF7, CSTF1, CSTF3, CWC22, CWC25, CWC27, DDX23, DDX39A, DHX15, DNAJC8, EFTUD2, EIF4A3, EIF4E, ELAVL1, FIP1L1, FYTTD1, GCFC2, GTF2F1, GTF2F2, HNRNPA0, HNRNPA1, HNRNPA2B1, HNRNPA3, HNRNPC, HNRNPD, HNRNPF, HNRNPH1, HNRNPH2, HNRNPK, HNRNPL, HNRNPM, HNRNPR, HNRNPU, ISY1, LSM2, LSM3, LSM5, LSM6, LSM7, LSM8, MAGOHB, METT…
GO:0000228	Transport of Mature mRNA derived from an Intron-Containing Transcript	REACTOME_Pathways_09.11.2016	1.3e-06	0.00041	1.3e-06	0.0003	[-1]	Group296	64.4068	152	[AAAS, ALYREF, AQR, BCAS2, BUD31, CASC3, CCAR1, CDC5L, CHTOP, CPSF1, CPSF3, CPSF4, CPSF7, CSTF1, CSTF3, CWC22, CWC25, CWC27, DDX23, DDX39A, DHX15, DNAJC8, EFTUD2, EIF4A3, EIF4E, ELAVL1, FIP1L1, FYTTD1, GCFC2, GTF2F1, GTF2F2, HNRNPA0, HNRNPA1, HNRNPA2B1, HNRNPA3, HNRNPC, HNRNPD, HNRNPF, HNRNPH1, HNRNPH2, HNRNPK, HNRNPL, HNRNPM, HNRNPR, HNRNPU, ISY1, LSM2, LSM3, LSM5, LSM6, LSM7, LSM8, MAGOHB, METT…
GO:0001597	mRNA Splicing - Major Pathway	REACTOME_Pathways_09.11.2016	5.4e-05	0.016	1.3e-06	0.0003	[-1]	Group296	63.7838	118	[ALYREF, AQR, BCAS2, BUD31, CASC3, CCAR1, CDC5L, CPSF1, CPSF3, CPSF4, CPSF7, CSTF1, CSTF3, CWC22, CWC25, CWC27, DDX23, DHX15, DNAJC8, EFTUD2, EIF4A3, ELAVL1, FIP1L1, GCFC2, GTF2F1, GTF2F2, HNRNPA0, HNRNPA1, HNRNPA2B1, HNRNPA3, HNRNPC, HNRNPD, HNRNPF, HNRNPH1, HNRNPH2, HNRNPK, HNRNPL, HNRNPM, HNRNPR, HNRNPU, ISY1, LSM2, LSM3, LSM5, LSM6, LSM7, LSM8, MAGOHB, NCBP1, NCBP2, NUDT21, PCBP1, PCBP2, PDCD…
GO:0001599	mRNA Splicing	REACTOME_Pathways_09.11.2016	5.4e-05	0.016	1.3e-06	0.0003	[-1]	Group296	63.7838	118	[ALYREF, AQR, BCAS2, BUD31, CASC3, CCAR1, CDC5L, CPSF1, CPSF3, CPSF4, CPSF7, CSTF1, CSTF3, CWC22, CWC25, CWC27, DDX23, DHX15, DNAJC8, EFTUD2, EIF4A3, ELAVL1, FIP1L1, GCFC2, GTF2F1, GTF2F2, HNRNPA0, HNRNPA1, HNRNPA2B1, HNRNPA3, HNRNPC, HNRNPD, HNRNPF, HNRNPH1, HNRNPH2, HNRNPK, HNRNPL, HNRNPM, HNRNPR, HNRNPU, ISY1, LSM2, LSM3, LSM5, LSM6, LSM7, LSM8, MAGOHB, NCBP1, NCBP2, NUDT21, PCBP1, PCBP2, PDCD…
GO:0001600	mRNA 3'-end processing	REACTOME_Pathways_09.11.2016	1.3e-06	0.00041	1.3e-06	0.0003	[-1]	Group296	64.4068	152	[AAAS, ALYREF, AQR, BCAS2, BUD31, CASC3, CCAR1, CDC5L, CHTOP, CPSF1, CPSF3, CPSF4, CPSF7, CSTF1, CSTF3, CWC22, CWC25, CWC27, DDX23, DDX39A, DHX15, DNAJC8, EFTUD2, EIF4A3, EIF4E, ELAVL1, FIP1L1, FYTTD1, GCFC2, GTF2F1, GTF2F2, HNRNPA0, HNRNPA1, HNRNPA2B1, HNRNPA3, HNRNPC, HNRNPD, HNRNPF, HNRNPH1, HNRNPH2, HNRNPK, HNRNPL, HNRNPM, HNRNPR, HNRNPU, ISY1, LSM2, LSM3, LSM5, LSM6, LSM7, LSM8, MAGOHB, METT…
GO:0001602	Transport of Mature Transcript to Cytoplasm	REACTOME_Pathways_09.11.2016	1.3e-06	0.00041	1.3e-06	0.0003	[-1]	Group296	64.4068	152	[AAAS, ALYREF, AQR, BCAS2, BUD31, CASC3, CCAR1, CDC5L, CHTOP, CPSF1, CPSF3, CPSF4, CPSF7, CSTF1, CSTF3, CWC22, CWC25, CWC27, DDX23, DDX39A, DHX15, DNAJC8, EFTUD2, EIF4A3, EIF4E, ELAVL1, FIP1L1, FYTTD1, GCFC2, GTF2F1, GTF2F2, HNRNPA0, HNRNPA1, HNRNPA2B1, HNRNPA3, HNRNPC, HNRNPD, HNRNPF, HNRNPH1, HNRNPH2, HNRNPK, HNRNPL, HNRNPM, HNRNPR, HNRNPU, ISY1, LSM2, LSM3, LSM5, LSM6, LSM7, LSM8, MAGOHB, METT…
GO:0001603	Processing of Capped Intron-Containing Pre-mRNA	REACTOME_Pathways_09.11.2016	1.3e-06	0.00041	1.3e-06	0.0003	[-1]	Group296	64.4068	152	[AAAS, ALYREF, AQR, BCAS2, BUD31, CASC3, CCAR1, CDC5L, CHTOP, CPSF1, CPSF3, CPSF4, CPSF7, CSTF1, CSTF3, CWC22, CWC25, CWC27, DDX23, DDX39A, DHX15, DNAJC8, EFTUD2, EIF4A3, EIF4E, ELAVL1, FIP1L1, FYTTD1, GCFC2, GTF2F1, GTF2F2, HNRNPA0, HNRNPA1, HNRNPA2B1, HNRNPA3, HNRNPC, HNRNPD, HNRNPF, HNRNPH1, HNRNPH2, HNRNPK, HNRNPL, HNRNPM, HNRNPR, HNRNPU, ISY1, LSM2, LSM3, LSM5, LSM6, LSM7, LSM8, MAGOHB, METT…
GO:0001632	RNA Polymerase II Transcription Termination	REACTOME_Pathways_09.11.2016	1.3e-06	0.00041	1.3e-06	0.0003	[-1]	Group296	64.4068	152	[AAAS, ALYREF, AQR, BCAS2, BUD31, CASC3, CCAR1, CDC5L, CHTOP, CPSF1, CPSF3, CPSF4, CPSF7, CSTF1, CSTF3, CWC22, CWC25, CWC27, DDX23, DDX39A, DHX15, DNAJC8, EFTUD2, EIF4A3, EIF4E, ELAVL1, FIP1L1, FYTTD1, GCFC2, GTF2F1, GTF2F2, HNRNPA0, HNRNPA1, HNRNPA2B1, HNRNPA3, HNRNPC, HNRNPD, HNRNPF, HNRNPH1, HNRNPH2, HNRNPK, HNRNPL, HNRNPM, HNRNPR, HNRNPU, ISY1, LSM2, LSM3, LSM5, LSM6, LSM7, LSM8, MAGOHB, METT…
GO:0000451	Organelle biogenesis and maintenance	REACTOME_Pathways_09.11.2016	0.003	0.86	0.0038	0.77	[-1]	Group297	56.8116	196	[AHI1, AKAP9, ALMS1, ARF4, ARL13B, ARL6, ASAP1, ATAT1, B9D2, BBIP1, BBS10, BBS12, BBS2, BBS4, BBS5, BBS9, CC2D2A, CCT2, CCT4, CDK5RAP2, CEP131, CEP152, CEP162, CEP192, CEP290, CEP41, CEP63, CEP72, CEP83, CHCHD1, CHD9, CKAP5, CLASP1, CNGA2, CNGA4, CNGB1, CREB1, CREBBP, CRTC1, CRTC2, CRTC3, CSNK1E, CYCS, CYS1, DCTN3, DYNC1H1, DYNC1I2, DYNC2H1, DYNLL1, DYNLL2, ESRRA, EXOC7, GABPA, GFM1, GFM2, HAUS1,…
GO:0000741	Regulation of PLK1 Activity at G2/M Transition	REACTOME_Pathways_09.11.2016	0.15	1	0.0038	0.77	[-1]	Group297	55.6522	64	[AHI1, AKAP9, ALMS1, B9D2, BORA, BTRC, CC2D2A, CDK5RAP2, CEP131, CEP152, CEP162, CEP192, CEP290, CEP41, CEP63, CEP72, CEP83, CKAP5, CLASP1, CSNK1E, DCTN3, DYNC1H1, DYNC1I2, DYNLL1, FBXW11, HAUS1, HAUS4, HAUS6, HAUS7, HAUS8, HMMR, HSP90AA1, IQCB1, MAPRE1, MARK4, NDE1, NEDD1, NINL, NPHP4, ODF2, OFD1, OPTN, PAFAH1B1, PCM1, PCNT, PPP1CB, PPP1R12A, PRKACA, PRKAR2B, RAB11A, SFI1, SKP1, SSNA1, TCTN1, TC…
GO:0000894	Loss of Nlp from mitotic centrosomes	REACTOME_Pathways_09.11.2016	0.15	1	0.0038	0.77	[-1]	Group297	55.6522	64	[AHI1, AKAP9, ALMS1, B9D2, BORA, BTRC, CC2D2A, CDK5RAP2, CEP131, CEP152, CEP162, CEP192, CEP290, CEP41, CEP63, CEP72, CEP83, CKAP5, CLASP1, CSNK1E, DCTN3, DYNC1H1, DYNC1I2, DYNLL1, FBXW11, HAUS1, HAUS4, HAUS6, HAUS7, HAUS8, HMMR, HSP90AA1, IQCB1, MAPRE1, MARK4, NDE1, NEDD1, NINL, NPHP4, ODF2, OFD1, OPTN, PAFAH1B1, PCM1, PCNT, PPP1CB, PPP1R12A, PRKACA, PRKAR2B, RAB11A, SFI1, SKP1, SSNA1, TCTN1, TC…
GO:0000896	Loss of proteins required for interphase microtubule organization from the centrosome	REACTOME_Pathways_09.11.2016	0.15	1	0.0038	0.77	[-1]	Group297	55.6522	64	[AHI1, AKAP9, ALMS1, B9D2, BORA, BTRC, CC2D2A, CDK5RAP2, CEP131, CEP152, CEP162, CEP192, CEP290, CEP41, CEP63, CEP72, CEP83, CKAP5, CLASP1, CSNK1E, DCTN3, DYNC1H1, DYNC1I2, DYNLL1, FBXW11, HAUS1, HAUS4, HAUS6, HAUS7, HAUS8, HMMR, HSP90AA1, IQCB1, MAPRE1, MARK4, NDE1, NEDD1, NINL, NPHP4, ODF2, OFD1, OPTN, PAFAH1B1, PCM1, PCNT, PPP1CB, PPP1R12A, PRKACA, PRKAR2B, RAB11A, SFI1, SKP1, SSNA1, TCTN1, TC…
GO:0001275	Assembly of the primary cilium	REACTOME_Pathways_09.11.2016	0.003	0.86	0.0038	0.77	[-1]	Group297	56.8116	196	[AHI1, AKAP9, ALMS1, ARF4, ARL13B, ARL6, ASAP1, ATAT1, B9D2, BBIP1, BBS10, BBS12, BBS2, BBS4, BBS5, BBS9, CC2D2A, CCT2, CCT4, CDK5RAP2, CEP131, CEP152, CEP162, CEP192, CEP290, CEP41, CEP63, CEP72, CEP83, CHCHD1, CHD9, CKAP5, CLASP1, CNGA2, CNGA4, CNGB1, CREB1, CREBBP, CRTC1, CRTC2, CRTC3, CSNK1E, CYCS, CYS1, DCTN3, DYNC1H1, DYNC1I2, DYNC2H1, DYNLL1, DYNLL2, ESRRA, EXOC7, GABPA, GFM1, GFM2, HAUS1,…
GO:0001284	Anchoring of the basal body to the plasma membrane	REACTOME_Pathways_09.11.2016	0.15	1	0.0038	0.77	[-1]	Group297	55.6522	64	[AHI1, AKAP9, ALMS1, B9D2, BORA, BTRC, CC2D2A, CDK5RAP2, CEP131, CEP152, CEP162, CEP192, CEP290, CEP41, CEP63, CEP72, CEP83, CKAP5, CLASP1, CSNK1E, DCTN3, DYNC1H1, DYNC1I2, DYNLL1, FBXW11, HAUS1, HAUS4, HAUS6, HAUS7, HAUS8, HMMR, HSP90AA1, IQCB1, MAPRE1, MARK4, NDE1, NEDD1, NINL, NPHP4, ODF2, OFD1, OPTN, PAFAH1B1, PCM1, PCNT, PPP1CB, PPP1R12A, PRKACA, PRKAR2B, RAB11A, SFI1, SKP1, SSNA1, TCTN1, TC…
GO:0001288	Intraflagellar transport	REACTOME_Pathways_09.11.2016	0.003	0.86	0.0038	0.77	[-1]	Group297	56.8116	196	[AHI1, AKAP9, ALMS1, ARF4, ARL13B, ARL6, ASAP1, ATAT1, B9D2, BBIP1, BBS10, BBS12, BBS2, BBS4, BBS5, BBS9, CC2D2A, CCT2, CCT4, CDK5RAP2, CEP131, CEP152, CEP162, CEP192, CEP290, CEP41, CEP63, CEP72, CEP83, CHCHD1, CHD9, CKAP5, CLASP1, CNGA2, CNGA4, CNGB1, CREB1, CREBBP, CRTC1, CRTC2, CRTC3, CSNK1E, CYCS, CYS1, DCTN3, DYNC1H1, DYNC1I2, DYNC2H1, DYNLL1, DYNLL2, ESRRA, EXOC7, GABPA, GFM1, GFM2, HAUS1,…
GO:0001745	AURKA Activation by TPX2	REACTOME_Pathways_09.11.2016	0.15	1	0.0038	0.77	[-1]	Group297	55.6522	64	[AHI1, AKAP9, ALMS1, B9D2, BORA, BTRC, CC2D2A, CDK5RAP2, CEP131, CEP152, CEP162, CEP192, CEP290, CEP41, CEP63, CEP72, CEP83, CKAP5, CLASP1, CSNK1E, DCTN3, DYNC1H1, DYNC1I2, DYNLL1, FBXW11, HAUS1, HAUS4, HAUS6, HAUS7, HAUS8, HMMR, HSP90AA1, IQCB1, MAPRE1, MARK4, NDE1, NEDD1, NINL, NPHP4, ODF2, OFD1, OPTN, PAFAH1B1, PCM1, PCNT, PPP1CB, PPP1R12A, PRKACA, PRKAR2B, RAB11A, SFI1, SKP1, SSNA1, TCTN1, TC…
GO:0000361	Neurotoxicity of clostridium toxins	REACTOME_Pathways_09.11.2016	0.54	1	0.23	1	[-1]	Group298	60	6	[SNAP25, STX1A, SV2A, SYT1, SYT2, VAMP2]
GO:0000437	Serotonin Neurotransmitter Release Cycle	REACTOME_Pathways_09.11.2016	1	1	0.23	1	[-1]	Group298	50	14	[APBA1, CASK, CPLX1, LIN7B, PPFIA1, PPFIA4, SLC18A3, SNAP25, STX1A, SYN1, SYN3, SYT1, UNC13B, VAMP2]
GO:0000438	Norepinephrine Neurotransmitter Release Cycle	REACTOME_Pathways_09.11.2016	1	1	0.23	1	[-1]	Group298	50	14	[APBA1, CASK, CPLX1, LIN7B, PPFIA1, PPFIA4, SLC18A3, SNAP25, STX1A, SYN1, SYN3, SYT1, UNC13B, VAMP2]
GO:0000657	Dopamine Neurotransmitter Release Cycle	REACTOME_Pathways_09.11.2016	1	1	0.23	1	[-1]	Group298	50	14	[APBA1, CASK, CPLX1, LIN7B, PPFIA1, PPFIA4, SLC18A3, SNAP25, STX1A, SYN1, SYN3, SYT1, UNC13B, VAMP2]
GO:0000748	Acetylcholine Neurotransmitter Release Cycle	REACTOME_Pathways_09.11.2016	1	1	0.23	1	[-1]	Group298	50	14	[APBA1, CASK, CPLX1, LIN7B, PPFIA1, PPFIA4, SLC18A3, SNAP25, STX1A, SYN1, SYN3, SYT1, UNC13B, VAMP2]
GO:0001185	Toxicity of botulinum toxin type B (BoNT/B)	REACTOME_Pathways_09.11.2016	0.54	1	0.23	1	[-1]	Group298	60	6	[SNAP25, STX1A, SV2A, SYT1, SYT2, VAMP2]
GO:0001190	Toxicity of botulinum toxin type G (BoNT/G)	REACTOME_Pathways_09.11.2016	0.54	1	0.23	1	[-1]	Group298	60	6	[SNAP25, STX1A, SV2A, SYT1, SYT2, VAMP2]
GO:0001778	GABA synthesis, release, reuptake and degradation	REACTOME_Pathways_09.11.2016	0.48	1	0.23	1	[-1]	Group298	38.8889	7	[ABAT, CPLX1, DNAJC5, SNAP25, STX1A, SYT1, VAMP2]
GO:0000574	Metabolism of nitric oxide	REACTOME_Pathways_09.11.2016	0.022	1	0.022	1	[-1]	Group299	57.8313	96	[ABLIM2, ABLIM3, ACTB, ACTG1, ACTN2, ACTR2, ACTR3, ADAM10, AKT1, AP2B1, AP2M1, AP2S1, APH1A, APH1B, ARHGEF7, ARPC1B, ARPC2, ARPC5, CALM1, CALM2, CALM3, CASK, CAV1, CD2AP, CDC42, CLTA, CLTB, CYGB, DHFR, DNM1, DOCK1, EFNA5, EPHA10, EPHA3, EPHA7, EPHA8, EPHB2, EZR, GCH1, HSP90AA1, IQGAP1, KALRN, KIRREL2, KIRREL3, LIMK1, LYN, LYPLA1, MAGI2, MMP2, MYH10, MYH14, MYH9, MYL12A, MYL12B, MYL6, MYL9, NCK1, …
GO:0000602	NOSTRIN mediated eNOS trafficking	REACTOME_Pathways_09.11.2016	0.022	1	0.022	1	[-1]	Group299	57.8313	96	[ABLIM2, ABLIM3, ACTB, ACTG1, ACTN2, ACTR2, ACTR3, ADAM10, AKT1, AP2B1, AP2M1, AP2S1, APH1A, APH1B, ARHGEF7, ARPC1B, ARPC2, ARPC5, CALM1, CALM2, CALM3, CASK, CAV1, CD2AP, CDC42, CLTA, CLTB, CYGB, DHFR, DNM1, DOCK1, EFNA5, EPHA10, EPHA3, EPHA7, EPHA8, EPHB2, EZR, GCH1, HSP90AA1, IQGAP1, KALRN, KIRREL2, KIRREL3, LIMK1, LYN, LYPLA1, MAGI2, MMP2, MYH10, MYH14, MYH9, MYL12A, MYL12B, MYL6, MYL9, NCK1, …
GO:0000604	eNOS activation and regulation	REACTOME_Pathways_09.11.2016	0.022	1	0.022	1	[-1]	Group299	57.8313	96	[ABLIM2, ABLIM3, ACTB, ACTG1, ACTN2, ACTR2, ACTR3, ADAM10, AKT1, AP2B1, AP2M1, AP2S1, APH1A, APH1B, ARHGEF7, ARPC1B, ARPC2, ARPC5, CALM1, CALM2, CALM3, CASK, CAV1, CD2AP, CDC42, CLTA, CLTB, CYGB, DHFR, DNM1, DOCK1, EFNA5, EPHA10, EPHA3, EPHA7, EPHA8, EPHB2, EZR, GCH1, HSP90AA1, IQGAP1, KALRN, KIRREL2, KIRREL3, LIMK1, LYN, LYPLA1, MAGI2, MMP2, MYH10, MYH14, MYH9, MYL12A, MYL12B, MYL6, MYL9, NCK1, …
GO:0000755	EPH-Ephrin signaling	REACTOME_Pathways_09.11.2016	0.022	1	0.022	1	[-1]	Group299	57.8313	96	[ABLIM2, ABLIM3, ACTB, ACTG1, ACTN2, ACTR2, ACTR3, ADAM10, AKT1, AP2B1, AP2M1, AP2S1, APH1A, APH1B, ARHGEF7, ARPC1B, ARPC2, ARPC5, CALM1, CALM2, CALM3, CASK, CAV1, CD2AP, CDC42, CLTA, CLTB, CYGB, DHFR, DNM1, DOCK1, EFNA5, EPHA10, EPHA3, EPHA7, EPHA8, EPHB2, EZR, GCH1, HSP90AA1, IQGAP1, KALRN, KIRREL2, KIRREL3, LIMK1, LYN, LYPLA1, MAGI2, MMP2, MYH10, MYH14, MYH9, MYL12A, MYL12B, MYL6, MYL9, NCK1, …
GO:0000871	Netrin-1 signaling	REACTOME_Pathways_09.11.2016	0.022	1	0.022	1	[-1]	Group299	57.8313	96	[ABLIM2, ABLIM3, ACTB, ACTG1, ACTN2, ACTR2, ACTR3, ADAM10, AKT1, AP2B1, AP2M1, AP2S1, APH1A, APH1B, ARHGEF7, ARPC1B, ARPC2, ARPC5, CALM1, CALM2, CALM3, CASK, CAV1, CD2AP, CDC42, CLTA, CLTB, CYGB, DHFR, DNM1, DOCK1, EFNA5, EPHA10, EPHA3, EPHA7, EPHA8, EPHB2, EZR, GCH1, HSP90AA1, IQGAP1, KALRN, KIRREL2, KIRREL3, LIMK1, LYN, LYPLA1, MAGI2, MMP2, MYH10, MYH14, MYH9, MYL12A, MYL12B, MYL6, MYL9, NCK1, …
GO:0000872	Nephrin interactions	REACTOME_Pathways_09.11.2016	0.022	1	0.022	1	[-1]	Group299	57.8313	96	[ABLIM2, ABLIM3, ACTB, ACTG1, ACTN2, ACTR2, ACTR3, ADAM10, AKT1, AP2B1, AP2M1, AP2S1, APH1A, APH1B, ARHGEF7, ARPC1B, ARPC2, ARPC5, CALM1, CALM2, CALM3, CASK, CAV1, CD2AP, CDC42, CLTA, CLTB, CYGB, DHFR, DNM1, DOCK1, EFNA5, EPHA10, EPHA3, EPHA7, EPHA8, EPHB2, EZR, GCH1, HSP90AA1, IQGAP1, KALRN, KIRREL2, KIRREL3, LIMK1, LYN, LYPLA1, MAGI2, MMP2, MYH10, MYH14, MYH9, MYL12A, MYL12B, MYL6, MYL9, NCK1, …
GO:0000964	EPHB-mediated forward signaling	REACTOME_Pathways_09.11.2016	0.022	1	0.022	1	[-1]	Group299	57.8313	96	[ABLIM2, ABLIM3, ACTB, ACTG1, ACTN2, ACTR2, ACTR3, ADAM10, AKT1, AP2B1, AP2M1, AP2S1, APH1A, APH1B, ARHGEF7, ARPC1B, ARPC2, ARPC5, CALM1, CALM2, CALM3, CASK, CAV1, CD2AP, CDC42, CLTA, CLTB, CYGB, DHFR, DNM1, DOCK1, EFNA5, EPHA10, EPHA3, EPHA7, EPHA8, EPHB2, EZR, GCH1, HSP90AA1, IQGAP1, KALRN, KIRREL2, KIRREL3, LIMK1, LYN, LYPLA1, MAGI2, MMP2, MYH10, MYH14, MYH9, MYL12A, MYL12B, MYL6, MYL9, NCK1, …
GO:0001005	DCC mediated attractive signaling	REACTOME_Pathways_09.11.2016	0.022	1	0.022	1	[-1]	Group299	57.8313	96	[ABLIM2, ABLIM3, ACTB, ACTG1, ACTN2, ACTR2, ACTR3, ADAM10, AKT1, AP2B1, AP2M1, AP2S1, APH1A, APH1B, ARHGEF7, ARPC1B, ARPC2, ARPC5, CALM1, CALM2, CALM3, CASK, CAV1, CD2AP, CDC42, CLTA, CLTB, CYGB, DHFR, DNM1, DOCK1, EFNA5, EPHA10, EPHA3, EPHA7, EPHA8, EPHB2, EZR, GCH1, HSP90AA1, IQGAP1, KALRN, KIRREL2, KIRREL3, LIMK1, LYN, LYPLA1, MAGI2, MMP2, MYH10, MYH14, MYH9, MYL12A, MYL12B, MYL6, MYL9, NCK1, …
GO:0000567	trans-Golgi Network Vesicle Budding	REACTOME_Pathways_09.11.2016	0.19	1	0.0046	0.93	[-1]	Group300	56.9444	41	[ACBD3, AP1B1, AP1G1, AP1M1, AP1S2, AP3S1, AP4E1, APP, BLOC1S3, BLOC1S4, BLOC1S6, CLINT1, CLTA, CLTB, CTSZ, DNAJC6, DNASE2, DTNBP1, FTH1, GNS, HGS, IGF2R, NECAP1, OCRL, PICALM, PIK3C2A, PUM1, SH3D19, SNAP23, SNAPIN, SNX5, SORT1, STX4, TBC1D8B, TGOLN2, TPD52, TXNDC5, VAMP2, VAMP7, VAMP8, YIPF6]
GO:0001019	Clathrin derived vesicle budding	REACTOME_Pathways_09.11.2016	0.19	1	0.0046	0.93	[-1]	Group300	56.9444	41	[ACBD3, AP1B1, AP1G1, AP1M1, AP1S2, AP3S1, AP4E1, APP, BLOC1S3, BLOC1S4, BLOC1S6, CLINT1, CLTA, CLTB, CTSZ, DNAJC6, DNASE2, DTNBP1, FTH1, GNS, HGS, IGF2R, NECAP1, OCRL, PICALM, PIK3C2A, PUM1, SH3D19, SNAP23, SNAPIN, SNX5, SORT1, STX4, TBC1D8B, TGOLN2, TPD52, TXNDC5, VAMP2, VAMP7, VAMP8, YIPF6]
GO:0001064	Lysosome Vesicle Biogenesis	REACTOME_Pathways_09.11.2016	0.19	1	0.0046	0.93	[-1]	Group300	56.9444	41	[ACBD3, AP1B1, AP1G1, AP1M1, AP1S2, AP3S1, AP4E1, APP, BLOC1S3, BLOC1S4, BLOC1S6, CLINT1, CLTA, CLTB, CTSZ, DNAJC6, DNASE2, DTNBP1, FTH1, GNS, HGS, IGF2R, NECAP1, OCRL, PICALM, PIK3C2A, PUM1, SH3D19, SNAP23, SNAPIN, SNX5, SORT1, STX4, TBC1D8B, TGOLN2, TPD52, TXNDC5, VAMP2, VAMP7, VAMP8, YIPF6]
GO:0001065	Golgi Associated Vesicle Biogenesis	REACTOME_Pathways_09.11.2016	0.005	1	0.0046	0.93	[-1]	Group300	61.6	77	[ACBD3, ACTB, ACTG1, AGGF1, AGTRAP, AKAP9, AP1B1, AP1G1, AP1M1, AP1S2, AP3S1, AP4E1, APBB1IP, ARAF, BCL2L11, BLOC1S3, BLOC1S4, BLOC1S6, BRAF, CLCN6, CLINT1, CNKSR1, CSK, DNAJC6, DTNBP1, FAM114A2, FN1, FTH1, FXR1, IGF2R, IQGAP1, ITGA2B, JAK2, KIAA1549, KRAS, LMNA, MACF1, MAP2K1, MAPK3, MARK3, NECAP1, NF1, NRAS, OCRL, PAPD7, PAPSS1, PEBP1, PICALM, PIK3C2A, PUM1, QKI, RAP1A, RAP1B, RASA1, RASA3, RAS…
GO:0001471	Signaling by RAS mutants	REACTOME_Pathways_09.11.2016	0.097	1	0.0046	0.93	[-1]	Group300	59.6774	37	[ACTB, ACTG1, APBB1IP, ARAF, BCAR1, BRAF, CNKSR1, CSK, DOCK1, ELMO1, ELMO2, FN1, IQGAP1, ITGA2B, JAK2, KRAS, MAP2K1, MAPK3, MARK3, NF1, NRAS, PEBP1, RAC1, RAP1A, RAP1B, RASA1, RASA3, RASA4, RASAL1, RHOA, SPRED1, SPRED3, SYNGAP1, TLN1, VCL, VWF, YWHAB]
GO:0001472	Signaling by BRAF and RAF fusions	REACTOME_Pathways_09.11.2016	0.005	1	0.0046	0.93	[-1]	Group300	61.6	77	[ACBD3, ACTB, ACTG1, AGGF1, AGTRAP, AKAP9, AP1B1, AP1G1, AP1M1, AP1S2, AP3S1, AP4E1, APBB1IP, ARAF, BCL2L11, BLOC1S3, BLOC1S4, BLOC1S6, BRAF, CLCN6, CLINT1, CNKSR1, CSK, DNAJC6, DTNBP1, FAM114A2, FN1, FTH1, FXR1, IGF2R, IQGAP1, ITGA2B, JAK2, KIAA1549, KRAS, LMNA, MACF1, MAP2K1, MAPK3, MARK3, NECAP1, NF1, NRAS, OCRL, PAPD7, PAPSS1, PEBP1, PICALM, PIK3C2A, PUM1, QKI, RAP1A, RAP1B, RASA1, RASA3, RAS…
GO:0001475	Oncogenic MAPK signaling	REACTOME_Pathways_09.11.2016	0.005	1	0.0046	0.93	[-1]	Group300	61.6	77	[ACBD3, ACTB, ACTG1, AGGF1, AGTRAP, AKAP9, AP1B1, AP1G1, AP1M1, AP1S2, AP3S1, AP4E1, APBB1IP, ARAF, BCL2L11, BLOC1S3, BLOC1S4, BLOC1S6, BRAF, CLCN6, CLINT1, CNKSR1, CSK, DNAJC6, DTNBP1, FAM114A2, FN1, FTH1, FXR1, IGF2R, IQGAP1, ITGA2B, JAK2, KIAA1549, KRAS, LMNA, MACF1, MAP2K1, MAPK3, MARK3, NECAP1, NF1, NRAS, OCRL, PAPD7, PAPSS1, PEBP1, PICALM, PIK3C2A, PUM1, QKI, RAP1A, RAP1B, RASA1, RASA3, RAS…
GO:0001726	PTK6 Regulates RHO GTPases, RAS GTPase and MAP kinases	REACTOME_Pathways_09.11.2016	0.097	1	0.0046	0.93	[-1]	Group300	59.6774	37	[ACTB, ACTG1, APBB1IP, ARAF, BCAR1, BRAF, CNKSR1, CSK, DOCK1, ELMO1, ELMO2, FN1, IQGAP1, ITGA2B, JAK2, KRAS, MAP2K1, MAPK3, MARK3, NF1, NRAS, PEBP1, RAC1, RAP1A, RAP1B, RASA1, RASA3, RASA4, RASAL1, RHOA, SPRED1, SPRED3, SYNGAP1, TLN1, VCL, VWF, YWHAB]
GO:0001072	Post NMDA receptor activation events	REACTOME_Pathways_09.11.2016	0.27	1	0.62	1	[-1]	Group301	58.5366	24	[ACTN2, ADCY1, AKAP9, BRAF, CALM1, CALM2, CALM3, CAMK2A, CAMK2G, CAMK4, CAMKK1, CREB1, GRIA1, GRIA3, GRIN2A, GRIN2C, GRIN2D, PDPK1, PRKACA, PRKACB, RPS6KA1, RPS6KA2, RPS6KA3, RRAS]
GO:0001073	Unblocking of NMDA receptor, glutamate binding and activation	REACTOME_Pathways_09.11.2016	0.22	1	0.62	1	[-1]	Group301	60.6061	20	[ACTN2, AKAP9, CALM1, CALM2, CALM3, CAMK2A, CAMK2G, CREB1, DLG1, DLG3, FLOT2, GRIA1, GRIA3, GRIN2A, GRIN2C, GRIN2D, LRFN4, PTPRD, PTPRF, RTN3]
GO:0001082	CREB phosphorylation through the activation of CaMKII	REACTOME_Pathways_09.11.2016	0.22	1	0.62	1	[-1]	Group301	60.6061	20	[ACTN2, AKAP9, CALM1, CALM2, CALM3, CAMK2A, CAMK2G, CREB1, DLG1, DLG3, FLOT2, GRIA1, GRIA3, GRIN2A, GRIN2C, GRIN2D, LRFN4, PTPRD, PTPRF, RTN3]
GO:0001083	CREB phosphorylation through the activation of Ras	REACTOME_Pathways_09.11.2016	0.27	1	0.62	1	[-1]	Group301	58.5366	24	[ACTN2, ADCY1, AKAP9, BRAF, CALM1, CALM2, CALM3, CAMK2A, CAMK2G, CAMK4, CAMKK1, CREB1, GRIA1, GRIA3, GRIN2A, GRIN2C, GRIN2D, PDPK1, PRKACA, PRKACB, RPS6KA1, RPS6KA2, RPS6KA3, RRAS]
GO:0001085	Activation of NMDA receptor upon glutamate binding and postsynaptic events	REACTOME_Pathways_09.11.2016	0.27	1	0.62	1	[-1]	Group301	58.5366	24	[ACTN2, ADCY1, AKAP9, BRAF, CALM1, CALM2, CALM3, CAMK2A, CAMK2G, CAMK4, CAMKK1, CREB1, GRIA1, GRIA3, GRIN2A, GRIN2C, GRIN2D, PDPK1, PRKACA, PRKACB, RPS6KA1, RPS6KA2, RPS6KA3, RRAS]
GO:0001086	Ras activation uopn Ca2+ infux through NMDA receptor	REACTOME_Pathways_09.11.2016	0.27	1	0.62	1	[-1]	Group301	58.5366	24	[ACTN2, ADCY1, AKAP9, BRAF, CALM1, CALM2, CALM3, CAMK2A, CAMK2G, CAMK4, CAMKK1, CREB1, GRIA1, GRIA3, GRIN2A, GRIN2C, GRIN2D, PDPK1, PRKACA, PRKACB, RPS6KA1, RPS6KA2, RPS6KA3, RRAS]
GO:0001462	Interactions of neurexins and neuroligins at synapses	REACTOME_Pathways_09.11.2016	0.9	1	0.62	1	[-1]	Group301	47.8873	34	[APBA1, BEGAIN, CASK, DBNL, DLG1, DLG3, DLGAP4, EPB41L1, EPB41L2, EPB41L3, EPB41L5, FLOT2, GRIA1, GRIA3, GRIN2A, GRIN2C, GRIN2D, HOMER3, LIN7B, LRFN4, LRRTM4, NLGN1, NLGN3, NLGN4Y, PDLIM5, PTPRD, PTPRF, RTN3, SHARPIN, SIPA1L1, STX1A, STXBP1, SYT1, SYT2]
GO:0001463	Protein-protein interactions at synapses	REACTOME_Pathways_09.11.2016	0.9	1	0.62	1	[-1]	Group301	47.8873	34	[APBA1, BEGAIN, CASK, DBNL, DLG1, DLG3, DLGAP4, EPB41L1, EPB41L2, EPB41L3, EPB41L5, FLOT2, GRIA1, GRIA3, GRIN2A, GRIN2C, GRIN2D, HOMER3, LIN7B, LRFN4, LRRTM4, NLGN1, NLGN3, NLGN4Y, PDLIM5, PTPRD, PTPRF, RTN3, SHARPIN, SIPA1L1, STX1A, STXBP1, SYT1, SYT2]
GO:0001730	SALM protein interactions at the synapses	REACTOME_Pathways_09.11.2016	0.22	1	0.62	1	[-1]	Group301	60.6061	20	[ACTN2, AKAP9, CALM1, CALM2, CALM3, CAMK2A, CAMK2G, CREB1, DLG1, DLG3, FLOT2, GRIA1, GRIA3, GRIN2A, GRIN2C, GRIN2D, LRFN4, PTPRD, PTPRF, RTN3]
GO:0000652	Epigenetic regulation of gene expression	REACTOME_Pathways_09.11.2016	0.00096	0.29	0.001	0.22	[-1]	Group302	57.8313	192	[ACTB, ACTL6A, ACTL6B, AEBP2, ARID1A, ARID1B, ARID2, ARID4A, ARID4B, ARID5B, ASH2L, ATF7IP, BRWD1, CBX3, CCND1, CD3EAP, CDK7, COPRS, CREBBP, DEK, DNMT1, DNMT3A, DNMT3B, DOT1L, DPY30, DR1, EED, EHMT1, EHMT2, ELP2, ELP3, ELP4, ELP5, ENY2, EP300, EP400, EPC1, ERCC2, EZH2, GATAD2B, GPS2, GTF2H4, H2AFV, H2AFX, H2AFZ, H3F3A, H3F3B, HAT1, HDAC1, HDAC2, HDAC3, HIST1H2AC, HIST1H2AE, HIST1H2AI, HIST1H2AL, …
GO:0000792	HDACs deacetylate histones	REACTOME_Pathways_09.11.2016	0.00096	0.29	0.001	0.22	[-1]	Group302	57.8313	192	[ACTB, ACTL6A, ACTL6B, AEBP2, ARID1A, ARID1B, ARID2, ARID4A, ARID4B, ARID5B, ASH2L, ATF7IP, BRWD1, CBX3, CCND1, CD3EAP, CDK7, COPRS, CREBBP, DEK, DNMT1, DNMT3A, DNMT3B, DOT1L, DPY30, DR1, EED, EHMT1, EHMT2, ELP2, ELP3, ELP4, ELP5, ENY2, EP300, EP400, EPC1, ERCC2, EZH2, GATAD2B, GPS2, GTF2H4, H2AFV, H2AFX, H2AFZ, H3F3A, H3F3B, HAT1, HDAC1, HDAC2, HDAC3, HIST1H2AC, HIST1H2AE, HIST1H2AI, HIST1H2AL, …
GO:0000795	HATs acetylate histones	REACTOME_Pathways_09.11.2016	0.86	1	0.001	0.22	[-1]	Group302	47.8873	68	[ACTB, ACTL6A, CREBBP, DR1, ELP2, ELP3, ELP4, ELP5, ENY2, EP300, EP400, EPC1, HAT1, HIST1H2AC, HIST1H2AE, HIST1H2AI, HIST1H2AL, HIST1H2BC, HIST1H2BL, HIST1H3A, HIST1H3B, HIST1H3C, HIST1H3D, HIST1H3E, HIST1H3G, HIST1H3J, HIST1H4A, HIST1H4B, HIST1H4C, HIST1H4K, HIST2H2AA4, HIST2H2BF, HIST2H3A, HIST2H3D, HIST3H2BB, HIST4H4, ING3, ING5, KANSL1, KANSL2, KAT2B, KAT8, MBIP, MEAF6, MORF4L1, MORF4L2, MSL1…
GO:0000801	Chromatin modifying enzymes	REACTOME_Pathways_09.11.2016	0.00096	0.29	0.001	0.22	[-1]	Group302	57.8313	192	[ACTB, ACTL6A, ACTL6B, AEBP2, ARID1A, ARID1B, ARID2, ARID4A, ARID4B, ARID5B, ASH2L, ATF7IP, BRWD1, CBX3, CCND1, CD3EAP, CDK7, COPRS, CREBBP, DEK, DNMT1, DNMT3A, DNMT3B, DOT1L, DPY30, DR1, EED, EHMT1, EHMT2, ELP2, ELP3, ELP4, ELP5, ENY2, EP300, EP400, EPC1, ERCC2, EZH2, GATAD2B, GPS2, GTF2H4, H2AFV, H2AFX, H2AFZ, H3F3A, H3F3B, HAT1, HDAC1, HDAC2, HDAC3, HIST1H2AC, HIST1H2AE, HIST1H2AI, HIST1H2AL, …
GO:0001035	SIRT1 negatively regulates rRNA Expression	REACTOME_Pathways_09.11.2016	0.46	1	0.001	0.22	[-1]	Group302	44.1176	30	[H2AFV, H2AFX, H2AFZ, H3F3A, H3F3B, HIST1H2AC, HIST1H2AE, HIST1H2BC, HIST1H2BL, HIST1H3A, HIST1H3B, HIST1H3C, HIST1H3D, HIST1H3E, HIST1H3G, HIST1H3J, HIST1H4A, HIST1H4B, HIST1H4C, HIST1H4K, HIST2H2AA4, HIST2H3A, HIST2H3D, HIST3H2BB, HIST4H4, RRP8, SUV39H1, TAF1C, TAF1D, TBP]
GO:0001037	NoRC negatively regulates rRNA expression	REACTOME_Pathways_09.11.2016	0.00096	0.29	0.001	0.22	[-1]	Group302	57.8313	192	[ACTB, ACTL6A, ACTL6B, AEBP2, ARID1A, ARID1B, ARID2, ARID4A, ARID4B, ARID5B, ASH2L, ATF7IP, BRWD1, CBX3, CCND1, CD3EAP, CDK7, COPRS, CREBBP, DEK, DNMT1, DNMT3A, DNMT3B, DOT1L, DPY30, DR1, EED, EHMT1, EHMT2, ELP2, ELP3, ELP4, ELP5, ENY2, EP300, EP400, EPC1, ERCC2, EZH2, GATAD2B, GPS2, GTF2H4, H2AFV, H2AFX, H2AFZ, H3F3A, H3F3B, HAT1, HDAC1, HDAC2, HDAC3, HIST1H2AC, HIST1H2AE, HIST1H2AI, HIST1H2AL, …
GO:0001148	Chromatin organization	REACTOME_Pathways_09.11.2016	0.00096	0.29	0.001	0.22	[-1]	Group302	57.8313	192	[ACTB, ACTL6A, ACTL6B, AEBP2, ARID1A, ARID1B, ARID2, ARID4A, ARID4B, ARID5B, ASH2L, ATF7IP, BRWD1, CBX3, CCND1, CD3EAP, CDK7, COPRS, CREBBP, DEK, DNMT1, DNMT3A, DNMT3B, DOT1L, DPY30, DR1, EED, EHMT1, EHMT2, ELP2, ELP3, ELP4, ELP5, ENY2, EP300, EP400, EPC1, ERCC2, EZH2, GATAD2B, GPS2, GTF2H4, H2AFV, H2AFX, H2AFZ, H3F3A, H3F3B, HAT1, HDAC1, HDAC2, HDAC3, HIST1H2AC, HIST1H2AE, HIST1H2AI, HIST1H2AL, …
GO:0001183	Negative epigenetic regulation of rRNA expression	REACTOME_Pathways_09.11.2016	0.00096	0.29	0.001	0.22	[-1]	Group302	57.8313	192	[ACTB, ACTL6A, ACTL6B, AEBP2, ARID1A, ARID1B, ARID2, ARID4A, ARID4B, ARID5B, ASH2L, ATF7IP, BRWD1, CBX3, CCND1, CD3EAP, CDK7, COPRS, CREBBP, DEK, DNMT1, DNMT3A, DNMT3B, DOT1L, DPY30, DR1, EED, EHMT1, EHMT2, ELP2, ELP3, ELP4, ELP5, ENY2, EP300, EP400, EPC1, ERCC2, EZH2, GATAD2B, GPS2, GTF2H4, H2AFV, H2AFX, H2AFZ, H3F3A, H3F3B, HAT1, HDAC1, HDAC2, HDAC3, HIST1H2AC, HIST1H2AE, HIST1H2AI, HIST1H2AL, …
GO:0001295	Activated PKN1 stimulates transcription of AR (androgen receptor) regulated genes KLK2 and KLK3	REACTOME_Pathways_09.11.2016	0.54	1	0.001	0.22	[-1]	Group302	44.7761	30	[H2AFV, H2AFX, H2AFZ, H3F3A, H3F3B, HIST1H2AC, HIST1H2AE, HIST1H2BC, HIST1H2BL, HIST1H3A, HIST1H3B, HIST1H3C, HIST1H3D, HIST1H3E, HIST1H3G, HIST1H3J, HIST1H4A, HIST1H4B, HIST1H4C, HIST1H4K, HIST2H2AA4, HIST2H3A, HIST2H3D, HIST3H2BB, HIST4H4, KDM1A, KDM4C, KLK2, NCOA2, PKN1]
GO:0000256	Glycosaminoglycan metabolism	REACTOME_Pathways_09.11.2016	0.068	1	0.068	1	[-1]	Group303	57.377	70	[ABCC5, AGRN, B3GNT2, B3GNT7, B4GALT2, B4GALT3, B4GALT6, B4GALT7, CD44, CEMIP, CHP1, CHPF, CHST1, CHST11, CHST12, CHST13, CHST15, CHST2, CHST3, CHST6, CHSY1, CHSY3, CSGALNACT1, CSGALNACT2, CSPG4, CSPG5, DCN, DSE, DSEL, EXT1, EXT2, FMOD, GLB1, GLB1L, GNS, GPC1, GPC3, GPC5, GUSB, HAS1, HAS2, HEXA, HGSNAT, HMMR, HPSE2, HS2ST1, HS3ST3B1, HS6ST1, HS6ST3, HSPG2, IDS, LUM, NDST1, OGN, OMD, PAPSS1, PAPSS…
GO:0000579	Chondroitin sulfate biosynthesis	REACTOME_Pathways_09.11.2016	0.27	1	0.068	1	[-1]	Group303	60	18	[CHPF, CHST11, CHST12, CHST13, CHST15, CHST3, CHSY1, CHSY3, CSGALNACT1, CSGALNACT2, CSPG4, CSPG5, DCN, DSE, DSEL, HEXA, IDS, VCAN]
GO:0000580	Dermatan sulfate biosynthesis	REACTOME_Pathways_09.11.2016	0.27	1	0.068	1	[-1]	Group303	60	18	[CHPF, CHST11, CHST12, CHST13, CHST15, CHST3, CHSY1, CHSY3, CSGALNACT1, CSGALNACT2, CSPG4, CSPG5, DCN, DSE, DSEL, HEXA, IDS, VCAN]
GO:0000585	CS/DS degradation	REACTOME_Pathways_09.11.2016	0.27	1	0.068	1	[-1]	Group303	60	18	[CHPF, CHST11, CHST12, CHST13, CHST15, CHST3, CHSY1, CHSY3, CSGALNACT1, CSGALNACT2, CSPG4, CSPG5, DCN, DSE, DSEL, HEXA, IDS, VCAN]
GO:0000671	Hyaluronan metabolism	REACTOME_Pathways_09.11.2016	0.068	1	0.068	1	[-1]	Group303	57.377	70	[ABCC5, AGRN, B3GNT2, B3GNT7, B4GALT2, B4GALT3, B4GALT6, B4GALT7, CD44, CEMIP, CHP1, CHPF, CHST1, CHST11, CHST12, CHST13, CHST15, CHST2, CHST3, CHST6, CHSY1, CHSY3, CSGALNACT1, CSGALNACT2, CSPG4, CSPG5, DCN, DSE, DSEL, EXT1, EXT2, FMOD, GLB1, GLB1L, GNS, GPC1, GPC3, GPC5, GUSB, HAS1, HAS2, HEXA, HGSNAT, HMMR, HPSE2, HS2ST1, HS3ST3B1, HS6ST1, HS6ST3, HSPG2, IDS, LUM, NDST1, OGN, OMD, PAPSS1, PAPSS…
[truncated: 1,081 more rows]

## Sheet: GSE74089
ID	adj.P.Val	P.Value	t	B	logFC	SPOT_ID	GB_ACC	SEQUENCE	GenBank Nucleotide Accession	Gene Symbol
A_33_P3424577	0.0784	0.0335	-2.5315	-4.64302	-0.474765	A_33_P3424577	A23747	TTTACCTCGGTGTCCTACCAGCAAGGGGTCCTGTCTGCCACCATCCTCTATGAGATCCTG	A23747	-
[truncated: 34,182 more rows]
[truncated: 1 more columns]
