# Supplementary material for: Systems analysis of avascular necrosis of femoral head using integrative data analysis and literature mining delineates pathways associated with disease
Source: Springer Nature journal article supplement (doi:10.1038/s41598-020-75197-0), 2020-10-22
Supplement: MOESM3 [file 41598_2020_75197_MOESM3_ESM%20%281%29.xls]

## Sheet: Title
			Supplementary Data S3 - AVN Proteomics analyses
													Sheet Title	Description
													KEGG Proteomics	Pathway annotation analysis using KEGG Pathways
													Upregulated	List of Upregulated proteins used in the analyses (from published data of Zhang et al., 2009)26
													Downregulated	List of Downregulated proteins used in the analyses (from published data of Zhang et al., 2009)26
													Reactome Proteomics	Pathway annotation analysis using Reactome Pathways
													WikiPathways	Pathway annotation analysis using WikiPathways

## Sheet: KEGG Proteomics
GOID	GOTerm	Ontology Source	Term PValue	Term PValue Corrected with Bonferroni step down	Group PValue	Group PValue Corrected with Bonferroni step down	GOLevels	GOGroups	% Associated Genes	Nr. Genes	Associated Genes Found
GO:0000010	Glycolysis / Gluconeogenesis	KEGG_17.03.2017	0.0077	0.015	0.0077	0.015	[-1]	Group0	4.47761	3	[GAPDH, HK1, TPI1]
GO:0000562	Inositol phosphate metabolism	KEGG_17.03.2017	0.009	0.009	0.009	0.009	[-1]	Group1	4.22535	3	[INPP5B, MTMR1, TPI1]
GO:0004610	Complement and coagulation cascades	KEGG_17.03.2017	0.0012	0.0051	0.0012	0.0038	[-1]	Group2	5.06329	4	[A2M, C4A, FGG, SERPINA1]
GO:0005143	African trypanosomiasis	KEGG_17.03.2017	0.0012	0.006	0.00078	0.0031	[-1]	Group3	8.57143	3	[APOA1, HBA1, HBA2]
GO:0005144	Malaria	KEGG_17.03.2017	0.0032	0.0096	0.00078	0.0031	[-1]	Group3	6.12245	3	[HBA1, HBA2, THBS1]

## Sheet: Upregulated
id	Gene Symbol
IPI00032258	C4A
IPI00021363	JARID1A
IPI00010872	CBX4
IPI00020502	KCNQ1
IPI00218911	MSMB
IPI00446543	-
IPI00022463	TF
IPI00307223	IL1B
IPI00297224	SUSD5
IPI00166504	LOC92017
IPI00339310	MCF2
IPI00339394	RIMS1
IPI00107433	BNIPL
IPI00788047	RABEP2
IPI00554648	KRT8
IPI00303343	SCAF1
IPI00021439	ACTB
IPI00796960	GRM5
IPI00217225	NOS1
IPI00759542	TTN
IPI00006114	SERPINF1
IPI00176345	UNC5A
IPI00001520	SSX2B;SSX2
IPI00014592	CHAD
IPI00183169	MACF1
IPI00219018	GAPDH
IPI00217611	C14orf25
IPI00081836	HIST1H2AH
IPI00412224	BRWD2
IPI00179357	TTN
IPI00413794	DOPEY1
IPI00396485	EEF1A1
IPI00399007	IGHG2
IPI00024053	IGSF9
IPI00418169	ANXA2
IPI00021841	APOA1
IPI00165045	CACNA1E
IPI00011654	TUBB
IPI00738917	LOC642197
IPI00174997	TMEM82
IPI00012104	-
IPI00030273	MST1R
IPI00419585	PPIA;LOC654188;PPIAL3
IPI00856078	LDB1
IPI00005564	STC1
IPI00303476	ATP5B
IPI00018534	HIST1H2BL
IPI00479145	KRT19
IPI00292300	CNTNAP5
IPI00410714	HBA2;HBA1
IPI00783196	MRGPRE
IPI00478376	INPP5B
IPI00607651	FAM40B
IPI00744115	PCCA
IPI00384938	IGHG1
IPI00018246	HK1
IPI00007777	ZNF236
IPI00440493	ATP5A1
IPI00219352	CBS
IPI00296099	THBS1
IPI00152380	MYO15A
IPI00335711	DNAH11
IPI00167995	-
IPI00007109	ZNF409
IPI00444144	KIAA0329
IPI00007818	CPSF3
IPI00030542	LOC441294
IPI00031616	C17orf37
IPI00552725	ARID1B
IPI00414873	ZNF14
IPI00219219	LGALS1
IPI00418560	ZNF793
IPI00020987	PRELP
IPI00430842	IGHA1
IPI00004942	ZNF330
IPI00002353	RGAG1
IPI00294575	CDC27
IPI00374186	RBM43
IPI00073196	LTBP3
IPI00031422	SCN5A
IPI00073066	OR1F2
IPI00829640	IGL@
IPI00454973	CTGLF1
IPI00736860	-
IPI00024714	RGS12
IPI00376439	VPS13B
IPI00001999	OIP5
IPI00166759	DIP2A
IPI00306400	KIFC1
IPI00027812	C12orf32
IPI00021891	FGG
IPI00646304	PPIB
IPI00453473	Histone
IPI00384998	NFASC
IPI00845260	RP11-297H3.4
IPI00451401	TPI1
IPI00014829	DCHS2
IPI00853191	ZNF594
IPI00217051	NAV3
IPI00008800	MAZ
IPI00553177	SERPINA1
IPI00397733	-
IPI00787623	LOC388177
IPI00056478	IGSF8
IPI00395759	-
IPI00328172	TTC26
IPI00065280	LINC00479
IPI00464968	MT-CO1
IPI00015793	SMG6
IPI00329582	MFSD4A
IPI00002647	-
IPI00029620	OR1I1
IPI00398957	ANKRD52
IPI00005018	UBP1
IPI00450329	ZYG11A
IPI00152295	SPATA18
IPI00102863	-
IPI00760958	PATL1
IPI00607803	C22orf15
IPI00065501	JSRP1
IPI00394820	OLFML1
IPI00383606	-
IPI00216452	DPF1
IPI00329125	TRAPPC6B
IPI00007910	SLC34A2
IPI00034277	ATP13A1
IPI00064935	ALPK3
IPI00328260	NSMAF
IPI00788923	-
IPI00001433	PCDHB15
IPI00001678	OR51B4
IPI00022822	COL18A1
IPI00167713	PIGW
IPI00175625	-
IPI00007401	IPO8
IPI00289561	CRLF1
IPI00185096	FLCN
IPI00747063	CLSTN3
IPI00024925	SMIM24

## Sheet: Downregulated
id	Gene symbol
IPI00739940	FRYL
IPI00787870	FLJ43950
IPI00296318	E2F8
IPI00444180	-
IPI00646424	ALDH16A1
IPI00337495	PLOD2
IPI00098769	CHST2
IPI00065931	AKAP13
IPI00411452	DOCK11
IPI00514238	BCORL1
IPI00167259	FLJ40504
IPI00061977	IGHA1
IPI00455733	NHSL1
IPI00220391	RYR1
IPI00300860	PDZD4
IPI00021772	MAT1A
IPI00437998	KRTAP5-10
IPI00455451	NUDT17
IPI00418801	DCDC5
IPI00478003	A2M
IPI00100660	ZNF423
IPI00168597	GPR26
IPI00290916	RP5-821D11.2
IPI00016472	ZC3H13
IPI00306346	PAX8
IPI00220956	MTMR1
IPI00294519	TEP1
IPI00783705	TMEM145
IPI00297646	COL1A1
IPI00163431	TMEM184A
IPI00024934	MUT
IPI00415054	KIAA0329
IPI00022488	HPX
IPI00012486	SPNS1
IPI00305609	TMEM129
IPI00550640	IGHG4
IPI00845354	IGKC
IPI00477850	SYTL3
IPI00045512	HMCN1
IPI00218001	GPR111
IPI00022434	ALB
IPI00328091	NTN4
IPI00004362	MORC1
IPI00419424	IGKV1-5
IPI00784828	-
IPI00384697	ALB
IPI00297301	MIER2
IPI00168728	IGHM
IPI00739423	LOC377711
IPI00745872	ALB
IPI00032971	OSBPL10
IPI00170594	-
IPI00290035	PCDH15
IPI00000839	GRM4
IPI00160130	CUBN

## Sheet: Reactome Proteomics
GOID	GOTerm	Ontology Source	Term PValue	Term PValue Corrected with Bonferroni step down	Group PValue	Group PValue Corrected with Bonferroni step down	GOLevels	GOGroups	% Associated Genes	Nr. Genes	Associated Genes Found
GO:0001571	Glycolysis	REACTOME_Pathways_09.11.2016	0.0007	0.0021	0.0007	0.0014	[-1]	Group0	10	3	[GAPDH, HK1, TPI1]
GO:0000049	Depolarization of the Presynaptic Terminal Triggers the Opening of Calcium Channels	REACTOME_Pathways_09.11.2016	0.0062	0.012	0.0062	0.0062	[-1]	Group1	4.6875	3	[CACNA1E, KCNQ1, SCN5A]
GO:0001244	Phase 0 - rapid depolarisation	REACTOME_Pathways_09.11.2016	0.0062	0.012	0.0062	0.0062	[-1]	Group1	4.6875	3	[CACNA1E, KCNQ1, SCN5A]
GO:0001245	Phase 2 - plateau phase	REACTOME_Pathways_09.11.2016	0.0062	0.012	0.0062	0.0062	[-1]	Group1	4.6875	3	[CACNA1E, KCNQ1, SCN5A]
GO:0001246	Phase 1 - inactivation of fast Na+ channels	REACTOME_Pathways_09.11.2016	0.0062	0.012	0.0062	0.0062	[-1]	Group1	4.6875	3	[CACNA1E, KCNQ1, SCN5A]
GO:0000069	Disinhibition of SNARE formation	REACTOME_Pathways_09.11.2016	1.1e-05	7.1e-05	1.1e-06	3.4e-06	[-1]	Group2	5.26316	7	[A2M, ALB, APOA1, FGG, SERPINA1, THBS1, TTN]
GO:0000071	Platelet degranulation	REACTOME_Pathways_09.11.2016	9.2e-06	6.4e-05	1.1e-06	3.4e-06	[-1]	Group2	5.46875	7	[A2M, ALB, APOA1, FGG, SERPINA1, THBS1, TTN]
GO:0000400	Chylomicron-mediated lipid transport	REACTOME_Pathways_09.11.2016	0.008	0.008	1.1e-06	3.4e-06	[-1]	Group2	4.28571	3	[A2M, ALB, APOA1]
GO:0000401	Lipoprotein metabolism	REACTOME_Pathways_09.11.2016	0.008	0.008	1.1e-06	3.4e-06	[-1]	Group2	4.28571	3	[A2M, ALB, APOA1]
GO:0000520	HDL-mediated lipid transport	REACTOME_Pathways_09.11.2016	1.4e-05	7.3e-05	1.1e-06	3.4e-06	[-1]	Group2	15.3846	4	[A2M, ALB, APOA1, MUT]
GO:0000681	Scavenging of heme from plasma	REACTOME_Pathways_09.11.2016	8.4e-05	0.00033	1.1e-06	3.4e-06	[-1]	Group2	10	4	[ALB, APOA1, HBA1, HBA2]
GO:0000684	Binding and Uptake of Ligands by Scavenger Receptors	REACTOME_Pathways_09.11.2016	8.4e-05	0.00033	1.1e-06	3.4e-06	[-1]	Group2	10	4	[ALB, APOA1, HBA1, HBA2]
GO:0000807	Defects in cobalamin (B12) metabolism	REACTOME_Pathways_09.11.2016	1.4e-05	7.3e-05	1.1e-06	3.4e-06	[-1]	Group2	15.3846	4	[A2M, ALB, APOA1, MUT]
GO:0000821	Defective AMN causes hereditary megaloblastic anemia 1	REACTOME_Pathways_09.11.2016	1.4e-05	7.3e-05	1.1e-06	3.4e-06	[-1]	Group2	15.3846	4	[A2M, ALB, APOA1, MUT]
GO:0000822	Defective CUBN causes hereditary megaloblastic anemia 1	REACTOME_Pathways_09.11.2016	1.4e-05	7.3e-05	1.1e-06	3.4e-06	[-1]	Group2	15.3846	4	[A2M, ALB, APOA1, MUT]
GO:0000903	ATF6 (ATF6-alpha) activates chaperones	REACTOME_Pathways_09.11.2016	0.008	0.008	1.1e-06	3.4e-06	[-1]	Group2	4.28571	3	[A2M, ALB, APOA1]
GO:0001682	Response to elevated platelet cytosolic Ca2+	REACTOME_Pathways_09.11.2016	1.1e-05	7.1e-05	1.1e-06	3.4e-06	[-1]	Group2	5.26316	7	[A2M, ALB, APOA1, FGG, SERPINA1, THBS1, TTN]

## Sheet: WikiPathways
GOID	GOTerm	Ontology Source	Term PValue	Term PValue Corrected with Bonferroni step down	Group PValue	Group PValue Corrected with Bonferroni step down	GOLevels	GOGroups	% Associated Genes	Nr. Genes	Associated Genes Found
GO:0001946	Cori Cycle	WikiPathways_08.11.2016	7.8e-05	0.00015	7.8e-05	7.8e-05	[-1]	Group0	18.75	3	[GAPDH, HK1, TPI1]
GO:0000015	Selenium Micronutrient Network	WikiPathways_08.11.2016	0.0012	0.0012	3.6e-05	7.3e-05	[-1]	Group1	4.49438	4	[ALB, APOA1, CBS, HBA1]
GO:0001533	Vitamin B12 Metabolism	WikiPathways_08.11.2016	2.9e-07	1.1e-06	3.6e-05	7.3e-05	[-1]	Group1	11.3208	6	[ALB, APOA1, CBS, HBA1, MAT1A, MUT]
GO:0000176	Folate Metabolism	WikiPathways_08.11.2016	3e-05	9e-05	3.6e-05	7.3e-05	[-1]	Group1	7.24638	5	[ALB, APOA1, CBS, HBA1, MAT1A]
