# Supplementary material for: Systems analysis of avascular necrosis of femoral head using integrative data analysis and literature mining delineates pathways associated with disease
Source: Springer Nature journal article supplement (doi:10.1038/s41598-020-75197-0), 2020-10-22
Supplement: MOESM4 [file 41598_2020_75197_MOESM4_ESM.xls]

## Sheet: Title
			Supplementary Data S4 - Cofactor network analyses
													Sheet Title	Description
													1. Vit B6, B12, folate - genes	List of Vit B6, B12, folate - genes (from published data of Scott-Boyer et al., 2016)30
													2. WikiPathways	Pathway annotation analysis using WikiPathways
													3. KEGG	Pathway annotation analysis using KEGG Pathways
													4. Reactome	Pathway annotation analysis using Reactome Pathways

## Sheet: Vit B6, B12, folate - genes
Uniprot	HGNC symbol	HGCN Description	Cofactor	Database
Q8N5Z0	AADAT	aminoadipate aminotransferase [Source:HGNC Symbol;Acc:HGNC:17929]	Vit B6 (PP)	Uniprot Cofactor
Q8N5Z0	AADAT	aminoadipate aminotransferase [Source:HGNC Symbol;Acc:HGNC:17929]	Vit B6 (PP)	enzyme
Q8N5Z0	AADAT	aminoadipate aminotransferase [Source:HGNC Symbol;Acc:HGNC:17929]	Vit B6 (PP)	cofactor
Q8N5Z0	AADAT	aminoadipate aminotransferase [Source:HGNC Symbol;Acc:HGNC:17929]	Vit B6 (PP)	cofactor
P21549	AGXT	alanine-glyoxylate aminotransferase [Source:HGNC Symbol;Acc:HGNC:341]	Vit B6 (PP)	Uniprot Cofactor
P21549	AGXT	alanine-glyoxylate aminotransferase [Source:HGNC Symbol;Acc:HGNC:341]	Vit B6 (PP)	enzyme
P21549	AGXT	alanine-glyoxylate aminotransferase [Source:HGNC Symbol;Acc:HGNC:341]	Vit B6 (PP)	enzyme
P21549	AGXT	alanine-glyoxylate aminotransferase [Source:HGNC Symbol;Acc:HGNC:341]	Vit B6 (PP)	enzyme
P21549	AGXT	alanine-glyoxylate aminotransferase [Source:HGNC Symbol;Acc:HGNC:341]	Vit B6 (PP)	cofactor
P21549	AGXT	alanine-glyoxylate aminotransferase [Source:HGNC Symbol;Acc:HGNC:341]	Vit B6 (PP)	cofactor
Q9BYV1	AGXT2	alanine--glyoxylate aminotransferase 2 [Source:HGNC Symbol;Acc:HGNC:14412]	Vit B6 (PP)	Uniprot Cofactor
Q9BYV1	AGXT2	alanine--glyoxylate aminotransferase 2 [Source:HGNC Symbol;Acc:HGNC:14412]	Vit B6 (PP)	cofactor
P13196	ALAS1	5'-aminolevulinate synthase 1 [Source:HGNC Symbol;Acc:HGNC:396]	Vit B6 (PP)	Uniprot Cofactor
P13196	ALAS1	5'-aminolevulinate synthase 1 [Source:HGNC Symbol;Acc:HGNC:396]	Vit B6 (PP)	enzyme
P13196	ALAS1	5'-aminolevulinate synthase 1 [Source:HGNC Symbol;Acc:HGNC:396]	Vit B6 (PP)	cofactor
P22557	ALAS2	5'-aminolevulinate synthase 2 [Source:HGNC Symbol;Acc:HGNC:397]	Vit B6 (PP)	Uniprot Cofactor
P22557	ALAS2	5'-aminolevulinate synthase 2 [Source:HGNC Symbol;Acc:HGNC:397]	Vit B6 (PP)	cofactor
Q96A70	AZIN2	antizyme inhibitor 2 [Source:HGNC Symbol;Acc:HGNC:29957]	Vit B6 (PP)	enzyme
Q96A70	AZIN2	antizyme inhibitor 2 [Source:HGNC Symbol;Acc:HGNC:29957]	Vit B6 (PP)	cofactor
P54687	BCAT1	branched chain amino-acid transaminase 1, cytosolic [Source:HGNC Symbol;Acc:HGNC:976]	Vit B6 (PP)	Uniprot Cofactor
P54687	BCAT1	branched chain amino-acid transaminase 1, cytosolic [Source:HGNC Symbol;Acc:HGNC:976]	Vit B6 (PP)	enzyme
P54687	BCAT1	branched chain amino-acid transaminase 1, cytosolic [Source:HGNC Symbol;Acc:HGNC:976]	Vit B6 (PP)	cofactor
O15382	BCAT2	branched chain amino-acid transaminase 2, mitochondrial [Source:HGNC Symbol;Acc:HGNC:977]	Vit B6 (PP)	Uniprot Cofactor
O15382	BCAT2	branched chain amino-acid transaminase 2, mitochondrial [Source:HGNC Symbol;Acc:HGNC:977]	Vit B6 (PP)	cofactor
P35520	CBS	cystathionine-beta-synthase [Source:HGNC Symbol;Acc:HGNC:1550]	Vit B6 (PP)	Uniprot Cofactor
P35520	CBS	cystathionine-beta-synthase [Source:HGNC Symbol;Acc:HGNC:1550]	Vit B6 (PP)	enzyme
P35520	CBS	cystathionine-beta-synthase [Source:HGNC Symbol;Acc:HGNC:1550]	Vit B6 (PP)	cofactor
Q16773	CCBL1	cysteine conjugate-beta lyase, cytoplasmic [Source:HGNC Symbol;Acc:HGNC:1564]	Vit B6 (PP)	Uniprot Cofactor
Q16773	CCBL1	cysteine conjugate-beta lyase, cytoplasmic [Source:HGNC Symbol;Acc:HGNC:1564]	Vit B6 (PP)	enzyme
Q16773	CCBL1	cysteine conjugate-beta lyase, cytoplasmic [Source:HGNC Symbol;Acc:HGNC:1564]	Vit B6 (PP)	enzyme
Q16773	CCBL1	cysteine conjugate-beta lyase, cytoplasmic [Source:HGNC Symbol;Acc:HGNC:1564]	Vit B6 (PP)	enzyme
Q16773	CCBL1	cysteine conjugate-beta lyase, cytoplasmic [Source:HGNC Symbol;Acc:HGNC:1564]	Vit B6 (PP)	cofactor
Q16773	CCBL1	cysteine conjugate-beta lyase, cytoplasmic [Source:HGNC Symbol;Acc:HGNC:1564]	Vit B6 (PP)	cofactor
Q16773	CCBL1	cysteine conjugate-beta lyase, cytoplasmic [Source:HGNC Symbol;Acc:HGNC:1564]	Vit B6 (PP)	cofactor
Q6YP21	CCBL2	cysteine conjugate-beta lyase 2 [Source:HGNC Symbol;Acc:HGNC:33238]	Vit B6 (PP)	Uniprot Cofactor
Q6YP21	CCBL2	cysteine conjugate-beta lyase 2 [Source:HGNC Symbol;Acc:HGNC:33238]	Vit B6 (PP)	cofactor
Q6YP21	CCBL2	cysteine conjugate-beta lyase 2 [Source:HGNC Symbol;Acc:HGNC:33238]	Vit B6 (PP)	cofactor
Q9Y600	CSAD	cysteine sulfinic acid decarboxylase [Source:HGNC Symbol;Acc:HGNC:18966]	Vit B6 (PP)	Uniprot Cofactor
Q9Y600	CSAD	cysteine sulfinic acid decarboxylase [Source:HGNC Symbol;Acc:HGNC:18966]	Vit B6 (PP)	enzyme
Q9Y600	CSAD	cysteine sulfinic acid decarboxylase [Source:HGNC Symbol;Acc:HGNC:18966]	Vit B6 (PP)	cofactor
P32929	CTH	cystathionine gamma-lyase [Source:HGNC Symbol;Acc:HGNC:2501]	Vit B6 (PP)	Uniprot Cofactor
P32929	CTH	cystathionine gamma-lyase [Source:HGNC Symbol;Acc:HGNC:2501]	Vit B6 (PP)	enzyme
P32929	CTH	cystathionine gamma-lyase [Source:HGNC Symbol;Acc:HGNC:2501]	Vit B6 (PP)	cofactor
P20711	DDC	dopa decarboxylase (aromatic L-amino acid decarboxylase) [Source:HGNC Symbol;Acc:HGNC:2719]	Vit B6 (PP)	Uniprot Cofactor
P20711	DDC	dopa decarboxylase (aromatic L-amino acid decarboxylase) [Source:HGNC Symbol;Acc:HGNC:2719]	Vit B6 (PP)	enzyme
P20711	DDC	dopa decarboxylase (aromatic L-amino acid decarboxylase) [Source:HGNC Symbol;Acc:HGNC:2719]	Vit B6 (PP)	cofactor
Q8TBG4	ETNPPL	ethanolamine-phosphate phospho-lyase [Source:HGNC Symbol;Acc:HGNC:14404]	Vit B6 (PP)	Uniprot Cofactor
Q8TBG4	ETNPPL	ethanolamine-phosphate phospho-lyase [Source:HGNC Symbol;Acc:HGNC:14404]	Vit B6 (PP)	cofactor
O95954	FTCD	formimidoyltransferase cyclodeaminase [Source:HGNC Symbol;Acc:HGNC:3974]	Vit B6 (PP)	Uniprot Cofactor
O95954	FTCD	formimidoyltransferase cyclodeaminase [Source:HGNC Symbol;Acc:HGNC:3974]	Vit B6 (PP)	enzyme
O95954	FTCD	formimidoyltransferase cyclodeaminase [Source:HGNC Symbol;Acc:HGNC:3974]	Vit B6 (PP)	cofactor
Q99259	GAD1	glutamate decarboxylase 1 (brain, 67kDa) [Source:HGNC Symbol;Acc:HGNC:4092]	Vit B6 (PP)	Uniprot Cofactor
Q99259	GAD1	glutamate decarboxylase 1 (brain, 67kDa) [Source:HGNC Symbol;Acc:HGNC:4092]	Vit B6 (PP)	enzyme
Q99259	GAD1	glutamate decarboxylase 1 (brain, 67kDa) [Source:HGNC Symbol;Acc:HGNC:4092]	Vit B6 (PP)	cofactor
Q05329	GAD2	glutamate decarboxylase 2 (pancreatic islets and brain, 65kDa) [Source:HGNC Symbol;Acc:HGNC:4093]	Vit B6 (PP)	Uniprot Cofactor
Q05329	GAD2	glutamate decarboxylase 2 (pancreatic islets and brain, 65kDa) [Source:HGNC Symbol;Acc:HGNC:4093]	Vit B6 (PP)	cofactor
Q6ZQY3	GADL1	glutamate decarboxylase-like 1 [Source:HGNC Symbol;Acc:HGNC:27949]	Vit B6 (PP)	Uniprot Cofactor
O75600	GCAT	glycine C-acetyltransferase [Source:HGNC Symbol;Acc:HGNC:4188]	Vit B6 (PP)	Uniprot Cofactor
O75600	GCAT	glycine C-acetyltransferase [Source:HGNC Symbol;Acc:HGNC:4188]	Vit B6 (PP)	enzyme
O75600	GCAT	glycine C-acetyltransferase [Source:HGNC Symbol;Acc:HGNC:4188]	Vit B6 (PP)	cofactor
P17174	GOT1	glutamic-oxaloacetic transaminase 1, soluble [Source:HGNC Symbol;Acc:HGNC:4432]	Vit B6 (PP)	Uniprot Cofactor
P17174	GOT1	glutamic-oxaloacetic transaminase 1, soluble [Source:HGNC Symbol;Acc:HGNC:4432]	Vit B6 (PP)	enzyme
P17174	GOT1	glutamic-oxaloacetic transaminase 1, soluble [Source:HGNC Symbol;Acc:HGNC:4432]	Vit B6 (PP)	cofactor
P17174	GOT1	glutamic-oxaloacetic transaminase 1, soluble [Source:HGNC Symbol;Acc:HGNC:4432]	Vit B6 (PP)	cofactor
Q8NHS2	GOT1L1	glutamic-oxaloacetic transaminase 1-like 1 [Source:HGNC Symbol;Acc:HGNC:28487]	Vit B6 (PP)	Uniprot Cofactor
P00505	GOT2	glutamic-oxaloacetic transaminase 2, mitochondrial [Source:HGNC Symbol;Acc:HGNC:4433]	Vit B6 (PP)	Uniprot Cofactor
P00505	GOT2	glutamic-oxaloacetic transaminase 2, mitochondrial [Source:HGNC Symbol;Acc:HGNC:4433]	Vit B6 (PP)	cofactor
P00505	GOT2	glutamic-oxaloacetic transaminase 2, mitochondrial [Source:HGNC Symbol;Acc:HGNC:4433]	Vit B6 (PP)	cofactor
P24298	GPT	glutamic-pyruvate transaminase (alanine aminotransferase) [Source:HGNC Symbol;Acc:HGNC:4552]	Vit B6 (PP)	Uniprot Cofactor
P24298	GPT	glutamic-pyruvate transaminase (alanine aminotransferase) [Source:HGNC Symbol;Acc:HGNC:4552]	Vit B6 (PP)	enzyme
P24298	GPT	glutamic-pyruvate transaminase (alanine aminotransferase) [Source:HGNC Symbol;Acc:HGNC:4552]	Vit B6 (PP)	cofactor
Q8TD30	GPT2	glutamic pyruvate transaminase (alanine aminotransferase) 2 [Source:HGNC Symbol;Acc:HGNC:18062]	Vit B6 (PP)	Uniprot Cofactor
Q8TD30	GPT2	glutamic pyruvate transaminase (alanine aminotransferase) 2 [Source:HGNC Symbol;Acc:HGNC:18062]	Vit B6 (PP)	cofactor
P19113	HDC	histidine decarboxylase [Source:HGNC Symbol;Acc:HGNC:4855]	Vit B6 (PP)	Uniprot Cofactor
P19113	HDC	histidine decarboxylase [Source:HGNC Symbol;Acc:HGNC:4855]	Vit B6 (PP)	enzyme
P19113	HDC	histidine decarboxylase [Source:HGNC Symbol;Acc:HGNC:4855]	Vit B6 (PP)	cofactor
Q16719	KYNU	kynureninase [Source:HGNC Symbol;Acc:HGNC:6469]	Vit B6 (PP)	Uniprot Cofactor
Q16719	KYNU	kynureninase [Source:HGNC Symbol;Acc:HGNC:6469]	Vit B6 (PP)	enzyme
Q16719	KYNU	kynureninase [Source:HGNC Symbol;Acc:HGNC:6469]	Vit B6 (PP)	cofactor
Q96EN8	MOCOS	molybdenum cofactor sulfurase [Source:HGNC Symbol;Acc:HGNC:18234]	Vit B6 (PP)	Uniprot Cofactor
P04181	OAT	ornithine aminotransferase [Source:HGNC Symbol;Acc:HGNC:8091]	Vit B6 (PP)	Uniprot Cofactor
P04181	OAT	ornithine aminotransferase [Source:HGNC Symbol;Acc:HGNC:8091]	Vit B6 (PP)	enzyme
P04181	OAT	ornithine aminotransferase [Source:HGNC Symbol;Acc:HGNC:8091]	Vit B6 (PP)	cofactor
P11926	ODC1	ornithine decarboxylase 1 [Source:HGNC Symbol;Acc:HGNC:8109]	Vit B6 (PP)	Uniprot Cofactor
P11926	ODC1	ornithine decarboxylase 1 [Source:HGNC Symbol;Acc:HGNC:8109]	Vit B6 (PP)	enzyme
P11926	ODC1	ornithine decarboxylase 1 [Source:HGNC Symbol;Acc:HGNC:8109]	Vit B6 (PP)	cofactor
Q6P996	PDXDC1	pyridoxal-dependent decarboxylase domain containing 1 [Source:HGNC Symbol;Acc:HGNC:28995]	Vit B6 (PP)	Uniprot Cofactor
Q6P474	PDXDC2P	NA	Vit B6 (PP)	Uniprot Cofactor
Q8IUZ5	PHYKPL	5-phosphohydroxy-L-lysine phospho-lyase [Source:HGNC Symbol;Acc:HGNC:28249]	Vit B6 (PP)	Uniprot Cofactor
Q9UG56	PISD	phosphatidylserine decarboxylase [Source:HGNC Symbol;Acc:HGNC:8999]	Vit B6 (PP)	enzyme
Q9UG56	PISD	phosphatidylserine decarboxylase [Source:HGNC Symbol;Acc:HGNC:8999]	Vit B6 (PP)	cofactor
O94903	PROSC	proline synthetase co-transcribed homolog (bacterial) [Source:HGNC Symbol;Acc:HGNC:9457]	Vit B6 (PP)	Uniprot Cofactor
Q9Y617	PSAT1	phosphoserine aminotransferase 1 [Source:HGNC Symbol;Acc:HGNC:19129]	Vit B6 (PP)	Uniprot Cofactor
Q9Y617	PSAT1	phosphoserine aminotransferase 1 [Source:HGNC Symbol;Acc:HGNC:19129]	Vit B6 (PP)	enzyme
Q9Y617	PSAT1	phosphoserine aminotransferase 1 [Source:HGNC Symbol;Acc:HGNC:19129]	Vit B6 (PP)	cofactor
P11216	PYGB	phosphorylase, glycogen; brain [Source:HGNC Symbol;Acc:HGNC:9723]	Vit B6 (PP)	Uniprot Cofactor
P06737	PYGL	phosphorylase, glycogen, liver [Source:HGNC Symbol;Acc:HGNC:9725]	Vit B6 (PP)	Uniprot Cofactor
P11217	PYGM	phosphorylase, glycogen, muscle [Source:HGNC Symbol;Acc:HGNC:9726]	Vit B6 (PP)	Uniprot Cofactor
Q96I15	SCLY	selenocysteine lyase [Source:HGNC Symbol;Acc:HGNC:18161]	Vit B6 (PP)	Uniprot Cofactor
Q96I15	SCLY	selenocysteine lyase [Source:HGNC Symbol;Acc:HGNC:18161]	Vit B6 (PP)	enzyme
Q96I15	SCLY	selenocysteine lyase [Source:HGNC Symbol;Acc:HGNC:18161]	Vit B6 (PP)	cofactor
P20132	SDS	serine dehydratase [Source:HGNC Symbol;Acc:HGNC:10691]	Vit B6 (PP)	Uniprot Cofactor
P20132	SDS	serine dehydratase [Source:HGNC Symbol;Acc:HGNC:10691]	Vit B6 (PP)	enzyme
P20132	SDS	serine dehydratase [Source:HGNC Symbol;Acc:HGNC:10691]	Vit B6 (PP)	cofactor
P20132	SDS	serine dehydratase [Source:HGNC Symbol;Acc:HGNC:10691]	Vit B6 (PP)	cofactor
Q96GA7	SDSL	serine dehydratase-like [Source:HGNC Symbol;Acc:HGNC:30404]	Vit B6 (PP)	Uniprot Cofactor
Q96GA7	SDSL	serine dehydratase-like [Source:HGNC Symbol;Acc:HGNC:30404]	Vit B6 (PP)	cofactor
Q96GA7	SDSL	serine dehydratase-like [Source:HGNC Symbol;Acc:HGNC:30404]	Vit B6 (PP)	cofactor
Q9HD40	SEPSECS	Sep (O-phosphoserine) tRNA:Sec (selenocysteine) tRNA synthase [Source:HGNC Symbol;Acc:HGNC:30605]	Vit B6 (PP)	Uniprot Cofactor
Q9HD40	SEPSECS	Sep (O-phosphoserine) tRNA:Sec (selenocysteine) tRNA synthase [Source:HGNC Symbol;Acc:HGNC:30605]	Vit B6 (PP)	enzyme
Q9HD40	SEPSECS	Sep (O-phosphoserine) tRNA:Sec (selenocysteine) tRNA synthase [Source:HGNC Symbol;Acc:HGNC:30605]	Vit B6 (PP)	cofactor
O95470	SGPL1	sphingosine-1-phosphate lyase 1 [Source:HGNC Symbol;Acc:HGNC:10817]	Vit B6 (PP)	Uniprot Cofactor
O95470	SGPL1	sphingosine-1-phosphate lyase 1 [Source:HGNC Symbol;Acc:HGNC:10817]	Vit B6 (PP)	enzyme
O95470	SGPL1	sphingosine-1-phosphate lyase 1 [Source:HGNC Symbol;Acc:HGNC:10817]	Vit B6 (PP)	cofactor
P34896	SHMT1	serine hydroxymethyltransferase 1 (soluble) [Source:HGNC Symbol;Acc:HGNC:10850]	Vit B6 (PP)	Uniprot Cofactor
P34896	SHMT1	serine hydroxymethyltransferase 1 (soluble) [Source:HGNC Symbol;Acc:HGNC:10850]	Vit B6 (PP)	enzyme
P34896	SHMT1	serine hydroxymethyltransferase 1 (soluble) [Source:HGNC Symbol;Acc:HGNC:10850]	Vit B6 (PP)	cofactor
P34897	SHMT2	serine hydroxymethyltransferase 2 (mitochondrial) [Source:HGNC Symbol;Acc:HGNC:10852]	Vit B6 (PP)	Uniprot Cofactor
P34897	SHMT2	serine hydroxymethyltransferase 2 (mitochondrial) [Source:HGNC Symbol;Acc:HGNC:10852]	Vit B6 (PP)	cofactor
O15269	SPTLC1	serine palmitoyltransferase, long chain base subunit 1 [Source:HGNC Symbol;Acc:HGNC:11277]	Vit B6 (PP)	Uniprot Cofactor
O15270	SPTLC2	serine palmitoyltransferase, long chain base subunit 2 [Source:HGNC Symbol;Acc:HGNC:11278]	Vit B6 (PP)	Uniprot Cofactor
O15270	SPTLC2	serine palmitoyltransferase, long chain base subunit 2 [Source:HGNC Symbol;Acc:HGNC:11278]	Vit B6 (PP)	enzyme
Q9NUV7	SPTLC3	serine palmitoyltransferase, long chain base subunit 3 [Source:HGNC Symbol;Acc:HGNC:16253]	Vit B6 (PP)	Uniprot Cofactor
Q9GZT4	SRR	serine racemase [Source:HGNC Symbol;Acc:HGNC:14398]	Vit B6 (PP)	Uniprot Cofactor
Q9GZT4	SRR	serine racemase [Source:HGNC Symbol;Acc:HGNC:14398]	Vit B6 (PP)	enzyme
Q9GZT4	SRR	serine racemase [Source:HGNC Symbol;Acc:HGNC:14398]	Vit B6 (PP)	cofactor
Q9GZT4	SRR	serine racemase [Source:HGNC Symbol;Acc:HGNC:14398]	Vit B6 (PP)	cofactor
Q9GZT4	SRR	serine racemase [Source:HGNC Symbol;Acc:HGNC:14398]	Vit B6 (PP)	cofactor
P17735	TAT	tyrosine aminotransferase [Source:HGNC Symbol;Acc:HGNC:11573]	Vit B6 (PP)	Uniprot Cofactor
P17735	TAT	tyrosine aminotransferase [Source:HGNC Symbol;Acc:HGNC:11573]	Vit B6 (PP)	enzyme
P17735	TAT	tyrosine aminotransferase [Source:HGNC Symbol;Acc:HGNC:11573]	Vit B6 (PP)	cofactor
Q8IYQ7	THNSL1	threonine synthase-like 1 (S. cerevisiae) [Source:HGNC Symbol;Acc:HGNC:26160]	Vit B6 (PP)	Uniprot Cofactor
Q86YJ6	THNSL2	threonine synthase-like 2 (S. cerevisiae) [Source:HGNC Symbol;Acc:HGNC:25602]	Vit B6 (PP)	Uniprot Cofactor
P15104	GLUL	glutamate-ammonia ligase [Source:HGNC Symbol;Acc:HGNC:4341]	Vit B6 (PP)	cofactor
P31939	ATIC	5-aminoimidazole-4-carboxamide ribonucleotide formyltransferase/IMP cyclohydrolase [Source:HGNC Symbol;Acc:HGNC:794]	Vit B9 (THF)	cofactor
Q16526	CRY1	cryptochrome circadian clock 1 [Source:HGNC Symbol;Acc:HGNC:2384]	Vit B9 (THF)	Uniprot Cofactor
Q49AN0	CRY2	cryptochrome circadian clock 2 [Source:HGNC Symbol;Acc:HGNC:2385]	Vit B9 (THF)	Uniprot Cofactor
P22102	GART	phosphoribosylglycinamide formyltransferase, phosphoribosylglycinamide synthetase, phosphoribosylaminoimidazole synthetase [Source:HGNC Symbol;Acc:HGNC:4163]	Vit B9 (THF)	cofactor
P53582	METAP1	methionyl aminopeptidase 1 [Source:HGNC Symbol;Acc:HGNC:15789]	Vit B12 (AB12)	cofactor
Q6UB28	METAP1D	methionyl aminopeptidase type 1D (mitochondrial) [Source:HGNC Symbol;Acc:HGNC:32583]	Vit B12 (AB12)	cofactor
P50579	METAP2	methionyl aminopeptidase 2 [Source:HGNC Symbol;Acc:HGNC:16672]	Vit B12 (AB12)	cofactor
Q99707	MTR	5-methyltetrahydrofolate-homocysteine methyltransferase [Source:HGNC Symbol;Acc:HGNC:7468]	Vit B12 (AB12)	Uniprot Cofactor
Q99707	MTR	5-methyltetrahydrofolate-homocysteine methyltransferase [Source:HGNC Symbol;Acc:HGNC:7468]	Vit B12 (AB12)	cofactor
Q99707	MTR	5-methyltetrahydrofolate-homocysteine methyltransferase [Source:HGNC Symbol;Acc:HGNC:7468]	Vit B12 (MeB12)	enzyme
Q99707	MTR	5-methyltetrahydrofolate-homocysteine methyltransferase [Source:HGNC Symbol;Acc:HGNC:7468]	Vit B9 (THF)	cofactor
P22033	MUT	methylmalonyl CoA mutase [Source:HGNC Symbol;Acc:HGNC:7526]	Vit B12 (AB12)	enzyme
P22033	MUT	methylmalonyl CoA mutase [Source:HGNC Symbol;Acc:HGNC:7526]	Vit B12 (AB12)	cofactor
P80404	ABAT	4-aminobutyrate aminotransferase [Source:HGNC Symbol;Acc:HGNC:23]	Vit B6 (PP)	Uniprot Cofactor
P80404	ABAT	4-aminobutyrate aminotransferase [Source:HGNC Symbol;Acc:HGNC:23]	Vit B6 (PP)	enzyme
P80404	ABAT	4-aminobutyrate aminotransferase [Source:HGNC Symbol;Acc:HGNC:23]	Vit B6 (PP)	cofactor
Q9Y697	NFS1	NFS1 cysteine desulfurase [Source:HGNC Symbol;Acc:HGNC:15910]	Vit B6 (PP)	Uniprot Cofactor
Q9Y697	NFS1	NFS1 cysteine desulfurase [Source:HGNC Symbol;Acc:HGNC:15910]	Vit B6 (PP)	enzyme
Q9Y697	NFS1	NFS1 cysteine desulfurase [Source:HGNC Symbol;Acc:HGNC:15910]	Vit B6 (PP)	cofactor
P23378	GLDC	glycine dehydrogenase (decarboxylating) [Source:HGNC Symbol;Acc:HGNC:4313]	Vit B6 (PP)	Uniprot Cofactor
P23378	GLDC	glycine dehydrogenase (decarboxylating) [Source:HGNC Symbol;Acc:HGNC:4313]	Vit B6 (PP)	enzyme
P23378	GLDC	glycine dehydrogenase (decarboxylating) [Source:HGNC Symbol;Acc:HGNC:4313]	Vit B6 (PP)	cofactor

## Sheet: WikiPathways
GOID	GOTerm	Ontology Source	Term PValue	Group PValue	GOLevels	GOGroups	% Associated Genes	Nr. Genes	Associated Genes Found
GO:0000106	Alanine and aspartate metabolism	WikiPathways_08.11.2016	3.4e-13	3.4e-13	[-1]	Group0	58.3333	7	[ABAT, AGXT, GAD1, GAD2, GOT1, GOT2, GPT]
GO:0001422	Sphingolipid Metabolism	WikiPathways_08.11.2016	0.00032	0.00032	[-1]	Group1	15	3	[SPTLC1, SPTLC2, SPTLC3]
GO:0000500	Glycogen Metabolism	WikiPathways_08.11.2016	0.0019	0.0019	[-1]	Group2	8.33333	3	[PYGB, PYGL, PYGM]
GO:0000550	Biogenic Amine Synthesis	WikiPathways_08.11.2016	3.4e-06	3.4e-06	[-1]	Group3	25	4	[DDC, GAD1, GAD2, HDC]
GO:0000028	Selenium Metabolism and Selenoproteins	WikiPathways_08.11.2016	0.0038	0.0038	[-1]	Group4	6.52174	3	[CTH, SCLY, SEPSECS]
GO:0000465	Tryptophan metabolism	WikiPathways_08.11.2016	0.0038	0.0038	[-1]	Group5	6.52174	3	[AADAT, DDC, KYNU]
GO:0000015	Selenium Micronutrient Network	WikiPathways_08.11.2016	0.0032	8.8e-12	[-1]	Group6	4.49438	4	[CBS, CTH, KYNU, MTR]
GO:0001533	Vitamin B12 Metabolism	WikiPathways_08.11.2016	2.8e-05	8.8e-12	[-1]	Group6	9.43396	5	[CBS, CTH, MTR, MUT, SHMT2]
GO:0000176	Folate Metabolism	WikiPathways_08.11.2016	6.6e-06	8.8e-12	[-1]	Group6	8.69565	6	[CBS, CTH, GART, MTR, SHMT1, SHMT2]
GO:0002333	Trans-sulfuration pathway	WikiPathways_08.11.2016	3e-09	8.8e-12	[-1]	Group6	50	5	[CBS, CSAD, CTH, GOT1, MTR]
GO:0000241	One Carbon Metabolism	WikiPathways_08.11.2016	3.9e-08	8.8e-12	[-1]	Group6	20	6	[ATIC, FTCD, GART, MTR, SHMT1, SHMT2]
GO:0002525	Trans-sulfuration and one carbon metabolism	WikiPathways_08.11.2016	6e-08	8.8e-12	[-1]	Group6	18.75	6	[CBS, CTH, MTR, PSAT1, SHMT1, SHMT2]

## Sheet: KEGG
GOID	GOTerm	Ontology Source	Term PValue	Group PValue	GOLevels	GOGroups	% Associated Genes	Nr. Genes	Associated Genes Found
GO:0000380	Tryptophan metabolism	KEGG_17.03.2017	1.1e-05	1.1e-05	[-1]	Group00	12.5	5	[AADAT, DDC, KYAT1, KYAT3, KYNU]
GO:0000340	Histidine metabolism	KEGG_17.03.2017	0.00075	0.00075	[-1]	Group01	12.5	3	[DDC, FTCD, HDC]
GO:0000450	Selenocompound metabolism	KEGG_17.03.2017	1.7e-09	1.7e-09	[-1]	Group02	35.2941	6	[CTH, KYAT1, KYAT3, MTR, SCLY, SEPSECS]
GO:0000500	Starch and sucrose metabolism	KEGG_17.03.2017	0.0025	0.0025	[-1]	Group03	8.33333	3	[PYGB, PYGL, PYGM]
GO:0000600	Sphingolipid metabolism	KEGG_17.03.2017	0.00042	0.00042	[-1]	Group04	8.51064	4	[SGPL1, SPTLC1, SPTLC2, SPTLC3]
GO:0000630	Glyoxylate and dicarboxylate metabolism	KEGG_17.03.2017	4.9e-08	4.9e-08	[-1]	Group05	21.4286	6	[AGXT, GLDC, GLUL, MUT, SHMT1, SHMT2]
GO:0000670	One carbon pool by folate	KEGG_17.03.2017	5.3e-09	5.3e-09	[-1]	Group06	30	6	[ATIC, FTCD, GART, MTR, SHMT1, SHMT2]
GO:0000260	Glycine, serine and threonine metabolism	KEGG_17.03.2017	6.6e-19	6.6e-19	[-1]	Group07	32.5	13	[AGXT, AGXT2, ALAS1, ALAS2, CBS, CTH, GCAT, GLDC, PSAT1, SDSL, SHMT1, SHMT2, SRR]
GO:0000270	Cysteine and methionine metabolism	KEGG_17.03.2017	7.3e-13	6.1e-13	[-1]	Group08	22.2222	10	[AGXT2, BCAT1, BCAT2, CBS, CTH, GOT1, GOT2, MTR, SDSL, TAT]
GO:0000280	Valine, leucine and isoleucine degradation	KEGG_17.03.2017	2.8e-05	6.1e-13	[-1]	Group08	10.4167	5	[ABAT, AGXT2, BCAT1, BCAT2, MUT]
GO:0000290	Valine, leucine and isoleucine biosynthesis	KEGG_17.03.2017	1.6e-06	6.1e-13	[-1]	Group08	75	3	[BCAT1, BCAT2, SDSL]
GO:0000400	Phenylalanine, tyrosine and tryptophan biosynthesis	KEGG_17.03.2017	4.1e-06	6.1e-13	[-1]	Group08	60	3	[GOT1, GOT2, TAT]
GO:0000770	Pantothenate and CoA biosynthesis	KEGG_17.03.2017	0.00031	6.1e-13	[-1]	Group08	16.6667	3	[BCAT1, BCAT2, GADL1]
GO:0000220	Arginine biosynthesis	KEGG_17.03.2017	3.9e-07	5.7e-17	[-1]	Group09	23.8095	5	[GLUL, GOT1, GOT2, GPT, GPT2]
GO:0000270	Cysteine and methionine metabolism	KEGG_17.03.2017	7.3e-13	5.7e-17	[-1]	Group09	22.2222	10	[AGXT2, BCAT1, BCAT2, CBS, CTH, GOT1, GOT2, MTR, SDSL, TAT]
GO:0000330	Arginine and proline metabolism	KEGG_17.03.2017	3.5e-05	5.7e-17	[-1]	Group09	10	5	[AZIN2, GOT1, GOT2, OAT, ODC1]
GO:0000350	Tyrosine metabolism	KEGG_17.03.2017	0.00013	5.7e-17	[-1]	Group09	11.4286	4	[DDC, GOT1, GOT2, TAT]
GO:0000360	Phenylalanine metabolism	KEGG_17.03.2017	6.7e-06	5.7e-17	[-1]	Group09	23.5294	4	[DDC, GOT1, GOT2, TAT]
GO:0000400	Phenylalanine, tyrosine and tryptophan biosynthesis	KEGG_17.03.2017	4.1e-06	5.7e-17	[-1]	Group09	60	3	[GOT1, GOT2, TAT]
GO:0000220	Arginine biosynthesis	KEGG_17.03.2017	3.9e-07	7.7e-10	[-1]	Group10	23.8095	5	[GLUL, GOT1, GOT2, GPT, GPT2]
GO:0000250	Alanine, aspartate and glutamate metabolism	KEGG_17.03.2017	4.4e-14	7.7e-10	[-1]	Group10	28.5714	10	[ABAT, AGXT, AGXT2, GAD1, GAD2, GLUL, GOT1, GOT2, GPT, GPT2]
GO:0000400	Phenylalanine, tyrosine and tryptophan biosynthesis	KEGG_17.03.2017	4.1e-06	7.7e-10	[-1]	Group10	60	3	[GOT1, GOT2, TAT]
GO:0000410	beta-Alanine metabolism	KEGG_17.03.2017	8.1e-05	7.7e-10	[-1]	Group10	12.9032	4	[ABAT, GAD1, GAD2, GADL1]
GO:0000430	Taurine and hypotaurine metabolism	KEGG_17.03.2017	9.6e-07	7.7e-10	[-1]	Group10	36.3636	4	[CSAD, GAD1, GAD2, GADL1]
GO:0000650	Butanoate metabolism	KEGG_17.03.2017	0.0012	7.7e-10	[-1]	Group10	10.7143	3	[ABAT, GAD1, GAD2]
GO:0004727	GABAergic synapse	KEGG_17.03.2017	0.0043	7.7e-10	[-1]	Group10	4.54545	4	[ABAT, GAD1, GAD2, GLUL]

## Sheet: Reactome
GOID	GOTerm	Ontology Source	Term PValue	Group PValue	GOLevels	GOGroups	% Associated Genes	Nr. Genes	Associated Genes Found
GO:0000932	Glyoxylate metabolism and glycine degradation	REACTOME_Pathways_09.11.2016	0.00032	0.00032	[-1]	Group0	12	3	[AGXT, AGXT2, GLDC]
GO:0001581	Branched-chain amino acid catabolism	REACTOME_Pathways_09.11.2016	0.00025	0.00025	[-1]	Group1	13.0435	3	[BCAT1, BCAT2, SHMT1]
GO:0001586	Tryptophan catabolism	REACTOME_Pathways_09.11.2016	2.5e-07	2.5e-07	[-1]	Group2	36.3636	4	[AADAT, KYAT1, KYAT3, KYNU]
GO:0001778	GABA synthesis, release, reuptake and degradation	REACTOME_Pathways_09.11.2016	0.00012	0.00012	[-1]	Group3	16.6667	3	[ABAT, GAD1, GAD2]
GO:0000302	Sphingolipid de novo biosynthesis	REACTOME_Pathways_09.11.2016	7e-05	7e-05	[-1]	Group4	9.7561	4	[SGPL1, SPTLC1, SPTLC2, SPTLC3]
GO:0001578	Amino acid synthesis and interconversion (transamination)	REACTOME_Pathways_09.11.2016	1.3e-12	1.3e-12	[-1]	Group5	28.5714	8	[GADL1, GLUL, GOT1, GOT2, GPT, KYAT1, OAT, PSAT1]
GO:0001828	Serine biosynthesis	REACTOME_Pathways_09.11.2016	1.3e-12	1.3e-12	[-1]	Group5	28.5714	8	[GADL1, GLUL, GOT1, GOT2, GPT, KYAT1, OAT, PSAT1]
GO:0001457	Histidine, lysine, phenylalanine, tyrosine, proline and tryptophan catabolism	REACTOME_Pathways_09.11.2016	1.3e-31	1.3e-31	[-1]	Group6	8.90805	31	[AADAT, AGXT, AGXT2, AZIN2, BCAT1, BCAT2, CBS, CSAD, CTH, DDC, FTCD, GADL1, GCAT, GLDC, GLUL, GOT1, GOT2, GPT, HDC, KYAT1, KYAT3, KYNU, MTR, OAT, ODC1, PHYKPL, PSAT1, SCLY, SEPSECS, SHMT1, TAT]
GO:0001584	Lysine catabolism	REACTOME_Pathways_09.11.2016	1.3e-31	1.3e-31	[-1]	Group6	8.90805	31	[AADAT, AGXT, AGXT2, AZIN2, BCAT1, BCAT2, CBS, CSAD, CTH, DDC, FTCD, GADL1, GCAT, GLDC, GLUL, GOT1, GOT2, GPT, HDC, KYAT1, KYAT3, KYNU, MTR, OAT, ODC1, PHYKPL, PSAT1, SCLY, SEPSECS, SHMT1, TAT]
GO:0001589	Metabolism of amino acids and derivatives	REACTOME_Pathways_09.11.2016	1.3e-31	1.3e-31	[-1]	Group6	8.90805	31	[AADAT, AGXT, AGXT2, AZIN2, BCAT1, BCAT2, CBS, CSAD, CTH, DDC, FTCD, GADL1, GCAT, GLDC, GLUL, GOT1, GOT2, GPT, HDC, KYAT1, KYAT3, KYNU, MTR, OAT, ODC1, PHYKPL, PSAT1, SCLY, SEPSECS, SHMT1, TAT]
GO:0000238	Sulfide oxidation to sulfate	REACTOME_Pathways_09.11.2016	2.4e-07	1.1e-08	[-1]	Group7	19.2308	5	[CBS, CSAD, CTH, GOT1, MTR]
GO:0000239	Degradation of cysteine and homocysteine	REACTOME_Pathways_09.11.2016	2.4e-07	1.1e-08	[-1]	Group7	19.2308	5	[CBS, CSAD, CTH, GOT1, MTR]
GO:0000241	Sulfur amino acid metabolism	REACTOME_Pathways_09.11.2016	2.4e-07	1.1e-08	[-1]	Group7	19.2308	5	[CBS, CSAD, CTH, GOT1, MTR]
GO:0000705	Metabolism of ingested SeMet, Sec, MeSec into H2Se	REACTOME_Pathways_09.11.2016	1.2e-05	1.1e-08	[-1]	Group7	33.3333	3	[CBS, CTH, SCLY]
GO:0000798	Glycogen storage diseases	REACTOME_Pathways_09.11.2016	0.00046	6.8e-05	[-1]	Group8	10.7143	3	[PYGB, PYGL, PYGM]
GO:0000817	Glycogen synthesis	REACTOME_Pathways_09.11.2016	0.00046	6.8e-05	[-1]	Group8	10.7143	3	[PYGB, PYGL, PYGM]
GO:0000885	Myoclonic epilepsy of Lafora	REACTOME_Pathways_09.11.2016	0.00046	6.8e-05	[-1]	Group8	10.7143	3	[PYGB, PYGL, PYGM]
GO:0000920	Glycogen storage disease type 0 (liver GYS2)	REACTOME_Pathways_09.11.2016	0.00046	6.8e-05	[-1]	Group8	10.7143	3	[PYGB, PYGL, PYGM]
GO:0000921	Glycogen storage disease type IV (GBE1)	REACTOME_Pathways_09.11.2016	0.00046	6.8e-05	[-1]	Group8	10.7143	3	[PYGB, PYGL, PYGM]
GO:0001205	Lysosomal glycogen catabolism	REACTOME_Pathways_09.11.2016	0.00046	6.8e-05	[-1]	Group8	10.7143	3	[PYGB, PYGL, PYGM]
GO:0001206	Glycogen storage disease type II (GAA)	REACTOME_Pathways_09.11.2016	0.00046	6.8e-05	[-1]	Group8	10.7143	3	[PYGB, PYGL, PYGM]
GO:0001365	Diseases of carbohydrate metabolism	REACTOME_Pathways_09.11.2016	0.00046	6.8e-05	[-1]	Group8	10.7143	3	[PYGB, PYGL, PYGM]
GO:0001572	Glycogen breakdown (glycogenolysis)	REACTOME_Pathways_09.11.2016	0.00046	6.8e-05	[-1]	Group8	10.7143	3	[PYGB, PYGL, PYGM]
GO:0001573	Gluconeogenesis	REACTOME_Pathways_09.11.2016	6.8e-05	6.8e-05	[-1]	Group8	6.32911	5	[GOT1, GOT2, PYGB, PYGL, PYGM]
GO:0001575	Glucose metabolism	REACTOME_Pathways_09.11.2016	6.8e-05	6.8e-05	[-1]	Group8	6.32911	5	[GOT1, GOT2, PYGB, PYGL, PYGM]
