# Supplementary material for: Systems analysis of avascular necrosis of femoral head using integrative data analysis and literature mining delineates pathways associated with disease
Source: Springer Nature journal article supplement (doi:10.1038/s41598-020-75197-0), 2020-10-22
Supplement: MOESM6 [file 41598_2020_75197_MOESM6_ESM.xls]

## Sheet: Sheet1
			Supplementary Data S6 - Integrated network analyses
															Sheet Title	Description
															1. Network Centrality Analysis	Network centrality analysis of AVNFH integrated network to determine hub nodes
															2. KEGG	Pathway annotation analysis using KEGG Pathways
															3. Reactome	Pathway annotation analysis using Reactome Pathways
															4. WikiPathways	Pathway annotation analysis using WikiPathways

## Sheet: Network centrality analysis
SUID	Betweenness	Closeness	Degree	name	selected	shared name
61859	9.74357e+07	0.966429	9701	AVN Transcriptomics	0	AVN Transcriptomics
61392	1.92078e+06	0.33733	174	AVN Proteomics	0	AVN Proteomics
82637	749451	0.334066	66	B6, B12, Folate Cofactor network	0	B6, B12, Folate Cofactor network
61746	678959	0.333773	57	AVN SNPs	0	AVN SNPs
61448	56125.1	0.498335	3	MUT	0	MUT
61603	56125.1	0.498335	3	CBS	0	CBS
61748	32773.2	0.493305	2	ACE	0	ACE
61758	32773.2	0.493305	2	ANK2	0	ANK2
61760	32773.2	0.493305	2	ANXA6	0	ANXA6
61769	32773.2	0.493305	2	BMP6	0	BMP6
61773	32773.2	0.493305	2	CABIN1	0	CABIN1
61775	32773.2	0.493305	2	CAT	0	CAT
61789	32773.2	0.493305	2	EDN1	0	EDN1
61791	32773.2	0.493305	2	NOS3	0	NOS3
61793	32773.2	0.493305	2	F5	0	F5
61795	32773.2	0.493305	2	FAT1	0	FAT1
61803	32773.2	0.493305	2	IGFBP3	0	IGFBP3
61809	32773.2	0.493305	2	KL	0	KL
61811	32773.2	0.493305	2	MMP2	0	MMP2
61817	32773.2	0.493305	2	MTHFR	0	MTHFR
61833	32773.2	0.493305	2	SPEG	0	SPEG
61837	32773.2	0.493305	2	STARD13	0	STARD13
61839	32773.2	0.493305	2	STEAP4	0	STEAP4
61842	32773.2	0.493305	2	TGFBR2	0	TGFBR2
61846	32773.2	0.493305	2	TYMS	0	TYMS
61854	32773.2	0.493305	2	VEGFC	0	VEGFC
61856	32773.2	0.493305	2	ZFHX3	0	ZFHX3
62179	27032.1	0.493404	2	PHYKPL	0	PHYKPL
63305	27032.1	0.493404	2	OAT	0	OAT
63589	27032.1	0.493404	2	ABAT	0	ABAT
63680	27032.1	0.493404	2	GART	0	GART
67473	27032.1	0.493404	2	CTH	0	CTH
67615	27032.1	0.493404	2	GLUL	0	GLUL
67631	27032.1	0.493404	2	GOT2	0	GOT2
68014	27032.1	0.493404	2	ODC1	0	ODC1
69145	27032.1	0.493404	2	SGPL1	0	SGPL1
69282	27032.1	0.493404	2	CRY1	0	CRY1
70431	27032.1	0.493404	2	BCAT1	0	BCAT1
71208	27032.1	0.493404	2	SPTLC1	0	SPTLC1
71558	27032.1	0.493404	2	METAP2	0	METAP2
71562	27032.1	0.493404	2	SDS	0	SDS
73220	27032.1	0.493404	2	PDXDC1	0	PDXDC1
73328	27032.1	0.493404	2	METAP1	0	METAP1
74079	27032.1	0.493404	2	AADAT	0	AADAT
74269	27032.1	0.493404	2	SCLY	0	SCLY
75031	27032.1	0.493404	2	THNSL2	0	THNSL2
76108	27032.1	0.493404	2	NFS1	0	NFS1
76122	27032.1	0.493404	2	CRY2	0	CRY2
77084	27032.1	0.493404	2	THNSL1	0	THNSL1
78454	27032.1	0.493404	2	AZIN2	0	AZIN2
79572	27032.1	0.493404	2	GOT1L1	0	GOT1L1
81175	27032.1	0.493404	2	METAP1D	0	METAP1D
81415	27032.1	0.493404	2	FTCD	0	FTCD
61398	24964.6	0.49638	2	PLOD2	0	PLOD2
61400	24964.6	0.49638	2	CHST2	0	CHST2
61402	24964.6	0.49638	2	AKAP13	0	AKAP13
61404	24964.6	0.49638	2	DOCK11	0	DOCK11
61406	24964.6	0.49638	2	BCORL1	0	BCORL1
61416	24964.6	0.49638	2	PDZD4	0	PDZD4
61420	24964.6	0.49638	2	KRTAP5-10	0	KRTAP5-10
61426	24964.6	0.49638	2	A2M	0	A2M
61428	24964.6	0.49638	2	ZNF423	0	ZNF423
61434	24964.6	0.49638	2	ZC3H13	0	ZC3H13
61440	24964.6	0.49638	2	TEP1	0	TEP1
61444	24964.6	0.49638	2	COL1A1	0	COL1A1
61446	24964.6	0.49638	2	TMEM184A	0	TMEM184A
61452	24964.6	0.49638	2	HPX	0	HPX
61464	24964.6	0.49638	2	HMCN1	0	HMCN1
61468	24964.6	0.49638	2	ALB	0	ALB
61470	24964.6	0.49638	2	NTN4	0	NTN4
61477	24964.6	0.49638	2	MIER2	0	MIER2
61484	24964.6	0.49638	2	OSBPL10	0	OSBPL10
61514	24964.6	0.49638	2	BNIPL	0	BNIPL
61516	24964.6	0.49638	2	RABEP2	0	RABEP2
61518	24964.6	0.49638	2	KRT8	0	KRT8
61522	24964.6	0.49638	2	ACTB	0	ACTB
61526	24964.6	0.49638	2	NOS1	0	NOS1
61528	24964.6	0.49638	2	TTN	0	TTN
61530	24964.6	0.49638	2	SERPINF1	0	SERPINF1
61536	24964.6	0.49638	2	CHAD	0	CHAD
61538	24964.6	0.49638	2	MACF1	0	MACF1
61540	24964.6	0.49638	2	GAPDH	0	GAPDH
61551	24964.6	0.49638	2	EEF1A1	0	EEF1A1
61555	24964.6	0.49638	2	IGSF9	0	IGSF9
61559	24964.6	0.49638	2	APOA1	0	APOA1
61563	24964.6	0.49638	2	TUBB	0	TUBB
61567	24964.6	0.49638	2	TMEM82	0	TMEM82
61579	24964.6	0.49638	2	HIST1H2BL	0	HIST1H2BL
61581	24964.6	0.49638	2	KRT19	0	KRT19
61587	24964.6	0.49638	2	MRGPRE	0	MRGPRE
61593	24964.6	0.49638	2	PCCA	0	PCCA
61597	24964.6	0.49638	2	HK1	0	HK1
61599	24964.6	0.49638	2	ZNF236	0	ZNF236
61601	24964.6	0.49638	2	ATP5A1	0	ATP5A1
61605	24964.6	0.49638	2	THBS1	0	THBS1
61607	24964.6	0.49638	2	MYO15A	0	MYO15A
61614	24964.6	0.49638	2	CPSF3	0	CPSF3
61620	24964.6	0.49638	2	ARID1B	0	ARID1B
61624	24964.6	0.49638	2	LGALS1	0	LGALS1
61626	24964.6	0.49638	2	ZNF793	0	ZNF793
61628	24964.6	0.49638	2	PRELP	0	PRELP
61635	24964.6	0.49638	2	CDC27	0	CDC27
61637	24964.6	0.49638	2	RBM43	0	RBM43
61641	24964.6	0.49638	2	SCN5A	0	SCN5A
61651	24964.6	0.49638	2	VPS13B	0	VPS13B
61653	24964.6	0.49638	2	OIP5	0	OIP5
61663	24964.6	0.49638	2	PPIB	0	PPIB
61667	24964.6	0.49638	2	NFASC	0	NFASC
61671	24964.6	0.49638	2	TPI1	0	TPI1
61673	24964.6	0.49638	2	DCHS2	0	DCHS2
61675	24964.6	0.49638	2	ZNF594	0	ZNF594
61677	24964.6	0.49638	2	NAV3	0	NAV3
61685	24964.6	0.49638	2	IGSF8	0	IGSF8
61689	24964.6	0.49638	2	LINC00479	0	LINC00479
61699	24964.6	0.49638	2	ANKRD52	0	ANKRD52
61701	24964.6	0.49638	2	UBP1	0	UBP1
61705	24964.6	0.49638	2	SPATA18	0	SPATA18
61709	24964.6	0.49638	2	C22orf15	0	C22orf15
61715	24964.6	0.49638	2	DPF1	0	DPF1
61723	24964.6	0.49638	2	ALPK3	0	ALPK3
61725	24964.6	0.49638	2	NSMAF	0	NSMAF
61727	24964.6	0.49638	2	PCDHB15	0	PCDHB15
61731	24964.6	0.49638	2	COL18A1	0	COL18A1
61735	24964.6	0.49638	2	IPO8	0	IPO8
61737	24964.6	0.49638	2	CRLF1	0	CRLF1
61739	24964.6	0.49638	2	FLCN	0	FLCN
61741	24964.6	0.49638	2	CLSTN3	0	CLSTN3
61502	3687.76	0.252972	2	TF	0	TF
61557	3687.76	0.252972	2	ANXA2	0	ANXA2
61391	0	0.252248	1	FLJ43950	0	FLJ43950
61394	0	0.252248	1	E2F8	0	E2F8
61396	0	0.252248	1	ALDH16A1	0	ALDH16A1
61408	0	0.252248	1	FLJ40504	0	FLJ40504
61410	0	0.252248	1	IGHA1	0	IGHA1
61412	0	0.252248	1	NHSL1	0	NHSL1
61414	0	0.252248	1	RYR1	0	RYR1
61418	0	0.252248	1	MAT1A	0	MAT1A
61422	0	0.252248	1	NUDT17	0	NUDT17
61424	0	0.252248	1	DCDC5	0	DCDC5
61430	0	0.252248	1	GPR26	0	GPR26
61432	0	0.252248	1	RP5-821D11.2	0	RP5-821D11.2
61436	0	0.252248	1	PAX8	0	PAX8
61438	0	0.252248	1	MTMR1	0	MTMR1
61442	0	0.252248	1	TMEM145	0	TMEM145
61450	0	0.252248	1	KIAA0329	0	KIAA0329
61454	0	0.252248	1	SPNS1	0	SPNS1
61456	0	0.252248	1	TMEM129	0	TMEM129
61458	0	0.252248	1	IGHG4	0	IGHG4
61460	0	0.252248	1	IGKC	0	IGKC
61462	0	0.252248	1	SYTL3	0	SYTL3
61466	0	0.252248	1	GPR111	0	GPR111
61472	0	0.252248	1	MORC1	0	MORC1
61474	0	0.252248	1	IGKV1-5	0	IGKV1-5
61479	0	0.252248	1	IGHM	0	IGHM
61481	0	0.252248	1	LOC377711	0	LOC377711
61486	0	0.252248	1	PCDH15	0	PCDH15
61488	0	0.252248	1	GRM4	0	GRM4
61490	0	0.252248	1	CUBN	0	CUBN
61492	0	0.252248	1	C4A	0	C4A
61494	0	0.252248	1	JARID1A	0	JARID1A
61496	0	0.252248	1	CBX4	0	CBX4
61498	0	0.252248	1	KCNQ1	0	KCNQ1
61500	0	0.252248	1	MSMB	0	MSMB
61504	0	0.252248	1	IL1B	0	IL1B
61506	0	0.252248	1	SUSD5	0	SUSD5
61508	0	0.252248	1	LOC92017	0	LOC92017
61510	0	0.252248	1	MCF2	0	MCF2
61512	0	0.252248	1	RIMS1	0	RIMS1
61520	0	0.252248	1	SCAF1	0	SCAF1
61524	0	0.252248	1	GRM5	0	GRM5
61532	0	0.252248	1	UNC5A	0	UNC5A
61534	0	0.252248	1	SSX2B;SSX2	0	SSX2B;SSX2
61542	0	0.252248	1	C14orf25	0	C14orf25
61544	0	0.252248	1	HIST1H2AH	0	HIST1H2AH
61546	0	0.252248	1	BRWD2	0	BRWD2
61549	0	0.252248	1	DOPEY1	0	DOPEY1
61553	0	0.252248	1	IGHG2	0	IGHG2
61561	0	0.252248	1	CACNA1E	0	CACNA1E
61565	0	0.252248	1	LOC642197	0	LOC642197
61569	0	0.252248	1	MST1R	0	MST1R
61571	0	0.252248	1	PPIA;LOC654188;PPIAL3	0	PPIA;LOC654188;PPIAL3
61573	0	0.252248	1	LDB1	0	LDB1
61575	0	0.252248	1	STC1	0	STC1
61577	0	0.252248	1	ATP5B	0	ATP5B
61583	0	0.252248	1	CNTNAP5	0	CNTNAP5
61585	0	0.252248	1	HBA2;HBA1	0	HBA2;HBA1
61589	0	0.252248	1	INPP5B	0	INPP5B
61591	0	0.252248	1	FAM40B	0	FAM40B
61595	0	0.252248	1	IGHG1	0	IGHG1
61609	0	0.252248	1	DNAH11	0	DNAH11
61611	0	0.252248	1	ZNF409	0	ZNF409
61616	0	0.252248	1	LOC441294	0	LOC441294
61618	0	0.252248	1	C17orf37	0	C17orf37
61622	0	0.252248	1	ZNF14	0	ZNF14
61631	0	0.252248	1	ZNF330	0	ZNF330
61633	0	0.252248	1	RGAG1	0	RGAG1
61639	0	0.252248	1	LTBP3	0	LTBP3
61643	0	0.252248	1	OR1F2	0	OR1F2
61645	0	0.252248	1	IGL@	0	IGL@
61647	0	0.252248	1	CTGLF1	0	CTGLF1
61649	0	0.252248	1	RGS12	0	RGS12
61655	0	0.252248	1	DIP2A	0	DIP2A
61657	0	0.252248	1	KIFC1	0	KIFC1
61659	0	0.252248	1	C12orf32	0	C12orf32
61661	0	0.252248	1	FGG	0	FGG
61665	0	0.252248	1	Histone	0	Histone
61669	0	0.252248	1	RP11-297H3.4	0	RP11-297H3.4
61679	0	0.252248	1	MAZ	0	MAZ
61681	0	0.252248	1	SERPINA1	0	SERPINA1
61683	0	0.252248	1	LOC388177	0	LOC388177
61687	0	0.252248	1	TTC26	0	TTC26
61691	0	0.252248	1	MT-CO1	0	MT-CO1
61693	0	0.252248	1	SMG6	0	SMG6
61695	0	0.252248	1	MFSD4A	0	MFSD4A
61697	0	0.252248	1	OR1I1	0	OR1I1
61703	0	0.252248	1	ZYG11A	0	ZYG11A
61707	0	0.252248	1	PATL1	0	PATL1
61711	0	0.252248	1	JSRP1	0	JSRP1
61713	0	0.252248	1	OLFML1	0	OLFML1
61717	0	0.252248	1	TRAPPC6B	0	TRAPPC6B
61719	0	0.252248	1	SLC34A2	0	SLC34A2
61721	0	0.252248	1	ATP13A1	0	ATP13A1
61729	0	0.252248	1	OR51B4	0	OR51B4
61733	0	0.252248	1	PIGW	0	PIGW
61743	0	0.252248	1	SMIM24	0	SMIM24
61745	0	0.250253	1	ABCB1	0	ABCB1
61750	0	0.250253	1	ADH2	0	ADH2
61752	0	0.250253	1	ADIPOQ	0	ADIPOQ
61754	0	0.250253	1	ALDH2	0	ALDH2
61756	0	0.250253	1	AMPD1	0	AMPD1
61763	0	0.250253	1	APOB	0	APOB
61765	0	0.250253	1	APRT	0	APRT
61767	0	0.250253	1	BAZ2A	0	BAZ2A
61771	0	0.250253	1	BRCA2	0	BRCA2
61777	0	0.250253	1	COL22A1	0	COL22A1
61779	0	0.250253	1	COl2A1	0	COl2A1
61781	0	0.250253	1	CR2	0	CR2
61783	0	0.250253	1	CREB2	0	CREB2
61785	0	0.250253	1	DNAH12	0	DNAH12
61787	0	0.250253	1	ECE1	0	ECE1
61797	0	0.250253	1	GRIK1	0	GRIK1
61799	0	0.250253	1	GRIN3A	0	GRIN3A
61801	0	0.250253	1	HIF1 A	0	HIF1 A
61805	0	0.250253	1	IL23	0	IL23
61807	0	0.250253	1	KDR	0	KDR
61813	0	0.250253	1	MMP8	0	MMP8
61815	0	0.250253	1	MMP9	0	MMP9
61819	0	0.250253	1	OPG	0	OPG
61821	0	0.250253	1	PAI1	0	PAI1
61823	0	0.250253	1	PLEKHH1	0	PLEKHH1
61825	0	0.250253	1	PON1	0	PON1
61827	0	0.250253	1	F2	0	F2
61829	0	0.250253	1	PTGIR	0	PTGIR
61831	0	0.250253	1	RANKL	0	RANKL
61835	0	0.250253	1	SREBP2	0	SREBP2
61844	0	0.250253	1	TGFBR3	0	TGFBR3
61848	0	0.250253	1	USH1C	0	USH1C
61850	0	0.250253	1	VDR	0	VDR
61852	0	0.250253	1	VEGF	0	VEGF
61858	0	0.491488	1	SLC15A1	0	SLC15A1
61861	0	0.491488	1	LOC728254	0	LOC728254
61863	0	0.491488	1	NUP58	0	NUP58
61865	0	0.491488	1	TTC39A	0	TTC39A
61867	0	0.491488	1	MOP-1	0	MOP-1
61869	0	0.491488	1	ERBB2	0	ERBB2
61871	0	0.491488	1	TMX4	0	TMX4
61873	0	0.491488	1	CSNK1G1	0	CSNK1G1
61875	0	0.491488	1	KIAA1654	0	KIAA1654
61877	0	0.491488	1	ALX4	0	ALX4
61879	0	0.491488	1	DOT1L	0	DOT1L
61881	0	0.491488	1	SSH2	0	SSH2
61883	0	0.491488	1	MAPK8	0	MAPK8
61885	0	0.491488	1	BMPER	0	BMPER
61887	0	0.491488	1	NELL1	0	NELL1
61889	0	0.491488	1	UMODL1	0	UMODL1
61891	0	0.491488	1	SNCAIP	0	SNCAIP
61893	0	0.491488	1	HIF3A	0	HIF3A
61895	0	0.491488	1	TMEM249	0	TMEM249
61897	0	0.491488	1	TNFRSF14	0	TNFRSF14
61899	0	0.491488	1	ATP7A	0	ATP7A
61901	0	0.491488	1	ARAF	0	ARAF
61903	0	0.491488	1	HDGFRP2	0	HDGFRP2
61905	0	0.491488	1	RBM14	0	RBM14
61907	0	0.491488	1	DNM1	0	DNM1
61909	0	0.491488	1	MAML1	0	MAML1
61911	0	0.491488	1	ZNF302	0	ZNF302
61913	0	0.491488	1	KATNB1	0	KATNB1
61915	0	0.491488	1	PSMB2	0	PSMB2
61917	0	0.491488	1	EIF4E2	0	EIF4E2
61919	0	0.491488	1	GLI4	0	GLI4
61921	0	0.491488	1	OR5G5P	0	OR5G5P
61923	0	0.491488	1	PRSS1	0	PRSS1
61925	0	0.491488	1	FAM78B	0	FAM78B
61927	0	0.491488	1	TJP2	0	TJP2
61929	0	0.491488	1	IGHV5-78	0	IGHV5-78
61931	0	0.491488	1	SPG7	0	SPG7
61933	0	0.491488	1	PRO0471	0	PRO0471
61935	0	0.491488	1	KLF12	0	KLF12
61937	0	0.491488	1	ARSD	0	ARSD
61939	0	0.491488	1	GSN-AS1	0	GSN-AS1
61941	0	0.491488	1	OR5P1P	0	OR5P1P
61943	0	0.491488	1	LOC100128922	0	LOC100128922
61945	0	0.491488	1	LOC645261	0	LOC645261
61947	0	0.491488	1	LOC100133131	0	LOC100133131
61949	0	0.491488	1	HLA-B	0	HLA-B
61951	0	0.491488	1	TPT1P8	0	TPT1P8
61953	0	0.491488	1	MGEA5	0	MGEA5
61955	0	0.491488	1	OR5E1P	0	OR5E1P
61958	0	0.491488	1	LYG2	0	LYG2
61960	0	0.491488	1	AIFM2	0	AIFM2
61962	0	0.491488	1	GRK5	0	GRK5
61964	0	0.491488	1	BEST3	0	BEST3
61966	0	0.491488	1	SLC25A37	0	SLC25A37
61968	0	0.491488	1	MT1E	0	MT1E
61970	0	0.491488	1	LCA10	0	LCA10
61972	0	0.491488	1	SMCR2	0	SMCR2
61974	0	0.491488	1	C1GALT1	0	C1GALT1
61976	0	0.491488	1	ENTPD1	0	ENTPD1
61978	0	0.491488	1	RAI1	0	RAI1
61980	0	0.491488	1	POLR2J3	0	POLR2J3
61982	0	0.491488	1	LOC157740	0	LOC157740
61984	0	0.491488	1	MUC5AC	0	MUC5AC
61986	0	0.491488	1	MAP3K21	0	MAP3K21
61988	0	0.491488	1	LY6G6E	0	LY6G6E
61990	0	0.491488	1	LEAP2	0	LEAP2
61992	0	0.491488	1	PHF10	0	PHF10
61994	0	0.491488	1	COL28A1	0	COL28A1
61996	0	0.491488	1	ROR1	0	ROR1
61998	0	0.491488	1	AQR	0	AQR
62000	0	0.491488	1	DONSON	0	DONSON
62002	0	0.491488	1	LOC647070	0	LOC647070
62004	0	0.491488	1	RNASET2	0	RNASET2
62007	0	0.491488	1	TRAPPC3L	0	TRAPPC3L
62009	0	0.491488	1	LOC153811	0	LOC153811
62011	0	0.491488	1	FBXO17	0	FBXO17
62013	0	0.491488	1	LRRC1	0	LRRC1
62015	0	0.491488	1	COL27A1	0	COL27A1
62017	0	0.491488	1	TRMT44	0	TRMT44
62019	0	0.491488	1	COPE	0	COPE
62021	0	0.491488	1	NAMPT	0	NAMPT
62023	0	0.491488	1	LINC01949	0	LINC01949
62025	0	0.491488	1	FNBP1	0	FNBP1
62027	0	0.491488	1	HS3ST3B1	0	HS3ST3B1
62029	0	0.491488	1	FLJ13773	0	FLJ13773
62031	0	0.491488	1	DPF3	0	DPF3
62033	0	0.491488	1	CNIH4	0	CNIH4
62035	0	0.491488	1	TBC1D27	0	TBC1D27
62037	0	0.491488	1	ZNF598	0	ZNF598
62039	0	0.491488	1	GATA2-AS1	0	GATA2-AS1
62041	0	0.491488	1	FLJ21408	0	FLJ21408
62043	0	0.491488	1	LOC728061	0	LOC728061
62045	0	0.491488	1	LINC00923	0	LINC00923
62047	0	0.491488	1	MAGIX	0	MAGIX
62049	0	0.491488	1	SLC35F5	0	SLC35F5
62051	0	0.491488	1	LZIC	0	LZIC
62053	0	0.491488	1	ALPK1	0	ALPK1
62055	0	0.491488	1	PRORY	0	PRORY
62057	0	0.491488	1	GOLGA2P10	0	GOLGA2P10
62059	0	0.491488	1	MIATNB	0	MIATNB
62061	0	0.491488	1	FAM224A	0	FAM224A
62063	0	0.491488	1	DYNLT1	0	DYNLT1
62065	0	0.491488	1	BPTF	0	BPTF
62067	0	0.491488	1	LOC100129447	0	LOC100129447
62069	0	0.491488	1	LOC200830	0	LOC200830
62071	0	0.491488	1	MARVELD2	0	MARVELD2
62073	0	0.491488	1	LOC284244	0	LOC284244
62075	0	0.491488	1	LINC01529	0	LINC01529
62077	0	0.491488	1	RPL23AP7	0	RPL23AP7
62079	0	0.491488	1	RSPH9	0	RSPH9
62081	0	0.491488	1	LOC400662	0	LOC400662
62083	0	0.491488	1	FLJ30901	0	FLJ30901
62085	0	0.491488	1	LOC728705	0	LOC728705
62087	0	0.491488	1	LOC153546	0	LOC153546
62089	0	0.491488	1	FNDC3A	0	FNDC3A
62091	0	0.491488	1	JAM2	0	JAM2
62093	0	0.491488	1	LINC01793	0	LINC01793
62095	0	0.491488	1	RPRD1A	0	RPRD1A
62097	0	0.491488	1	IPO5P1	0	IPO5P1
62099	0	0.491488	1	COQ3	0	COQ3
62101	0	0.491488	1	LOC643659	0	LOC643659
62103	0	0.491488	1	PCGF3	0	PCGF3
62105	0	0.491488	1	FAM234A	0	FAM234A
62107	0	0.491488	1	VWA5B1	0	VWA5B1
62109	0	0.491488	1	LOC646588	0	LOC646588
62111	0	0.491488	1	LOC729866	0	LOC729866
62113	0	0.491488	1	CCDC88B	0	CCDC88B
62115	0	0.491488	1	ARHGAP21	0	ARHGAP21
62117	0	0.491488	1	NOTCH2NL	0	NOTCH2NL
62119	0	0.491488	1	TCAF2	0	TCAF2
62121	0	0.491488	1	NLRC3	0	NLRC3
62123	0	0.491488	1	KIRREL	0	KIRREL
62125	0	0.491488	1	LOC100127940	0	LOC100127940
62127	0	0.491488	1	SORD	0	SORD
62129	0	0.491488	1	RNF180	0	RNF180
62131	0	0.491488	1	LOC286063	0	LOC286063
62133	0	0.491488	1	ZNF329	0	ZNF329
62135	0	0.491488	1	LINC01184	0	LINC01184
62137	0	0.491488	1	FAM198A	0	FAM198A
62139	0	0.491488	1	LOC105370941	0	LOC105370941
62141	0	0.491488	1	PTPN2	0	PTPN2
62143	0	0.491488	1	LOC102723701	0	LOC102723701
62145	0	0.491488	1	NDUFA10	0	NDUFA10
62147	0	0.491488	1	WDFY3	0	WDFY3
62149	0	0.491488	1	MYNN	0	MYNN
62151	0	0.491488	1	LOC100129455	0	LOC100129455
62153	0	0.491488	1	LOC100131581	0	LOC100131581
62156	0	0.491488	1	LOC100129406	0	LOC100129406
62158	0	0.491488	1	LOC100131894	0	LOC100131894
62160	0	0.491488	1	LOC100131315	0	LOC100131315
62162	0	0.491488	1	LOC100289470	0	LOC100289470
62164	0	0.491488	1	CASC22	0	CASC22
62166	0	0.491488	1	TCP11X2	0	TCP11X2
62168	0	0.491488	1	SSPO	0	SSPO
62170	0	0.491488	1	FAM95B1; LOC105379252	0	FAM95B1; LOC105379252
62172	0	0.491488	1	PPIEL	0	PPIEL
62175	0	0.491488	1	RTBDN	0	RTBDN
62177	0	0.491488	1	LOC728903	0	LOC728903
62181	0	0.491488	1	LOC100130278	0	LOC100130278
62183	0	0.491488	1	NALCN	0	NALCN
62185	0	0.491488	1	LOC645427	0	LOC645427
62187	0	0.491488	1	LOC284581	0	LOC284581
62189	0	0.491488	1	PDXK	0	PDXK
62191	0	0.491488	1	LOC100130078	0	LOC100130078
62193	0	0.491488	1	LINC02067	0	LINC02067
62195	0	0.491488	1	LOC283713	0	LOC283713
62197	0	0.491488	1	LOC497256	0	LOC497256
62199	0	0.491488	1	LOC100130456	0	LOC100130456
62201	0	0.491488	1	LOC286052	0	LOC286052
62203	0	0.491488	1	LOC100129115	0	LOC100129115
62205	0	0.491488	1	LOC100130654	0	LOC100130654
62207	0	0.491488	1	KRT42P	0	KRT42P
62209	0	0.491488	1	MPZL3	0	MPZL3
62211	0	0.491488	1	CCDC129	0	CCDC129
62213	0	0.491488	1	PRKXP1	0	PRKXP1
62215	0	0.491488	1	LOC644727	0	LOC644727
62217	0	0.491488	1	GALT	0	GALT
62219	0	0.491488	1	FLJ38773	0	FLJ38773
62221	0	0.491488	1	LOC284513	0	LOC284513
62223	0	0.491488	1	OXR1	0	OXR1
62225	0	0.491488	1	PGM5P2	0	PGM5P2
62227	0	0.491488	1	LOC100131150	0	LOC100131150
62229	0	0.491488	1	LOC100130433	0	LOC100130433
62231	0	0.491488	1	LOC283075	0	LOC283075
62233	0	0.491488	1	LOC100132363	0	LOC100132363
62235	0	0.491488	1	LOC100130713	0	LOC100130713
62237	0	0.491488	1	RAC2	0	RAC2
62239	0	0.491488	1	LOC100130417	0	LOC100130417
62241	0	0.491488	1	LOC285191	0	LOC285191
62243	0	0.491488	1	C5orf56	0	C5orf56
62245	0	0.491488	1	MAFIP	0	MAFIP
62247	0	0.491488	1	LOC101928343	0	LOC101928343
62249	0	0.491488	1	CARD11	0	CARD11
62251	0	0.491488	1	LOC101927759	0	LOC101927759
62253	0	0.491488	1	FLJ40039	0	FLJ40039
62255	0	0.491488	1	SPEM1	0	SPEM1
62257	0	0.491488	1	LOC283352	0	LOC283352
62259	0	0.491488	1	LOC100129648	0	LOC100129648
62261	0	0.491488	1	LOC100131195	0	LOC100131195
62263	0	0.491488	1	LOC643549	0	LOC643549
62265	0	0.491488	1	LZTS2	0	LZTS2
62267	0	0.491488	1	LOC400965	0	LOC400965
62269	0	0.491488	1	FLJ40712	0	FLJ40712
62271	0	0.491488	1	LOC642335	0	LOC642335
62273	0	0.491488	1	RBM10	0	RBM10
62275	0	0.491488	1	LOC283861	0	LOC283861
62277	0	0.491488	1	LOC100132593	0	LOC100132593
62279	0	0.491488	1	SLC12A5	0	SLC12A5
62281	0	0.491488	1	TMCO5B	0	TMCO5B
62283	0	0.491488	1	HDAC7	0	HDAC7
62285	0	0.491488	1	TBC1D3L	0	TBC1D3L
62288	0	0.491488	1	TAS1R3	0	TAS1R3
62290	0	0.491488	1	LOC100131821	0	LOC100131821
62292	0	0.491488	1	CASTOR2	0	CASTOR2
62294	0	0.491488	1	SLC22A8	0	SLC22A8
62296	0	0.491488	1	FLJ41327	0	FLJ41327
62298	0	0.491488	1	LOC100128429	0	LOC100128429
62300	0	0.491488	1	LOC100132207	0	LOC100132207
62302	0	0.491488	1	LOC642648	0	LOC642648
62304	0	0.491488	1	LOC100128107	0	LOC100128107
62306	0	0.491488	1	CYTH1	0	CYTH1
62308	0	0.491488	1	LOC100131829	0	LOC100131829
62310	0	0.491488	1	FLJ42022	0	FLJ42022
62312	0	0.491488	1	RASGRP2	0	RASGRP2
62314	0	0.491488	1	TMEM262	0	TMEM262
62317	0	0.491488	1	LOC100128170	0	LOC100128170
62319	0	0.491488	1	LOC100130476	0	LOC100130476
62321	0	0.491488	1	CCNDBP1	0	CCNDBP1
62323	0	0.491488	1	LINC01684	0	LINC01684
62325	0	0.491488	1	LOC100131043	0	LOC100131043
62327	0	0.491488	1	LOC100128400	0	LOC100128400
62329	0	0.491488	1	LOC100130642	0	LOC100130642
62331	0	0.491488	1	VAV2	0	VAV2
62333	0	0.491488	1	DENND2C	0	DENND2C
62335	0	0.491488	1	LOC100131000	0	LOC100131000
62338	0	0.491488	1	SRGAP2	0	SRGAP2
62341	0	0.491488	1	PDS5A	0	PDS5A
62343	0	0.491488	1	LOC100128402	0	LOC100128402
62345	0	0.491488	1	RNF212	0	RNF212
62347	0	0.491488	1	MEG3	0	MEG3
62349	0	0.491488	1	FAM99A	0	FAM99A
62351	0	0.491488	1	CRHR1	0	CRHR1
62353	0	0.491488	1	KCTD21-AS1	0	KCTD21-AS1
62355	0	0.491488	1	LOC100128198	0	LOC100128198
62357	0	0.491488	1	LOC441268	0	LOC441268
62359	0	0.491488	1	FAM20C	0	FAM20C
62361	0	0.491488	1	DENND3	0	DENND3
62363	0	0.491488	1	BNIP2	0	BNIP2
62365	0	0.491488	1	VKORC1	0	VKORC1
62367	0	0.491488	1	FLNA	0	FLNA
62369	0	0.491488	1	TBC1D22A	0	TBC1D22A
62371	0	0.491488	1	LOC100129724	0	LOC100129724
62373	0	0.491488	1	BBIP1	0	BBIP1
62375	0	0.491488	1	KALRN	0	KALRN
62377	0	0.491488	1	LRRC37BP1	0	LRRC37BP1
62380	0	0.491488	1	LOC728684	0	LOC728684
62382	0	0.491488	1	PCBP3	0	PCBP3
62384	0	0.491488	1	LOC100131099	0	LOC100131099
62386	0	0.491488	1	LOC645645	0	LOC645645
62388	0	0.491488	1	PRSS29P	0	PRSS29P
62390	0	0.491488	1	LOC100131190	0	LOC100131190
62392	0	0.491488	1	LOC100129763	0	LOC100129763
62394	0	0.491488	1	PKP4-AS1	0	PKP4-AS1
62396	0	0.491488	1	FLJ44385	0	FLJ44385
62398	0	0.491488	1	FLJ44477	0	FLJ44477
62400	0	0.491488	1	CLDN4	0	CLDN4
62402	0	0.491488	1	CSRP1	0	CSRP1
62404	0	0.491488	1	TMA7	0	TMA7
62406	0	0.491488	1	LOC100128494	0	LOC100128494
62408	0	0.491488	1	LOC100129721	0	LOC100129721
62410	0	0.491488	1	LOC101928953	0	LOC101928953
62412	0	0.491488	1	LOC100130419	0	LOC100130419
62414	0	0.491488	1	LOC647983	0	LOC647983
62417	0	0.491488	1	LOC644285	0	LOC644285
62419	0	0.491488	1	LOC100129111	0	LOC100129111
62421	0	0.491488	1	LOC100128670	0	LOC100128670
62424	0	0.491488	1	BCAR1	0	BCAR1
62426	0	0.491488	1	LOC100127955	0	LOC100127955
62428	0	0.491488	1	LOC100289580	0	LOC100289580
62430	0	0.491488	1	LOC101929106	0	LOC101929106
62432	0	0.491488	1	DNAH10OS	0	DNAH10OS
62434	0	0.491488	1	LOC100130741	0	LOC100130741
62436	0	0.491488	1	LOC401557	0	LOC401557
62438	0	0.491488	1	ASPSCR1	0	ASPSCR1
62440	0	0.491488	1	CFAP74	0	CFAP74
62442	0	0.491488	1	FLJ45482	0	FLJ45482
62444	0	0.491488	1	LOC100132495	0	LOC100132495
62446	0	0.491488	1	LOC100130429	0	LOC100130429
62448	0	0.491488	1	LOC100130587	0	LOC100130587
62450	0	0.491488	1	LOC400212	0	LOC400212
62452	0	0.491488	1	C2orf49	0	C2orf49
62454	0	0.491488	1	LOC100128333	0	LOC100128333
62456	0	0.491488	1	LOC401433	0	LOC401433
62458	0	0.491488	1	LOC643936	0	LOC643936
62460	0	0.491488	1	NDUFS7	0	NDUFS7
62462	0	0.491488	1	LOC100130152	0	LOC100130152
62464	0	0.491488	1	LOC400968	0	LOC400968
62466	0	0.491488	1	LOC728673	0	LOC728673
62468	0	0.491488	1	LOC400743	0	LOC400743
62470	0	0.491488	1	LOXHD1	0	LOXHD1
62472	0	0.491488	1	LOC100129373	0	LOC100129373
62474	0	0.491488	1	TRAV20	0	TRAV20
62476	0	0.491488	1	TNRC18P1	0	TNRC18P1
62478	0	0.491488	1	LDHAL6FP	0	LDHAL6FP
62480	0	0.491488	1	LOC102723968	0	LOC102723968
62483	0	0.491488	1	LOC100129869	0	LOC100129869
62485	0	0.491488	1	LOC100128184	0	LOC100128184
62487	0	0.491488	1	C1QTNF6	0	C1QTNF6
62489	0	0.491488	1	LOC100128348	0	LOC100128348
62491	0	0.491488	1	LOC100129186	0	LOC100129186
62493	0	0.491488	1	LOC100130768	0	LOC100130768
62495	0	0.491488	1	MTMR14	0	MTMR14
62497	0	0.491488	1	SLC4A8	0	SLC4A8
62499	0	0.491488	1	LOC100130913	0	LOC100130913
62501	0	0.491488	1	VAC14	0	VAC14
62503	0	0.491488	1	LOC100129974	0	LOC100129974
62505	0	0.491488	1	LOC100134237	0	LOC100134237
62507	0	0.491488	1	HMCN2	0	HMCN2
62509	0	0.491488	1	FLJ46875	0	FLJ46875
62511	0	0.491488	1	LOC100132790	0	LOC100132790
62514	0	0.491488	1	LOC100034248	0	LOC100034248
62516	0	0.491488	1	LOC100128703	0	LOC100128703
62518	0	0.491488	1	LOC100507236	0	LOC100507236
62520	0	0.491488	1	LOC100131831	0	LOC100131831
62522	0	0.491488	1	EPS15	0	EPS15
62524	0	0.491488	1	THRB-AS1	0	THRB-AS1
62526	0	0.491488	1	LOC644686	0	LOC644686
62528	0	0.491488	1	LINC02138	0	LINC02138
62530	0	0.491488	1	LINC02213	0	LINC02213
62532	0	0.491488	1	RPS2P47	0	RPS2P47
62534	0	0.491488	1	FGD2	0	FGD2
62536	0	0.491488	1	ADAMTS7P1	0	ADAMTS7P1
62538	0	0.491488	1	ZSCAN30	0	ZSCAN30
62540	0	0.491488	1	LOC441666	0	LOC441666
62542	0	0.491488	1	SLC37A3	0	SLC37A3
62544	0	0.491488	1	SEC14L3	0	SEC14L3
62547	0	0.491488	1	LOC642980	0	LOC642980
62549	0	0.491488	1	TRIO	0	TRIO
62551	0	0.491488	1	EML6	0	EML6
62553	0	0.491488	1	ANK3	0	ANK3
62555	0	0.491488	1	TPTEP1	0	TPTEP1
62557	0	0.491488	1	TRMT13	0	TRMT13
62559	0	0.491488	1	BST2	0	BST2
62561	0	0.491488	1	SNAPC5	0	SNAPC5
62563	0	0.491488	1	METTL26	0	METTL26
62565	0	0.491488	1	KCNQ2	0	KCNQ2
62567	0	0.491488	1	ERCC5	0	ERCC5
62569	0	0.491488	1	GTPBP6	0	GTPBP6
62571	0	0.491488	1	GABRB1	0	GABRB1
62573	0	0.491488	1	SYNJ2	0	SYNJ2
62575	0	0.491488	1	USP42	0	USP42
62577	0	0.491488	1	KRT87P	0	KRT87P
62579	0	0.491488	1	PPP3CB	0	PPP3CB
62581	0	0.491488	1	ST7L	0	ST7L
62583	0	0.491488	1	ATMIN	0	ATMIN
62586	0	0.491488	1	CFAP65	0	CFAP65
62589	0	0.491488	1	KMT5C	0	KMT5C
62591	0	0.491488	1	PMPCA	0	PMPCA
62593	0	0.491488	1	ANKDD1A	0	ANKDD1A
62595	0	0.491488	1	CELA3A	0	CELA3A
62597	0	0.491488	1	MAPK12	0	MAPK12
62599	0	0.491488	1	BAD	0	BAD
62601	0	0.491488	1	CD72	0	CD72
62603	0	0.491488	1	PTGR1	0	PTGR1
62605	0	0.491488	1	DPP6	0	DPP6
62607	0	0.491488	1	RASSF1	0	RASSF1
62609	0	0.491488	1	LINC00893	0	LINC00893
62611	0	0.491488	1	UBA5	0	UBA5
62613	0	0.491488	1	SVIL	0	SVIL
62615	0	0.491488	1	ROPN1	0	ROPN1
62617	0	0.491488	1	LPIN1	0	LPIN1
62619	0	0.491488	1	PRAF2	0	PRAF2
62621	0	0.491488	1	CD2	0	CD2
62623	0	0.491488	1	PKDCC	0	PKDCC
62625	0	0.491488	1	SPX	0	SPX
62627	0	0.491488	1	STARD7-AS1	0	STARD7-AS1
62629	0	0.491488	1	SNX8	0	SNX8
62631	0	0.491488	1	MINOS1P1	0	MINOS1P1
62633	0	0.491488	1	TBCD	0	TBCD
62635	0	0.491488	1	LOC101060157	0	LOC101060157
62637	0	0.491488	1	CNOT3	0	CNOT3
62639	0	0.491488	1	ZMYM2	0	ZMYM2
62641	0	0.491488	1	CCDC57	0	CCDC57
62643	0	0.491488	1	LINC00917	0	LINC00917
62645	0	0.491488	1	LOC145945	0	LOC145945
62647	0	0.491488	1	MIR3142HG	0	MIR3142HG
62649	0	0.491488	1	UVSSA	0	UVSSA
62651	0	0.491488	1	LOC284240	0	LOC284240
62653	0	0.491488	1	LOC81787	0	LOC81787
62655	0	0.491488	1	LOC399716	0	LOC399716
62657	0	0.491488	1	ATOH8	0	ATOH8
62659	0	0.491488	1	CALML3-AS1	0	CALML3-AS1
62661	0	0.491488	1	HACD2	0	HACD2
62663	0	0.491488	1	PGA3	0	PGA3
62665	0	0.491488	1	ABI3BP	0	ABI3BP
62667	0	0.491488	1	PYGO1	0	PYGO1
62669	0	0.491488	1	LOC283911	0	LOC283911
62671	0	0.491488	1	KIF3A	0	KIF3A
62673	0	0.491488	1	TRIM64EP	0	TRIM64EP
62676	0	0.491488	1	S100A7A	0	S100A7A
62678	0	0.491488	1	DACOR1	0	DACOR1
62680	0	0.491488	1	KANK3	0	KANK3
62682	0	0.491488	1	KLHDC4	0	KLHDC4
62685	0	0.491488	1	ZSCAN1	0	ZSCAN1
62687	0	0.491488	1	LINC01297	0	LINC01297
62689	0	0.491488	1	HIP1	0	HIP1
62691	0	0.491488	1	ARID5A	0	ARID5A
62693	0	0.491488	1	SLMAP	0	SLMAP
62695	0	0.491488	1	LOC100132099	0	LOC100132099
62697	0	0.491488	1	LOC646513	0	LOC646513
62699	0	0.491488	1	CLEC2A	0	CLEC2A
62701	0	0.491488	1	SH3KBP1	0	SH3KBP1
62703	0	0.491488	1	HCRP1	0	HCRP1
62705	0	0.491488	1	PLCD4	0	PLCD4
62707	0	0.491488	1	CYP2A13	0	CYP2A13
62709	0	0.491488	1	LOC646743	0	LOC646743
62711	0	0.491488	1	DEFA7P	0	DEFA7P
62713	0	0.491488	1	DEFA9P	0	DEFA9P
62715	0	0.491488	1	KLK13	0	KLK13
62717	0	0.491488	1	HSP90AB5P	0	HSP90AB5P
62719	0	0.491488	1	ATP13A2	0	ATP13A2
62721	0	0.491488	1	LINC00260	0	LINC00260
62723	0	0.491488	1	SLC45A2	0	SLC45A2
62725	0	0.491488	1	MGC10814	0	MGC10814
62727	0	0.491488	1	LOC105371184	0	LOC105371184
62729	0	0.491488	1	LAT2	0	LAT2
62731	0	0.491488	1	UPK1A-AS1	0	UPK1A-AS1
62733	0	0.491488	1	BFSP2-AS1	0	BFSP2-AS1
62735	0	0.491488	1	RGR	0	RGR
62737	0	0.491488	1	HLA-DQA1	0	HLA-DQA1
62739	0	0.491488	1	C14orf159	0	C14orf159
62741	0	0.491488	1	RRN3P1	0	RRN3P1
62743	0	0.491488	1	LOC642862	0	LOC642862
62745	0	0.491488	1	GLB1L3	0	GLB1L3
62747	0	0.491488	1	ZNF587	0	ZNF587
62749	0	0.491488	1	HES2	0	HES2
62751	0	0.491488	1	UTY	0	UTY
62753	0	0.491488	1	IGLL5	0	IGLL5
62755	0	0.491488	1	CSAG4	0	CSAG4
62757	0	0.491488	1	FBRSL1	0	FBRSL1
62759	0	0.491488	1	DDIT4L	0	DDIT4L
62761	0	0.491488	1	PHBP19	0	PHBP19
62763	0	0.491488	1	ZNF527	0	ZNF527
62765	0	0.491488	1	LAMA5	0	LAMA5
62767	0	0.491488	1	RNF208	0	RNF208
62769	0	0.491488	1	ICMT	0	ICMT
62771	0	0.491488	1	RPS21	0	RPS21
62773	0	0.491488	1	AMD1P3	0	AMD1P3
62775	0	0.491488	1	TDRD3	0	TDRD3
62777	0	0.491488	1	TLN1	0	TLN1
62779	0	0.491488	1	KLHL14	0	KLHL14
62781	0	0.491488	1	ZNF248	0	ZNF248
62783	0	0.491488	1	ANKRD20A5P	0	ANKRD20A5P
62785	0	0.491488	1	SPATA21	0	SPATA21
62787	0	0.491488	1	MORN4	0	MORN4
62789	0	0.491488	1	LOC152048	0	LOC152048
62791	0	0.491488	1	PLGLB2	0	PLGLB2
62793	0	0.491488	1	IGLV6-57	0	IGLV6-57
62795	0	0.491488	1	LILRB4	0	LILRB4
62797	0	0.491488	1	C16orf52	0	C16orf52
62799	0	0.491488	1	C1orf145	0	C1orf145
62801	0	0.491488	1	GRASPOS	0	GRASPOS
62803	0	0.491488	1	SLIT1	0	SLIT1
62805	0	0.491488	1	VPS53	0	VPS53
62807	0	0.491488	1	SNX29	0	SNX29
62809	0	0.491488	1	SNX22	0	SNX22
62811	0	0.491488	1	LOC654342	0	LOC654342
62813	0	0.491488	1	ANKS1A	0	ANKS1A
62815	0	0.491488	1	GRIA3	0	GRIA3
62817	0	0.491488	1	MGAT4EP	0	MGAT4EP
62819	0	0.491488	1	LOC285043	0	LOC285043
62821	0	0.491488	1	ARAFP2	0	ARAFP2
62823	0	0.491488	1	DNAH2	0	DNAH2
62825	0	0.491488	1	LOC730961	0	LOC730961
62827	0	0.491488	1	LYPD4	0	LYPD4
62829	0	0.491488	1	MGC34796	0	MGC34796
62831	0	0.491488	1	LOC100134937	0	LOC100134937
62833	0	0.491488	1	GJD4	0	GJD4
62835	0	0.491488	1	LINC01783	0	LINC01783
62838	0	0.491488	1	PRODH	0	PRODH
62840	0	0.491488	1	ECM2	0	ECM2
62842	0	0.491488	1	SRGAP2C	0	SRGAP2C
62844	0	0.491488	1	LOC439951	0	LOC439951
62846	0	0.491488	1	LOC284263	0	LOC284263
62848	0	0.491488	1	LOC100129603	0	LOC100129603
62850	0	0.491488	1	LINC02029	0	LINC02029
62852	0	0.491488	1	PHLDB2	0	PHLDB2
62854	0	0.491488	1	GABRB3	0	GABRB3
62856	0	0.491488	1	NUPL2	0	NUPL2
62858	0	0.491488	1	MED14OS	0	MED14OS
62860	0	0.491488	1	ZNF81	0	ZNF81
62863	0	0.491488	1	LOC729224	0	LOC729224
62865	0	0.491488	1	ARHGEF10	0	ARHGEF10
62868	0	0.491488	1	RABL2B	0	RABL2B
62870	0	0.491488	1	OTOA	0	OTOA
62872	0	0.491488	1	LOC340340	0	LOC340340
62875	0	0.491488	1	PRR14L	0	PRR14L
62877	0	0.491488	1	TCL6	0	TCL6
62879	0	0.491488	1	KIF26B	0	KIF26B
62881	0	0.491488	1	LOC338620	0	LOC338620
62883	0	0.491488	1	AIDA	0	AIDA
62885	0	0.491488	1	C19orf68	0	C19orf68
62887	0	0.491488	1	GLP2R	0	GLP2R
62889	0	0.491488	1	CBWD5	0	CBWD5
62891	0	0.491488	1	LOC339468	0	LOC339468
62893	0	0.491488	1	CIDECP	0	CIDECP
62895	0	0.491488	1	RAB6C-AS1	0	RAB6C-AS1
62897	0	0.491488	1	NOS2P3	0	NOS2P3
62899	0	0.491488	1	SMIM11A	0	SMIM11A
62901	0	0.491488	1	C12orf76	0	C12orf76
62903	0	0.491488	1	SUZ12P1	0	SUZ12P1
62905	0	0.491488	1	LOC284933	0	LOC284933
62907	0	0.491488	1	LOC729291	0	LOC729291
62909	0	0.491488	1	KCNQ5	0	KCNQ5
62911	0	0.491488	1	CEP104	0	CEP104
62913	0	0.491488	1	CTBP2	0	CTBP2
62915	0	0.491488	1	LOC729887	0	LOC729887
62917	0	0.491488	1	ZNF550	0	ZNF550
62919	0	0.491488	1	POGZ	0	POGZ
62921	0	0.491488	1	BCL7C	0	BCL7C
62923	0	0.491488	1	MCOLN3	0	MCOLN3
62925	0	0.491488	1	SLC2A14	0	SLC2A14
62927	0	0.491488	1	IGFL2-AS1	0	IGFL2-AS1
62929	0	0.491488	1	HEATR5A	0	HEATR5A
62931	0	0.491488	1	VTCN1	0	VTCN1
62933	0	0.491488	1	SH3TC1	0	SH3TC1
62935	0	0.491488	1	TRIM46	0	TRIM46
62937	0	0.491488	1	NR1D2	0	NR1D2
62939	0	0.491488	1	HNRNPA1	0	HNRNPA1
62941	0	0.491488	1	RPSAP36	0	RPSAP36
62943	0	0.491488	1	ZNF761	0	ZNF761
62945	0	0.491488	1	RPS20P27	0	RPS20P27
62947	0	0.491488	1	EBPL	0	EBPL
62949	0	0.491488	1	IGHV4-31	0	IGHV4-31
62951	0	0.491488	1	DAAM2	0	DAAM2
62953	0	0.491488	1	SNRPN	0	SNRPN
62955	0	0.491488	1	FUT11	0	FUT11
62957	0	0.491488	1	LINC00469	0	LINC00469
62959	0	0.491488	1	TWIST2	0	TWIST2
62961	0	0.491488	1	TTLL9	0	TTLL9
62963	0	0.491488	1	SYNGR2	0	SYNGR2
62965	0	0.491488	1	NRK	0	NRK
62967	0	0.491488	1	SH2D6	0	SH2D6
62969	0	0.491488	1	WIPF1	0	WIPF1
62971	0	0.491488	1	LINC00537	0	LINC00537
62973	0	0.491488	1	RASSF2	0	RASSF2
62975	0	0.491488	1	DENND2A	0	DENND2A
62977	0	0.491488	1	EEF1DP3	0	EEF1DP3
62979	0	0.491488	1	FAM25C	0	FAM25C
62981	0	0.491488	1	LINC00355	0	LINC00355
62983	0	0.491488	1	BCOR	0	BCOR
62985	0	0.491488	1	HIST1H4C	0	HIST1H4C
62987	0	0.491488	1	LOC642947	0	LOC642947
62989	0	0.491488	1	LOC101928673	0	LOC101928673
62991	0	0.491488	1	LOC643454	0	LOC643454
62993	0	0.491488	1	LIN28B-AS1	0	LIN28B-AS1
62995	0	0.491488	1	LIMD1	0	LIMD1
62997	0	0.491488	1	LOC731075	0	LOC731075
62999	0	0.491488	1	LOC100128233	0	LOC100128233
63001	0	0.491488	1	EFCAB11	0	EFCAB11
63004	0	0.491488	1	FRY	0	FRY
63006	0	0.491488	1	ZNF528-AS1	0	ZNF528-AS1
63008	0	0.491488	1	GPR17	0	GPR17
63010	0	0.491488	1	ACTR3C	0	ACTR3C
63012	0	0.491488	1	LYSMD4	0	LYSMD4
63014	0	0.491488	1	HNRNPA2B1	0	HNRNPA2B1
63016	0	0.491488	1	DKFZp686M1136	0	DKFZp686M1136
63018	0	0.491488	1	PDXDC2P-NPIPB14P	0	PDXDC2P-NPIPB14P
63020	0	0.491488	1	ACTG1P20	0	ACTG1P20
63022	0	0.491488	1	EHMT2	0	EHMT2
63024	0	0.491488	1	MAPK4	0	MAPK4
63026	0	0.491488	1	LINC01498	0	LINC01498
63028	0	0.491488	1	CEP68	0	CEP68
63030	0	0.491488	1	PANK3	0	PANK3
63032	0	0.491488	1	LOC157562	0	LOC157562
63034	0	0.491488	1	LOC102724804	0	LOC102724804
63036	0	0.491488	1	LINC01574	0	LINC01574
63038	0	0.491488	1	STARD9	0	STARD9
63040	0	0.491488	1	ZNF808	0	ZNF808
63042	0	0.491488	1	ZNF284	0	ZNF284
63044	0	0.491488	1	MSS51	0	MSS51
63046	0	0.491488	1	NBPF19	0	NBPF19
63048	0	0.491488	1	GALC	0	GALC
63050	0	0.491488	1	LINC01605	0	LINC01605
63052	0	0.491488	1	LOC105375297	0	LOC105375297
63054	0	0.491488	1	LOC723805	0	LOC723805
63056	0	0.491488	1	EIF4ENIF1	0	EIF4ENIF1
63058	0	0.491488	1	DUOXA1	0	DUOXA1
63060	0	0.491488	1	CBFA2T2	0	CBFA2T2
63062	0	0.491488	1	LOC101060498	0	LOC101060498
63064	0	0.491488	1	ITGB2	0	ITGB2
63066	0	0.491488	1	ALDOAP2	0	ALDOAP2
63069	0	0.491488	1	HSP90AA2P	0	HSP90AA2P
63071	0	0.491488	1	HTR1D	0	HTR1D
63073	0	0.491488	1	LUADT1	0	LUADT1
63076	0	0.491488	1	ACADM	0	ACADM
63078	0	0.491488	1	ACADVL	0	ACADVL
63080	0	0.491488	1	ACAT1	0	ACAT1
63083	0	0.491488	1	ADA	0	ADA
63085	0	0.491488	1	SGCA	0	SGCA
63087	0	0.491488	1	ADSL	0	ADSL
63089	0	0.491488	1	AGA	0	AGA
63091	0	0.491488	1	AGL	0	AGL
63093	0	0.491488	1	AGT	0	AGT
63095	0	0.491488	1	ABCD1	0	ABCD1
63097	0	0.491488	1	ALDOA	0	ALDOA
63099	0	0.491488	1	ALDOB	0	ALDOB
63101	0	0.491488	1	ANK1	0	ANK1
63104	0	0.491488	1	APOE	0	APOE
63106	0	0.491488	1	FAS	0	FAS
63108	0	0.491488	1	ASS1	0	ASS1
63110	0	0.491488	1	ATM	0	ATM
63113	0	0.491488	1	BCHE	0	BCHE
63115	0	0.491488	1	BCKDHB	0	BCKDHB
63117	0	0.491488	1	BTD	0	BTD
63119	0	0.491488	1	BTK	0	BTK
63121	0	0.491488	1	SERPING1	0	SERPING1
63124	0	0.491488	1	C2	0	C2
63126	0	0.491488	1	C3	0	C3
63129	0	0.491488	1	C8B	0	C8B
63131	0	0.491488	1	CACNA1S	0	CACNA1S
63134	0	0.491488	1	CD3G	0	CD3G
63136	0	0.491488	1	CDKN2A	0	CDKN2A
63138	0	0.491488	1	LYST	0	LYST
63140	0	0.491488	1	ERCC8	0	ERCC8
63142	0	0.491488	1	CLCNKB	0	CLCNKB
63145	0	0.491488	1	COL1A2	0	COL1A2
63147	0	0.491488	1	COL3A1	0	COL3A1
63149	0	0.491488	1	COL5A1	0	COL5A1
63152	0	0.491488	1	COL7A1	0	COL7A1
63154	0	0.491488	1	COMP	0	COMP
63156	0	0.491488	1	CP	0	CP
63159	0	0.491488	1	CPOX	0	CPOX
63161	0	0.491488	1	CSTB	0	CSTB
63163	0	0.491488	1	CYP1B1	0	CYP1B1
63166	0	0.491488	1	DDB2	0	DDB2
63168	0	0.491488	1	DPYD	0	DPYD
63170	0	0.491488	1	TOR1A	0	TOR1A
63172	0	0.491488	1	EDN3	0	EDN3
63174	0	0.491488	1	ENG	0	ENG
63176	0	0.491488	1	EPB42	0	EPB42
63178	0	0.491488	1	EPOR	0	EPOR
63181	0	0.491488	1	ESR1	0	ESR1
63184	0	0.491488	1	ETFA	0	ETFA
63186	0	0.491488	1	EXT1	0	EXT1
63189	0	0.491488	1	F7	0	F7
63191	0	0.491488	1	FAH	0	FAH
63193	0	0.491488	1	FBN1	0	FBN1
63195	0	0.491488	1	FH	0	FH
63197	0	0.491488	1	FUT6	0	FUT6
63199	0	0.491488	1	GAA	0	GAA
63203	0	0.491488	1	GBE1	0	GBE1
63205	0	0.491488	1	GCGR	0	GCGR
63207	0	0.491488	1	GCH1	0	GCH1
63209	0	0.491488	1	GIPR	0	GIPR
63211	0	0.491488	1	GJA1	0	GJA1
63213	0	0.491488	1	GLI3	0	GLI3
63215	0	0.491488	1	GP1BA	0	GP1BA
63217	0	0.491488	1	GPI	0	GPI
63219	0	0.491488	1	MSH6	0	MSH6
63221	0	0.491488	1	GUSB	0	GUSB
63223	0	0.491488	1	HADHA	0	HADHA
63225	0	0.491488	1	HADHB	0	HADHB
63227	0	0.491488	1	CFH	0	CFH
63229	0	0.491488	1	HGD	0	HGD
63231	0	0.491488	1	HMGCL	0	HMGCL
63233	0	0.491488	1	TBX5	0	TBX5
63235	0	0.491488	1	SHH	0	SHH
63237	0	0.491488	1	HPRT1	0	HPRT1
63239	0	0.491488	1	HSD11B2	0	HSD11B2
63241	0	0.491488	1	ICAM1	0	ICAM1
63243	0	0.491488	1	CFI	0	CFI
63245	0	0.491488	1	IL2RG	0	IL2RG
63247	0	0.491488	1	INS	0	INS
63249	0	0.491488	1	INSR	0	INSR
63251	0	0.491488	1	ITGA6	0	ITGA6
63253	0	0.491488	1	ITGB4	0	ITGB4
63255	0	0.491488	1	JAG1	0	JAG1
63257	0	0.491488	1	JAK3	0	JAK3
63259	0	0.491488	1	ANOS1	0	ANOS1
63261	0	0.491488	1	KCNE1	0	KCNE1
63263	0	0.491488	1	KIT	0	KIT
63265	0	0.491488	1	KRT9	0	KRT9
63267	0	0.491488	1	SGCB	0	SGCB
63269	0	0.491488	1	LIG1	0	LIG1
63271	0	0.491488	1	LPL	0	LPL
63273	0	0.491488	1	MEFV	0	MEFV
63275	0	0.491488	1	MET	0	MET
63277	0	0.491488	1	MICA	0	MICA
63280	0	0.491488	1	MLH1	0	MLH1
63283	0	0.491488	1	MSH2	0	MSH2
63286	0	0.491488	1	MTM1	0	MTM1
63289	0	0.491488	1	MYBPC3	0	MYBPC3
63291	0	0.491488	1	MYOC	0	MYOC
63293	0	0.491488	1	NAGA	0	NAGA
63296	0	0.491488	1	NCF1	0	NCF1
63299	0	0.491488	1	NF1	0	NF1
63301	0	0.491488	1	PNP	0	PNP
63303	0	0.491488	1	NPC1	0	NPC1
63307	0	0.491488	1	OCRL	0	OCRL
63309	0	0.491488	1	PAX6	0	PAX6
63312	0	0.491488	1	PDHA1	0	PDHA1
63314	0	0.491488	1	PEPD	0	PEPD
63316	0	0.491488	1	PEX7	0	PEX7
63318	0	0.491488	1	PFKM	0	PFKM
63320	0	0.491488	1	PGK1	0	PGK1
63322	0	0.491488	1	PKD1	0	PKD1
63324	0	0.491488	1	PKD2	0	PKD2
63326	0	0.491488	1	PKLR	0	PKLR
63328	0	0.491488	1	PLOD1	0	PLOD1
63330	0	0.491488	1	PMM2	0	PMM2
63332	0	0.491488	1	PMP22	0	PMP22
63334	0	0.491488	1	PON2	0	PON2
63336	0	0.491488	1	POU3F4	0	POU3F4
63338	0	0.491488	1	CTSA	0	CTSA
63340	0	0.491488	1	PPT1	0	PPT1
63343	0	0.491488	1	PRNP	0	PRNP
63345	0	0.491488	1	PTEN	0	PTEN
63348	0	0.491488	1	PTS	0	PTS
63350	0	0.491488	1	PEX5	0	PEX5
63352	0	0.491488	1	RB1	0	RB1
63354	0	0.491488	1	PRPH2	0	PRPH2
63356	0	0.491488	1	RLBP1	0	RLBP1
63358	0	0.491488	1	ROM1	0	ROM1
63360	0	0.491488	1	RPGR	0	RPGR
63362	0	0.491488	1	RS1	0	RS1
63364	0	0.491488	1	SAA1	0	SAA1
63366	0	0.491488	1	SGCD	0	SGCD
63369	0	0.491488	1	SLC12A3	0	SLC12A3
63371	0	0.491488	1	SLC4A1	0	SLC4A1
63374	0	0.491488	1	SMN1	0	SMN1
63376	0	0.491488	1	SOX9	0	SOX9
63378	0	0.491488	1	ABCA4	0	ABCA4
63380	0	0.491488	1	ABCC8	0	ABCC8
63382	0	0.491488	1	SERPINA7	0	SERPINA7
63384	0	0.491488	1	TCN2	0	TCN2
63386	0	0.491488	1	TGFBI	0	TGFBI
63388	0	0.491488	1	THBD	0	THBD
63390	0	0.491488	1	TIMP3	0	TIMP3
63392	0	0.491488	1	TNNI3	0	TNNI3
63395	0	0.491488	1	TPMT	0	TPMT
63397	0	0.491488	1	TSC1	0	TSC1
63399	0	0.491488	1	UMPS	0	UMPS
63401	0	0.491488	1	WAS	0	WAS
63403	0	0.491488	1	MID1	0	MID1
63405	0	0.491488	1	ALDH3A2	0	ALDH3A2
63407	0	0.491488	1	SLC25A20	0	SLC25A20
63409	0	0.491488	1	CHM	0	CHM
63411	0	0.491488	1	TPP1	0	TPP1
63413	0	0.491488	1	ABCC2	0	ABCC2
63415	0	0.491488	1	COL5A2	0	COL5A2
63417	0	0.491488	1	CRYAA	0	CRYAA
63419	0	0.491488	1	CSF2RB	0	CSF2RB
63421	0	0.491488	1	CTSK	0	CTSK
63423	0	0.491488	1	EGR2	0	EGR2
63425	0	0.491488	1	ERCC2	0	ERCC2
63427	0	0.491488	1	EXT2	0	EXT2
63429	0	0.491488	1	GLB1	0	GLB1
63431	0	0.491488	1	GM2A	0	GM2A
63433	0	0.491488	1	HLCS	0	HLCS
63435	0	0.491488	1	HRG	0	HRG
63437	0	0.491488	1	HSD17B4	0	HSD17B4
63439	0	0.491488	1	IFNGR1	0	IFNGR1
63441	0	0.491488	1	IL4R	0	IL4R
63443	0	0.491488	1	ITGA2B	0	ITGA2B
63445	0	0.491488	1	KRT10	0	KRT10
63447	0	0.491488	1	KRT2	0	KRT2
63449	0	0.491488	1	LTBP2	0	LTBP2
63451	0	0.491488	1	PAFAH1B1	0	PAFAH1B1
63453	0	0.491488	1	NCF2	0	NCF2
63455	0	0.491488	1	NOTCH3	0	NOTCH3
63457	0	0.491488	1	OXCT1	0	OXCT1
63459	0	0.491488	1	SLC26A4	0	SLC26A4
63461	0	0.491488	1	PECAM1	0	PECAM1
63464	0	0.491488	1	RFX5	0	RFX5
63466	0	0.491488	1	SELE	0	SELE
63468	0	0.491488	1	SOD1	0	SOD1
63470	0	0.491488	1	STK11	0	STK11
63472	0	0.491488	1	HNF1B	0	HNF1B
63474	0	0.491488	1	AK1	0	AK1
63478	0	0.491488	1	ALPL	0	ALPL
63480	0	0.491488	1	AMT	0	AMT
63482	0	0.491488	1	APP	0	APP
63484	0	0.491488	1	ARSA	0	ARSA
63486	0	0.491488	1	ATRX	0	ATRX
63489	0	0.491488	1	C1QB	0	C1QB
63491	0	0.491488	1	COL10A1	0	COL10A1
63493	0	0.491488	1	CYP11B1	0	CYP11B1
63495	0	0.491488	1	CYP21A2	0	CYP21A2
63497	0	0.491488	1	F12	0	F12
63499	0	0.491488	1	GH1	0	GH1
63501	0	0.491488	1	HBB	0	HBB
63503	0	0.491488	1	HBD	0	HBD
63505	0	0.491488	1	HEXA	0	HEXA
63507	0	0.491488	1	HOXA13	0	HOXA13
63509	0	0.491488	1	LDLR	0	LDLR
63511	0	0.491488	1	MC2R	0	MC2R
63513	0	0.491488	1	PCCB	0	PCCB
63515	0	0.491488	1	PMS1	0	PMS1
63517	0	0.491488	1	PMS2	0	PMS2
63519	0	0.491488	1	REN	0	REN
63521	0	0.491488	1	RFXAP	0	RFXAP
63523	0	0.491488	1	SFTPB	0	SFTPB
63526	0	0.491488	1	VHL	0	VHL
63528	0	0.491488	1	VWF	0	VWF
63530	0	0.491488	1	WRN	0	WRN
63532	0	0.491488	1	CRX	0	CRX
63534	0	0.491488	1	DCX	0	DCX
63536	0	0.491488	1	FCGR3A	0	FCGR3A
63538	0	0.491488	1	CD55	0	CD55
63540	0	0.491488	1	SLC11A1	0	SLC11A1
63542	0	0.491488	1	CCR5	0	CCR5
63544	0	0.491488	1	TNF	0	TNF
63546	0	0.491488	1	IGFBP2	0	IGFBP2
63548	0	0.491488	1	IGFBP5	0	IGFBP5
63550	0	0.491488	1	IL6	0	IL6
63552	0	0.491488	1	SERPINE1	0	SERPINE1
63555	0	0.491488	1	CD44	0	CD44
63558	0	0.491488	1	CD4	0	CD4
63560	0	0.491488	1	IGF1	0	IGF1
63563	0	0.491488	1	HTR2A	0	HTR2A
63565	0	0.491488	1	BDKRB2	0	BDKRB2
63567	0	0.491488	1	NOS2	0	NOS2
63569	0	0.491488	1	IL10RB	0	IL10RB
63571	0	0.491488	1	IFNAR1	0	IFNAR1
63573	0	0.491488	1	ITGAM	0	ITGAM
63575	0	0.491488	1	CXCR1	0	CXCR1
63577	0	0.491488	1	RFX2	0	RFX2
63579	0	0.491488	1	VTN	0	VTN
63581	0	0.491488	1	IL11	0	IL11
63583	0	0.491488	1	AIRE	0	AIRE
63585	0	0.491488	1	TGFB1	0	TGFB1
63587	0	0.491488	1	NAT1	0	NAT1
63591	0	0.491488	1	ACHE	0	ACHE
63593	0	0.491488	1	ADH1C	0	ADH1C
63595	0	0.491488	1	ADORA2B	0	ADORA2B
63597	0	0.491488	1	ADRA2B	0	ADRA2B
63599	0	0.491488	1	ADRA2C	0	ADRA2C
63601	0	0.491488	1	ALDH1A1	0	ALDH1A1
63604	0	0.491488	1	ALDH3B1	0	ALDH3B1
63606	0	0.491488	1	ALDH9A1	0	ALDH9A1
63608	0	0.491488	1	ALOX5	0	ALOX5
63610	0	0.491488	1	ANXA1	0	ANXA1
63612	0	0.491488	1	ATP1A1	0	ATP1A1
63614	0	0.491488	1	BDKRB1	0	BDKRB1
63616	0	0.491488	1	BLVRA	0	BLVRA
63618	0	0.491488	1	BLVRB	0	BLVRB
63620	0	0.491488	1	TSPO	0	TSPO
63622	0	0.491488	1	CACNA2D1	0	CACNA2D1
63624	0	0.491488	1	CD3D	0	CD3D
63626	0	0.491488	1	CD3E	0	CD3E
63628	0	0.491488	1	CHRM4	0	CHRM4
63630	0	0.491488	1	CHRNA4	0	CHRNA4
63632	0	0.491488	1	CHRND	0	CHRND
63634	0	0.491488	1	COMT	0	COMT
63636	0	0.491488	1	CRAT	0	CRAT
63638	0	0.491488	1	CRH	0	CRH
63640	0	0.491488	1	CSF1	0	CSF1
63642	0	0.491488	1	CSF2	0	CSF2
63645	0	0.491488	1	CYP2B6	0	CYP2B6
63647	0	0.491488	1	CYP2E1	0	CYP2E1
63649	0	0.491488	1	CYP3A5	0	CYP3A5
63651	0	0.491488	1	CYP4A11	0	CYP4A11
63653	0	0.491488	1	CYP4B1	0	CYP4B1
63655	0	0.491488	1	CYP11A1	0	CYP11A1
63657	0	0.491488	1	CYP27A1	0	CYP27A1
63659	0	0.491488	1	CYP51A1	0	CYP51A1
63661	0	0.491488	1	DCK	0	DCK
63664	0	0.491488	1	DHFR	0	DHFR
63666	0	0.491488	1	FGF1	0	FGF1
63669	0	0.491488	1	FKBP1A	0	FKBP1A
63672	0	0.491488	1	FOLR2	0	FOLR2
63674	0	0.491488	1	FOLR3	0	FOLR3
63676	0	0.491488	1	GAST	0	GAST
63678	0	0.491488	1	GABRD	0	GABRD
63682	0	0.491488	1	GAS6	0	GAS6
63684	0	0.491488	1	GGCX	0	GGCX
63686	0	0.491488	1	GNRH1	0	GNRH1
63688	0	0.491488	1	GRIA1	0	GRIA1
63690	0	0.491488	1	GRIK3	0	GRIK3
63694	0	0.491488	1	GRIN2C	0	GRIN2C
63697	0	0.491488	1	GRIN2D	0	GRIN2D
63699	0	0.491488	1	GRM3	0	GRM3
63701	0	0.491488	1	GRM7	0	GRM7
63703	0	0.491488	1	GSTM3	0	GSTM3
63705	0	0.491488	1	GSTM5	0	GSTM5
63707	0	0.491488	1	GSTP1	0	GSTP1
63709	0	0.491488	1	GSTT1	0	GSTT1
63711	0	0.491488	1	GSTT2	0	GSTT2
63713	0	0.491488	1	GUCY1A3	0	GUCY1A3
63715	0	0.491488	1	HMGCR	0	HMGCR
63717	0	0.491488	1	HPGD	0	HPGD
63719	0	0.491488	1	HTR1B	0	HTR1B
63721	0	0.491488	1	HTR6	0	HTR6
63723	0	0.491488	1	ICAM2	0	ICAM2
63725	0	0.491488	1	IGF1R	0	IGF1R
63727	0	0.491488	1	IGF2R	0	IGF2R
63729	0	0.491488	1	IL1R1	0	IL1R1
63732	0	0.491488	1	IMPDH1	0	IMPDH1
63734	0	0.491488	1	IMPDH2	0	IMPDH2
63736	0	0.491488	1	ITGAX	0	ITGAX
63738	0	0.491488	1	ITGB7	0	ITGB7
63740	0	0.491488	1	KCNJ5	0	KCNJ5
63742	0	0.491488	1	KLKB1	0	KLKB1
63744	0	0.491488	1	LHB	0	LHB
63746	0	0.491488	1	KITLG	0	KITLG
63748	0	0.491488	1	MGP	0	MGP
63750	0	0.491488	1	NPR1	0	NPR1
63752	0	0.491488	1	NPY2R	0	NPY2R
63754	0	0.491488	1	OXT	0	OXT
63756	0	0.491488	1	P4HB	0	P4HB
63759	0	0.491488	1	PAM	0	PAM
63761	0	0.491488	1	PDE3B	0	PDE3B
63763	0	0.491488	1	PDE4C	0	PDE4C
63765	0	0.491488	1	PDHB	0	PDHB
63767	0	0.491488	1	PLA2G1B	0	PLA2G1B
63769	0	0.491488	1	PLAT	0	PLAT
63772	0	0.491488	1	PPIC	0	PPIC
63774	0	0.491488	1	PPP3CA	0	PPP3CA
63776	0	0.491488	1	PRIM1	0	PRIM1
63778	0	0.491488	1	PRIM2	0	PRIM2
63781	0	0.491488	1	PRRG1	0	PRRG1
63783	0	0.491488	1	PTAFR	0	PTAFR
63785	0	0.491488	1	PTGER2	0	PTGER2
63787	0	0.491488	1	PTGER4	0	PTGER4
63789	0	0.491488	1	PTGIS	0	PTGIS
63791	0	0.491488	1	PTGS2	0	PTGS2
63793	0	0.491488	1	RARB	0	RARB
63796	0	0.491488	1	RPL5	0	RPL5
63800	0	0.491488	1	RPL7	0	RPL7
63804	0	0.491488	1	RPL7A	0	RPL7A
63806	0	0.491488	1	RPL8	0	RPL8
63808	0	0.491488	1	RPL11	0	RPL11
63810	0	0.491488	1	RPL23	0	RPL23
63813	0	0.491488	1	RPL18	0	RPL18
63815	0	0.491488	1	RPL18A	0	RPL18A
63817	0	0.491488	1	RPL19	0	RPL19
63819	0	0.491488	1	RPL21	0	RPL21
63827	0	0.491488	1	RPL22	0	RPL22
63829	0	0.491488	1	RPL23A	0	RPL23A
63834	0	0.491488	1	RPL17	0	RPL17
63837	0	0.491488	1	RPL24	0	RPL24
63839	0	0.491488	1	RPL26	0	RPL26
63841	0	0.491488	1	RPL27	0	RPL27
63843	0	0.491488	1	RPL30	0	RPL30
63845	0	0.491488	1	RPL28	0	RPL28
63847	0	0.491488	1	RPL29	0	RPL29
63852	0	0.491488	1	RPL31	0	RPL31
63854	0	0.491488	1	RPL35A	0	RPL35A
63856	0	0.491488	1	RPL37A	0	RPL37A
63859	0	0.491488	1	RPL38	0	RPL38
63861	0	0.491488	1	RPL39	0	RPL39
63864	0	0.491488	1	RPL36AL	0	RPL36AL
63866	0	0.491488	1	FNDC9	0	FNDC9
63868	0	0.491488	1	ATP2B4	0	ATP2B4
63870	0	0.491488	1	NCCRP1	0	NCCRP1
63872	0	0.491488	1	ZNF429	0	ZNF429
63874	0	0.491488	1	SMAD5	0	SMAD5
63876	0	0.491488	1	STX16	0	STX16
63878	0	0.491488	1	LSS	0	LSS
63880	0	0.491488	1	SLC35E4	0	SLC35E4
63882	0	0.491488	1	KRTAP5-5	0	KRTAP5-5
63885	0	0.491488	1	UBE2W	0	UBE2W
63888	0	0.491488	1	PTER	0	PTER
63890	0	0.491488	1	ATP2C1	0	ATP2C1
63892	0	0.491488	1	SNCB	0	SNCB
63894	0	0.491488	1	TM6SF2	0	TM6SF2
63896	0	0.491488	1	GRB10	0	GRB10
63899	0	0.491488	1	GALK2	0	GALK2
63901	0	0.491488	1	GDF6	0	GDF6
63903	0	0.491488	1	GGA1	0	GGA1
63905	0	0.491488	1	OR2Y1	0	OR2Y1
63907	0	0.491488	1	ETFRF1	0	ETFRF1
63909	0	0.491488	1	SPOPL	0	SPOPL
63911	0	0.491488	1	CYP27C1	0	CYP27C1
63913	0	0.491488	1	LCN9	0	LCN9
63915	0	0.491488	1	MED11	0	MED11
63917	0	0.491488	1	IL17REL	0	IL17REL
63919	0	0.491488	1	DENND6B	0	DENND6B
63921	0	0.491488	1	OR2A42	0	OR2A42
63923	0	0.491488	1	PIM3	0	PIM3
63925	0	0.491488	1	RUNX1	0	RUNX1
63928	0	0.491488	1	OR4E2	0	OR4E2
63930	0	0.491488	1	OR52N1	0	OR52N1
63932	0	0.491488	1	OR52N5	0	OR52N5
63934	0	0.491488	1	OR5C1	0	OR5C1
63937	0	0.491488	1	OR5D18	0	OR5D18
63939	0	0.491488	1	PLEKHA1	0	PLEKHA1
63942	0	0.491488	1	USP16	0	USP16
63944	0	0.491488	1	NT5C3A	0	NT5C3A
63947	0	0.491488	1	C4B	0	C4B
63949	0	0.491488	1	ATP5G2	0	ATP5G2
63951	0	0.491488	1	HN1	0	HN1
63953	0	0.491488	1	DEFB108B	0	DEFB108B
63955	0	0.491488	1	ANAPC11	0	ANAPC11
63957	0	0.491488	1	ARL6IP4	0	ARL6IP4
63959	0	0.491488	1	ATP5G3	0	ATP5G3
63961	0	0.491488	1	CAPRIN2	0	CAPRIN2
63963	0	0.491488	1	ZFYVE27	0	ZFYVE27
63965	0	0.491488	1	WLS	0	WLS
63967	0	0.491488	1	GOLGA7	0	GOLGA7
63970	0	0.491488	1	PRY2	0	PRY2
63973	0	0.491488	1	DNAJB12	0	DNAJB12
63975	0	0.491488	1	PDE4DIP	0	PDE4DIP
63977	0	0.491488	1	ZNF787	0	ZNF787
63979	0	0.491488	1	INPP5J	0	INPP5J
63981	0	0.491488	1	BTBD7	0	BTBD7
63983	0	0.491488	1	FCRLB	0	FCRLB
63985	0	0.491488	1	GPATCH8	0	GPATCH8
63987	0	0.491488	1	GPR139	0	GPR139
63989	0	0.491488	1	TWISTNB	0	TWISTNB
63991	0	0.491488	1	RPLP1	0	RPLP1
63993	0	0.491488	1	SMAD2	0	SMAD2
63995	0	0.491488	1	C11orf49	0	C11orf49
63997	0	0.491488	1	LEPR	0	LEPR
64000	0	0.491488	1	HMGXB4	0	HMGXB4
64002	0	0.491488	1	TMEM200B	0	TMEM200B
64004	0	0.491488	1	PDE1A	0	PDE1A
64006	0	0.491488	1	LY6G6F	0	LY6G6F
64008	0	0.491488	1	RREB1	0	RREB1
64010	0	0.491488	1	ATP5J	0	ATP5J
64012	0	0.491488	1	ATP5J2	0	ATP5J2
64014	0	0.491488	1	ERLIN2	0	ERLIN2
64016	0	0.491488	1	TARP	0	TARP
64018	0	0.491488	1	ATP5S	0	ATP5S
64020	0	0.491488	1	DUPD1	0	DUPD1
64022	0	0.491488	1	EVI2A	0	EVI2A
64024	0	0.491488	1	RPLP2	0	RPLP2
64026	0	0.491488	1	FBLN2	0	FBLN2
64028	0	0.491488	1	DYRK3	0	DYRK3
64030	0	0.491488	1	GPRASP2	0	GPRASP2
64032	0	0.491488	1	GRK4	0	GRK4
64034	0	0.491488	1	GRK6	0	GRK6
64036	0	0.491488	1	TUSC1	0	TUSC1
64039	0	0.491488	1	QSOX1	0	QSOX1
64041	0	0.491488	1	OR4F4	0	OR4F4
64043	0	0.491488	1	ZNF740	0	ZNF740
64045	0	0.491488	1	RTP2	0	RTP2
64047	0	0.491488	1	ACP7	0	ACP7
64049	0	0.491488	1	RNASEK	0	RNASEK
64051	0	0.491488	1	STPG3	0	STPG3
64054	0	0.491488	1	CLEC2D	0	CLEC2D
64056	0	0.491488	1	PLA2G6	0	PLA2G6
64058	0	0.491488	1	METRNL	0	METRNL
64060	0	0.491488	1	ITGA11	0	ITGA11
64062	0	0.491488	1	OR1B1	0	OR1B1
64064	0	0.491488	1	OR1J4	0	OR1J4
64066	0	0.491488	1	OR1L6	0	OR1L6
64068	0	0.491488	1	OR1N2	0	OR1N2
64070	0	0.491488	1	OR1S2	0	OR1S2
64072	0	0.491488	1	OR10G8	0	OR10G8
64074	0	0.491488	1	OR10J5	0	OR10J5
64076	0	0.491488	1	OR13H1	0	OR13H1
64078	0	0.491488	1	OR13J1	0	OR13J1
64080	0	0.491488	1	OR2AG2	0	OR2AG2
64082	0	0.491488	1	OR4D6	0	OR4D6
64084	0	0.491488	1	OR4S1	0	OR4S1
64086	0	0.491488	1	OR5D14	0	OR5D14
64088	0	0.491488	1	OR5K1	0	OR5K1
64090	0	0.491488	1	OR51A7	0	OR51A7
64092	0	0.491488	1	OR51F1	0	OR51F1
64094	0	0.491488	1	OR51S1	0	OR51S1
64096	0	0.491488	1	OR51T1	0	OR51T1
64098	0	0.491488	1	OR52B6	0	OR52B6
64100	0	0.491488	1	OR52N2	0	OR52N2
64102	0	0.491488	1	OR52R1	0	OR52R1
64104	0	0.491488	1	OR6Y1	0	OR6Y1
64106	0	0.491488	1	OR8A1	0	OR8A1
64108	0	0.491488	1	OR8J1	0	OR8J1
64110	0	0.491488	1	TMEM198	0	TMEM198
64112	0	0.491488	1	FRG2	0	FRG2
64114	0	0.491488	1	OR4F29	0	OR4F29
64116	0	0.491488	1	OR1L1	0	OR1L1
64118	0	0.491488	1	OR4N4	0	OR4N4
64120	0	0.491488	1	OR9G4	0	OR9G4
64122	0	0.491488	1	SREBF1	0	SREBF1
64125	0	0.491488	1	OR5H1	0	OR5H1
64127	0	0.491488	1	RGS10	0	RGS10
64129	0	0.491488	1	GPNMB	0	GPNMB
64131	0	0.491488	1	AK4	0	AK4
64134	0	0.491488	1	PRR13	0	PRR13
64136	0	0.491488	1	MTIF2	0	MTIF2
64138	0	0.491488	1	ACTR2	0	ACTR2
64143	0	0.491488	1	YPEL2	0	YPEL2
64145	0	0.491488	1	KRTAP5-11	0	KRTAP5-11
64147	0	0.491488	1	HIST2H3A	0	HIST2H3A
64149	0	0.491488	1	OR10G2	0	OR10G2
64151	0	0.491488	1	OR5H6	0	OR5H6
64153	0	0.491488	1	OR2A2	0	OR2A2
64155	0	0.491488	1	OR4K5	0	OR4K5
64157	0	0.491488	1	CACNA2D2	0	CACNA2D2
64159	0	0.491488	1	OR5K3	0	OR5K3
64161	0	0.491488	1	SF3B1	0	SF3B1
64163	0	0.491488	1	EDA	0	EDA
64165	0	0.491488	1	SUMO1	0	SUMO1
64167	0	0.491488	1	OR6B2	0	OR6B2
64169	0	0.491488	1	ATP8B2	0	ATP8B2
64171	0	0.491488	1	RYK	0	RYK
64173	0	0.491488	1	IP6K2	0	IP6K2
64175	0	0.491488	1	RPS3A	0	RPS3A
64179	0	0.491488	1	HMCES	0	HMCES
64181	0	0.491488	1	RBMY1B	0	RBMY1B
64183	0	0.491488	1	MAPKAP1	0	MAPKAP1
64186	0	0.491488	1	WDR33	0	WDR33
64189	0	0.491488	1	ARHGAP17	0	ARHGAP17
64191	0	0.491488	1	GTDC1	0	GTDC1
64193	0	0.491488	1	SLC25A25	0	SLC25A25
64195	0	0.491488	1	SPIN2B	0	SPIN2B
64197	0	0.491488	1	EPHA8	0	EPHA8
64199	0	0.491488	1	SDC1	0	SDC1
64201	0	0.491488	1	GOSR1	0	GOSR1
64203	0	0.491488	1	ATN1	0	ATN1
64205	0	0.491488	1	ALG8	0	ALG8
64207	0	0.491488	1	RPL32	0	RPL32
64209	0	0.491488	1	C8orf48	0	C8orf48
64211	0	0.491488	1	ZNF484	0	ZNF484
64213	0	0.491488	1	LKAAEAR1	0	LKAAEAR1
64215	0	0.491488	1	IGIP	0	IGIP
64217	0	0.491488	1	SPOP	0	SPOP
64219	0	0.491488	1	ARHGAP25	0	ARHGAP25
64221	0	0.491488	1	IFRD1	0	IFRD1
64223	0	0.491488	1	BRWD1	0	BRWD1
64225	0	0.491488	1	ZNF599	0	ZNF599
64227	0	0.491488	1	KLHDC9	0	KLHDC9
64229	0	0.491488	1	SETD4	0	SETD4
64231	0	0.491488	1	SFI1	0	SFI1
64233	0	0.491488	1	TRPM3	0	TRPM3
64235	0	0.491488	1	F8A2	0	F8A2
64237	0	0.491488	1	NKAPL	0	NKAPL
64239	0	0.491488	1	PPP1R27	0	PPP1R27
64241	0	0.491488	1	C1QTNF9B	0	C1QTNF9B
64243	0	0.491488	1	SHISA2	0	SHISA2
64245	0	0.491488	1	CDHR4	0	CDHR4
64247	0	0.491488	1	CSDE1	0	CSDE1
64249	0	0.491488	1	SS18	0	SS18
64251	0	0.491488	1	IGFBPL1	0	IGFBPL1
64253	0	0.491488	1	BUB3	0	BUB3
64255	0	0.491488	1	CEPT1	0	CEPT1
64257	0	0.491488	1	RPS4Y1	0	RPS4Y1
64259	0	0.491488	1	OPTN	0	OPTN
64261	0	0.491488	1	COA5	0	COA5
64264	0	0.491488	1	AMY1C	0	AMY1C
64266	0	0.491488	1	UACA	0	UACA
64268	0	0.491488	1	MOG	0	MOG
64270	0	0.491488	1	SCX	0	SCX
64272	0	0.491488	1	CISD2	0	CISD2
64274	0	0.491488	1	CGGBP1	0	CGGBP1
64276	0	0.491488	1	CCDC73	0	CCDC73
64278	0	0.491488	1	CTDSPL	0	CTDSPL
64280	0	0.491488	1	C4orf46	0	C4orf46
64283	0	0.491488	1	LAMTOR4	0	LAMTOR4
64285	0	0.491488	1	GPX8	0	GPX8
64288	0	0.491488	1	C14orf180	0	C14orf180
64291	0	0.491488	1	2020-09-02	0	2020-09-02
64294	0	0.491488	1	ENAH	0	ENAH
64297	0	0.491488	1	TMEM64	0	TMEM64
64299	0	0.491488	1	MXRA7	0	MXRA7
64303	0	0.491488	1	LGMN	0	LGMN
64305	0	0.491488	1	SLC7A2	0	SLC7A2
64307	0	0.491488	1	CXCR4	0	CXCR4
64309	0	0.491488	1	USP20	0	USP20
64311	0	0.491488	1	TPST2	0	TPST2
64313	0	0.491488	1	TCOF1	0	TCOF1
64316	0	0.491488	1	CST9	0	CST9
64318	0	0.491488	1	EML1	0	EML1
64320	0	0.491488	1	RBPMS	0	RBPMS
64322	0	0.491488	1	SULT1C3	0	SULT1C3
64324	0	0.491488	1	CTAGE15	0	CTAGE15
64326	0	0.491488	1	SPDYC	0	SPDYC
64328	0	0.491488	1	SPDYA	0	SPDYA
64330	0	0.491488	1	FAT3	0	FAT3
64332	0	0.491488	1	CUL4A	0	CUL4A
64334	0	0.491488	1	STK16	0	STK16
64336	0	0.491488	1	CKAP5	0	CKAP5
64338	0	0.491488	1	RPS5	0	RPS5
64340	0	0.491488	1	SH3D19	0	SH3D19
64342	0	0.491488	1	CLSTN1	0	CLSTN1
64344	0	0.491488	1	SMPDL3B	0	SMPDL3B
64346	0	0.491488	1	SPANXN3	0	SPANXN3
64348	0	0.491488	1	NUTM2D	0	NUTM2D
64350	0	0.491488	1	LBX2	0	LBX2
64352	0	0.491488	1	ZCCHC11	0	ZCCHC11
64354	0	0.491488	1	USF3	0	USF3
64356	0	0.491488	1	TMEM230	0	TMEM230
64359	0	0.491488	1	SSBP3	0	SSBP3
64362	0	0.491488	1	C20orf194	0	C20orf194
64364	0	0.491488	1	FAM168B	0	FAM168B
64366	0	0.491488	1	RIPPLY2	0	RIPPLY2
64368	0	0.491488	1	RPS6	0	RPS6
64370	0	0.491488	1	ARHGAP28	0	ARHGAP28
64372	0	0.491488	1	LRRC38	0	LRRC38
64374	0	0.491488	1	NRG3	0	NRG3
64376	0	0.491488	1	ZNF766	0	ZNF766
64378	0	0.491488	1	TTC7B	0	TTC7B
64380	0	0.491488	1	PIK3R6	0	PIK3R6
64382	0	0.491488	1	RNF187	0	RNF187
64384	0	0.491488	1	SPIN3	0	SPIN3
64386	0	0.491488	1	FAM83B	0	FAM83B
64388	0	0.491488	1	C16orf91	0	C16orf91
64390	0	0.491488	1	ZNF780A	0	ZNF780A
64392	0	0.491488	1	ZC3H12B	0	ZC3H12B
64394	0	0.491488	1	RSPH4A	0	RSPH4A
64396	0	0.491488	1	SERP2	0	SERP2
64398	0	0.491488	1	HACD4	0	HACD4
64400	0	0.491488	1	GOLGA7B	0	GOLGA7B
64403	0	0.491488	1	BCL2L15	0	BCL2L15
64406	0	0.491488	1	RAP1A	0	RAP1A
64408	0	0.491488	1	SAMD13	0	SAMD13
64410	0	0.491488	1	C1orf189	0	C1orf189
64412	0	0.491488	1	MYBPHL	0	MYBPHL
64414	0	0.491488	1	RPS7	0	RPS7
64417	0	0.491488	1	PDLIM5	0	PDLIM5
64419	0	0.491488	1	FYTTD1	0	FYTTD1
64421	0	0.491488	1	DSTN	0	DSTN
64423	0	0.491488	1	2020-09-07	0	2020-09-07
64425	0	0.491488	1	TRAPPC2	0	TRAPPC2
64427	0	0.491488	1	PCGF6	0	PCGF6
64429	0	0.491488	1	CHCHD7	0	CHCHD7
64432	0	0.491488	1	NAA30	0	NAA30
64434	0	0.491488	1	HNRNPA1L2	0	HNRNPA1L2
64439	0	0.491488	1	MSL1	0	MSL1
64441	0	0.491488	1	PRAMEF7	0	PRAMEF7
64443	0	0.491488	1	CRLF2	0	CRLF2
64446	0	0.491488	1	ANO9	0	ANO9
64448	0	0.491488	1	MDK	0	MDK
64450	0	0.491488	1	NTRK3	0	NTRK3
64452	0	0.491488	1	AKTIP	0	AKTIP
64455	0	0.491488	1	KRTAP5-7	0	KRTAP5-7
64457	0	0.491488	1	SPRN	0	SPRN
64459	0	0.491488	1	GOSR2	0	GOSR2
64461	0	0.491488	1	FECH	0	FECH
64463	0	0.491488	1	CTBP1	0	CTBP1
64465	0	0.491488	1	IL32	0	IL32
64468	0	0.491488	1	ARGFX	0	ARGFX
64470	0	0.491488	1	KRTAP5-4	0	KRTAP5-4
64473	0	0.491488	1	ZNF763	0	ZNF763
64475	0	0.491488	1	NHLRC3	0	NHLRC3
64477	0	0.491488	1	SLC25A53	0	SLC25A53
64479	0	0.491488	1	ZNF260	0	ZNF260
64481	0	0.491488	1	ADAL	0	ADAL
64483	0	0.491488	1	COA6	0	COA6
64485	0	0.491488	1	SNX30	0	SNX30
64488	0	0.491488	1	RPS9	0	RPS9
64491	0	0.491488	1	LSP1	0	LSP1
64493	0	0.491488	1	ZNF789	0	ZNF789
64495	0	0.491488	1	OR2G6	0	OR2G6
64498	0	0.491488	1	SEH1L	0	SEH1L
64500	0	0.491488	1	FXR1	0	FXR1
64503	0	0.491488	1	LURAP1	0	LURAP1
64505	0	0.491488	1	ALG10B	0	ALG10B
64507	0	0.491488	1	PPP1R42	0	PPP1R42
64509	0	0.491488	1	NHSL2	0	NHSL2
64511	0	0.491488	1	DCAF12L2	0	DCAF12L2
64513	0	0.491488	1	AADACL4	0	AADACL4
64515	0	0.491488	1	HNRNPCL1	0	HNRNPCL1
64517	0	0.491488	1	TCTEX1D4	0	TCTEX1D4
64519	0	0.491488	1	PRR25	0	PRR25
64522	0	0.491488	1	C2orf68	0	C2orf68
64524	0	0.491488	1	PRR23B	0	PRR23B
64526	0	0.491488	1	LRRC26	0	LRRC26
64529	0	0.491488	1	FIGNL2	0	FIGNL2
64531	0	0.491488	1	LDLRAD2	0	LDLRAD2
64533	0	0.491488	1	SMCO3	0	SMCO3
64535	0	0.491488	1	EIF2AK4	0	EIF2AK4
64537	0	0.491488	1	CARMIL2	0	CARMIL2
64539	0	0.491488	1	EXOC7	0	EXOC7
64541	0	0.491488	1	STAP2	0	STAP2
64543	0	0.491488	1	C8orf58	0	C8orf58
64545	0	0.491488	1	CXorf40B	0	CXorf40B
64547	0	0.491488	1	RPS10	0	RPS10
64552	0	0.491488	1	ANXA2R	0	ANXA2R
64554	0	0.491488	1	DCUN1D2	0	DCUN1D2
64556	0	0.491488	1	SPRR2G	0	SPRR2G
64558	0	0.491488	1	ODF3B	0	ODF3B
64561	0	0.491488	1	OCIAD2	0	OCIAD2
64563	0	0.491488	1	EMC6	0	EMC6
64565	0	0.491488	1	FBXO44	0	FBXO44
64567	0	0.491488	1	DDR2	0	DDR2
64569	0	0.491488	1	FAM96A	0	FAM96A
64573	0	0.491488	1	GLTPD2	0	GLTPD2
64575	0	0.491488	1	RPS11	0	RPS11
64577	0	0.491488	1	LLGL2	0	LLGL2
64579	0	0.491488	1	BAG5	0	BAG5
64581	0	0.491488	1	ALG1L	0	ALG1L
64583	0	0.491488	1	HDAC5	0	HDAC5
64585	0	0.491488	1	UFSP1	0	UFSP1
64588	0	0.491488	1	PAPSS2	0	PAPSS2
64590	0	0.491488	1	DNAJC25	0	DNAJC25
64592	0	0.491488	1	RAE1	0	RAE1
64594	0	0.491488	1	TAF9	0	TAF9
64596	0	0.491488	1	RPS13	0	RPS13
64598	0	0.491488	1	RFFL	0	RFFL
64600	0	0.491488	1	TMCC1	0	TMCC1
64602	0	0.491488	1	LAMB3	0	LAMB3
64604	0	0.491488	1	KCNK2	0	KCNK2
64606	0	0.491488	1	INPP5D	0	INPP5D
64608	0	0.491488	1	CYB561	0	CYB561
64610	0	0.491488	1	DAPL1	0	DAPL1
64613	0	0.491488	1	C14orf28	0	C14orf28
64615	0	0.491488	1	ZHX1	0	ZHX1
64617	0	0.491488	1	C2orf76	0	C2orf76
64620	0	0.491488	1	HSP90AA1	0	HSP90AA1
64623	0	0.491488	1	TMEM30B	0	TMEM30B
64625	0	0.491488	1	ATP6AP1L	0	ATP6AP1L
64627	0	0.491488	1	RAB28	0	RAB28
64629	0	0.491488	1	VMA21	0	VMA21
64631	0	0.491488	1	H2AFB2	0	H2AFB2
64634	0	0.491488	1	ACTBL2	0	ACTBL2
64636	0	0.491488	1	SH3PXD2B	0	SH3PXD2B
64638	0	0.491488	1	GNG10	0	GNG10
64641	0	0.491488	1	RPS15	0	RPS15
64643	0	0.491488	1	BRCC3	0	BRCC3
64645	0	0.491488	1	VLDLR	0	VLDLR
64647	0	0.491488	1	NTRK2	0	NTRK2
64649	0	0.491488	1	SERBP1	0	SERBP1
64651	0	0.491488	1	BTBD11	0	BTBD11
64653	0	0.491488	1	NR3C1	0	NR3C1
64656	0	0.491488	1	GCOM1	0	GCOM1
64658	0	0.491488	1	MYZAP	0	MYZAP
64660	0	0.491488	1	FAHD1	0	FAHD1
64662	0	0.491488	1	NAE1	0	NAE1
64664	0	0.491488	1	RPS15A	0	RPS15A
64669	0	0.491488	1	RPS16	0	RPS16
64671	0	0.491488	1	PUM1	0	PUM1
64674	0	0.491488	1	MYADM	0	MYADM
64677	0	0.491488	1	RPS17	0	RPS17
64679	0	0.491488	1	RPS19	0	RPS19
64682	0	0.491488	1	RPS20	0	RPS20
64684	0	0.491488	1	ZNF805	0	ZNF805
64686	0	0.491488	1	IQCB1	0	IQCB1
64688	0	0.491488	1	ABCC5	0	ABCC5
64691	0	0.491488	1	GLRA4	0	GLRA4
64693	0	0.491488	1	RGPD1	0	RGPD1
64695	0	0.491488	1	SOD2	0	SOD2
64697	0	0.491488	1	HES3	0	HES3
64699	0	0.491488	1	HIST2H2BF	0	HIST2H2BF
64701	0	0.491488	1	NRP1	0	NRP1
64703	0	0.491488	1	ASPDH	0	ASPDH
64705	0	0.491488	1	RPL6	0	RPL6
64710	0	0.491488	1	LIN52	0	LIN52
64712	0	0.491488	1	ACTL10	0	ACTL10
64714	0	0.491488	1	CD276	0	CD276
64717	0	0.491488	1	RARA	0	RARA
64720	0	0.491488	1	RNASE12	0	RNASE12
64723	0	0.491488	1	ZNF197	0	ZNF197
64725	0	0.491488	1	SPTB	0	SPTB
64729	0	0.491488	1	RPL9	0	RPL9
64731	0	0.491488	1	YIPF5	0	YIPF5
64733	0	0.491488	1	FNBP1L	0	FNBP1L
64735	0	0.491488	1	RPS23	0	RPS23
64737	0	0.491488	1	RPS14	0	RPS14
64739	0	0.491488	1	CELF2	0	CELF2
64742	0	0.491488	1	ABCF1	0	ABCF1
64744	0	0.491488	1	MBP	0	MBP
64747	0	0.491488	1	CSNK1A1	0	CSNK1A1
64749	0	0.491488	1	CD34	0	CD34
64751	0	0.491488	1	CD74	0	CD74
64753	0	0.491488	1	CES1	0	CES1
64755	0	0.491488	1	CHI3L2	0	CHI3L2
64757	0	0.491488	1	CTRB2	0	CTRB2
64759	0	0.491488	1	U2AF1	0	U2AF1
64761	0	0.491488	1	KPRP	0	KPRP
64763	0	0.491488	1	TSPAN4	0	TSPAN4
64766	0	0.491488	1	DUT	0	DUT
64768	0	0.491488	1	TPD52	0	TPD52
64770	0	0.491488	1	RAB12	0	RAB12
64772	0	0.491488	1	ANO6	0	ANO6
64774	0	0.491488	1	VEGFA	0	VEGFA
64777	0	0.491488	1	AMPD3	0	AMPD3
64779	0	0.491488	1	SPAG16	0	SPAG16
64781	0	0.491488	1	NDEL1	0	NDEL1
64783	0	0.491488	1	ARFIP1	0	ARFIP1
64785	0	0.491488	1	ARRDC2	0	ARRDC2
64787	0	0.491488	1	ABHD17B	0	ABHD17B
64789	0	0.491488	1	RPS24	0	RPS24
64791	0	0.491488	1	RPS25	0	RPS25
64793	0	0.491488	1	RPS26	0	RPS26
64795	0	0.491488	1	SLC35F1	0	SLC35F1
64797	0	0.491488	1	KCTD21	0	KCTD21
64799	0	0.491488	1	FBXO43	0	FBXO43
64801	0	0.491488	1	C6orf120	0	C6orf120
64803	0	0.491488	1	CIB4	0	CIB4
64805	0	0.491488	1	AHDC1	0	AHDC1
64807	0	0.491488	1	C2orf71	0	C2orf71
64809	0	0.491488	1	PLEKHG1	0	PLEKHG1
64811	0	0.491488	1	CPTP	0	CPTP
64815	0	0.491488	1	PGAM4	0	PGAM4
64817	0	0.491488	1	CDNF	0	CDNF
64819	0	0.491488	1	ZNF16	0	ZNF16
64821	0	0.491488	1	SLC10A7	0	SLC10A7
64823	0	0.491488	1	RPS27	0	RPS27
64825	0	0.491488	1	RPS29	0	RPS29
64827	0	0.491488	1	AP2B1	0	AP2B1
64829	0	0.491488	1	AP1G1	0	AP1G1
64831	0	0.491488	1	OPN4	0	OPN4
64833	0	0.491488	1	SUN3	0	SUN3
64835	0	0.491488	1	ARHGAP5	0	ARHGAP5
64837	0	0.491488	1	RPS28	0	RPS28
64840	0	0.491488	1	COX19	0	COX19
64842	0	0.491488	1	SPDYE2	0	SPDYE2
64845	0	0.491488	1	ZNF451	0	ZNF451
64847	0	0.491488	1	CYB5RL	0	CYB5RL
64849	0	0.491488	1	RUNX3	0	RUNX3
64851	0	0.491488	1	SRSF7	0	SRSF7
64853	0	0.491488	1	PLAA	0	PLAA
64855	0	0.491488	1	LRRC17	0	LRRC17
64857	0	0.491488	1	RBFOX2	0	RBFOX2
64859	0	0.491488	1	ERGIC1	0	ERGIC1
64861	0	0.491488	1	TRMT11	0	TRMT11
64863	0	0.491488	1	MCUR1	0	MCUR1
64866	0	0.491488	1	NABP1	0	NABP1
64868	0	0.491488	1	DHRS12	0	DHRS12
64870	0	0.491488	1	ATAT1	0	ATAT1
64872	0	0.491488	1	DNAJB14	0	DNAJB14
64874	0	0.491488	1	DDX59	0	DDX59
64876	0	0.491488	1	MRI1	0	MRI1
64878	0	0.491488	1	FDX1L	0	FDX1L
64880	0	0.491488	1	IZUMO4	0	IZUMO4
64882	0	0.491488	1	CCDC78	0	CCDC78
64884	0	0.491488	1	MANEAL	0	MANEAL
64886	0	0.491488	1	C12orf40	0	C12orf40
64888	0	0.491488	1	TIPRL	0	TIPRL
64891	0	0.491488	1	PHKB	0	PHKB
64893	0	0.491488	1	CPT1A	0	CPT1A
64895	0	0.491488	1	INSC	0	INSC
64900	0	0.491488	1	MMP28	0	MMP28
64902	0	0.491488	1	NR2C1	0	NR2C1
64904	0	0.491488	1	UBE2V1	0	UBE2V1
64907	0	0.491488	1	ZNF207	0	ZNF207
64909	0	0.491488	1	STK24	0	STK24
64912	0	0.491488	1	MINOS1	0	MINOS1
64914	0	0.491488	1	ZNF226	0	ZNF226
64916	0	0.491488	1	PLGLB1	0	PLGLB1
64919	0	0.491488	1	RAB41	0	RAB41
64921	0	0.491488	1	USP48	0	USP48
64923	0	0.491488	1	RRM1	0	RRM1
64925	0	0.491488	1	DEFB136	0	DEFB136
64927	0	0.491488	1	TMEM259	0	TMEM259
64929	0	0.491488	1	GPR155	0	GPR155
64932	0	0.491488	1	C17orf62	0	C17orf62
64934	0	0.491488	1	NLRP1	0	NLRP1
64936	0	0.491488	1	PAIP2	0	PAIP2
64938	0	0.491488	1	SAR1B	0	SAR1B
64940	0	0.491488	1	BABAM1	0	BABAM1
64942	0	0.491488	1	SPECC1	0	SPECC1
64944	0	0.491488	1	PPM1B	0	PPM1B
64947	0	0.491488	1	DYX1C1	0	DYX1C1
64949	0	0.491488	1	PHF12	0	PHF12
64951	0	0.491488	1	DUSP28	0	DUSP28
64953	0	0.491488	1	MTUS2	0	MTUS2
64955	0	0.491488	1	LY9	0	LY9
64957	0	0.491488	1	DCLRE1C	0	DCLRE1C
64959	0	0.491488	1	TIAL1	0	TIAL1
64961	0	0.491488	1	CALCA	0	CALCA
64964	0	0.491488	1	ITPRIPL2	0	ITPRIPL2
64966	0	0.491488	1	FAM134B	0	FAM134B
64968	0	0.491488	1	SORBS1	0	SORBS1
64970	0	0.491488	1	C18orf32	0	C18orf32
64972	0	0.491488	1	FAM102A	0	FAM102A
64974	0	0.491488	1	RPL41	0	RPL41
64976	0	0.491488	1	HHLA3	0	HHLA3
64978	0	0.491488	1	AGAP1	0	AGAP1
64980	0	0.491488	1	CYS1	0	CYS1
64982	0	0.491488	1	ACOT1	0	ACOT1
64984	0	0.491488	1	ACOT9	0	ACOT9
64986	0	0.491488	1	MAJIN	0	MAJIN
64988	0	0.491488	1	GGPS1	0	GGPS1
64990	0	0.491488	1	EIF3B	0	EIF3B
64992	0	0.491488	1	CNGA4	0	CNGA4
64994	0	0.491488	1	SMIM21	0	SMIM21
64996	0	0.491488	1	HELZ2	0	HELZ2
64998	0	0.491488	1	PDE4B	0	PDE4B
65000	0	0.491488	1	DYNLL1	0	DYNLL1
65003	0	0.491488	1	DEFB124	0	DEFB124
65005	0	0.491488	1	GON4L	0	GON4L
65007	0	0.491488	1	PHYH	0	PHYH
65009	0	0.491488	1	SCML1	0	SCML1
65011	0	0.491488	1	SCD5	0	SCD5
65013	0	0.491488	1	SIL1	0	SIL1
65015	0	0.491488	1	BTF3	0	BTF3
65017	0	0.491488	1	CASTOR1	0	CASTOR1
65020	0	0.491488	1	DEFB107A	0	DEFB107A
65022	0	0.491488	1	DEFB128	0	DEFB128
65024	0	0.491488	1	ZNF630	0	ZNF630
65026	0	0.491488	1	NPM1	0	NPM1
65028	0	0.491488	1	DEFB130	0	DEFB130
65030	0	0.491488	1	NCKAP5L	0	NCKAP5L
65032	0	0.491488	1	EIF3C	0	EIF3C
65034	0	0.491488	1	GAB4	0	GAB4
65036	0	0.491488	1	DIXDC1	0	DIXDC1
65038	0	0.491488	1	SLC38A10	0	SLC38A10
65041	0	0.491488	1	NARF	0	NARF
65043	0	0.491488	1	GOLGA6A	0	GOLGA6A
65046	0	0.491488	1	PRPS2	0	PRPS2
65048	0	0.491488	1	C20orf27	0	C20orf27
65050	0	0.491488	1	TRIOBP	0	TRIOBP
65054	0	0.491488	1	BOLA2B	0	BOLA2B
65058	0	0.491488	1	ATAD3C	0	ATAD3C
65060	0	0.491488	1	EFEMP1	0	EFEMP1
65063	0	0.491488	1	SLC25A29	0	SLC25A29
65065	0	0.491488	1	ZBTB7C	0	ZBTB7C
65067	0	0.491488	1	ATP6V1C2	0	ATP6V1C2
65069	0	0.491488	1	SPATA6L	0	SPATA6L
65071	0	0.491488	1	MPEG1	0	MPEG1
65073	0	0.491488	1	TBC1D28	0	TBC1D28
65075	0	0.491488	1	MROH7	0	MROH7
65077	0	0.491488	1	NPRL3	0	NPRL3
65079	0	0.491488	1	THEMIS2	0	THEMIS2
65081	0	0.491488	1	FHL2	0	FHL2
65083	0	0.491488	1	CATSPERZ	0	CATSPERZ
65085	0	0.491488	1	PRSS53	0	PRSS53
65087	0	0.491488	1	SIRPG	0	SIRPG
65089	0	0.491488	1	RUSC1-AS1	0	RUSC1-AS1
65091	0	0.491488	1	KLHL35	0	KLHL35
65093	0	0.491488	1	DNAJB2	0	DNAJB2
65095	0	0.491488	1	RPS4Y2	0	RPS4Y2
65097	0	0.491488	1	KREMEN1	0	KREMEN1
65099	0	0.491488	1	CCNL2	0	CCNL2
65101	0	0.491488	1	MAP9	0	MAP9
65103	0	0.491488	1	PTGFR	0	PTGFR
65106	0	0.491488	1	USP9X	0	USP9X
65108	0	0.491488	1	SPAG8	0	SPAG8
65110	0	0.491488	1	IAH1	0	IAH1
65112	0	0.491488	1	SPRED3	0	SPRED3
65114	0	0.491488	1	ZDHHC19	0	ZDHHC19
65116	0	0.491488	1	CREBZF	0	CREBZF
65118	0	0.491488	1	PRMT5	0	PRMT5
65120	0	0.491488	1	ZMYM5	0	ZMYM5
65123	0	0.491488	1	SAPCD1	0	SAPCD1
65126	0	0.491488	1	IFFO1	0	IFFO1
65128	0	0.491488	1	CHTF8	0	CHTF8
65130	0	0.491488	1	TYW5	0	TYW5
65132	0	0.491488	1	NBPF10	0	NBPF10
65136	0	0.491488	1	TMEM232	0	TMEM232
65138	0	0.491488	1	CDC42	0	CDC42
65141	0	0.491488	1	CDK20	0	CDK20
65143	0	0.491488	1	OXLD1	0	OXLD1
65145	0	0.491488	1	ACBD7	0	ACBD7
65147	0	0.491488	1	STRN4	0	STRN4
65149	0	0.491488	1	GPER1	0	GPER1
65153	0	0.491488	1	C8orf74	0	C8orf74
65155	0	0.491488	1	CD53	0	CD53
65157	0	0.491488	1	CD63	0	CD63
65159	0	0.491488	1	FAM133B	0	FAM133B
65161	0	0.491488	1	SPP1	0	SPP1
65163	0	0.491488	1	MUC17	0	MUC17
65165	0	0.491488	1	ARAP1	0	ARAP1
65167	0	0.491488	1	CKLF	0	CKLF
65169	0	0.491488	1	SLAIN1	0	SLAIN1
65171	0	0.491488	1	CEP44	0	CEP44
65173	0	0.491488	1	LFNG	0	LFNG
65175	0	0.491488	1	MCHR2	0	MCHR2
65177	0	0.491488	1	ZNF765	0	ZNF765
65179	0	0.491488	1	AGTRAP	0	AGTRAP
65181	0	0.491488	1	CLDND1	0	CLDND1
65183	0	0.491488	1	PAQR3	0	PAQR3
65185	0	0.491488	1	MINDY1	0	MINDY1
65187	0	0.491488	1	DCLK2	0	DCLK2
65189	0	0.491488	1	ADAMTSL1	0	ADAMTSL1
65191	0	0.491488	1	DCUN1D4	0	DCUN1D4
65193	0	0.491488	1	HAGH	0	HAGH
65195	0	0.491488	1	YARS2	0	YARS2
65197	0	0.491488	1	C6orf48	0	C6orf48
65200	0	0.491488	1	ZBTB8A	0	ZBTB8A
65202	0	0.491488	1	FABP6	0	FABP6
65204	0	0.491488	1	PHF11	0	PHF11
65206	0	0.491488	1	ASB1	0	ASB1
65208	0	0.491488	1	MINDY2	0	MINDY2
65210	0	0.491488	1	SLC26A6	0	SLC26A6
65212	0	0.491488	1	SIDT2	0	SIDT2
65214	0	0.491488	1	ERAP1	0	ERAP1
65216	0	0.491488	1	ATF3	0	ATF3
65219	0	0.491488	1	ACP1	0	ACP1
65221	0	0.491488	1	DEFB104B	0	DEFB104B
65223	0	0.491488	1	KIAA0895L	0	KIAA0895L
65225	0	0.491488	1	HIST2H2AA4	0	HIST2H2AA4
65227	0	0.491488	1	PTPN20	0	PTPN20
65230	0	0.491488	1	TROVE2	0	TROVE2
65232	0	0.491488	1	PGP	0	PGP
65234	0	0.491488	1	CEP63	0	CEP63
65236	0	0.491488	1	NAAA	0	NAAA
65238	0	0.491488	1	ZNF596	0	ZNF596
65240	0	0.491488	1	SLC16A3	0	SLC16A3
65242	0	0.491488	1	CAST	0	CAST
65245	0	0.491488	1	PSAP	0	PSAP
65248	0	0.491488	1	ZNF565	0	ZNF565
65250	0	0.491488	1	CARHSP1	0	CARHSP1
65252	0	0.491488	1	FRMD6	0	FRMD6
65254	0	0.491488	1	GTF2H2C_2	0	GTF2H2C_2
65257	0	0.491488	1	SLC12A6	0	SLC12A6
65259	0	0.491488	1	SLC35A2	0	SLC35A2
65261	0	0.491488	1	ZNF706	0	ZNF706
65263	0	0.491488	1	DIAPH3	0	DIAPH3
65265	0	0.491488	1	AGAP3	0	AGAP3
65267	0	0.491488	1	SLC9A6	0	SLC9A6
65269	0	0.491488	1	LTBP4	0	LTBP4
65272	0	0.491488	1	FEZ2	0	FEZ2
65275	0	0.491488	1	SMC2	0	SMC2
65277	0	0.491488	1	ENGASE	0	ENGASE
65279	0	0.491488	1	TMEM8B	0	TMEM8B
65281	0	0.491488	1	MAP4K1	0	MAP4K1
65283	0	0.491488	1	DBNDD1	0	DBNDD1
65285	0	0.491488	1	NGDN	0	NGDN
65287	0	0.491488	1	SHPRH	0	SHPRH
65289	0	0.491488	1	MSANTD1	0	MSANTD1
65291	0	0.491488	1	NECTIN2	0	NECTIN2
65293	0	0.491488	1	FGR	0	FGR
65295	0	0.491488	1	STAG2	0	STAG2
65299	0	0.491488	1	METTL12	0	METTL12
65301	0	0.491488	1	TPM3	0	TPM3
65305	0	0.491488	1	SLC6A3	0	SLC6A3
65307	0	0.491488	1	MSMP	0	MSMP
65309	0	0.491488	1	SMAP1	0	SMAP1
65311	0	0.491488	1	TMEM237	0	TMEM237
65313	0	0.491488	1	NUTM2G	0	NUTM2G
65315	0	0.491488	1	S100A7L2	0	S100A7L2
65317	0	0.491488	1	SLA	0	SLA
65319	0	0.491488	1	SRD5A1	0	SRD5A1
65321	0	0.491488	1	PHACTR4	0	PHACTR4
65323	0	0.491488	1	RCC1	0	RCC1
65325	0	0.491488	1	REC8	0	REC8
65327	0	0.491488	1	CLCC1	0	CLCC1
65329	0	0.491488	1	DBNDD2	0	DBNDD2
65331	0	0.491488	1	CTXN3	0	CTXN3
65333	0	0.491488	1	C9orf116	0	C9orf116
65335	0	0.491488	1	SSTR2	0	SSTR2
65338	0	0.491488	1	SSTR3	0	SSTR3
65340	0	0.491488	1	TBXA2R	0	TBXA2R
65343	0	0.491488	1	TNFRSF1B	0	TNFRSF1B
65346	0	0.491488	1	TOP2A	0	TOP2A
65348	0	0.491488	1	TOP2B	0	TOP2B
65350	0	0.491488	1	TUBB2A	0	TUBB2A
65352	0	0.491488	1	TUBG1	0	TUBG1
65355	0	0.491488	1	MZT1	0	MZT1
65357	0	0.491488	1	UGT1A6	0	UGT1A6
65360	0	0.491488	1	ZNF493	0	ZNF493
65363	0	0.491488	1	LYRM9	0	LYRM9
65365	0	0.491488	1	QSER1	0	QSER1
65367	0	0.491488	1	TP53I11	0	TP53I11
65369	0	0.491488	1	MYH14	0	MYH14
65372	0	0.491488	1	GPBAR1	0	GPBAR1
65374	0	0.491488	1	ZNF436	0	ZNF436
65376	0	0.491488	1	SEC31A	0	SEC31A
65378	0	0.491488	1	RNF214	0	RNF214
65381	0	0.491488	1	DPH5	0	DPH5
65383	0	0.491488	1	NR1I3	0	NR1I3
65385	0	0.491488	1	GNAS	0	GNAS
65389	0	0.491488	1	VPS37D	0	VPS37D
65391	0	0.491488	1	NXPE4	0	NXPE4
65393	0	0.491488	1	AGAP7P	0	AGAP7P
65398	0	0.491488	1	ALG9	0	ALG9
65400	0	0.491488	1	ECT2L	0	ECT2L
65402	0	0.491488	1	FAM110C	0	FAM110C
65404	0	0.491488	1	VCAM1	0	VCAM1
65406	0	0.491488	1	SRSF1	0	SRSF1
65408	0	0.491488	1	FAM127B	0	FAM127B
65410	0	0.491488	1	FAM127C	0	FAM127C
65412	0	0.491488	1	SLC29A1	0	SLC29A1
65414	0	0.491488	1	CDC16	0	CDC16
65416	0	0.491488	1	TBCE	0	TBCE
65418	0	0.491488	1	FAM177A1	0	FAM177A1
65420	0	0.491488	1	PAICS	0	PAICS
65422	0	0.491488	1	IKZF2	0	IKZF2
65425	0	0.491488	1	ABCC6	0	ABCC6
65428	0	0.491488	1	FKTN	0	FKTN
65430	0	0.491488	1	CLRN2	0	CLRN2
65432	0	0.491488	1	ADGRG2	0	ADGRG2
65435	0	0.491488	1	DBI	0	DBI
65437	0	0.491488	1	KIAA1147	0	KIAA1147
65440	0	0.491488	1	FAM155A	0	FAM155A
65442	0	0.491488	1	SLC45A1	0	SLC45A1
65444	0	0.491488	1	OC90	0	OC90
65446	0	0.491488	1	PLIN4	0	PLIN4
65448	0	0.491488	1	CCDC61	0	CCDC61
65451	0	0.491488	1	FBXO41	0	FBXO41
65453	0	0.491488	1	NOBOX	0	NOBOX
65455	0	0.491488	1	U2SURP	0	U2SURP
65457	0	0.491488	1	MYBL1	0	MYBL1
65459	0	0.491488	1	DLGAP3	0	DLGAP3
65461	0	0.491488	1	UNK	0	UNK
65463	0	0.491488	1	LMTK3	0	LMTK3
65465	0	0.491488	1	WHAMM	0	WHAMM
65468	0	0.491488	1	WTIP	0	WTIP
65470	0	0.491488	1	TTC36	0	TTC36
65472	0	0.491488	1	SLC38A8	0	SLC38A8
65474	0	0.491488	1	BEND3	0	BEND3
65476	0	0.491488	1	UNCX	0	UNCX
65478	0	0.491488	1	DYNC2H1	0	DYNC2H1
65480	0	0.491488	1	ASPG	0	ASPG
65482	0	0.491488	1	MYO5B	0	MYO5B
65485	0	0.491488	1	SYCN	0	SYCN
65487	0	0.491488	1	FBXO46	0	FBXO46
65489	0	0.491488	1	MFSD2B	0	MFSD2B
65491	0	0.491488	1	PLEKHM3	0	PLEKHM3
65494	0	0.491488	1	MBOAT1	0	MBOAT1
65496	0	0.491488	1	USP45	0	USP45
65498	0	0.491488	1	TMEM8C	0	TMEM8C
65500	0	0.491488	1	ZNF275	0	ZNF275
65503	0	0.491488	1	TNRC18	0	TNRC18
65505	0	0.491488	1	MEGF9	0	MEGF9
65507	0	0.491488	1	TMEM223	0	TMEM223
65509	0	0.491488	1	RBM44	0	RBM44
65511	0	0.491488	1	SHISA3	0	SHISA3
65513	0	0.491488	1	TBX18	0	TBX18
65515	0	0.491488	1	TSPAN11	0	TSPAN11
65518	0	0.491488	1	RASSF10	0	RASSF10
65520	0	0.491488	1	WIPF3	0	WIPF3
65522	0	0.491488	1	TMC3	0	TMC3
65524	0	0.491488	1	PPP1R1C	0	PPP1R1C
65526	0	0.491488	1	TMEM218	0	TMEM218
65528	0	0.491488	1	TRABD2A	0	TRABD2A
65530	0	0.491488	1	TMEM120B	0	TMEM120B
65534	0	0.491488	1	SEBOX	0	SEBOX
65536	0	0.491488	1	GSTT2B	0	GSTT2B
65538	0	0.491488	1	DNLZ	0	DNLZ
65540	0	0.491488	1	THOC2	0	THOC2
65542	0	0.491488	1	ACD	0	ACD
65544	0	0.491488	1	DHRS4L1	0	DHRS4L1
65546	0	0.491488	1	TCTN1	0	TCTN1
65548	0	0.491488	1	TOM1L2	0	TOM1L2
65550	0	0.491488	1	GPD2	0	GPD2
65552	0	0.491488	1	POTEE	0	POTEE
65554	0	0.491488	1	NAA60	0	NAA60
65556	0	0.491488	1	DNAAF2	0	DNAAF2
65558	0	0.491488	1	PLOD3	0	PLOD3
65560	0	0.491488	1	DDTL	0	DDTL
65562	0	0.491488	1	SERPINA3	0	SERPINA3
65564	0	0.491488	1	UQCC3	0	UQCC3
65566	0	0.491488	1	MCC	0	MCC
65568	0	0.491488	1	ZNF154	0	ZNF154
65570	0	0.491488	1	NFE4	0	NFE4
65572	0	0.491488	1	RELL1	0	RELL1
65574	0	0.491488	1	C6orf201	0	C6orf201
65576	0	0.491488	1	LNP1	0	LNP1
65578	0	0.491488	1	KRTAP24-1	0	KRTAP24-1
65580	0	0.491488	1	AADAC	0	AADAC
65582	0	0.491488	1	NDUFAF8	0	NDUFAF8
65584	0	0.491488	1	AOC1	0	AOC1
65586	0	0.491488	1	ACACB	0	ACACB
65588	0	0.491488	1	MEX3A	0	MEX3A
[truncated: 7,876 more rows]

## Sheet: KEGG
GOID	GOTerm	Ontology Source	Term PValue	Group PValue	GOLevels	GOGroups	% Associated Genes	Nr. Genes	Associated Genes Found
GO:0004933	AGE-RAGE signaling pathway in diabetic complications	KEGG_17.03.2017	0.00024	0.00024	[-1]	Group0	6.06061	6	[COL1A1, EDN1, MMP2, NOS3, TGFBR2, VEGFC]
GO:0000270	Cysteine and methionine metabolism	KEGG_17.03.2017	0.00067	0.00067	[-1]	Group1	8.88889	4	[BCAT1, CBS, CTH, GOT2]
GO:0000310	Lysine degradation	KEGG_17.03.2017	0.015	0.015	[-1]	Group2	5.08475	3	[AADAT, PHYKPL, PLOD2]
GO:0000670	One carbon pool by folate	KEGG_17.03.2017	2.6e-05	2.6e-05	[-1]	Group3	20	4	[FTCD, GART, MTHFR, TYMS]
GO:0000010	Glycolysis / Gluconeogenesis	KEGG_17.03.2017	0.022	0.0024	[-1]	Group4	4.47761	3	[GAPDH, HK1, TPI1]
GO:0004066	HIF-1 signaling pathway	KEGG_17.03.2017	0.002	0.0024	[-1]	Group4	4.9505	5	[EDN1, GAPDH, HK1, NOS3, TF]
GO:0000220	Arginine biosynthesis	KEGG_17.03.2017	3.2e-05	8.5e-07	[-1]	Group5	19.0476	4	[GLUL, GOT2, NOS1, NOS3]
GO:0000250	Alanine, aspartate and glutamate metabolism	KEGG_17.03.2017	0.0037	8.5e-07	[-1]	Group5	8.57143	3	[ABAT, GLUL, GOT2]
GO:0000330	Arginine and proline metabolism	KEGG_17.03.2017	4.9e-06	8.5e-07	[-1]	Group5	12	6	[AZIN2, GOT2, NOS1, NOS3, OAT, ODC1]
GO:0000280	Valine, leucine and isoleucine degradation	KEGG_17.03.2017	0.00086	9.9e-05	[-1]	Group6	8.33333	4	[ABAT, BCAT1, MUT, PCCA]
GO:0000630	Glyoxylate and dicarboxylate metabolism	KEGG_17.03.2017	0.0001	9.9e-05	[-1]	Group6	14.2857	4	[CAT, GLUL, MUT, PCCA]
GO:0000640	Propanoate metabolism	KEGG_17.03.2017	0.0028	9.9e-05	[-1]	Group6	9.375	3	[ABAT, MUT, PCCA]

## Sheet: Reactome
GOID	GOTerm	Ontology Source	Term PValue	Group PValue	GOLevels	GOGroups	% Associated Genes	Nr. Genes	Associated Genes Found
GO:0000903	ATF6 (ATF6-alpha) activates chaperones	REACTOME_Pathways_09.11.2016	0.017	2.3e-06	[-1]	Group5	4.28571	3	[A2M, ALB, APOA1]
GO:0001578	Amino acid synthesis and interconversion (transamination)	REACTOME_Pathways_09.11.2016	0.0013	0.0013	[-1]	Group2	10.7143	3	[GLUL, GOT2, OAT]
GO:0000684	Binding and Uptake of Ligands by Scavenger Receptors	REACTOME_Pathways_09.11.2016	0.00025	2.3e-06	[-1]	Group5	10	4	[ALB, APOA1, COL1A1, HPX]
GO:0000400	Chylomicron-mediated lipid transport	REACTOME_Pathways_09.11.2016	0.017	2.3e-06	[-1]	Group5	4.28571	3	[A2M, ALB, APOA1]
GO:0000821	Defective AMN causes hereditary megaloblastic anemia 1	REACTOME_Pathways_09.11.2016	4.5e-05	2.3e-06	[-1]	Group5	15.3846	4	[A2M, ALB, APOA1, MUT]
GO:0000822	Defective CUBN causes hereditary megaloblastic anemia 1	REACTOME_Pathways_09.11.2016	4.5e-05	2.3e-06	[-1]	Group5	15.3846	4	[A2M, ALB, APOA1, MUT]
GO:0000807	Defects in cobalamin (B12) metabolism	REACTOME_Pathways_09.11.2016	4.5e-05	2.3e-06	[-1]	Group5	15.3846	4	[A2M, ALB, APOA1, MUT]
GO:0000069	Disinhibition of SNARE formation	REACTOME_Pathways_09.11.2016	8.6e-06	2.3e-06	[-1]	Group5	6.01504	8	[A2M, ALB, APOA1, F5, TF, THBS1, TTN, VEGFC]
GO:0001573	Gluconeogenesis	REACTOME_Pathways_09.11.2016	0.0033	0.0033	[-1]	Group3	5.06329	4	[GAPDH, GOT2, HK1, TPI1]
GO:0001575	Glucose metabolism	REACTOME_Pathways_09.11.2016	0.0033	0.0033	[-1]	Group3	5.06329	4	[GAPDH, GOT2, HK1, TPI1]
GO:0001571	Glycolysis	REACTOME_Pathways_09.11.2016	0.0016	0.0033	[-1]	Group3	10	3	[GAPDH, HK1, TPI1]
GO:0000520	HDL-mediated lipid transport	REACTOME_Pathways_09.11.2016	4.5e-05	2.3e-06	[-1]	Group5	15.3846	4	[A2M, ALB, APOA1, MUT]
GO:0001703	Insulin receptor recycling	REACTOME_Pathways_09.11.2016	0.0099	0.0099	[-1]	Group4	5.26316	3	[NOS1, NOS3, TF]
GO:0001092	Interaction between L1 and Ankyrins	REACTOME_Pathways_09.11.2016	9.2e-05	9.2e-05	[-1]	Group0	12.9032	4	[ACTB, ANK2, NFASC, SCN5A]
GO:0001792	Iron uptake and transport	REACTOME_Pathways_09.11.2016	0.0099	0.0099	[-1]	Group4	5.26316	3	[NOS1, NOS3, TF]
GO:0000401	Lipoprotein metabolism	REACTOME_Pathways_09.11.2016	0.017	2.3e-06	[-1]	Group5	4.28571	3	[A2M, ALB, APOA1]
GO:0000705	Metabolism of ingested SeMet, Sec, MeSec into H2Se	REACTOME_Pathways_09.11.2016	3.7e-05	3.7e-05	[-1]	Group1	33.3333	3	[CBS, CTH, SCLY]
GO:0000071	Platelet degranulation	REACTOME_Pathways_09.11.2016	6.5e-06	2.3e-06	[-1]	Group5	6.25	8	[A2M, ALB, APOA1, F5, TF, THBS1, TTN, VEGFC]
GO:0000084	ROS, RNS production in response to bacteria	REACTOME_Pathways_09.11.2016	0.0099	0.0099	[-1]	Group4	5.26316	3	[NOS1, NOS3, TF]
GO:0001682	Response to elevated platelet cytosolic Ca2+	REACTOME_Pathways_09.11.2016	8.6e-06	2.3e-06	[-1]	Group5	6.01504	8	[A2M, ALB, APOA1, F5, TF, THBS1, TTN, VEGFC]
GO:0000681	Scavenging of heme from plasma	REACTOME_Pathways_09.11.2016	0.00025	2.3e-06	[-1]	Group5	10	4	[ALB, APOA1, COL1A1, HPX]
GO:0001828	Serine biosynthesis	REACTOME_Pathways_09.11.2016	0.0013	0.0013	[-1]	Group2	10.7143	3	[GLUL, GOT2, OAT]
GO:0001793	Transferrin endocytosis and recycling	REACTOME_Pathways_09.11.2016	0.0099	0.0099	[-1]	Group4	5.26316	3	[NOS1, NOS3, TF]

## Sheet: WikiPathways
GOID	GOTerm	Ontology Source	Term PValue	Group PValue	GOLevels	GOGroups	% Associated Genes	Nr. Genes	Associated Genes Found
GO:0001946	Cori Cycle	WikiPathways_08.11.2016	0.00056	0.00056	[-1]	Group0	18.75	3	[GAPDH, HK1, TPI1]
GO:0000241	One Carbon Metabolism	WikiPathways_08.11.2016	0.00025	0.00025	[-1]	Group1	13.3333	4	[FTCD, GART, MTHFR, TYMS]
GO:0003298	Melatonin metabolism and effects	WikiPathways_08.11.2016	0.0067	0.0067	[-1]	Group2	8.10811	3	[CRY1, CRY2, EDN1]
GO:0003614	Photodynamic therapy-induced HIF-1 survival signaling	WikiPathways_08.11.2016	0.0067	0.0067	[-1]	Group3	8.10811	3	[EDN1, HK1, IGFBP3]
GO:0000560	TGF-beta Receptor Signaling	WikiPathways_08.11.2016	0.022	0.022	[-1]	Group4	5.17241	3	[TGFBR2, THBS1, ZNF423]
GO:0000015	Selenium Micronutrient Network	WikiPathways_08.11.2016	0.00031	1.2e-05	[-1]	Group5	6.74157	6	[ALB, APOA1, CAT, CBS, CTH, MTHFR]
GO:0001533	Vitamin B12 Metabolism	WikiPathways_08.11.2016	1.6e-05	1.2e-05	[-1]	Group5	11.3208	6	[ALB, APOA1, CBS, CTH, MTHFR, MUT]
GO:0000176	Folate Metabolism	WikiPathways_08.11.2016	6.5e-06	1.2e-05	[-1]	Group5	10.1449	7	[ALB, APOA1, CAT, CBS, CTH, GART, MTHFR]
GO:0002525	Trans-sulfuration and one carbon metabolism	WikiPathways_08.11.2016	0.00032	1.2e-05	[-1]	Group5	12.5	4	[CBS, CTH, MTHFR, TYMS]
